# Supplementary material (part 1 of 2)
Source: ML conference proceedings conference paper supplement (https://openreview.net/forum?id=dK2BnCH68p)

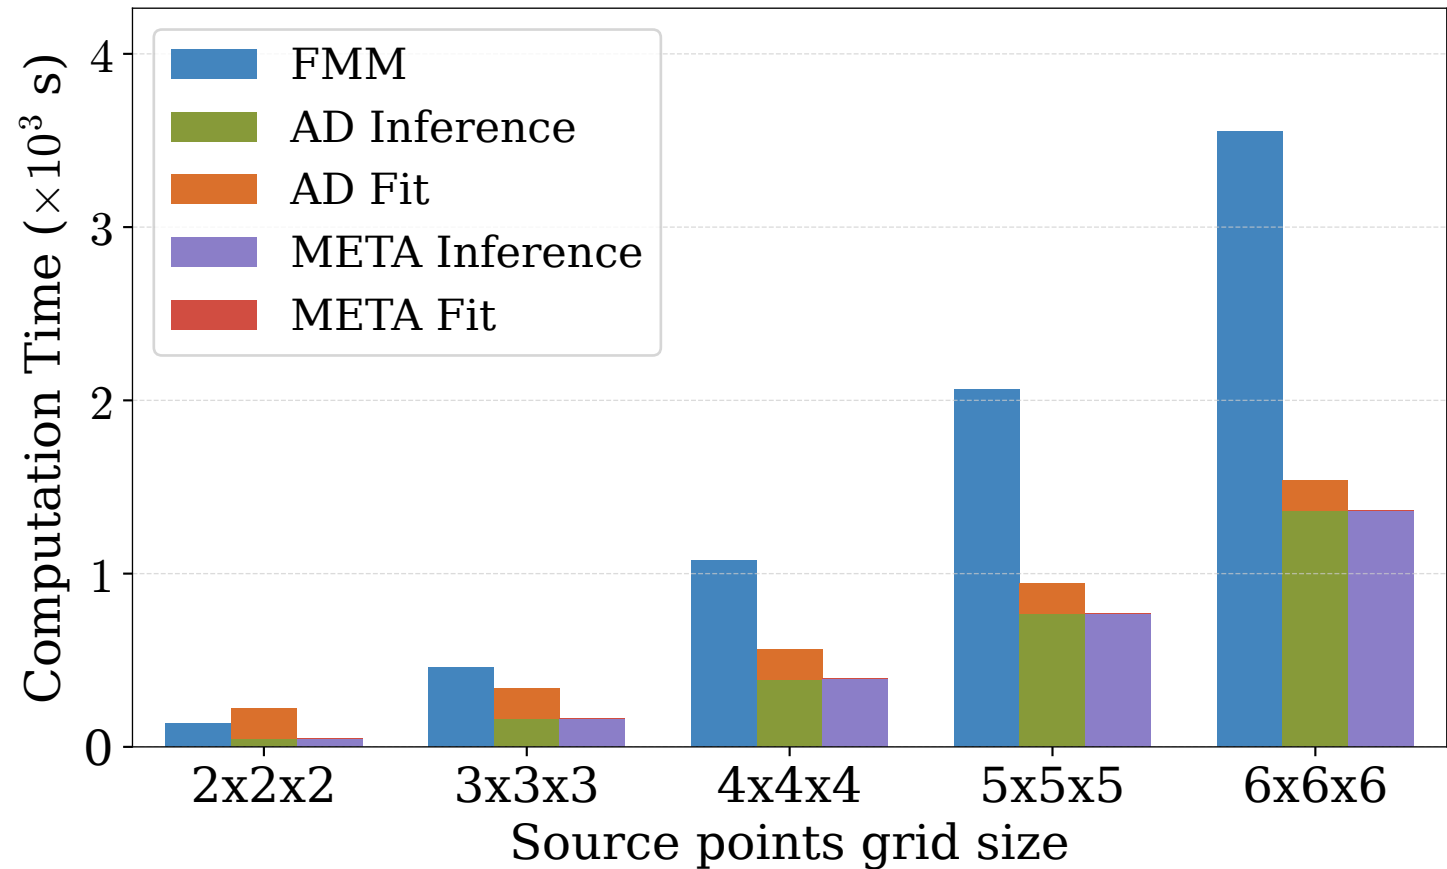

Supplement: supplementary_material [file 3d_comp_time_plot.pdf › EikonalENF_Jax-clean/experiments/fitting/figures/3d_comp_time_plot.pdf]

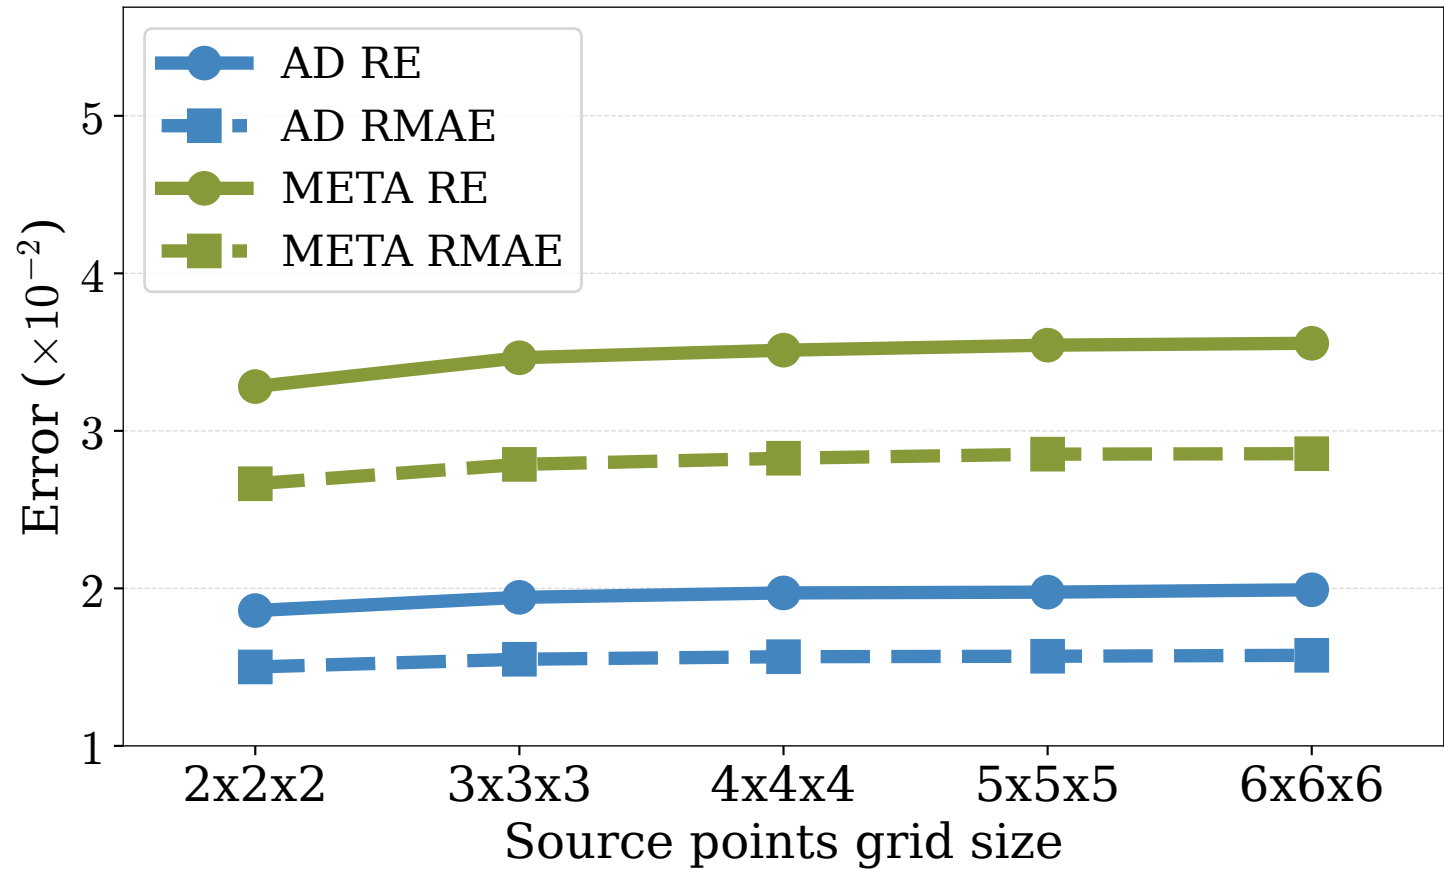

Supplement: supplementary_material [file 3d_performance_plot.pdf › EikonalENF_Jax-clean/experiments/fitting/figures/3d_performance_plot.pdf]

★ Meta-learning      Autodecoding steps:    50   100   150   200   250   300   350   400   450   500

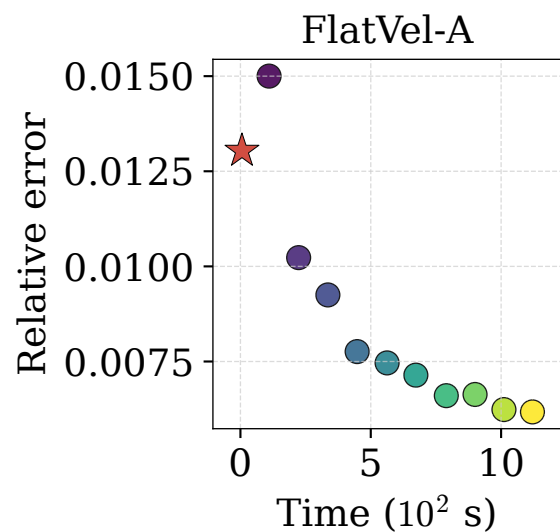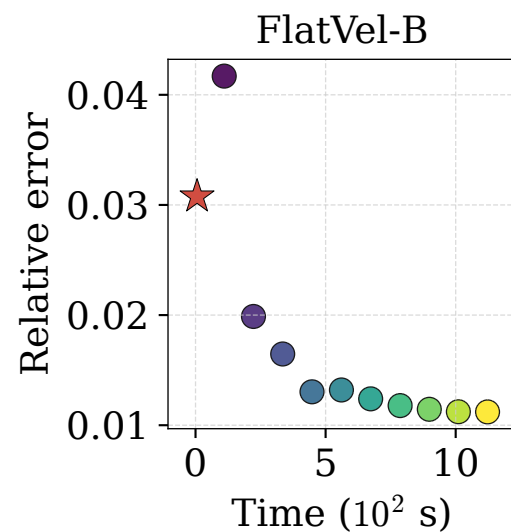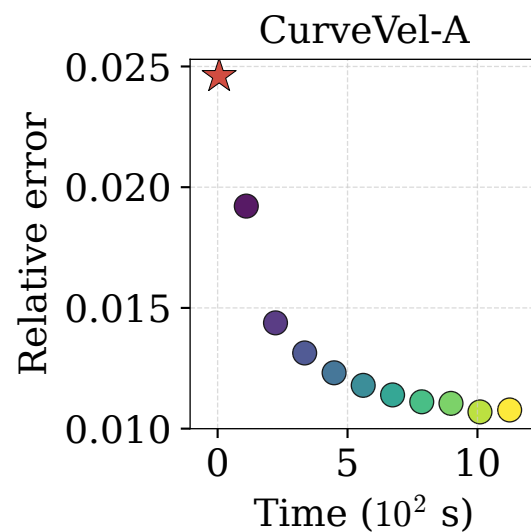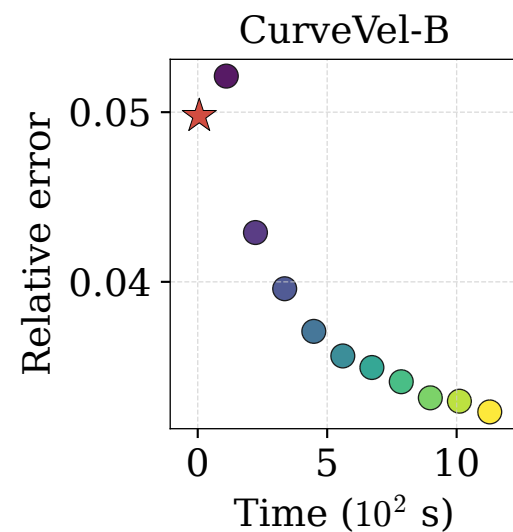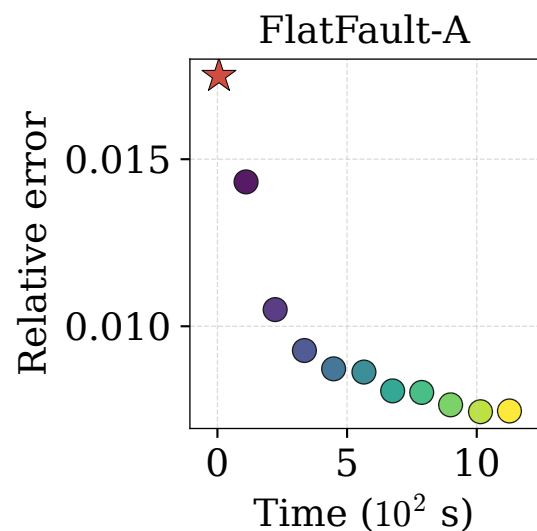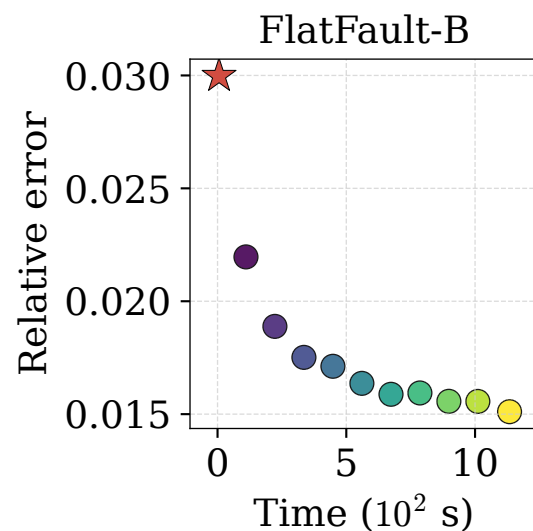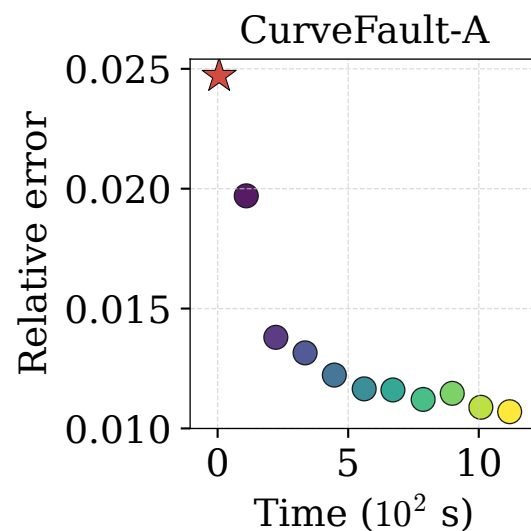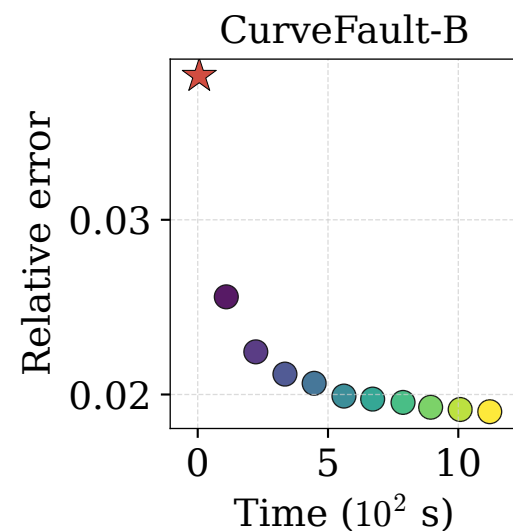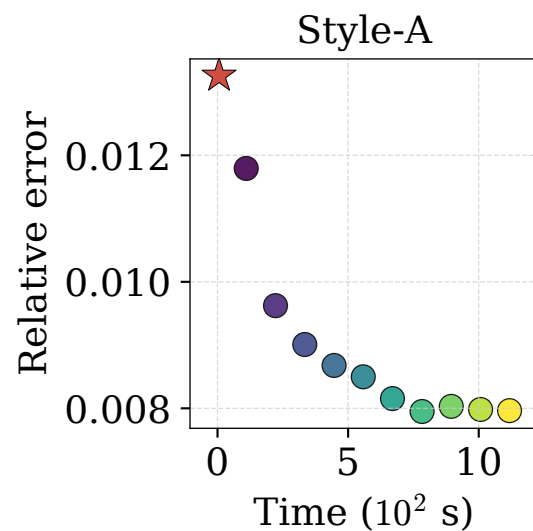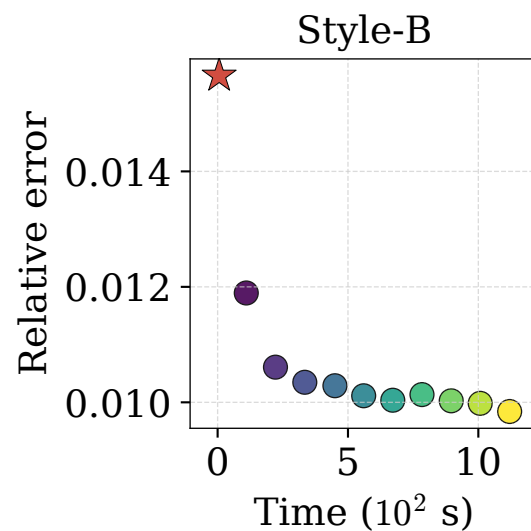

Supplement: supplementary_material [file combined_full_plots.pdf › EikonalENF_Jax-clean/experiments/fitting/figures/combined_full_plots.pdf]

Velocity Field

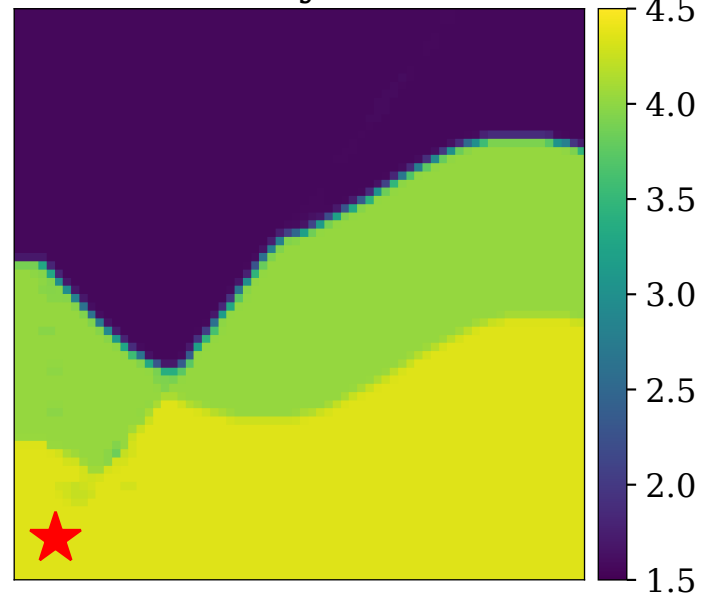

Ground Truth Time

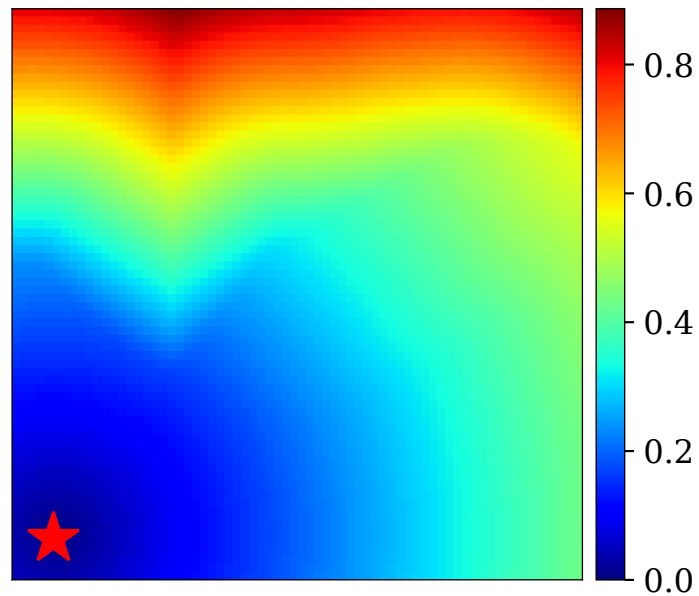

Predicted Time

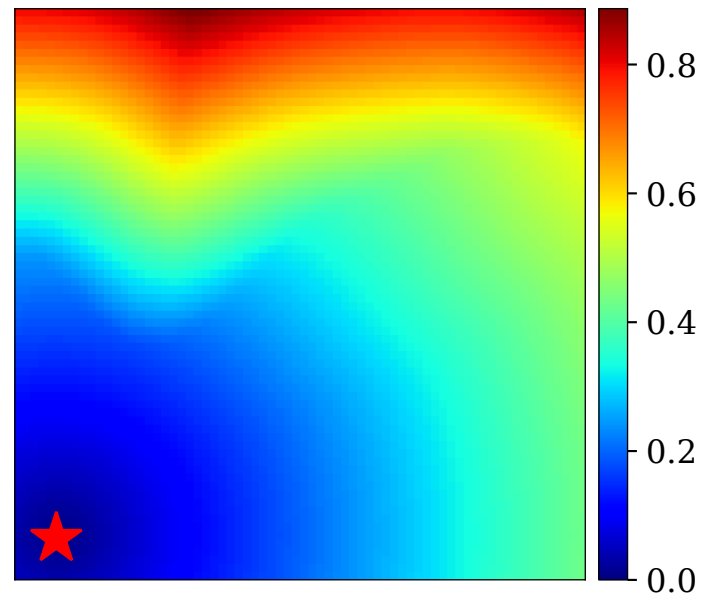

Absolute Error

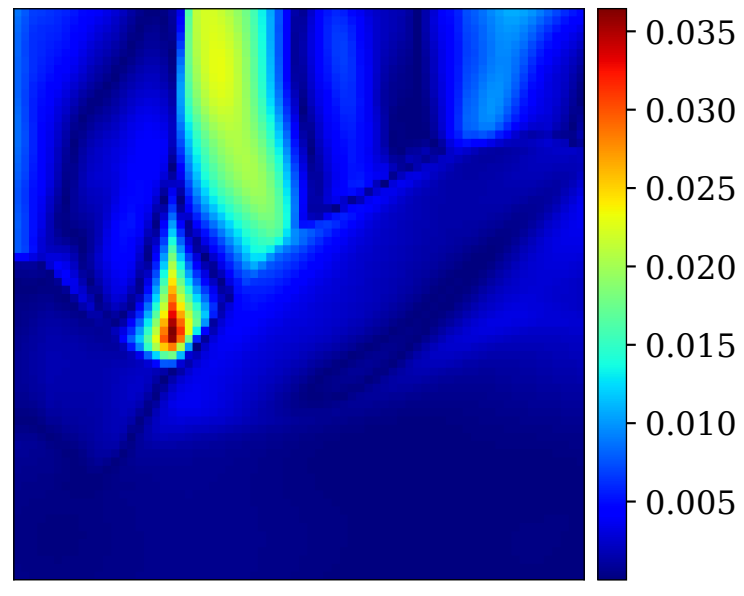

Supplement: supplementary_material [file gt_comp_full_98_(1, 1).pdf › EikonalENF_Jax-clean/experiments/fitting/figures/fwi_curvefault_a/test/gt_comp_full_98_(1, 1).pdf]

Velocity Field

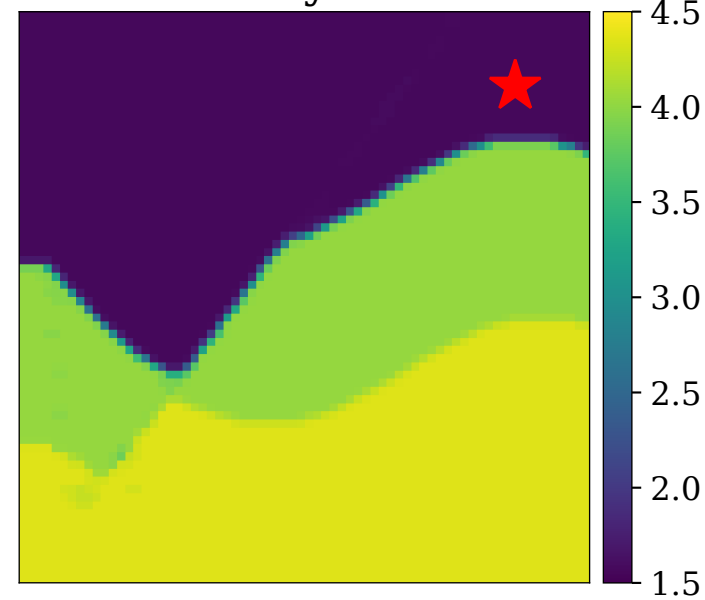

Ground Truth Time

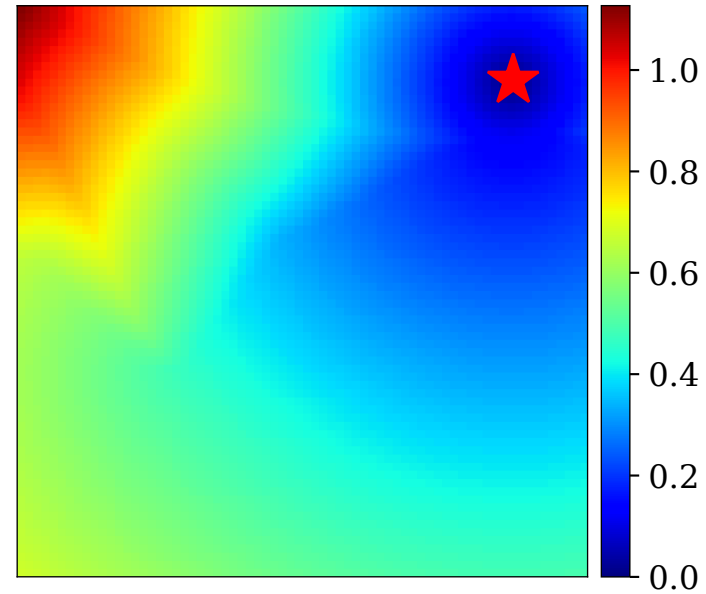

Predicted Time

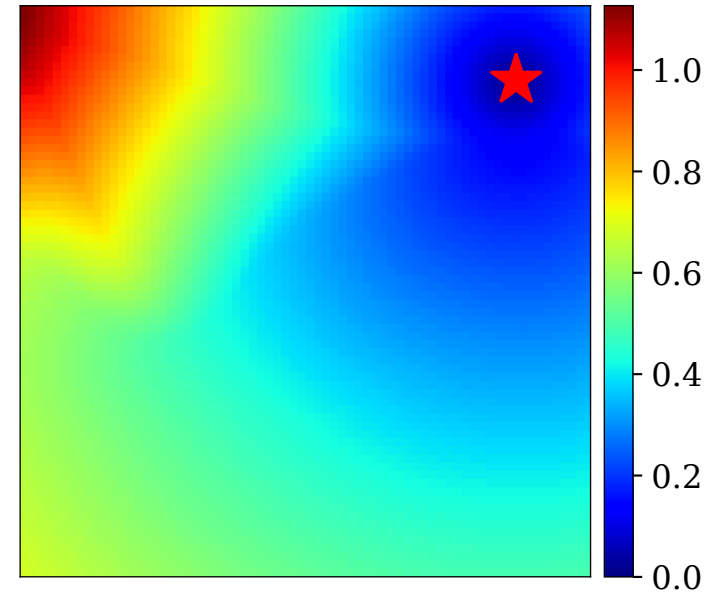

Absolute Error

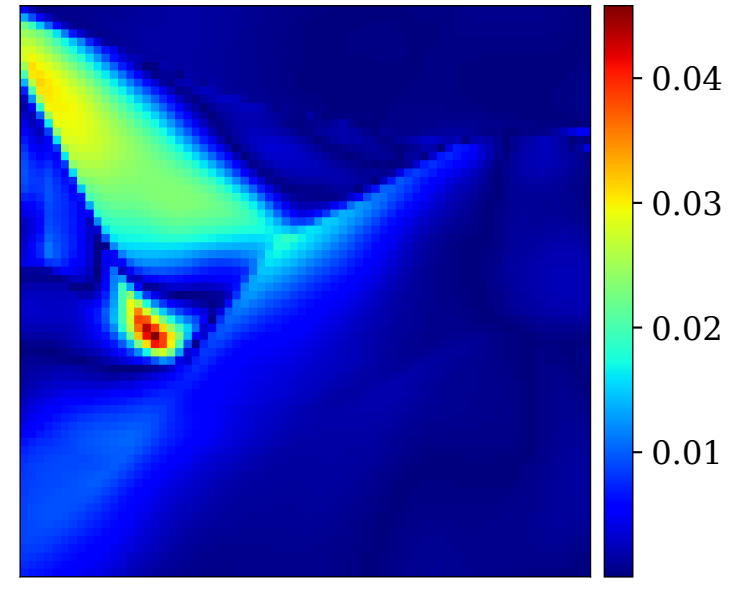

Supplement: supplementary_material [file gt_comp_full_98_(12, 12).pdf › EikonalENF_Jax-clean/experiments/fitting/figures/fwi_curvefault_a/test/gt_comp_full_98_(12, 12).pdf]

Velocity Field

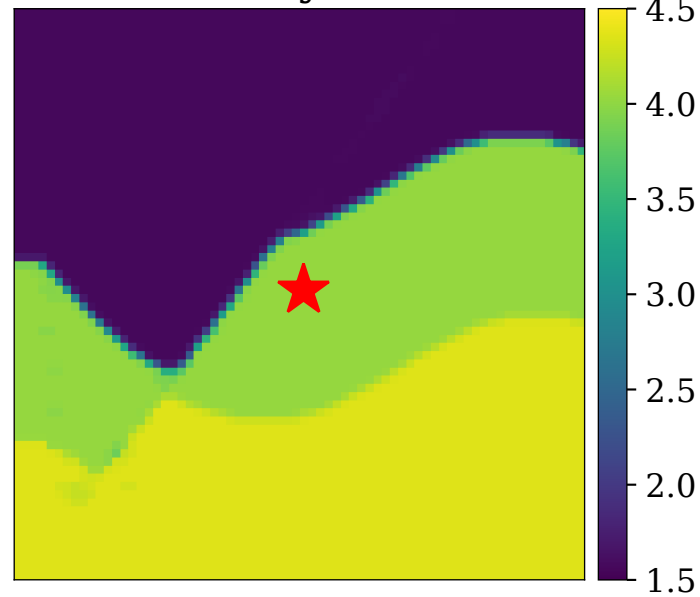

Ground Truth Time

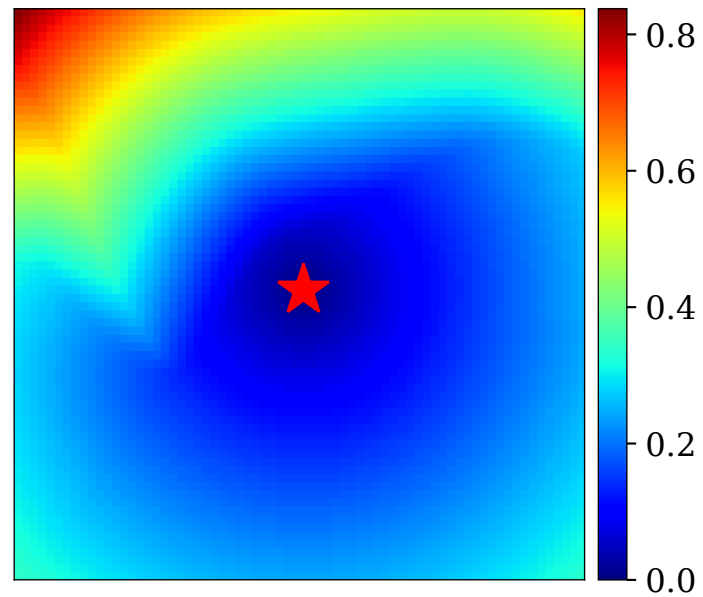

Predicted Time

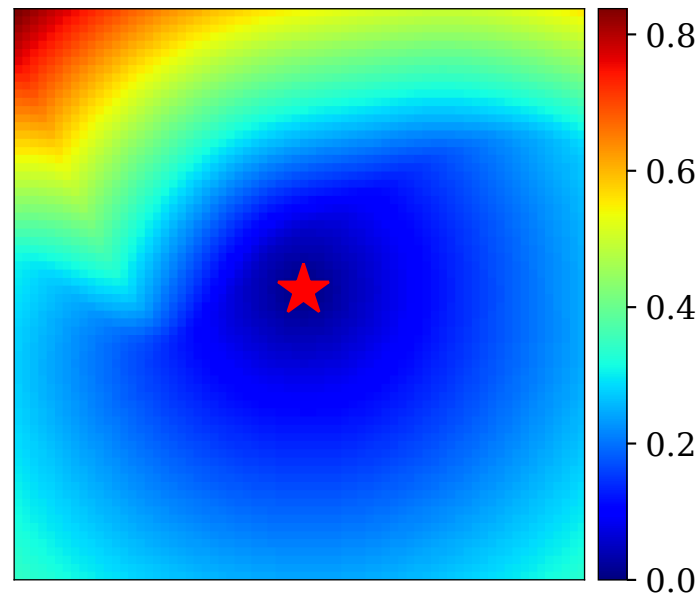

Absolute Error

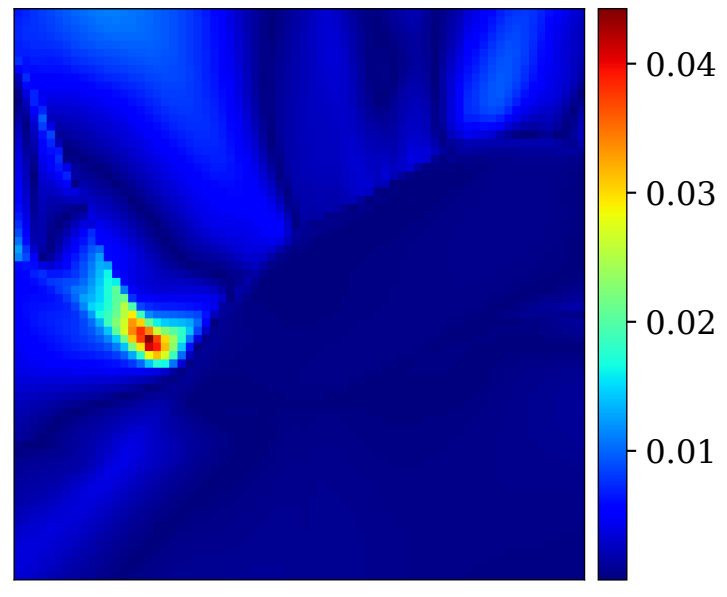

Supplement: supplementary_material [file gt_comp_full_98_(7, 7).pdf › EikonalENF_Jax-clean/experiments/fitting/figures/fwi_curvefault_a/test/gt_comp_full_98_(7, 7).pdf]

Velocity Field

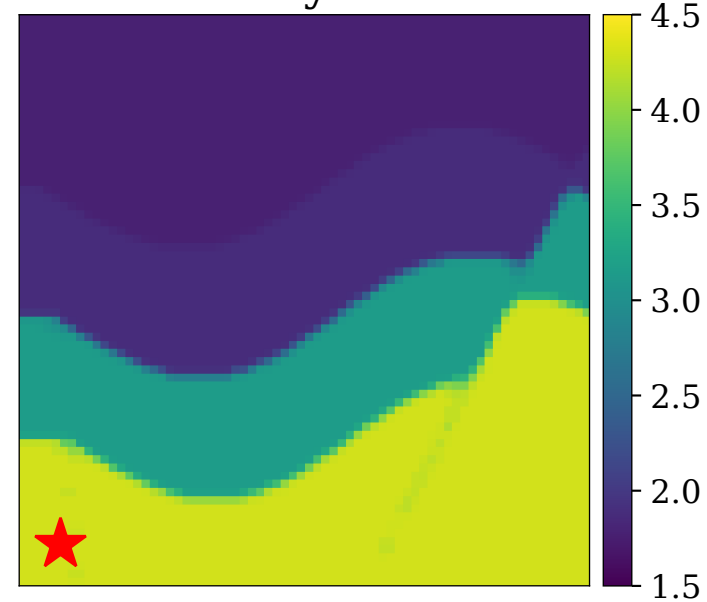

Ground Truth Time

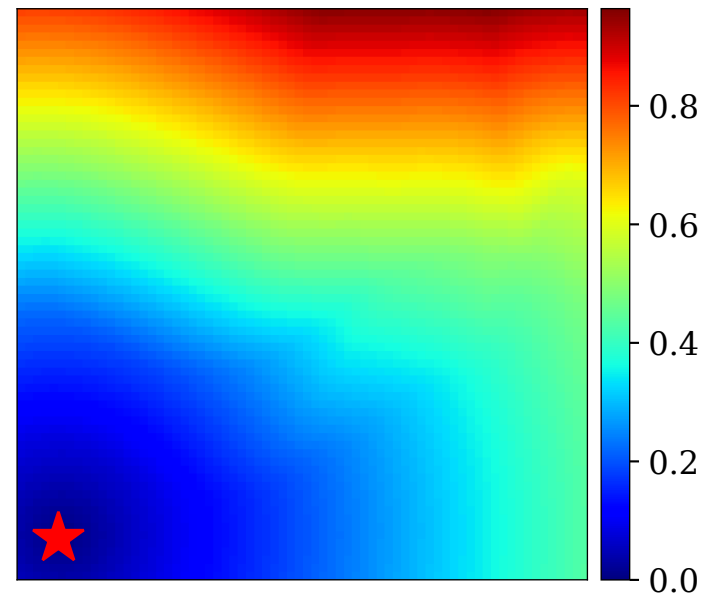

Predicted Time

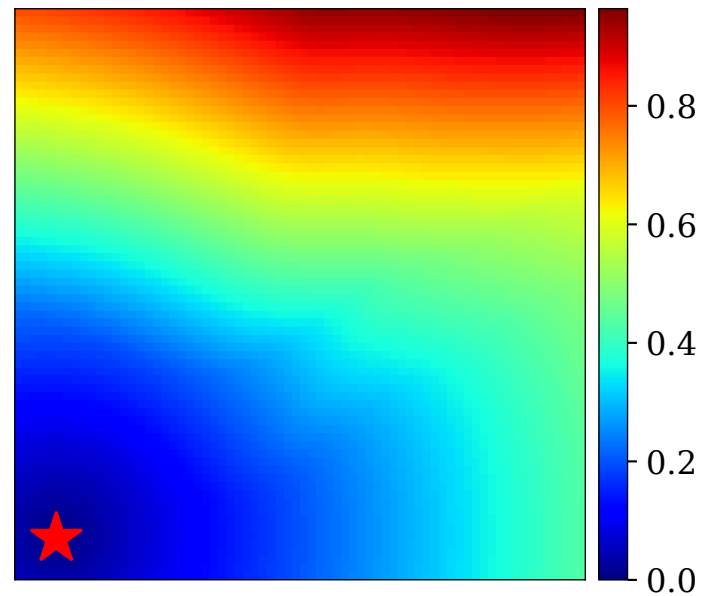

Absolute Error

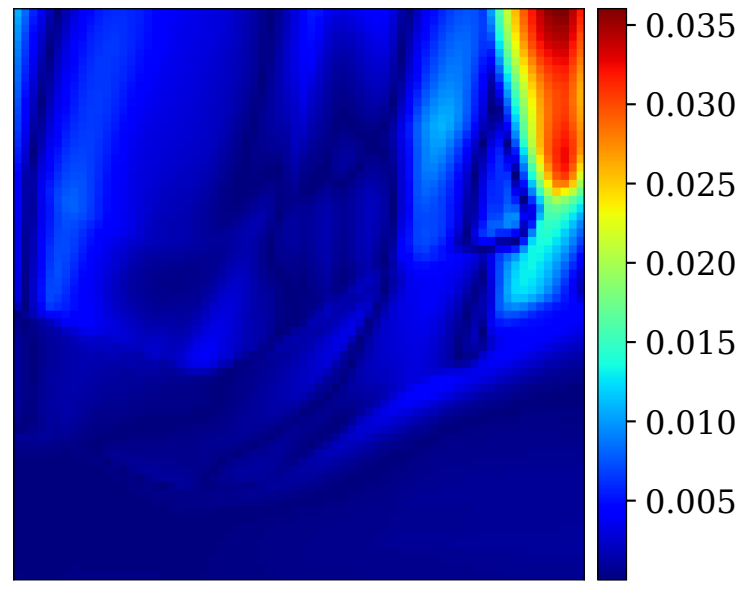

Supplement: supplementary_material [file gt_comp_full_99_(1, 1).pdf › EikonalENF_Jax-clean/experiments/fitting/figures/fwi_curvefault_a/test/gt_comp_full_99_(1, 1).pdf]

Velocity Field

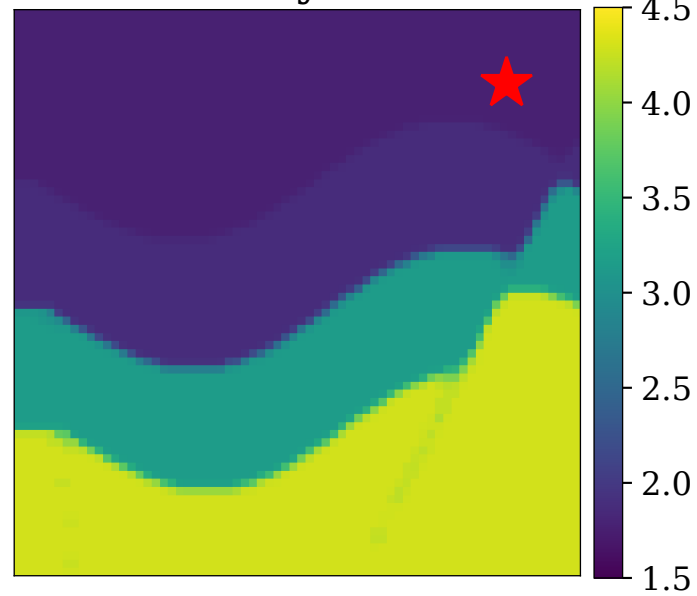

Ground Truth Time

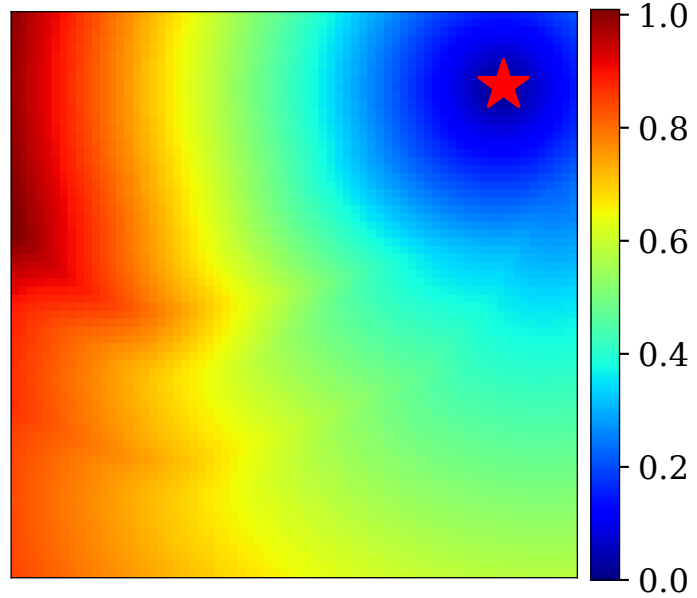

Predicted Time

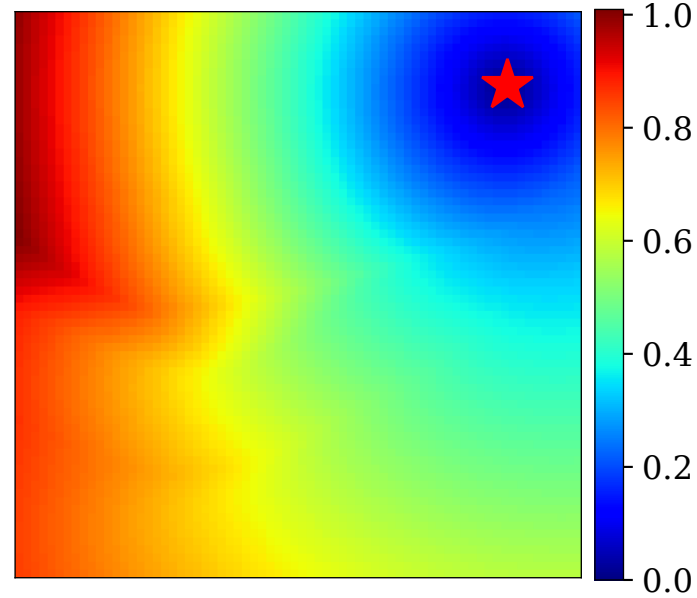

Absolute Error

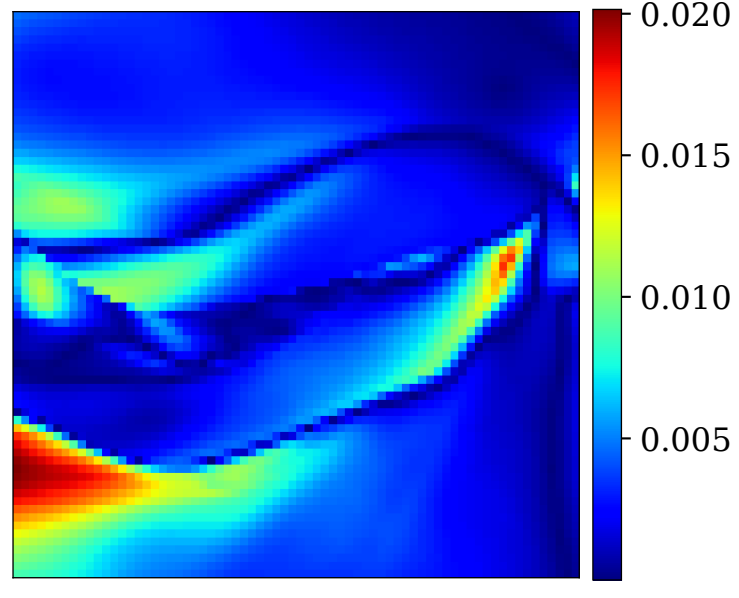

Supplement: supplementary_material [file gt_comp_full_99_(12, 12).pdf › EikonalENF_Jax-clean/experiments/fitting/figures/fwi_curvefault_a/test/gt_comp_full_99_(12, 12).pdf]

Velocity Field

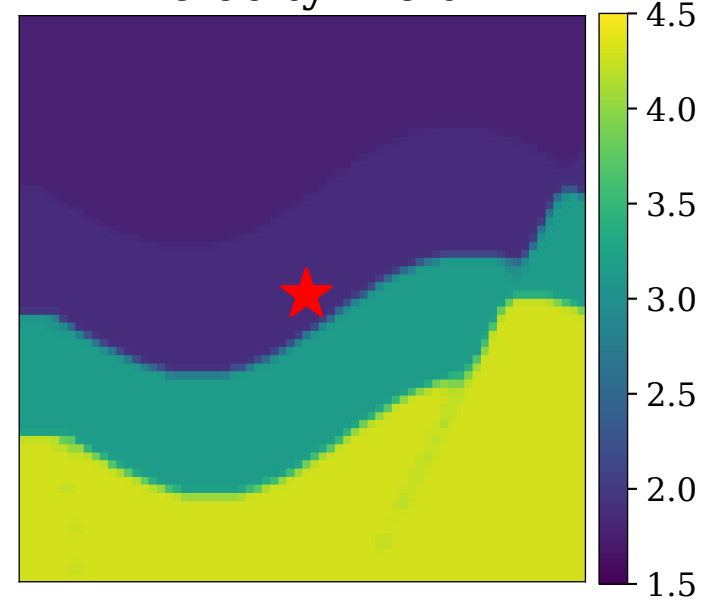

Ground Truth Time

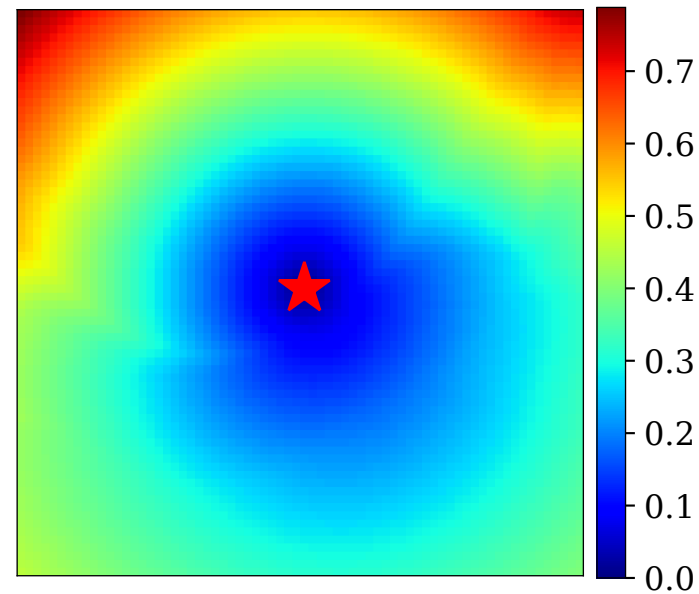

Predicted Time

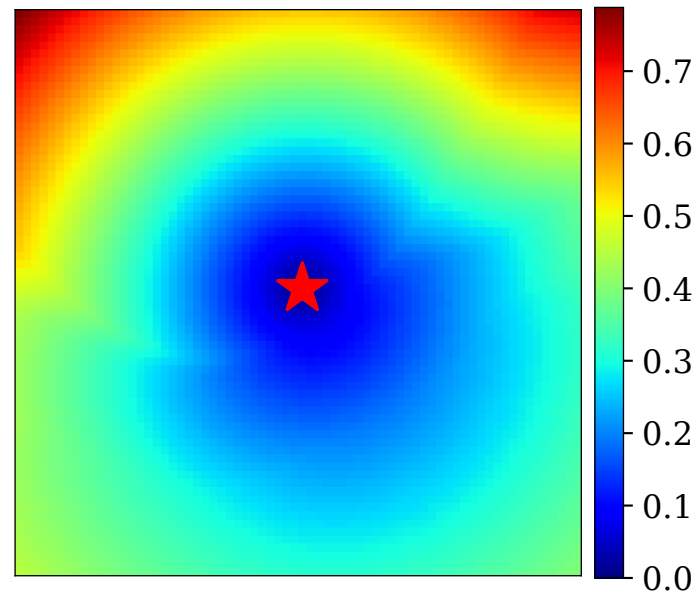

Absolute Error

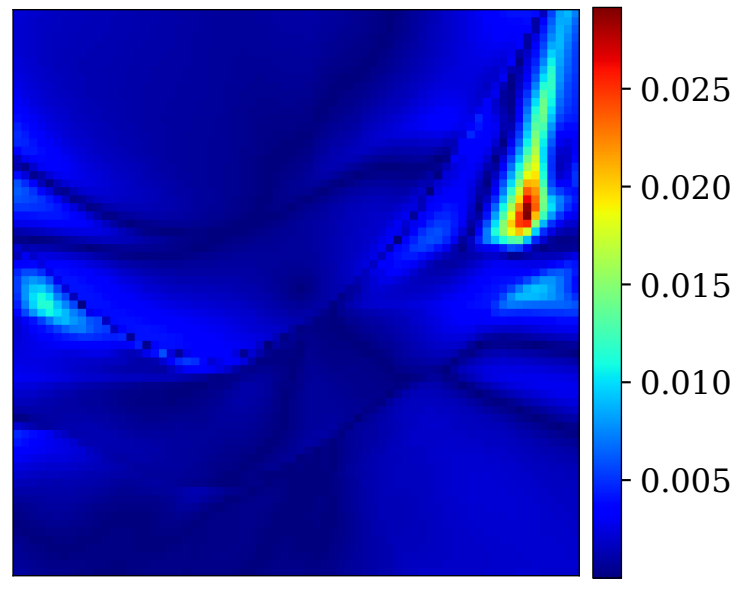

Supplement: supplementary_material [file gt_comp_full_99_(7, 7).pdf › EikonalENF_Jax-clean/experiments/fitting/figures/fwi_curvefault_a/test/gt_comp_full_99_(7, 7).pdf]

Velocity Field

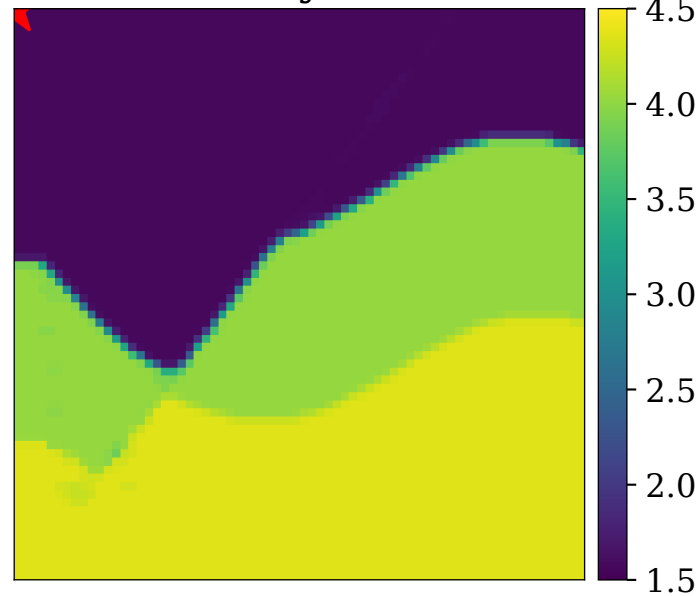

Ground Truth Time

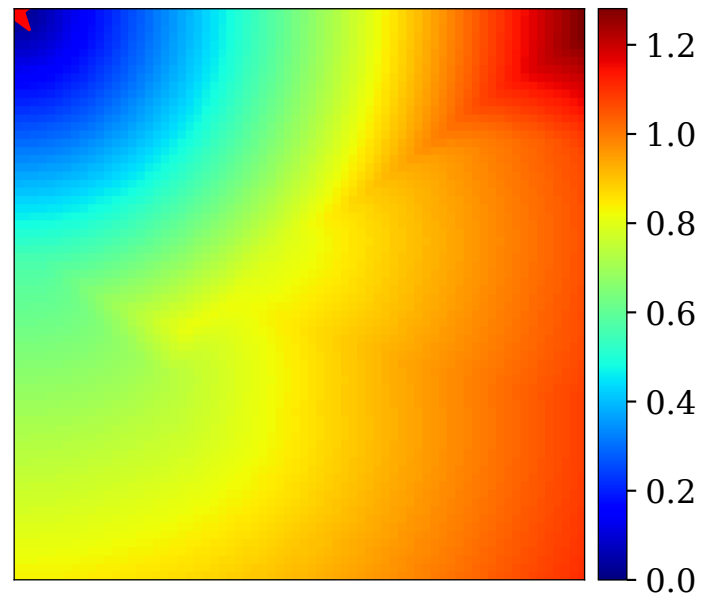

Predicted Time

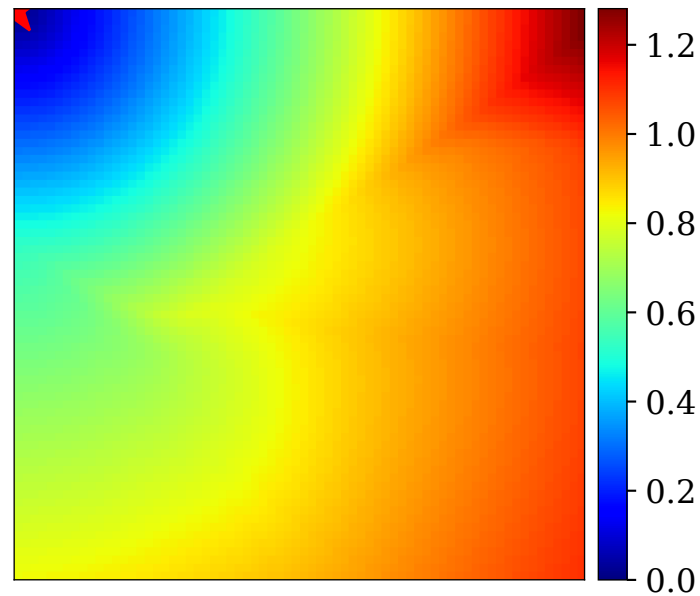

Absolute Error

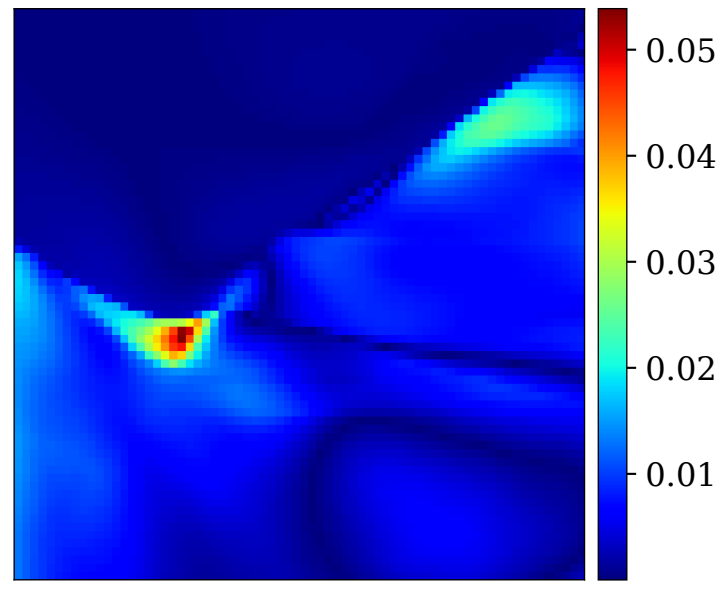

Supplement: supplementary_material [file gt_comp_top_98_(0, 0).pdf › EikonalENF_Jax-clean/experiments/fitting/figures/fwi_curvefault_a/test/gt_comp_top_98_(0, 0).pdf]

Velocity Field

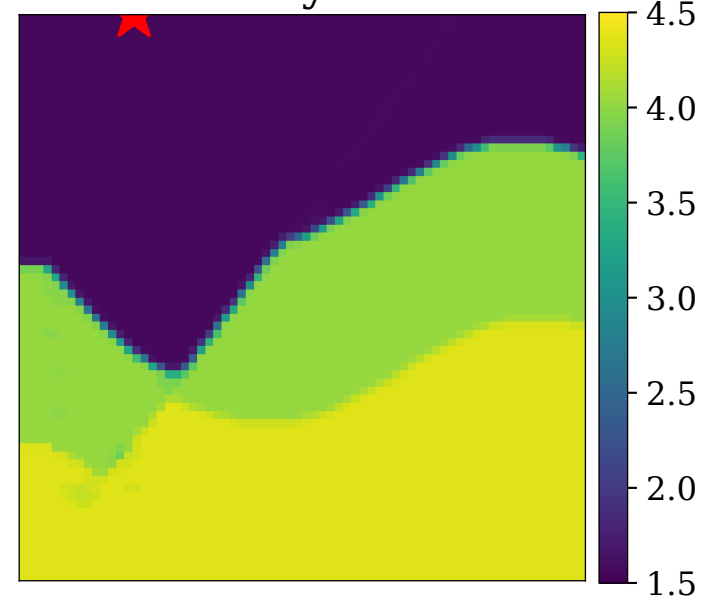

Ground Truth Time

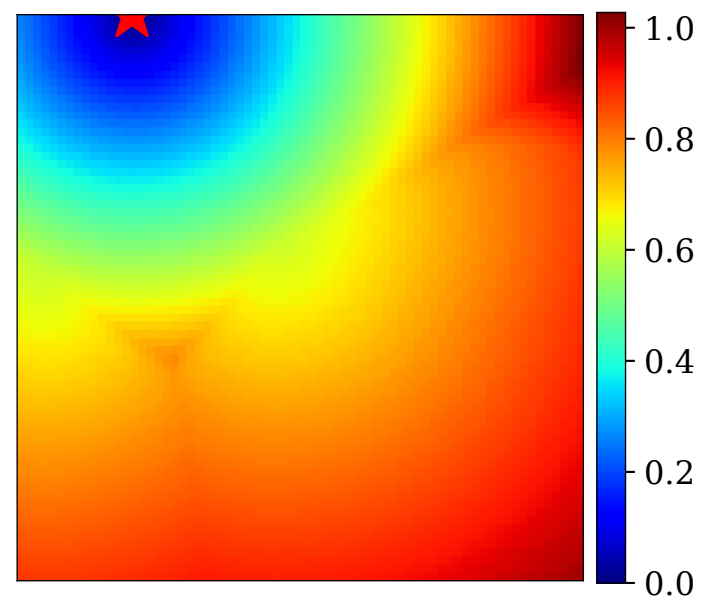

Predicted Time

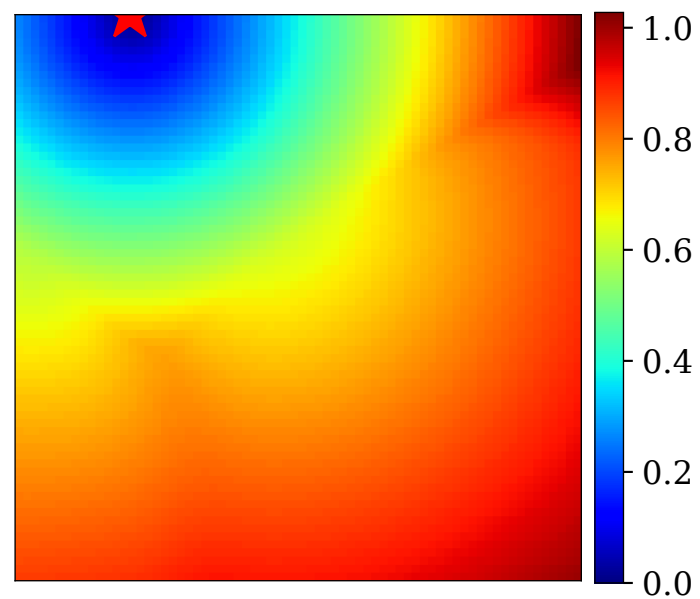

Absolute Error

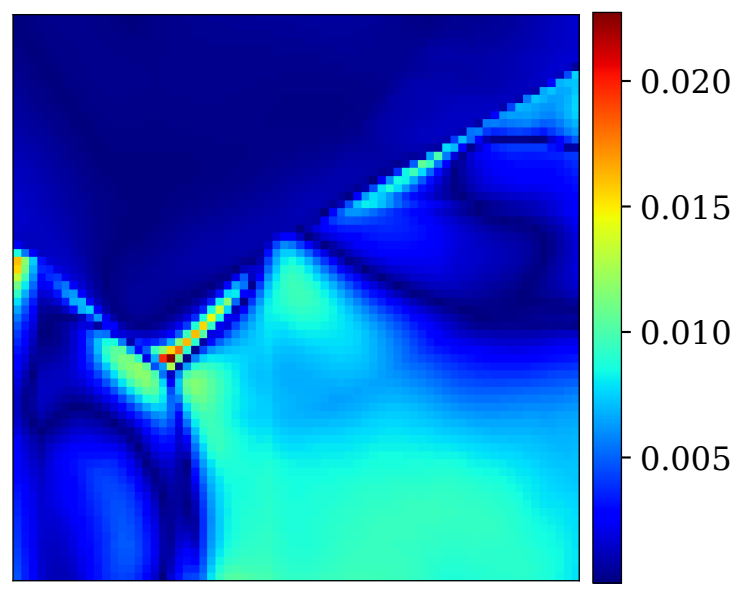

Supplement: supplementary_material [file gt_comp_top_98_(1, 0).pdf › EikonalENF_Jax-clean/experiments/fitting/figures/fwi_curvefault_a/test/gt_comp_top_98_(1, 0).pdf]

Velocity Field

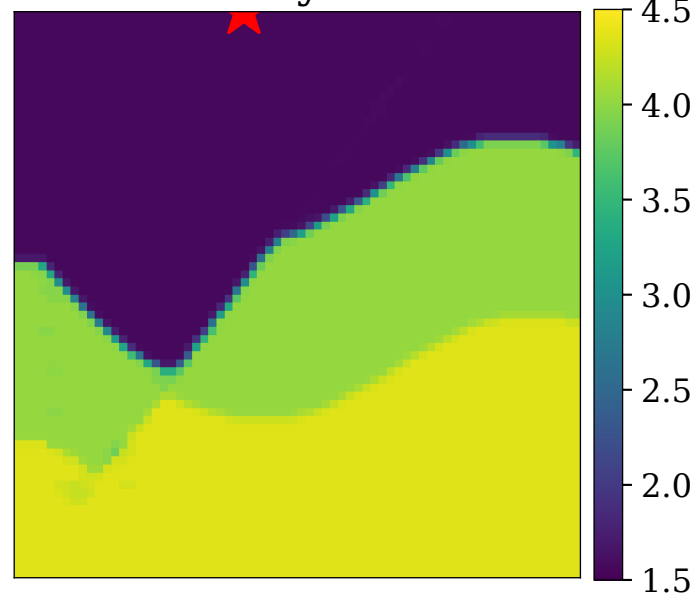

Ground Truth Time

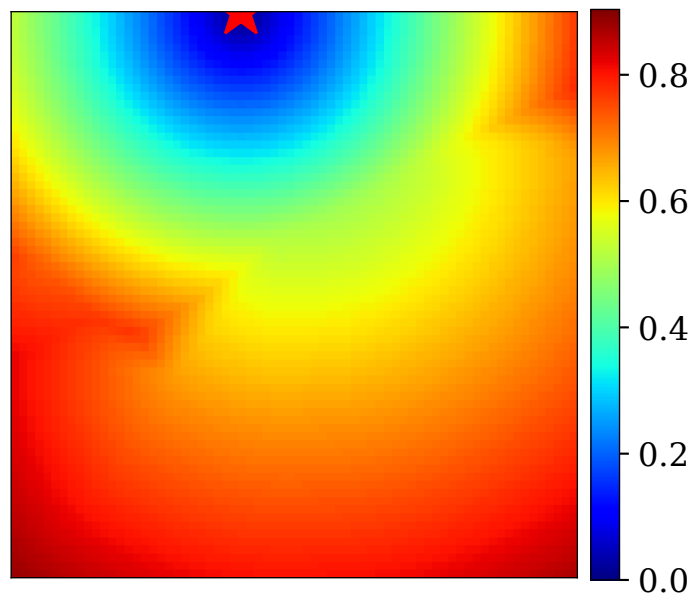

Predicted Time

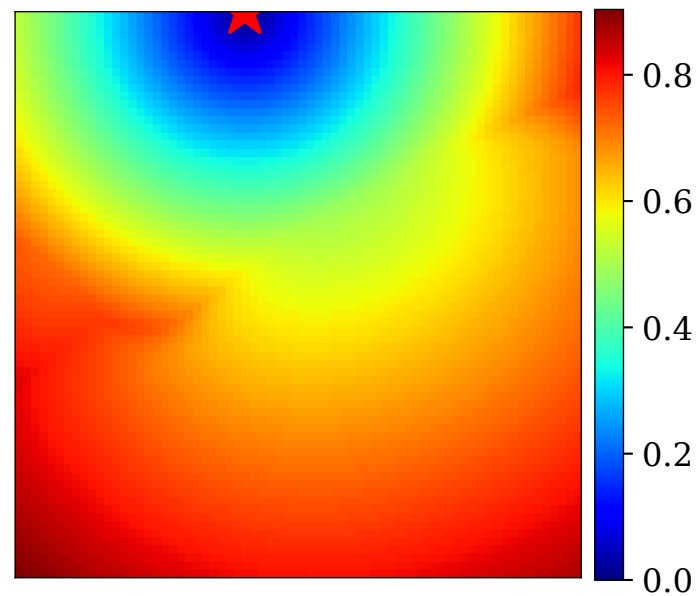

Absolute Error

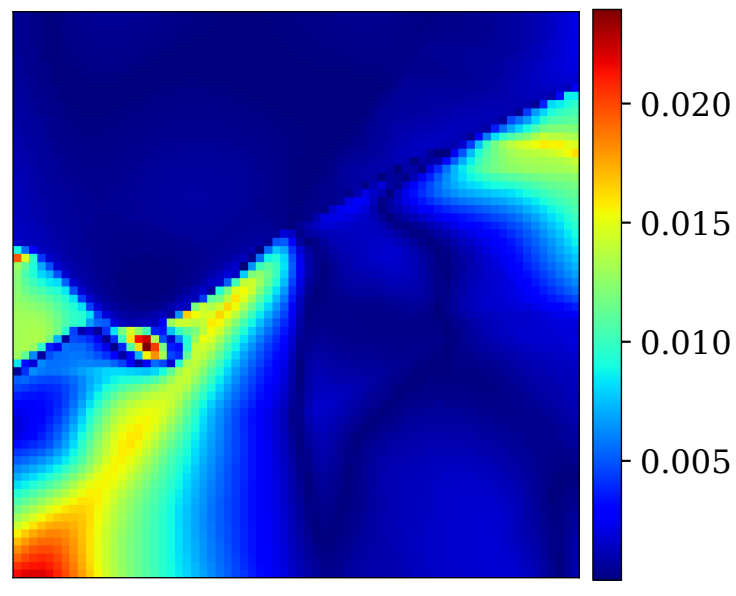

Supplement: supplementary_material [file gt_comp_top_98_(2, 0).pdf › EikonalENF_Jax-clean/experiments/fitting/figures/fwi_curvefault_a/test/gt_comp_top_98_(2, 0).pdf]

Velocity Field

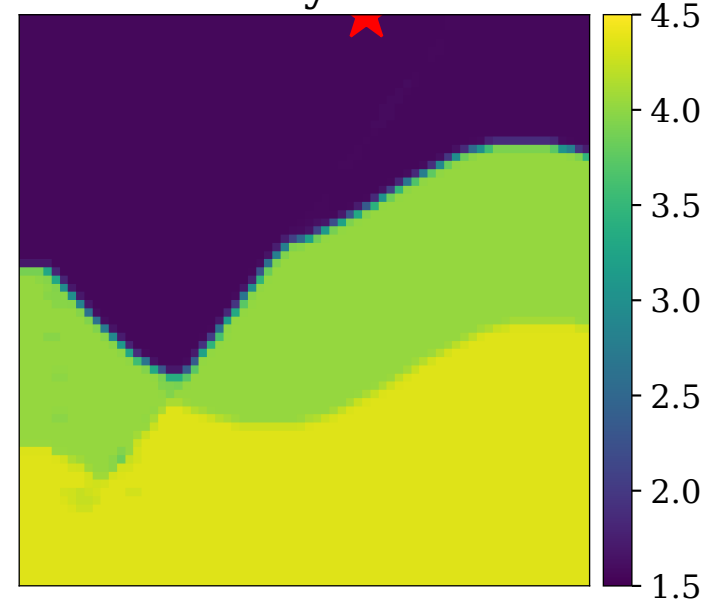

Ground Truth Time

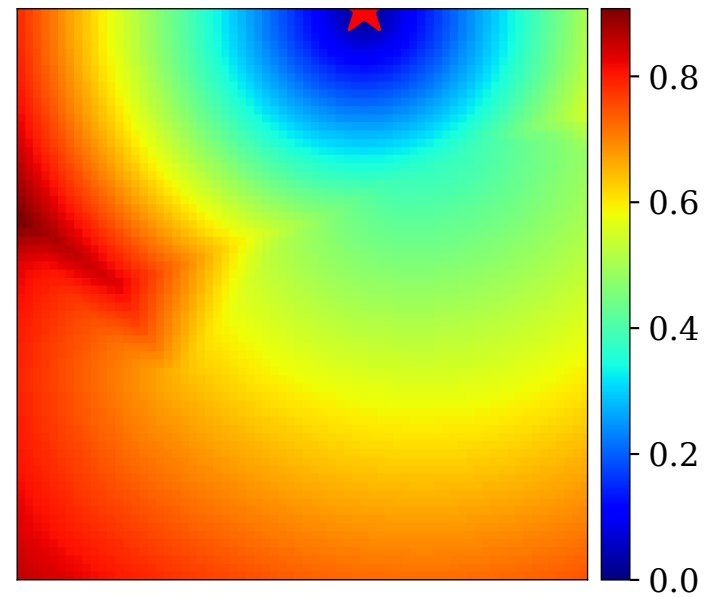

Predicted Time

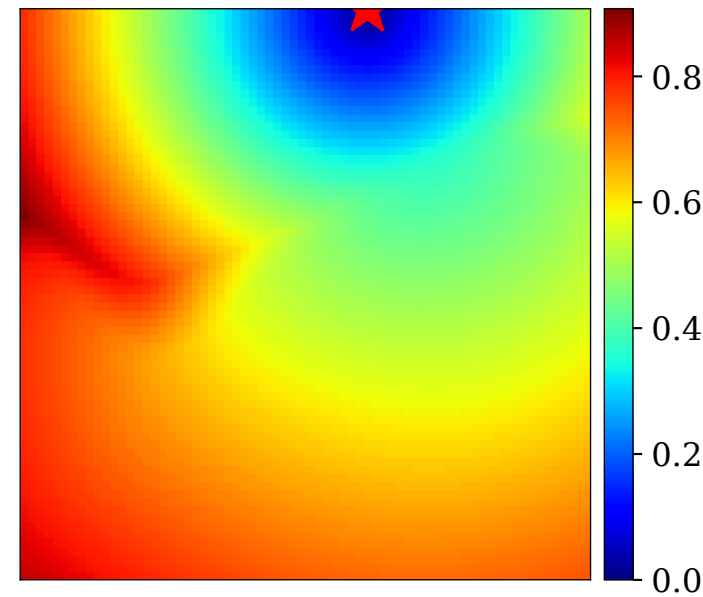

Absolute Error

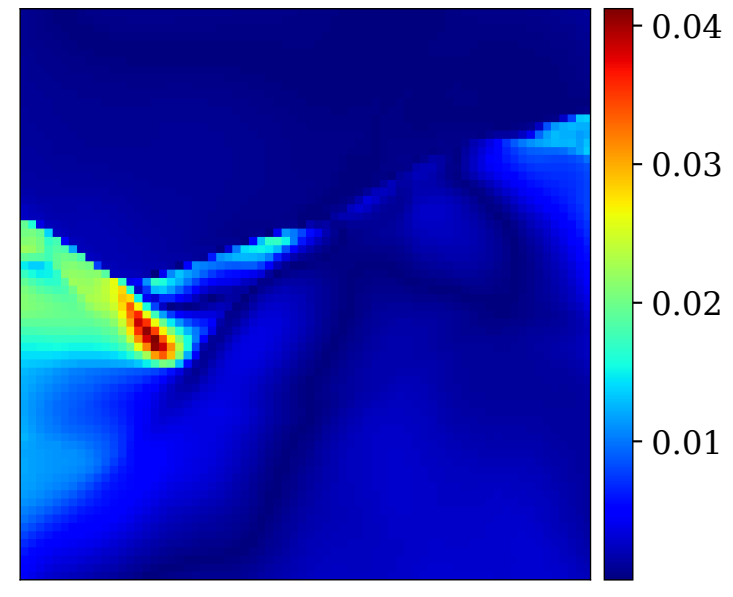

Supplement: supplementary_material [file gt_comp_top_98_(3, 0).pdf › EikonalENF_Jax-clean/experiments/fitting/figures/fwi_curvefault_a/test/gt_comp_top_98_(3, 0).pdf]

Velocity Field

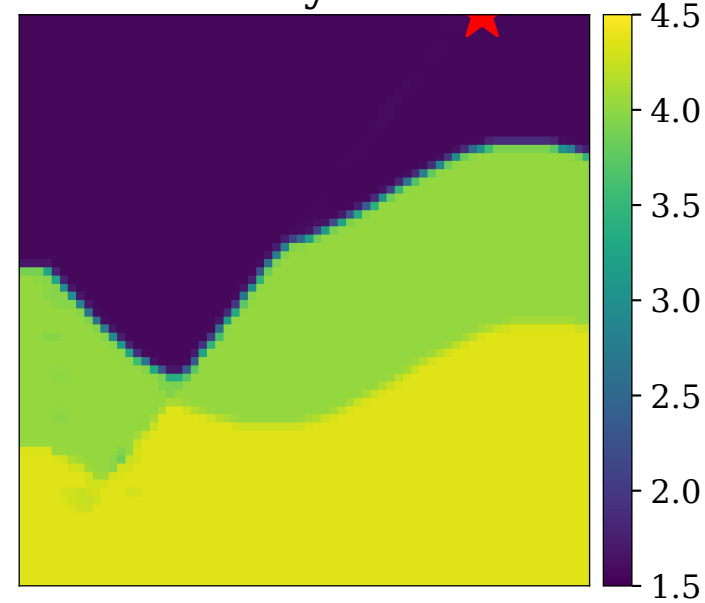

Ground Truth Time

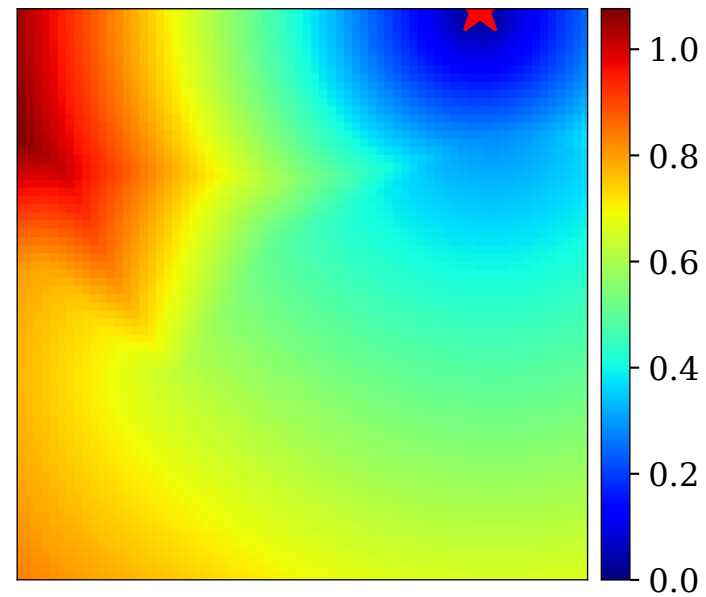

Predicted Time

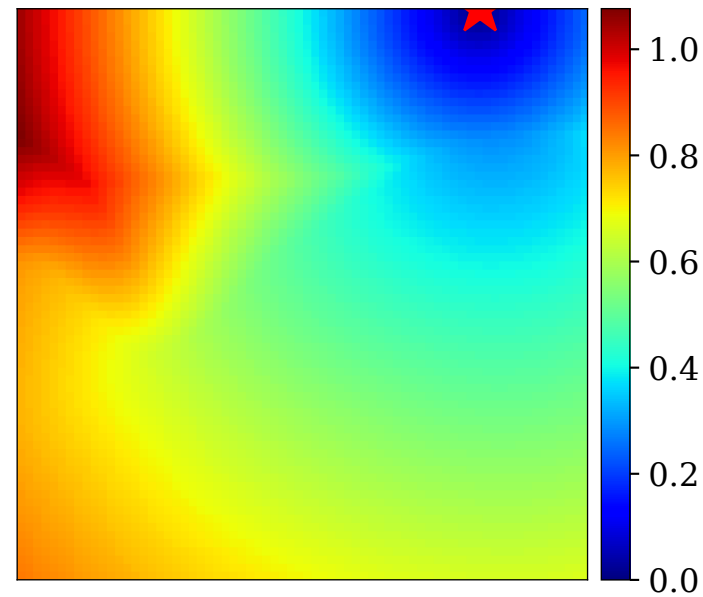

Absolute Error

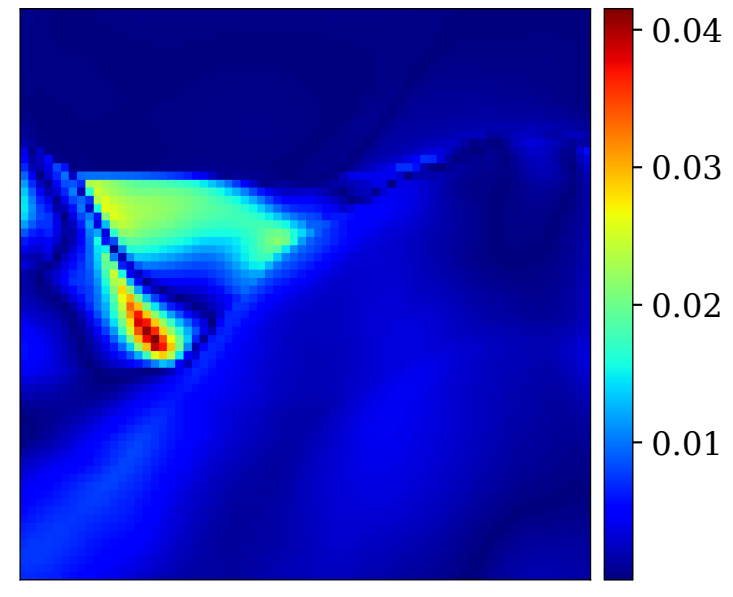

Supplement: supplementary_material [file gt_comp_top_98_(4, 0).pdf › EikonalENF_Jax-clean/experiments/fitting/figures/fwi_curvefault_a/test/gt_comp_top_98_(4, 0).pdf]

Velocity Field

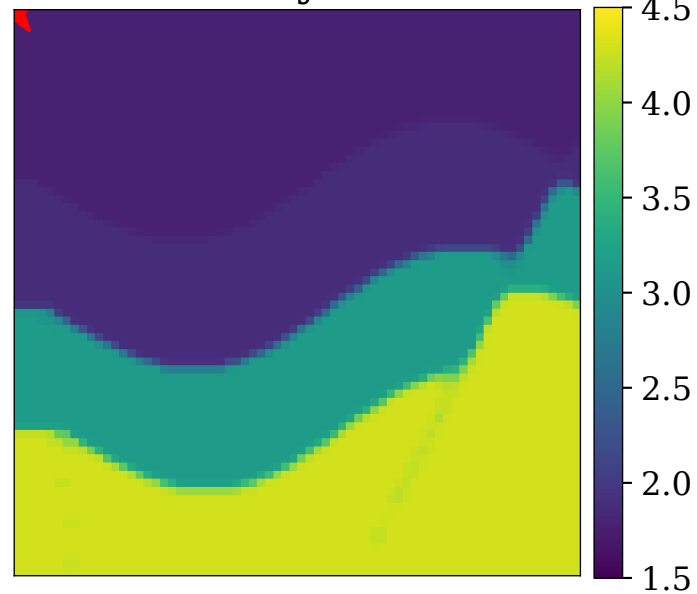

Ground Truth Time

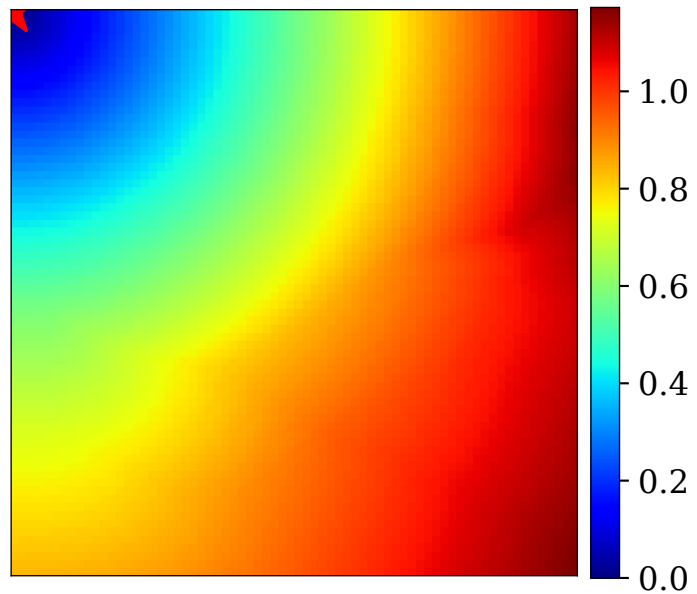

Predicted Time

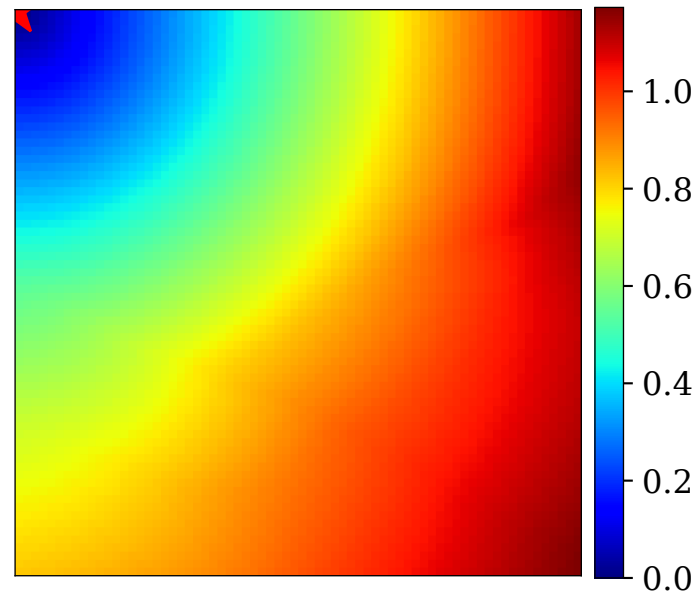

Absolute Error

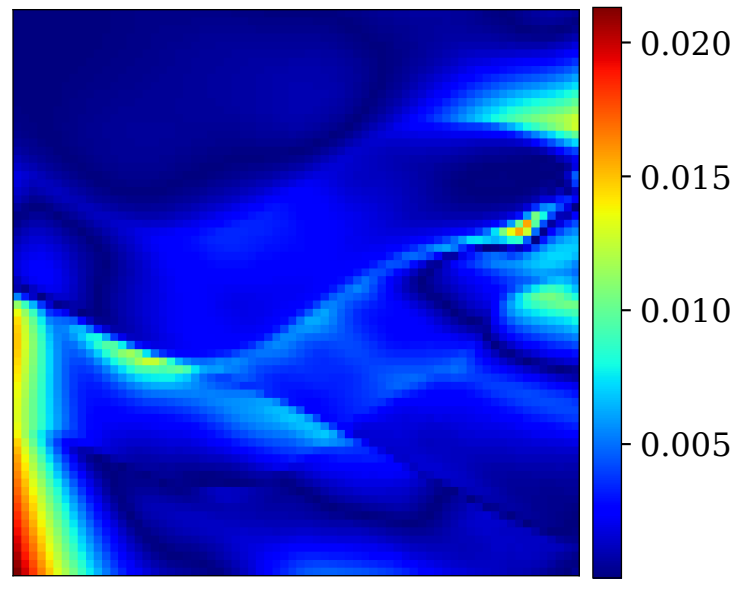

Supplement: supplementary_material [file gt_comp_top_99_(0, 0).pdf › EikonalENF_Jax-clean/experiments/fitting/figures/fwi_curvefault_a/test/gt_comp_top_99_(0, 0).pdf]

Velocity Field

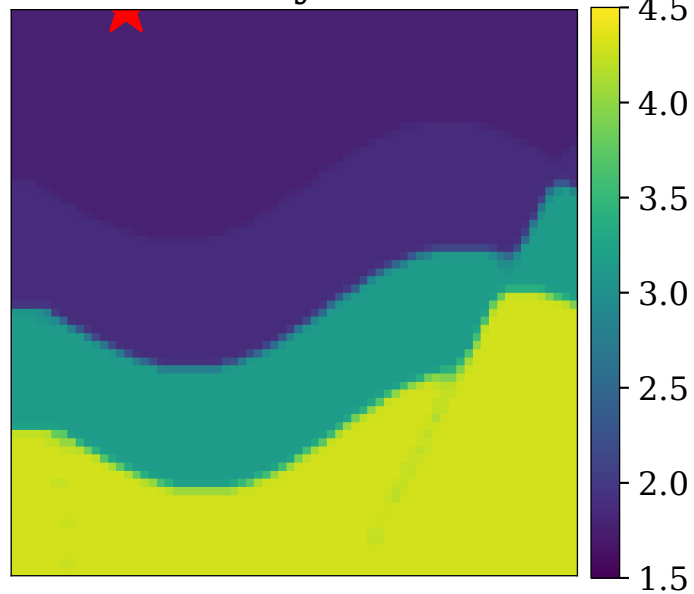

Ground Truth Time

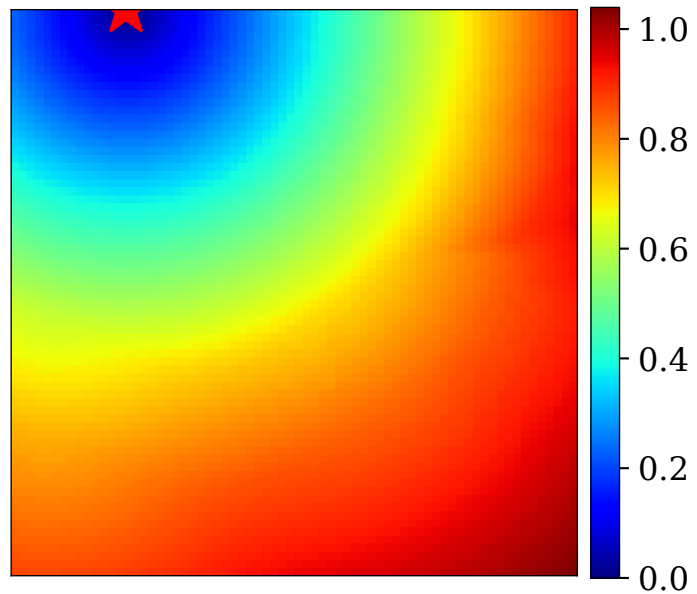

Predicted Time

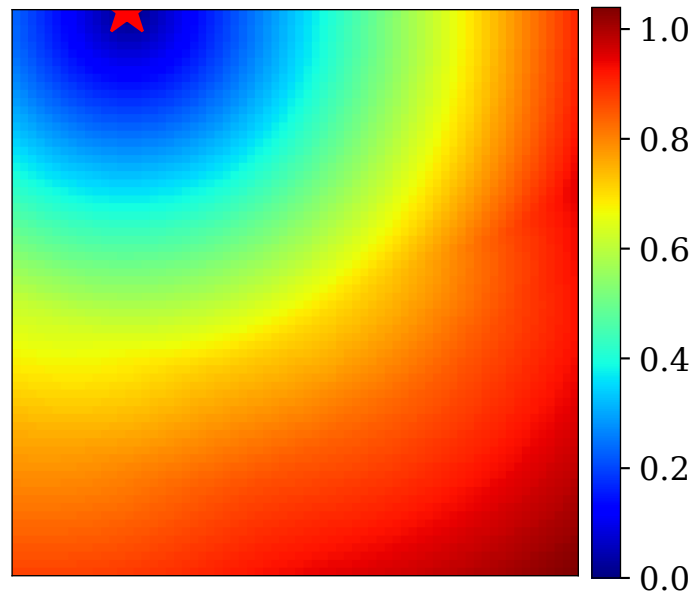

Absolute Error

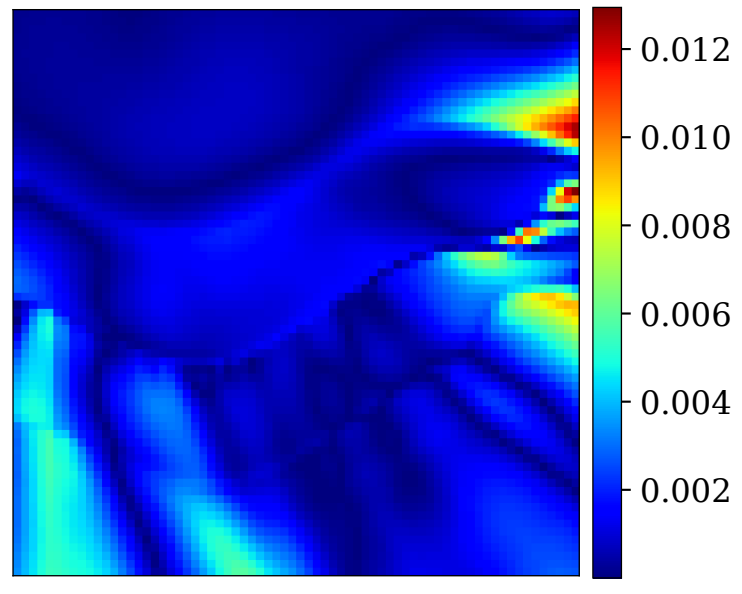

Supplement: supplementary_material [file gt_comp_top_99_(1, 0).pdf › EikonalENF_Jax-clean/experiments/fitting/figures/fwi_curvefault_a/test/gt_comp_top_99_(1, 0).pdf]

Velocity Field

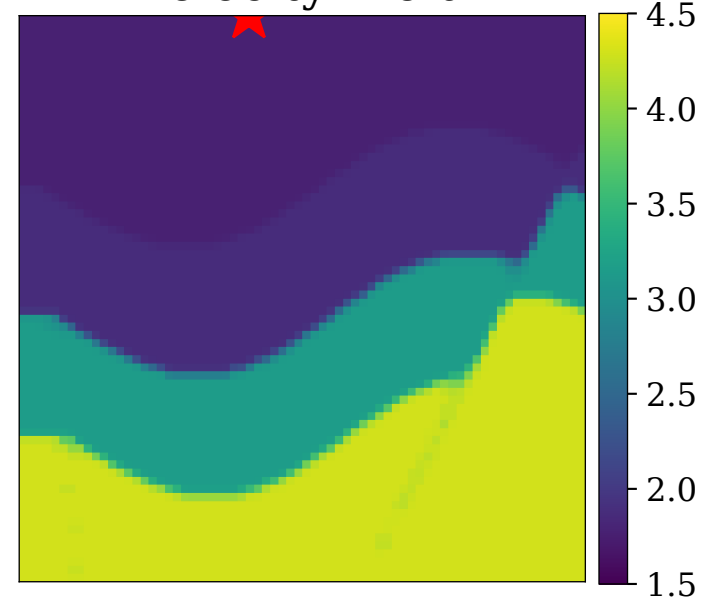

Ground Truth Time

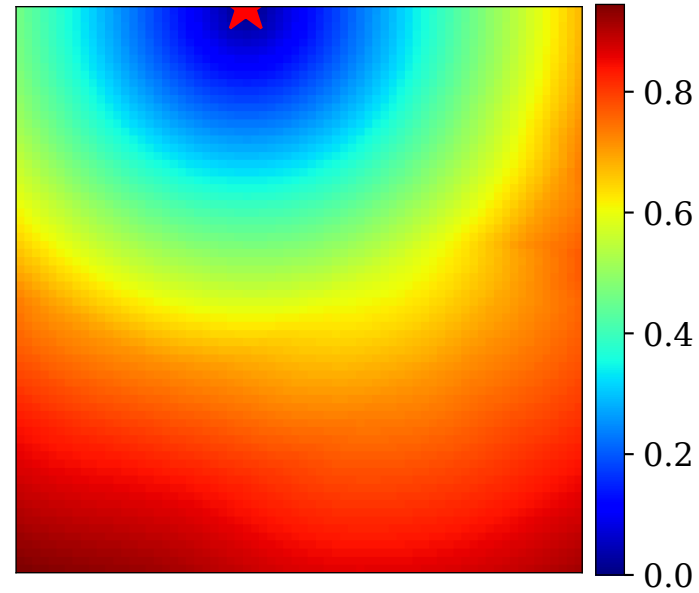

Predicted Time

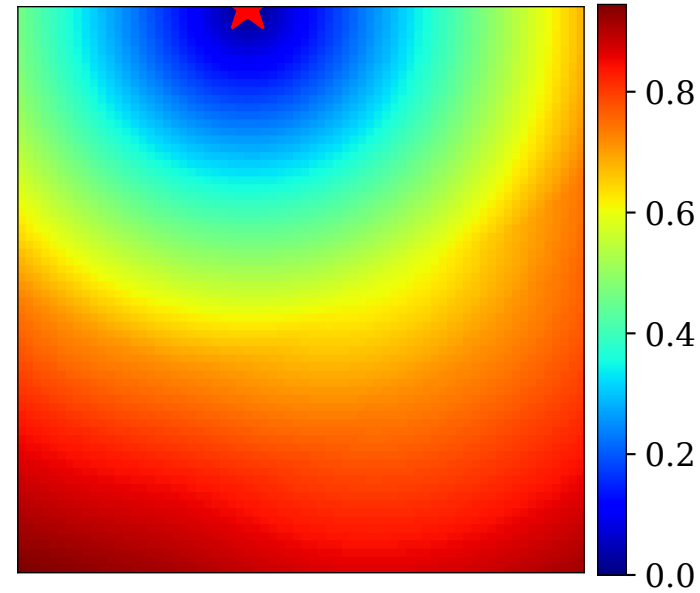

Absolute Error

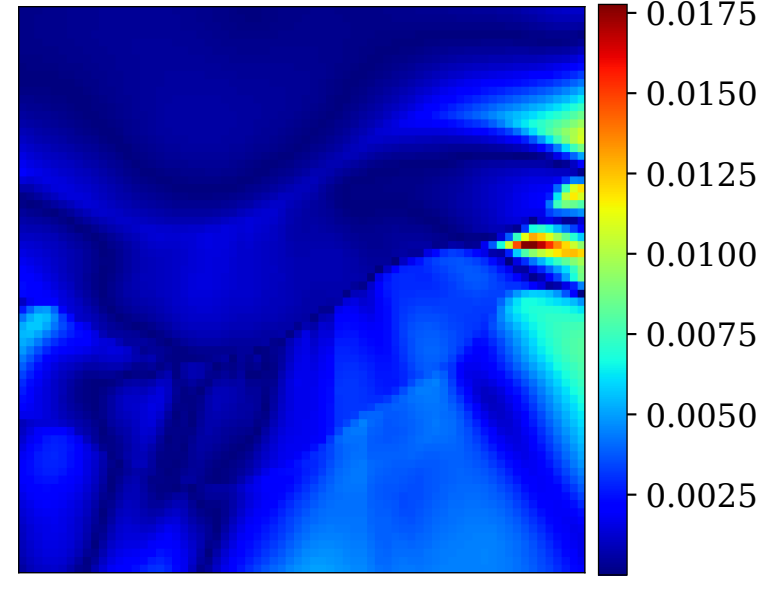

Supplement: supplementary_material [file gt_comp_top_99_(2, 0).pdf › EikonalENF_Jax-clean/experiments/fitting/figures/fwi_curvefault_a/test/gt_comp_top_99_(2, 0).pdf]

Velocity Field

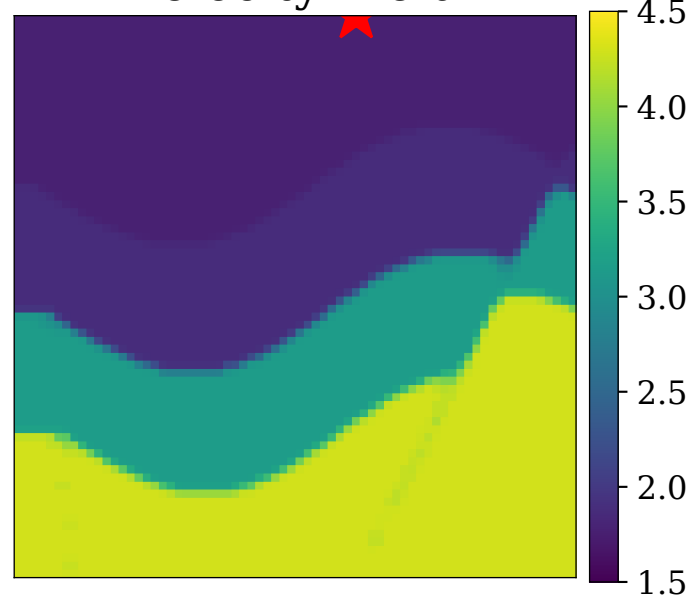

Ground Truth Time

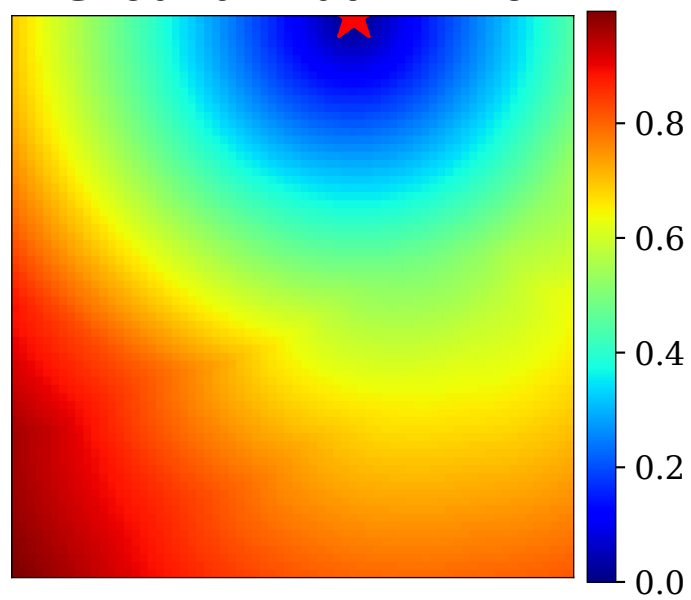

Predicted Time

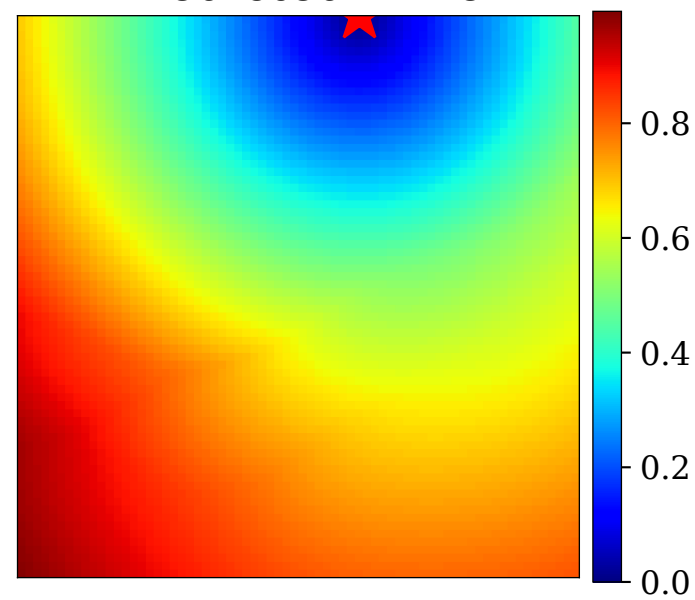

Absolute Error

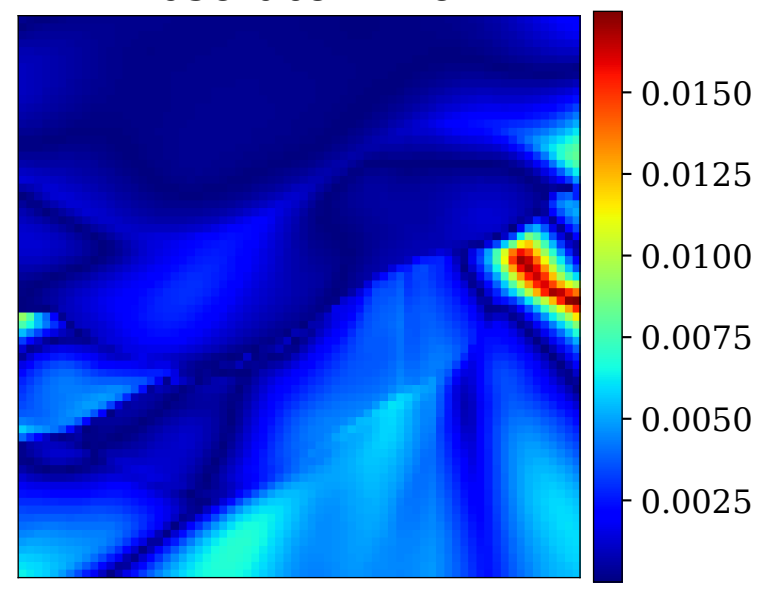

Supplement: supplementary_material [file gt_comp_top_99_(3, 0).pdf › EikonalENF_Jax-clean/experiments/fitting/figures/fwi_curvefault_a/test/gt_comp_top_99_(3, 0).pdf]

Velocity Field

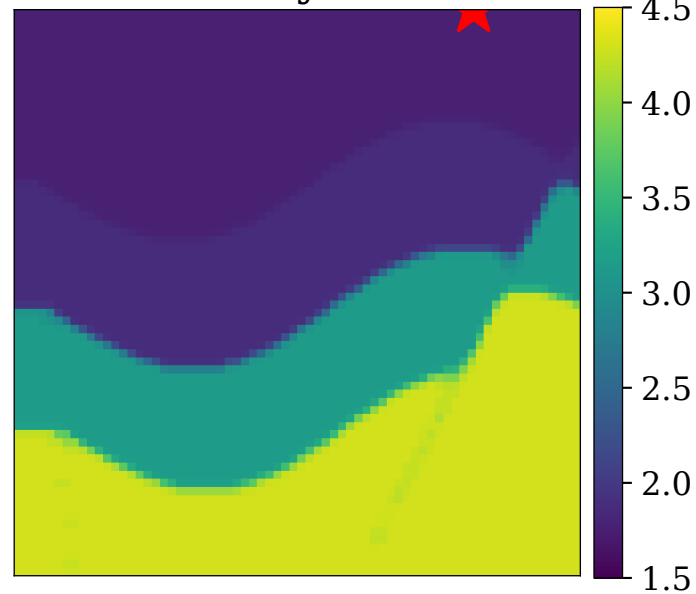

Ground Truth Time

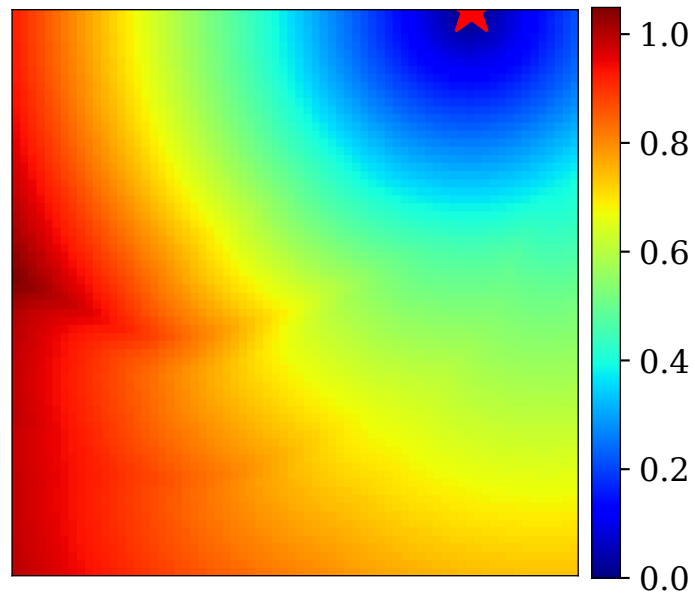

Predicted Time

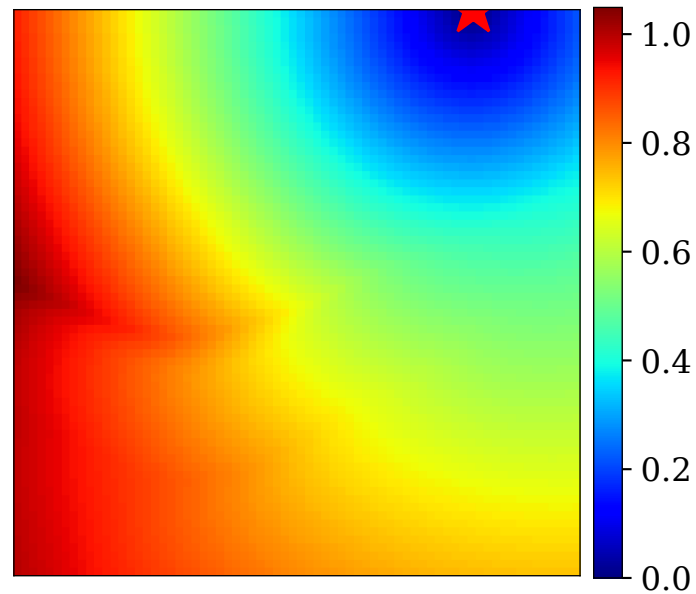

Absolute Error

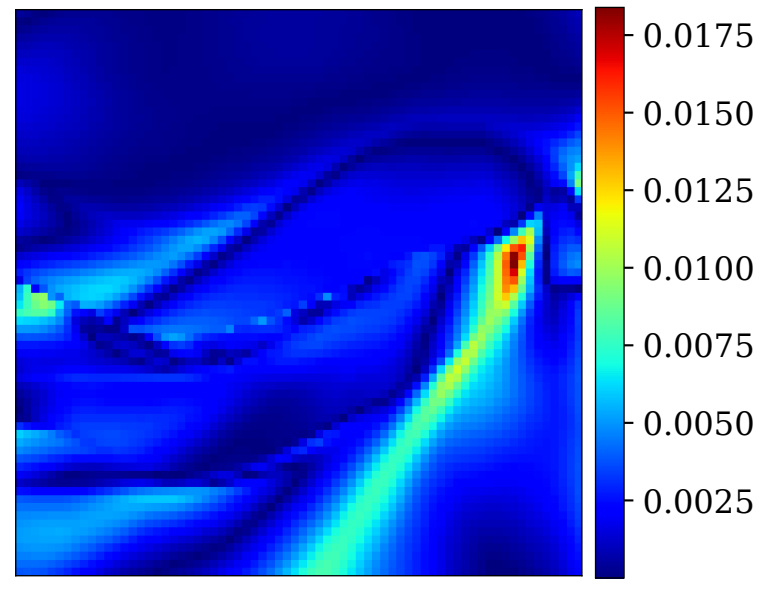

Supplement: supplementary_material [file gt_comp_top_99_(4, 0).pdf › EikonalENF_Jax-clean/experiments/fitting/figures/fwi_curvefault_a/test/gt_comp_top_99_(4, 0).pdf]

Velocity Field

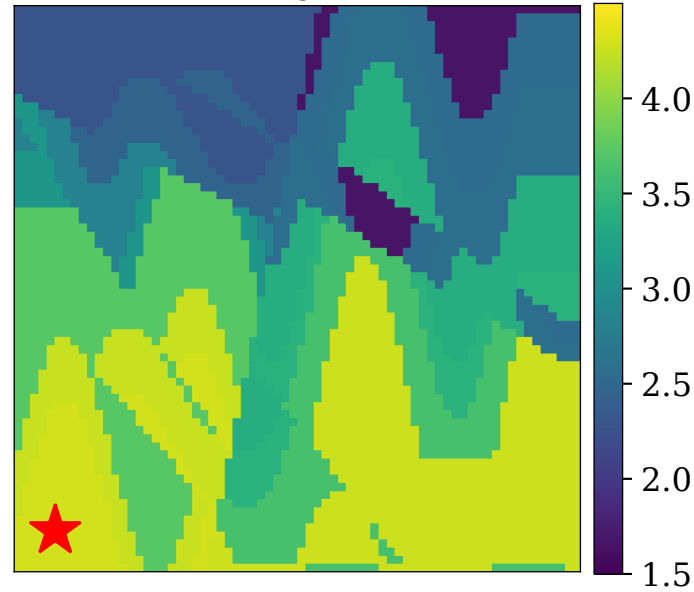

Ground Truth Time

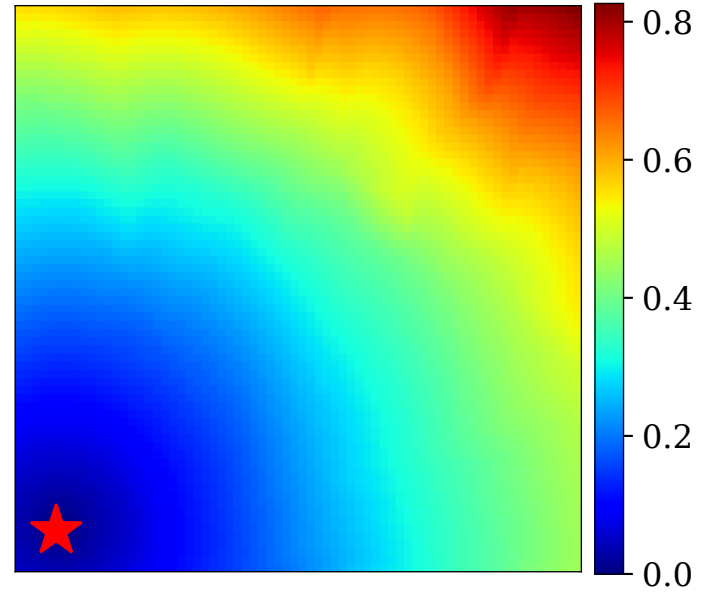

Predicted Time

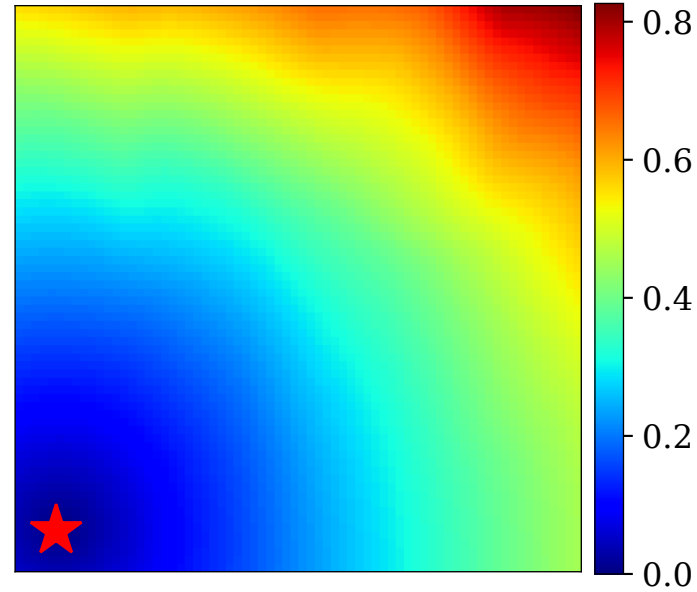

Absolute Error

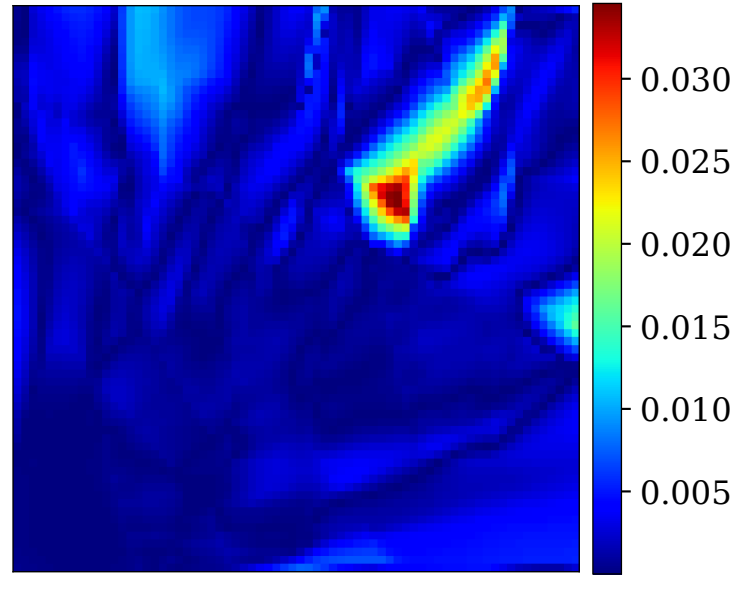

Supplement: supplementary_material [file gt_comp_full_98_(1, 1).pdf › EikonalENF_Jax-clean/experiments/fitting/figures/fwi_curvefault_b/test/gt_comp_full_98_(1, 1).pdf]

Velocity Field

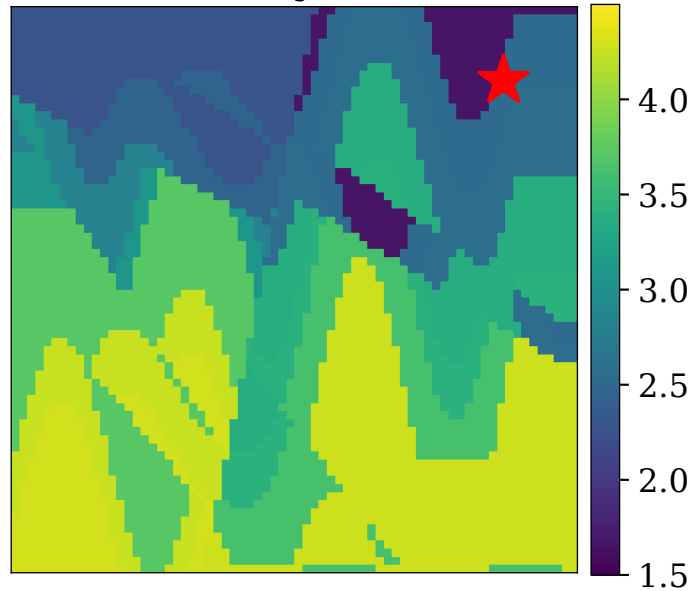

Ground Truth Time

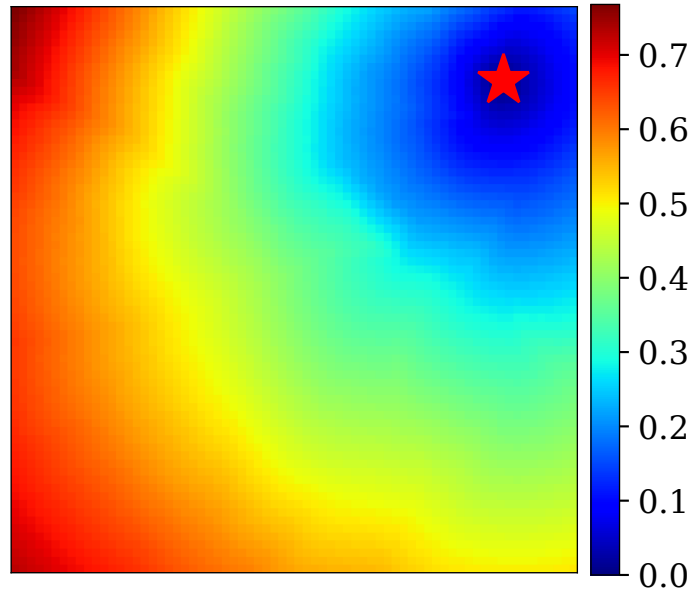

Predicted Time

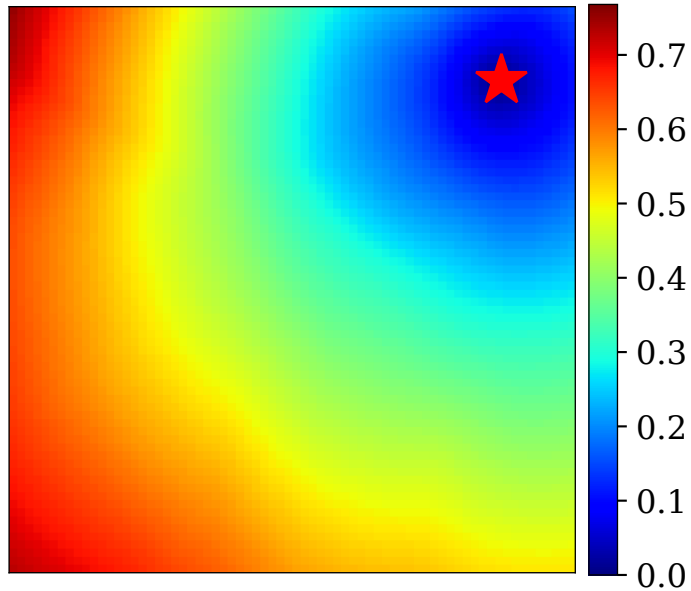

Absolute Error

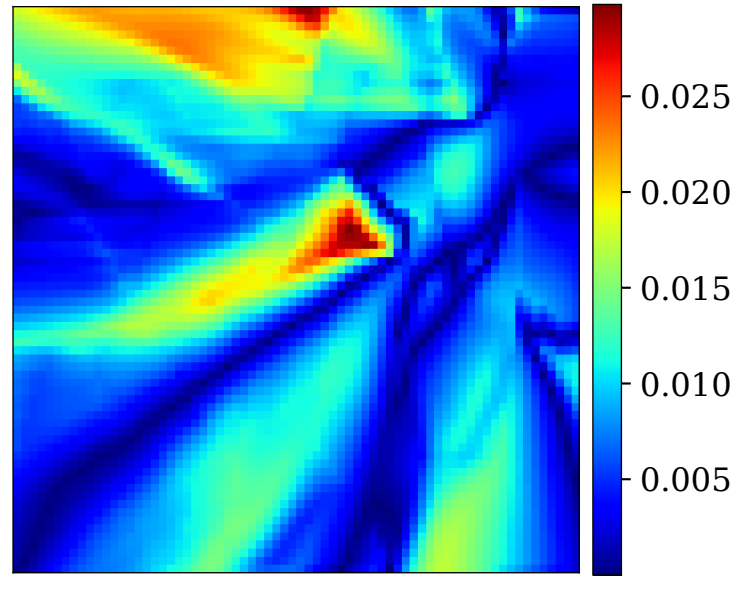

Supplement: supplementary_material [file gt_comp_full_98_(12, 12).pdf › EikonalENF_Jax-clean/experiments/fitting/figures/fwi_curvefault_b/test/gt_comp_full_98_(12, 12).pdf]

Velocity Field

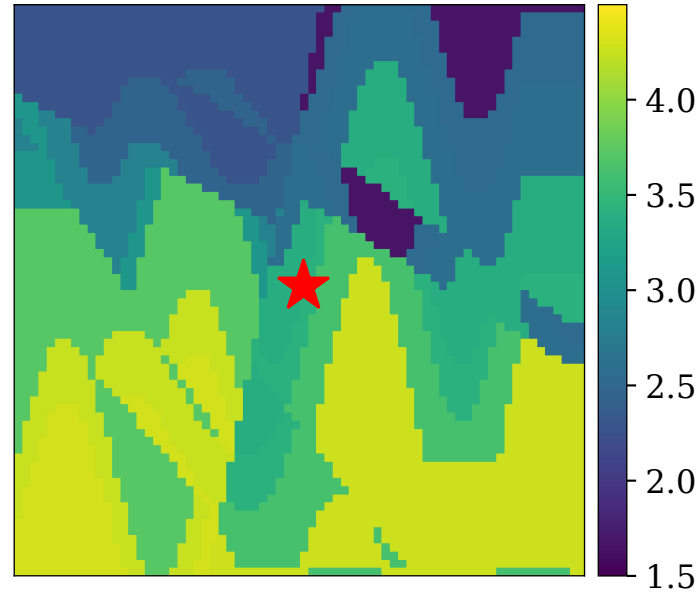

Ground Truth Time

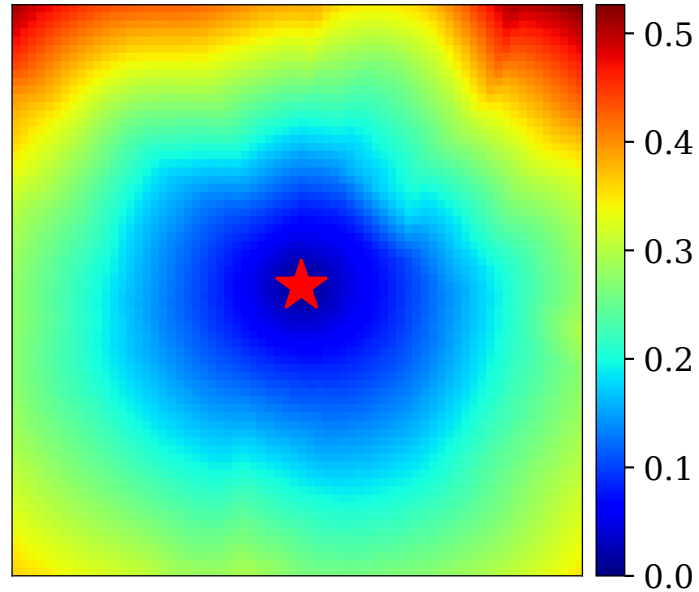

Predicted Time

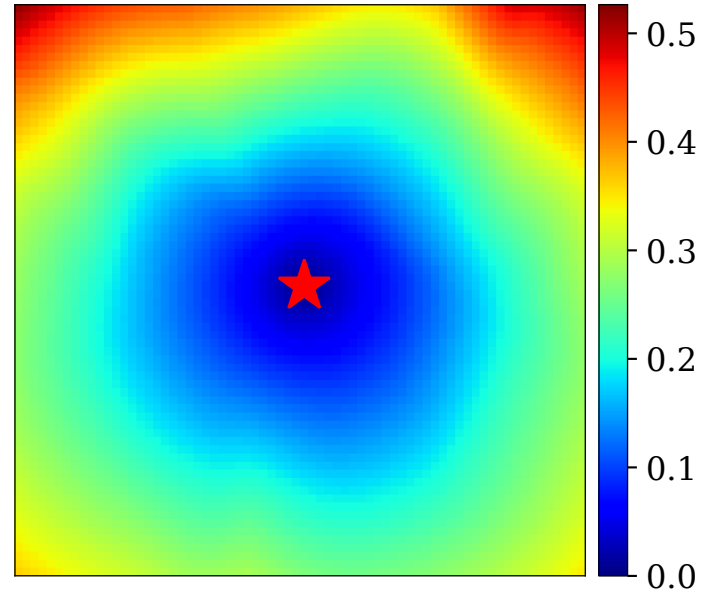

Absolute Error

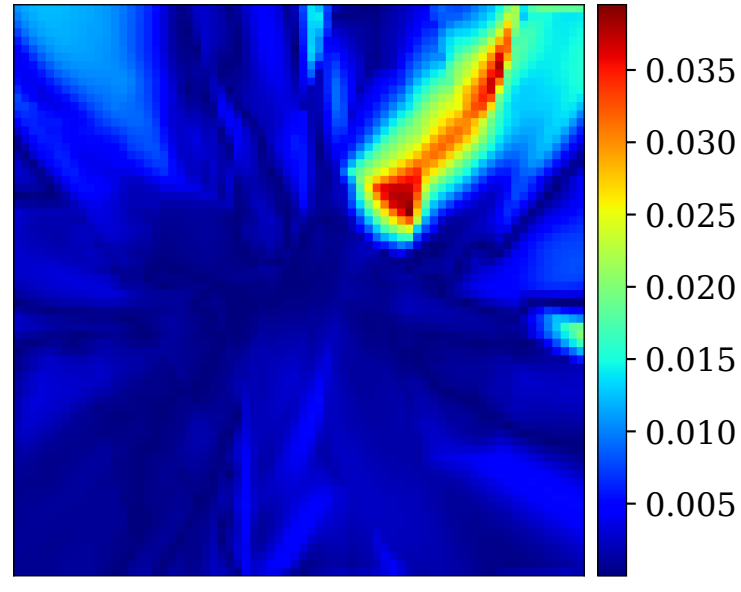

Supplement: supplementary_material [file gt_comp_full_98_(7, 7).pdf › EikonalENF_Jax-clean/experiments/fitting/figures/fwi_curvefault_b/test/gt_comp_full_98_(7, 7).pdf]

Velocity Field

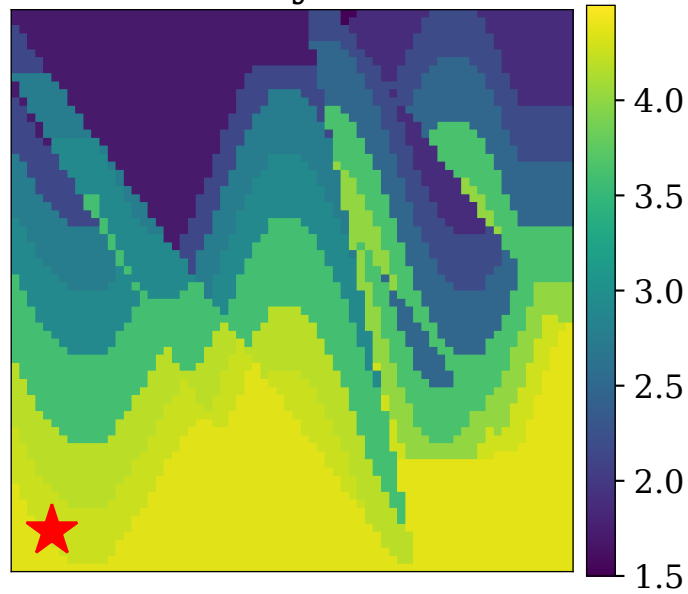

Ground Truth Time

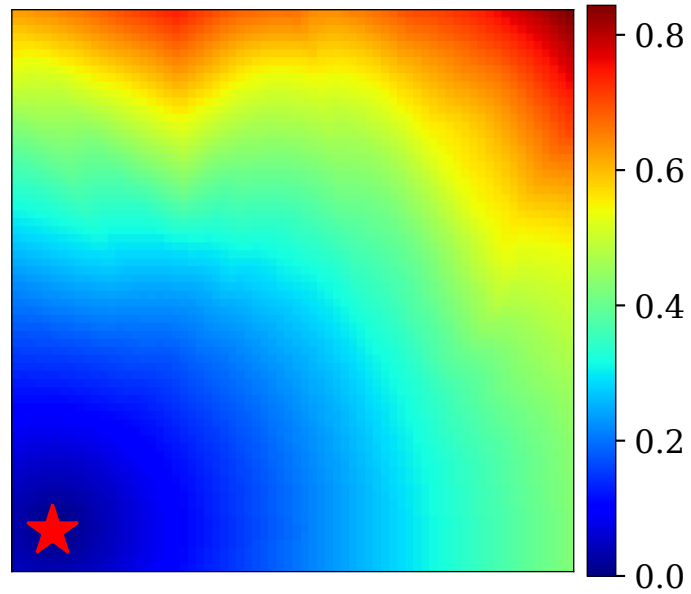

Predicted Time

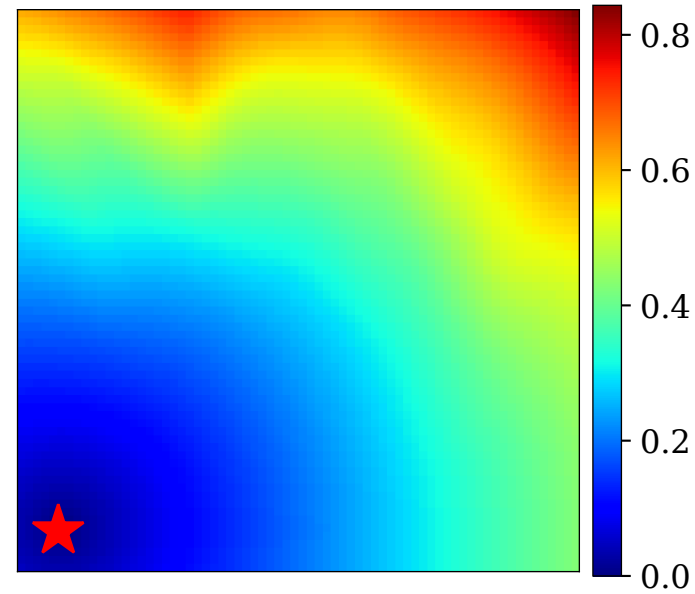

Absolute Error

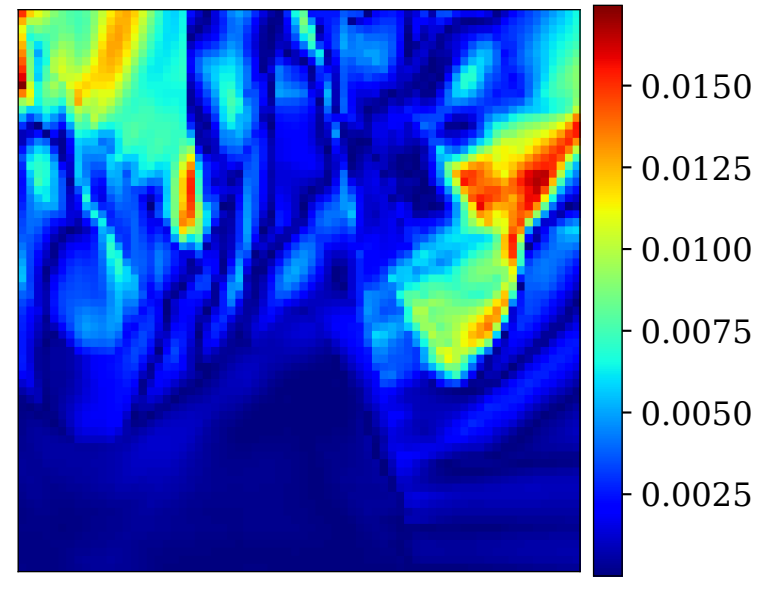

Supplement: supplementary_material [file gt_comp_full_99_(1, 1).pdf › EikonalENF_Jax-clean/experiments/fitting/figures/fwi_curvefault_b/test/gt_comp_full_99_(1, 1).pdf]

Velocity Field

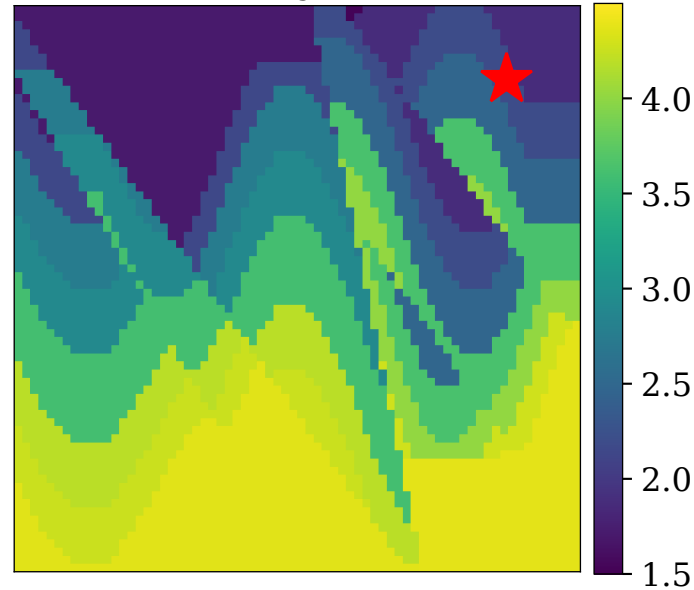

Ground Truth Time

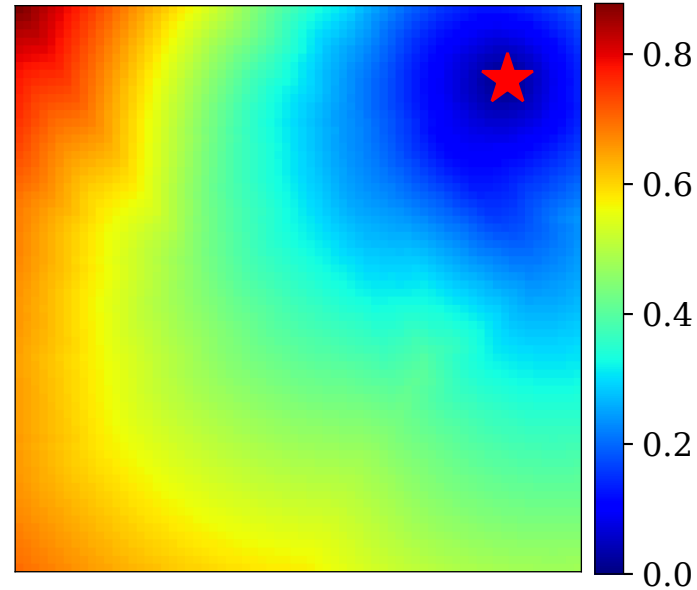

Predicted Time

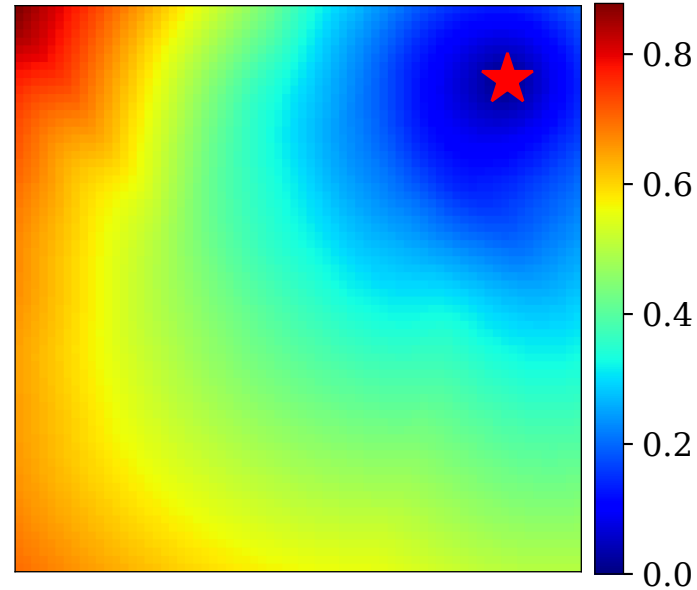

Absolute Error

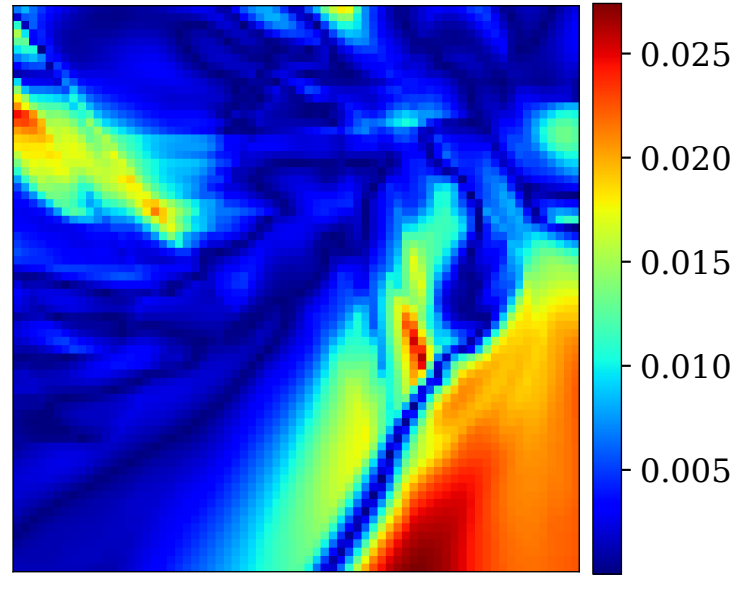

Supplement: supplementary_material [file gt_comp_full_99_(12, 12).pdf › EikonalENF_Jax-clean/experiments/fitting/figures/fwi_curvefault_b/test/gt_comp_full_99_(12, 12).pdf]

Velocity Field

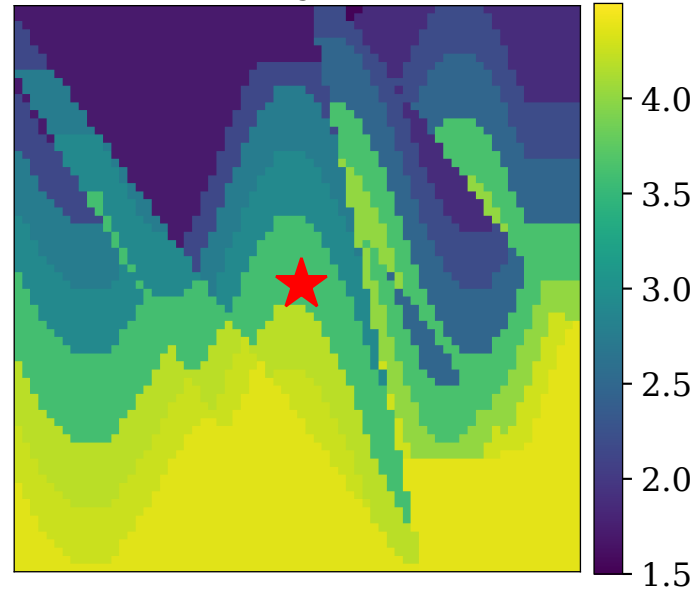

Ground Truth Time

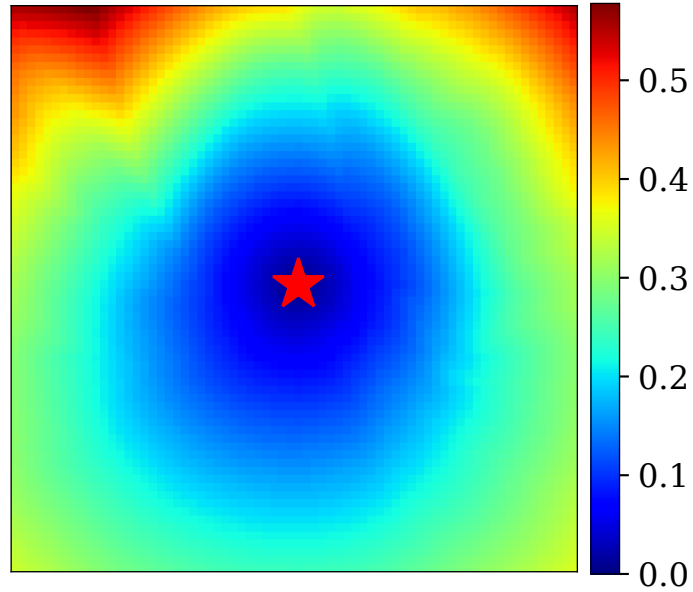

Predicted Time

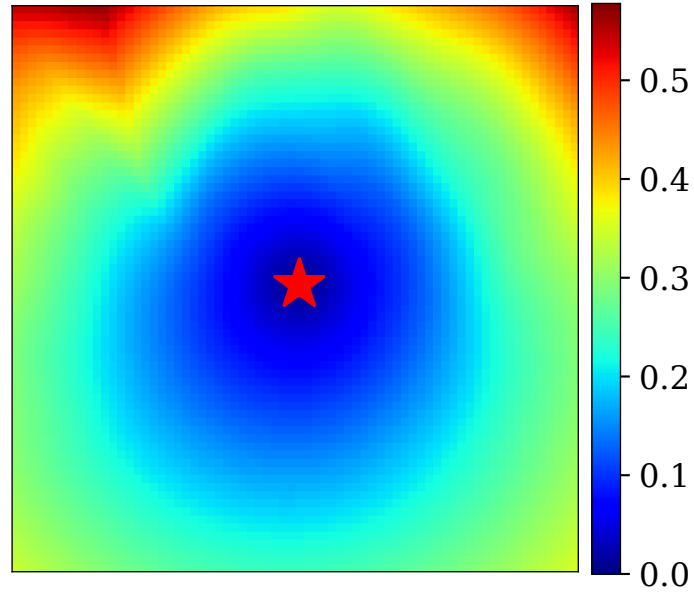

Absolute Error

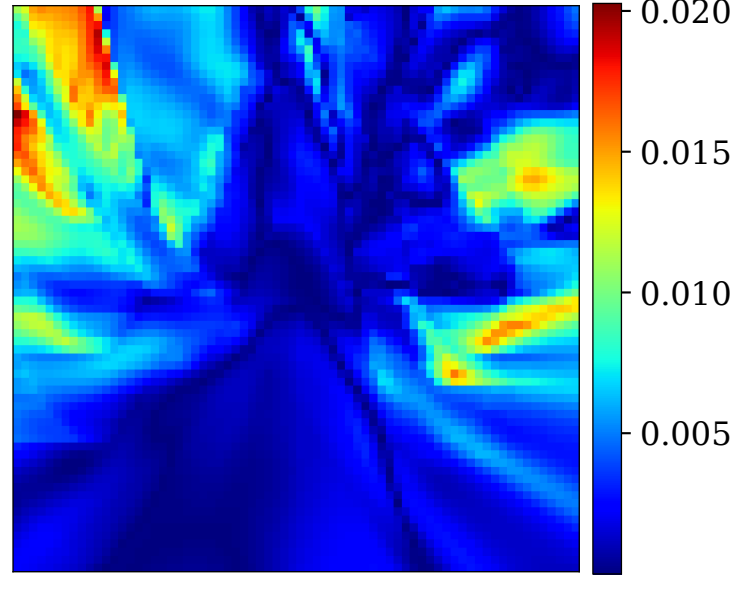

Supplement: supplementary_material [file gt_comp_full_99_(7, 7).pdf › EikonalENF_Jax-clean/experiments/fitting/figures/fwi_curvefault_b/test/gt_comp_full_99_(7, 7).pdf]

Velocity Field

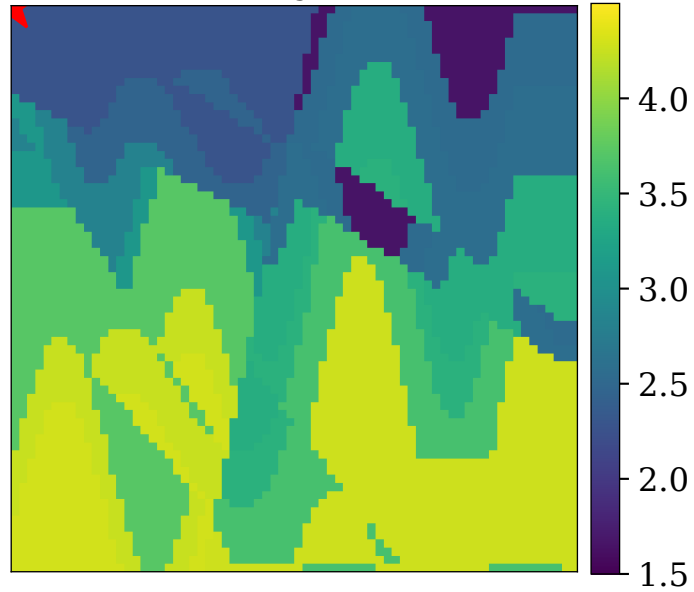

Ground Truth Time

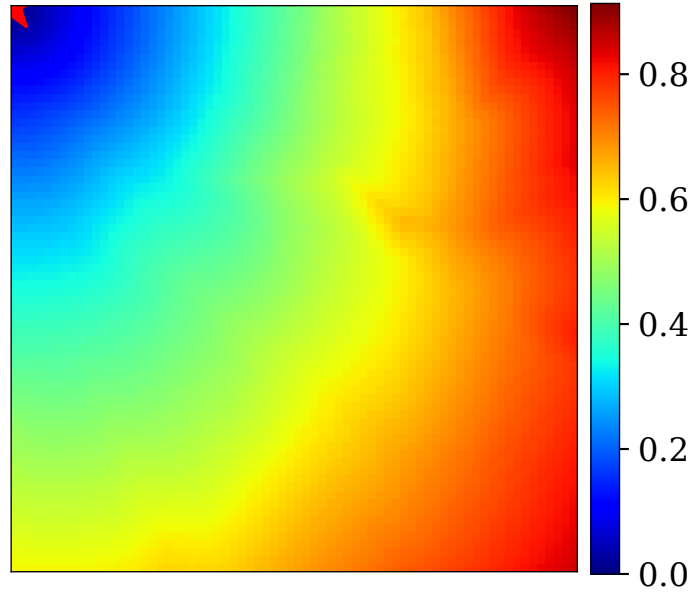

Predicted Time

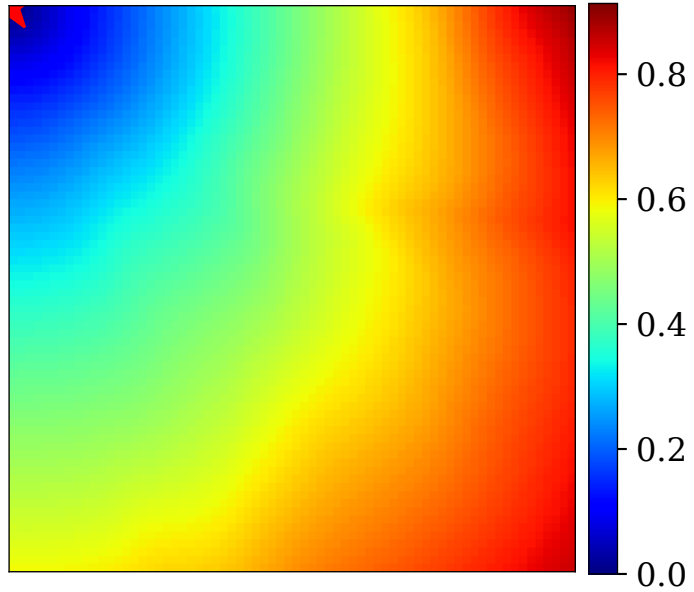

Absolute Error

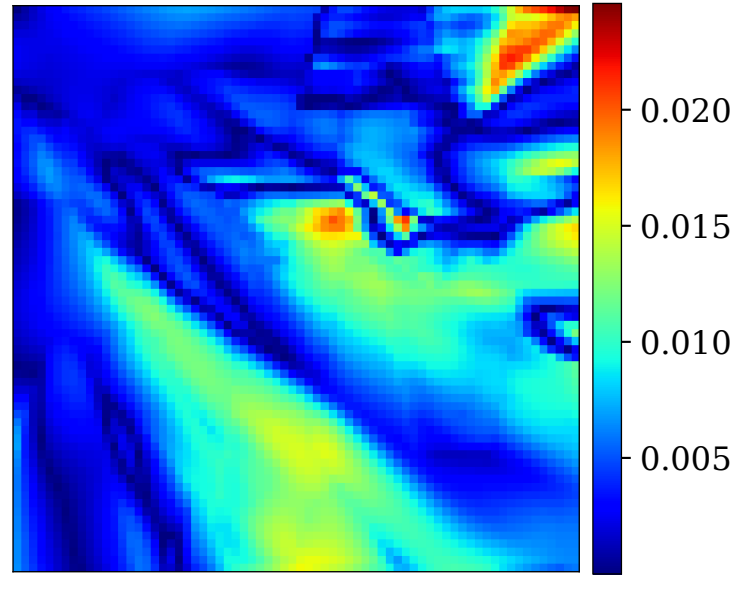

Supplement: supplementary_material [file gt_comp_top_98_(0, 0).pdf › EikonalENF_Jax-clean/experiments/fitting/figures/fwi_curvefault_b/test/gt_comp_top_98_(0, 0).pdf]

Velocity Field

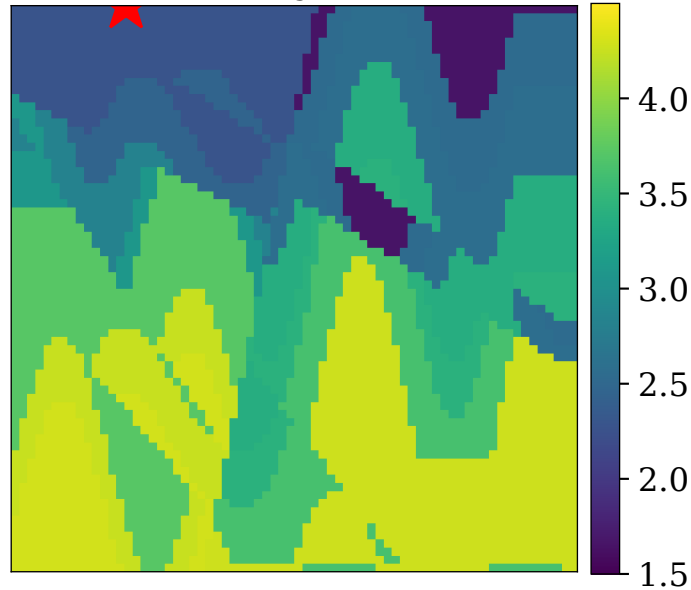

Ground Truth Time

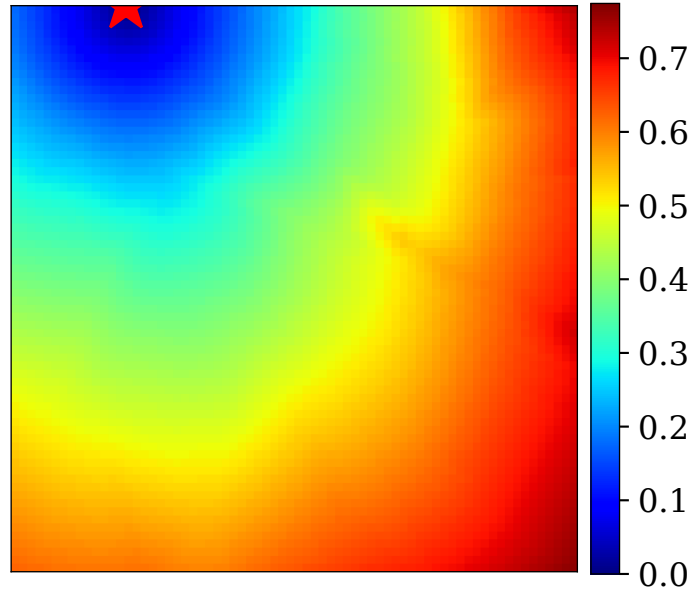

Predicted Time

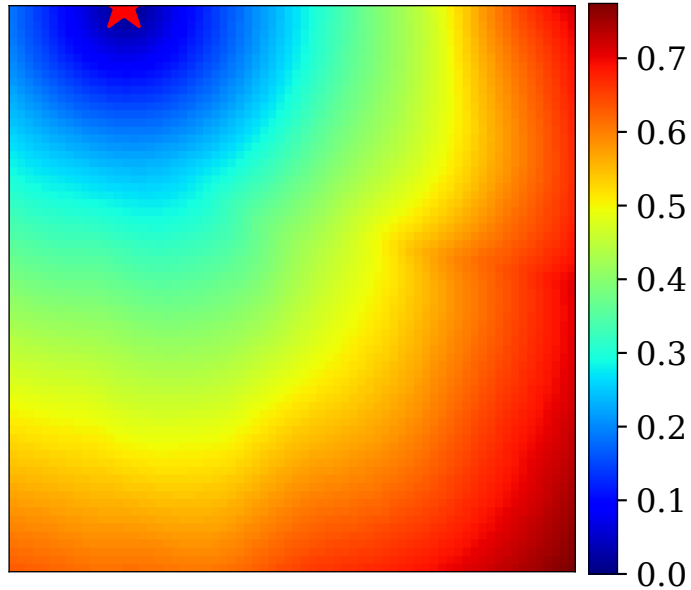

Absolute Error

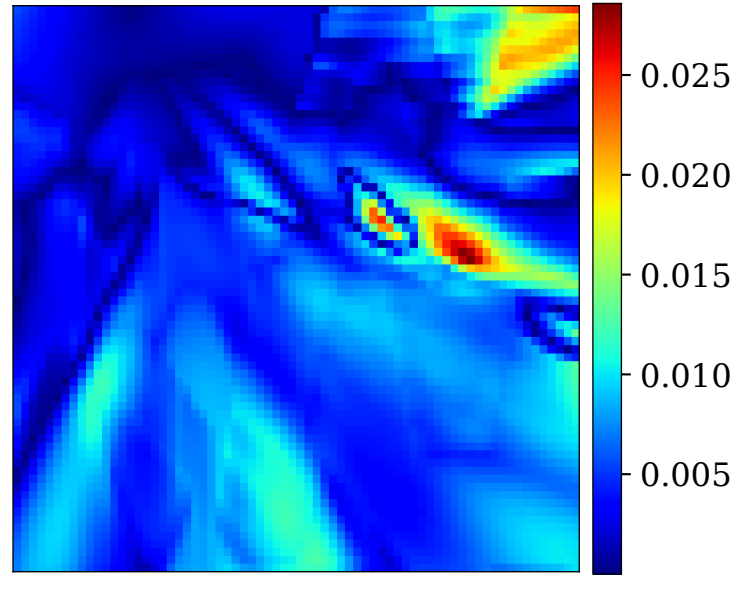

Supplement: supplementary_material [file gt_comp_top_98_(1, 0).pdf › EikonalENF_Jax-clean/experiments/fitting/figures/fwi_curvefault_b/test/gt_comp_top_98_(1, 0).pdf]

Velocity Field

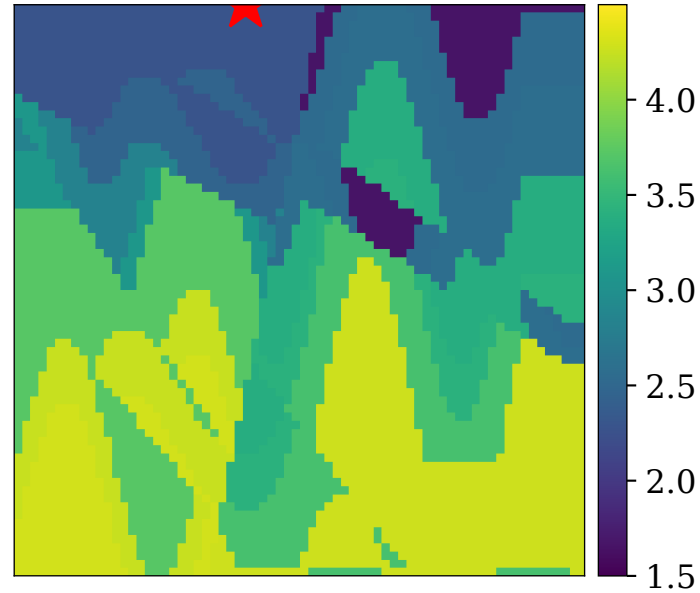

Ground Truth Time

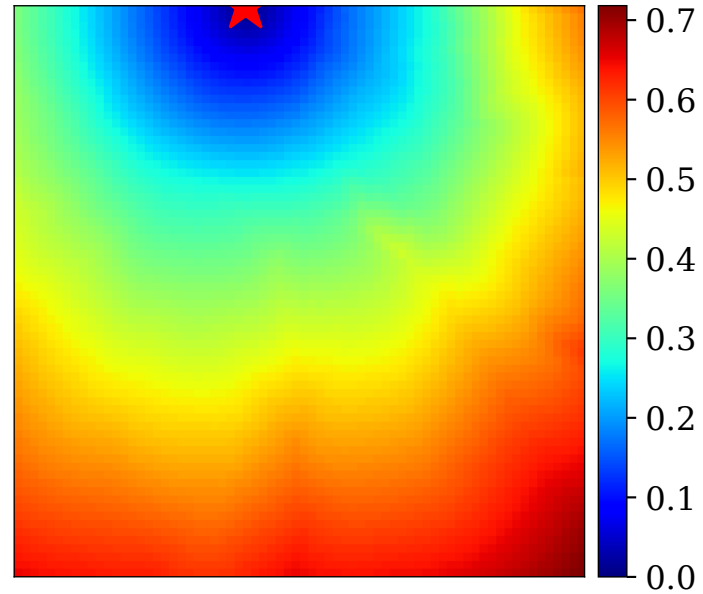

Predicted Time

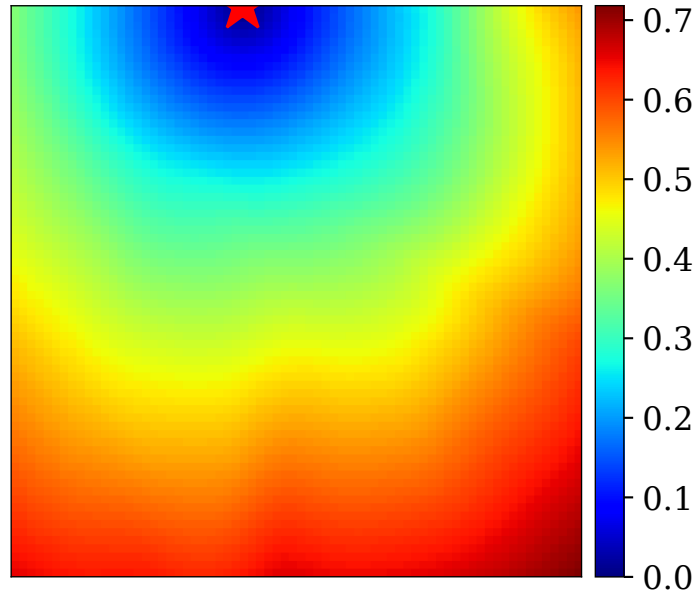

Absolute Error

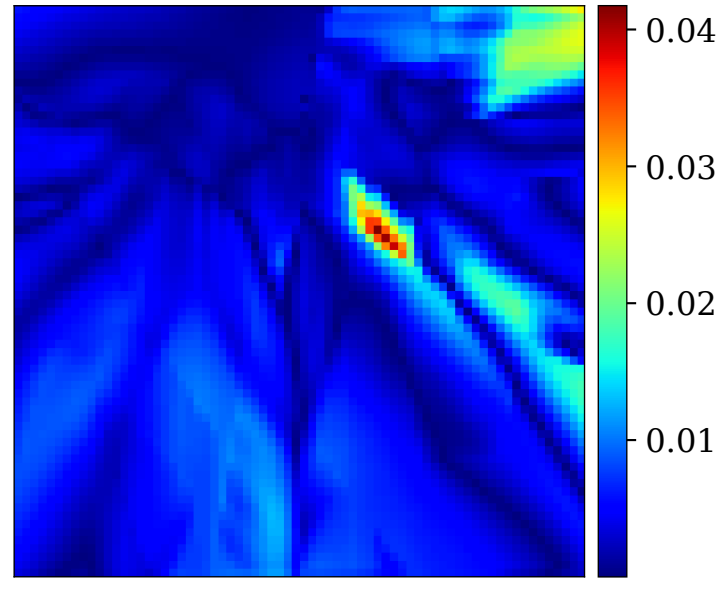

Supplement: supplementary_material [file gt_comp_top_98_(2, 0).pdf › EikonalENF_Jax-clean/experiments/fitting/figures/fwi_curvefault_b/test/gt_comp_top_98_(2, 0).pdf]

Velocity Field

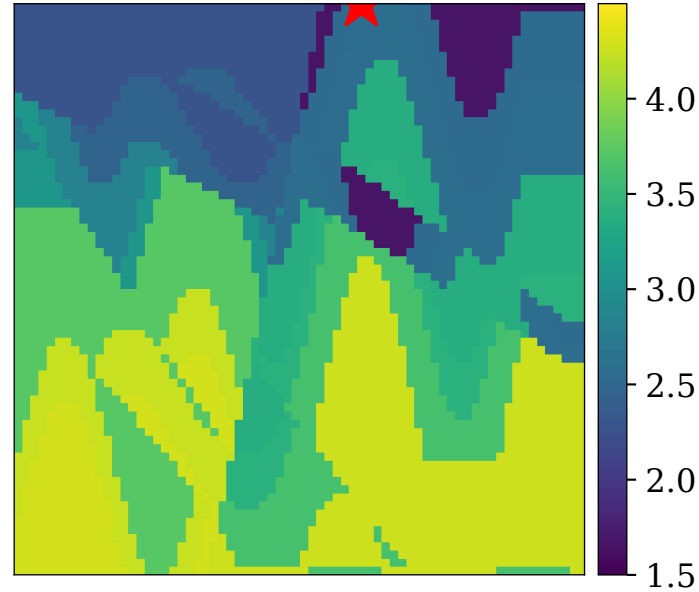

Ground Truth Time

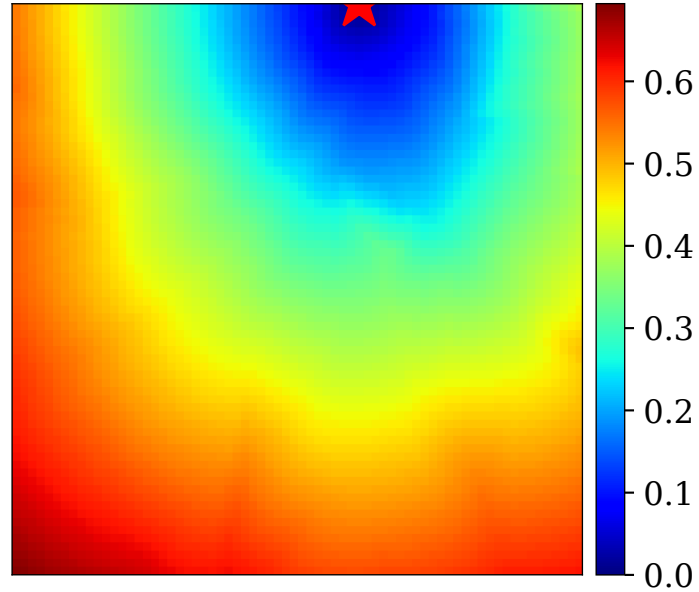

Predicted Time

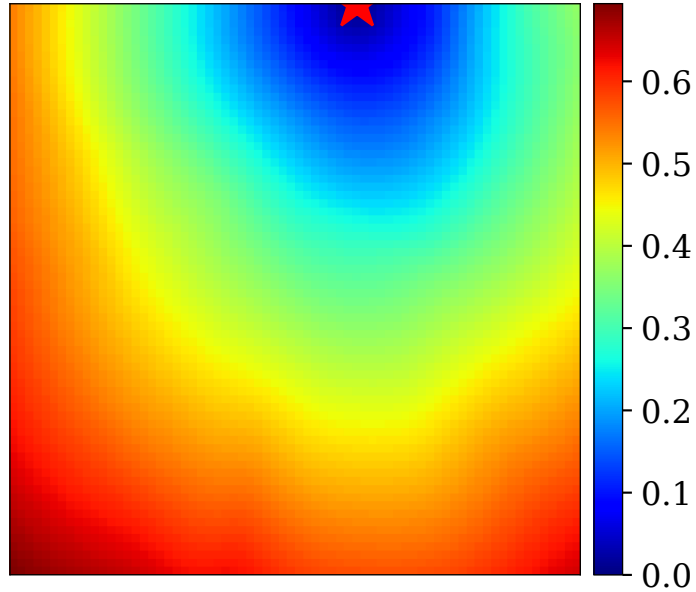

Absolute Error

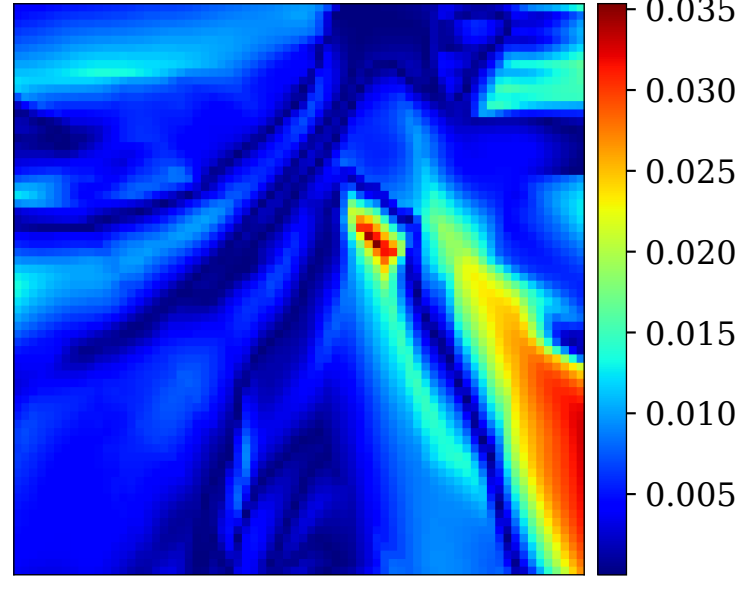

Supplement: supplementary_material [file gt_comp_top_98_(3, 0).pdf › EikonalENF_Jax-clean/experiments/fitting/figures/fwi_curvefault_b/test/gt_comp_top_98_(3, 0).pdf]

Velocity Field

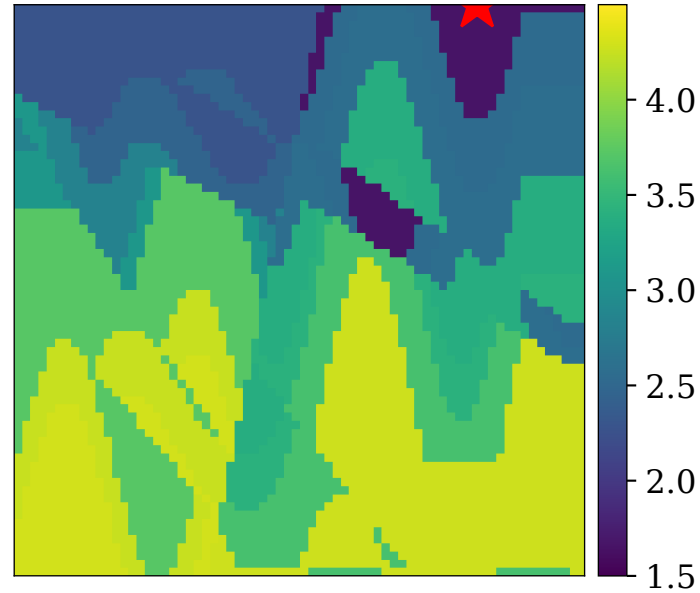

Ground Truth Time

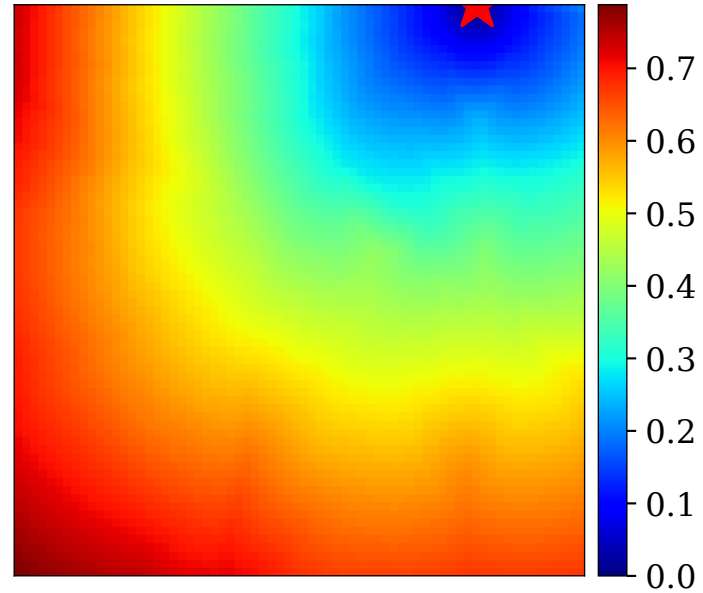

Predicted Time

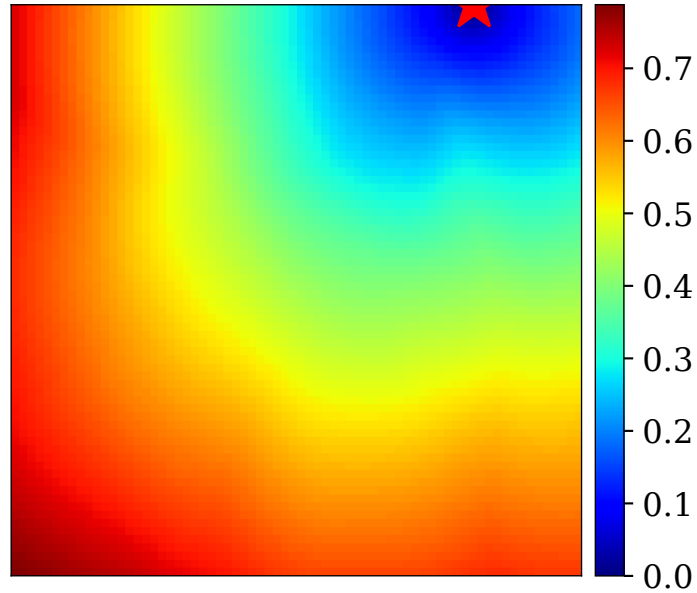

Absolute Error

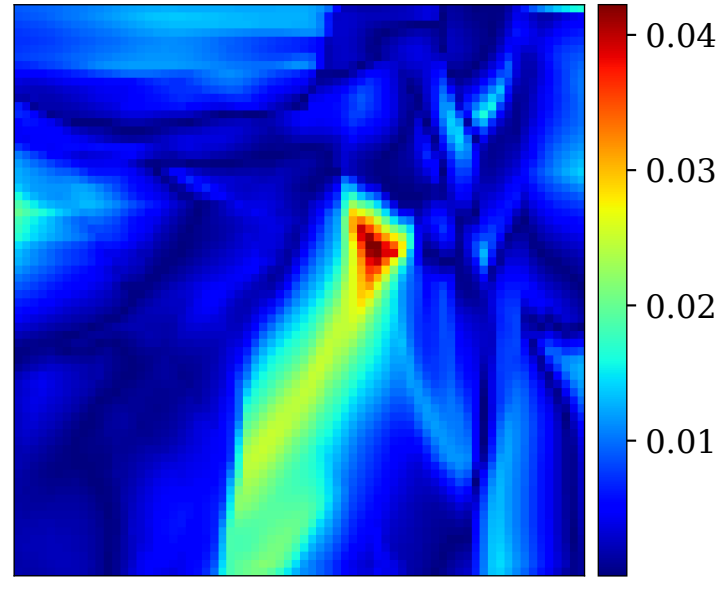

Supplement: supplementary_material [file gt_comp_top_98_(4, 0).pdf › EikonalENF_Jax-clean/experiments/fitting/figures/fwi_curvefault_b/test/gt_comp_top_98_(4, 0).pdf]

Velocity Field

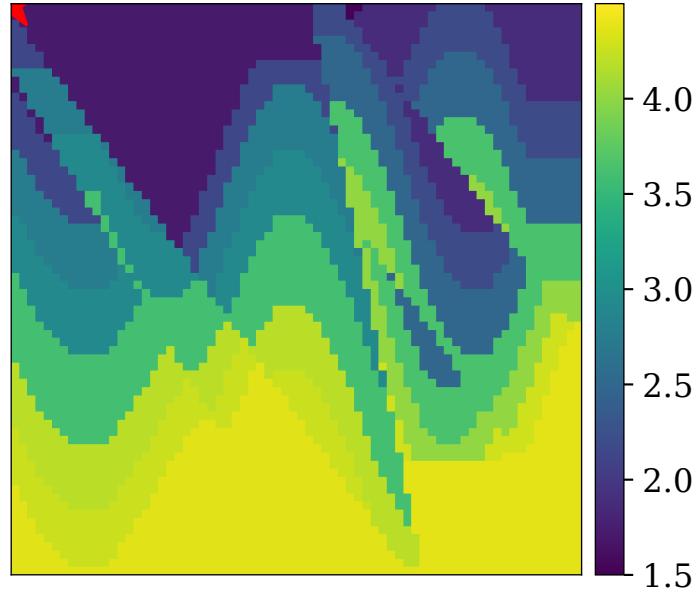

Ground Truth Time

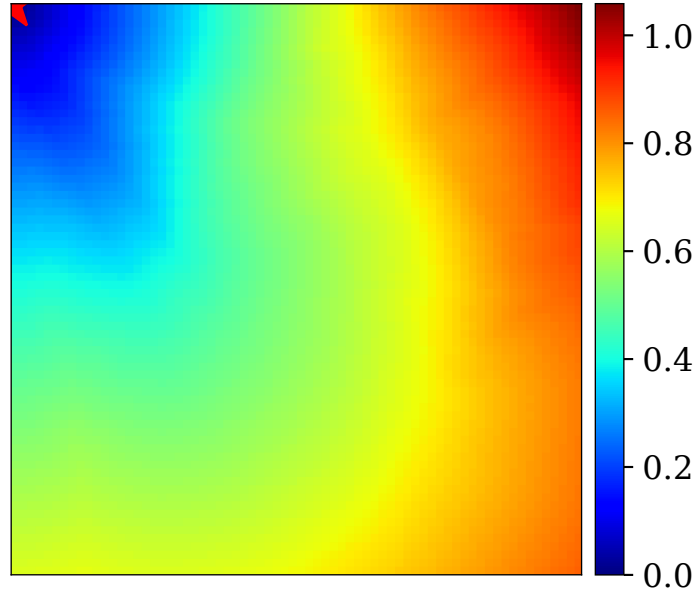

Predicted Time

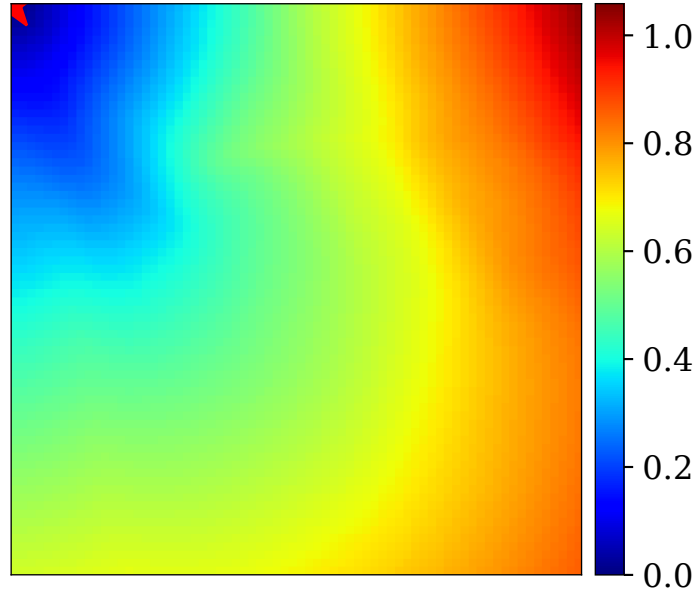

Absolute Error

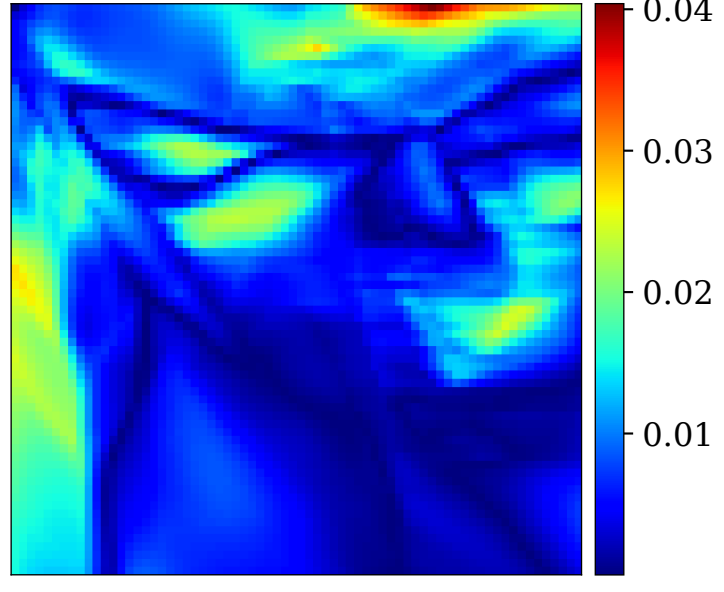

Supplement: supplementary_material [file gt_comp_top_99_(0, 0).pdf › EikonalENF_Jax-clean/experiments/fitting/figures/fwi_curvefault_b/test/gt_comp_top_99_(0, 0).pdf]

Velocity Field

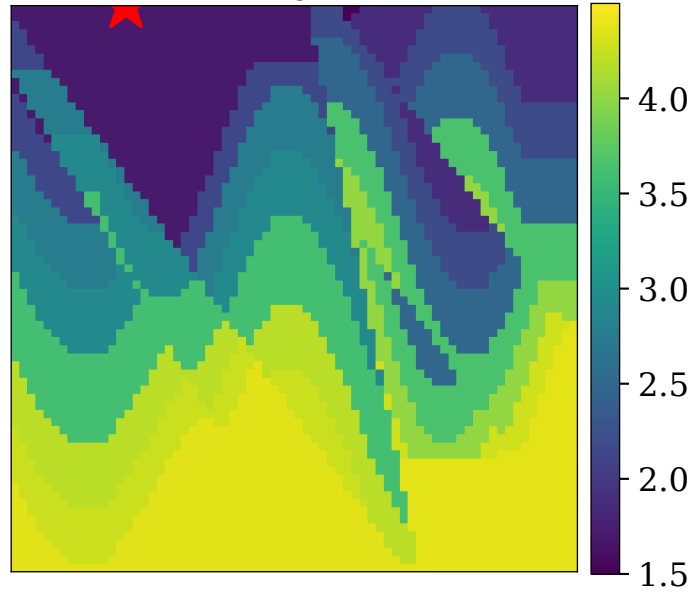

Ground Truth Time

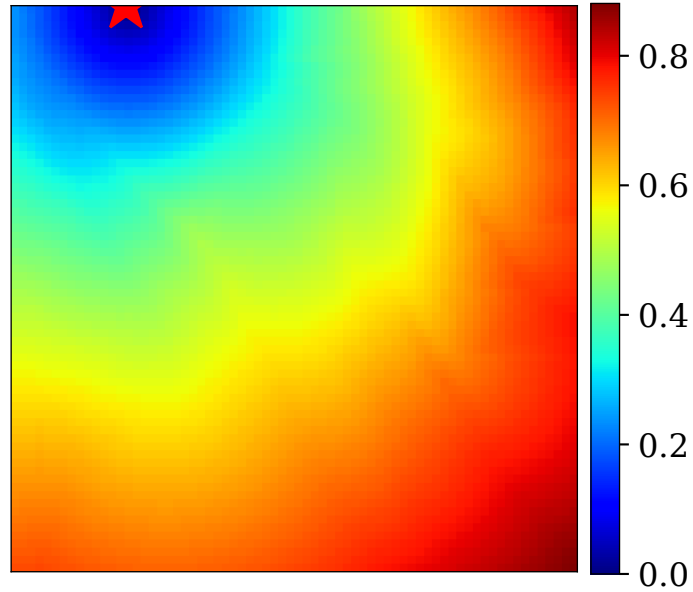

Predicted Time

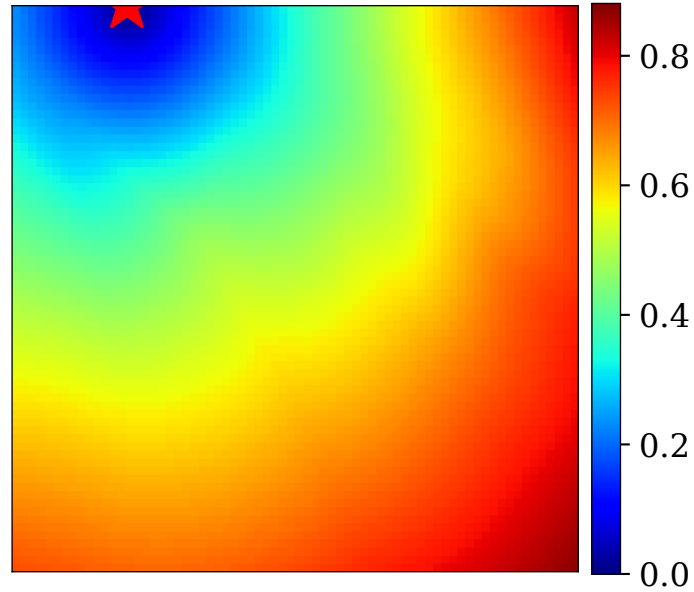

Absolute Error

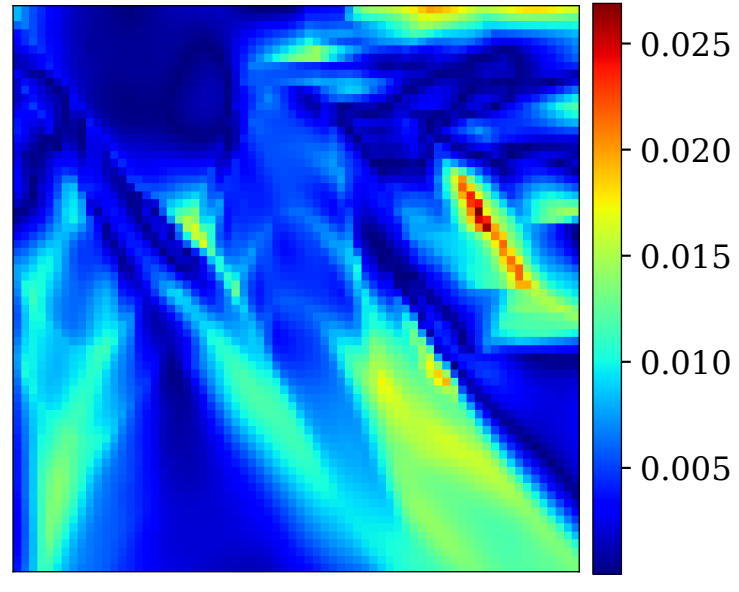

Supplement: supplementary_material [file gt_comp_top_99_(1, 0).pdf › EikonalENF_Jax-clean/experiments/fitting/figures/fwi_curvefault_b/test/gt_comp_top_99_(1, 0).pdf]

Velocity Field

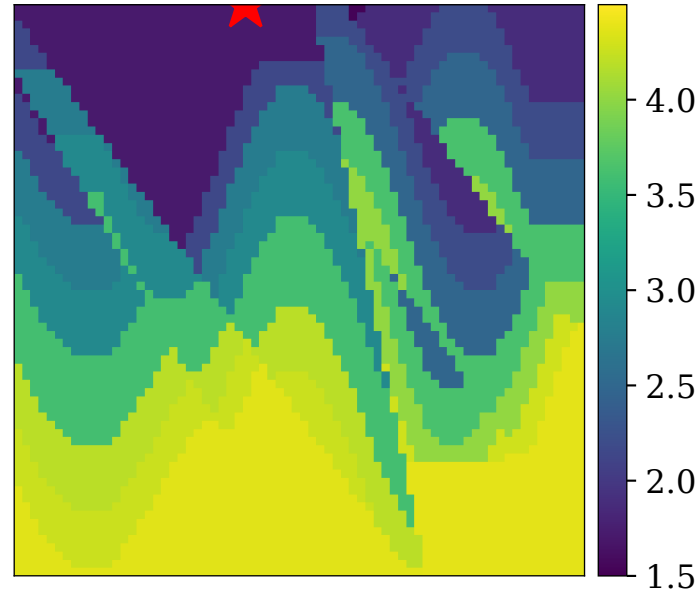

Ground Truth Time

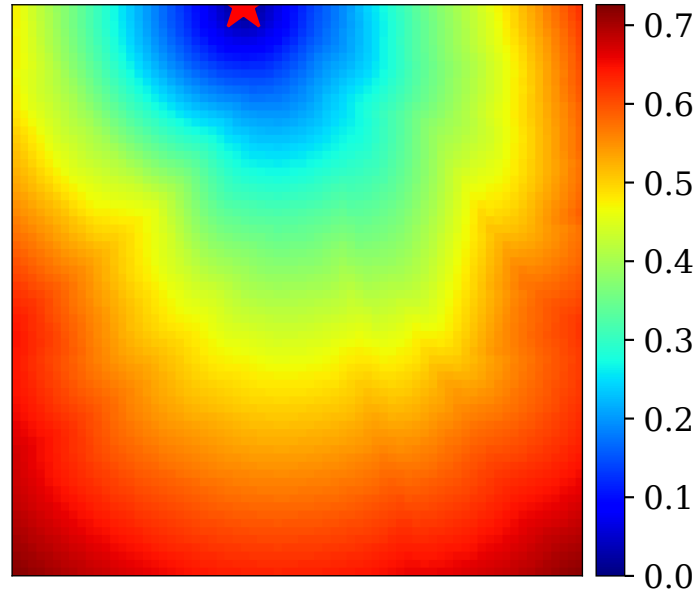

Predicted Time

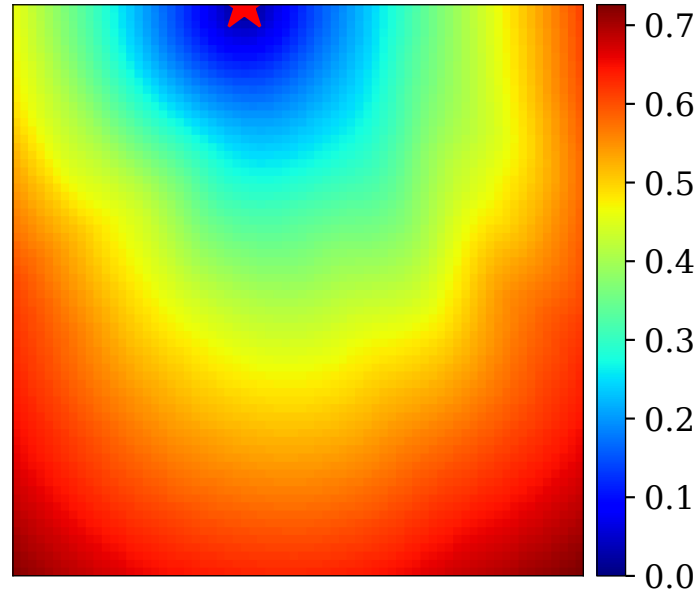

Absolute Error

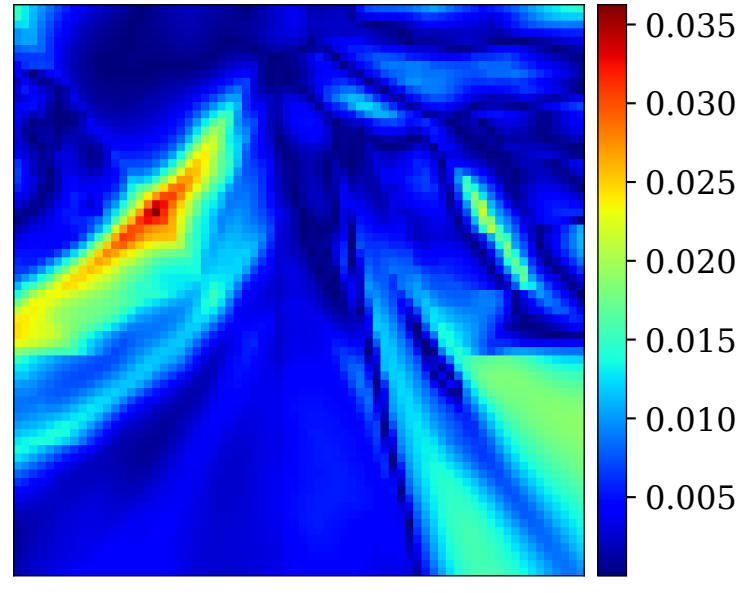

Supplement: supplementary_material [file gt_comp_top_99_(2, 0).pdf › EikonalENF_Jax-clean/experiments/fitting/figures/fwi_curvefault_b/test/gt_comp_top_99_(2, 0).pdf]

Velocity Field

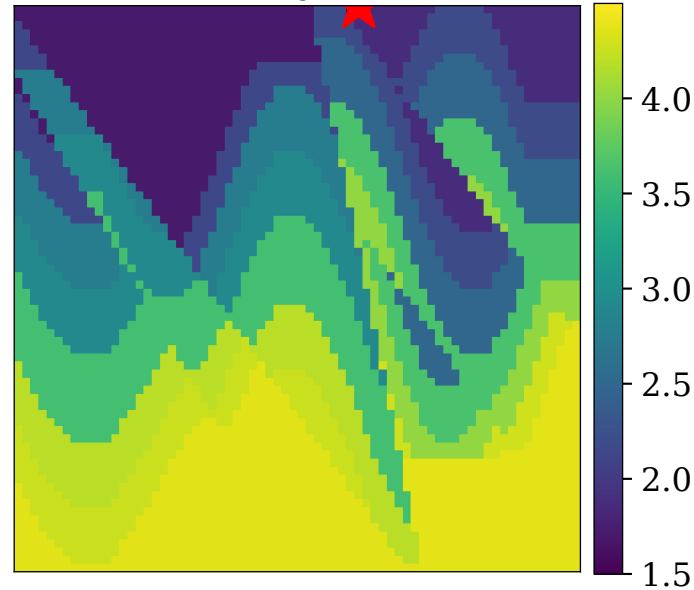

Ground Truth Time

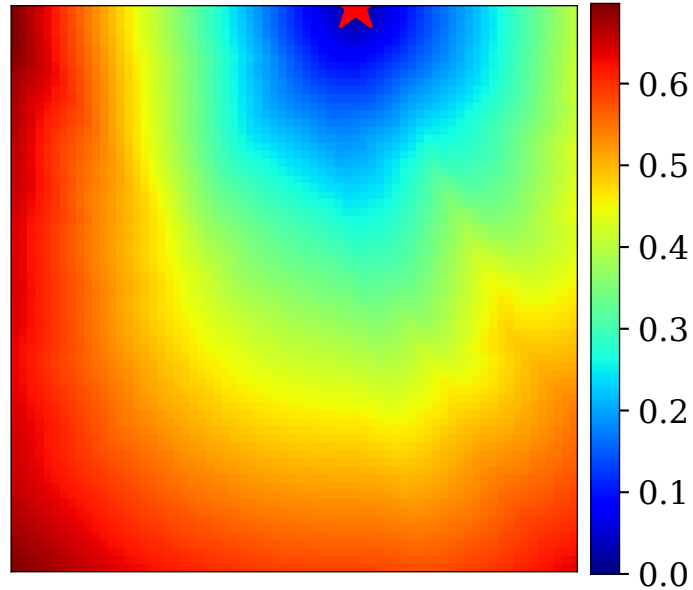

Predicted Time

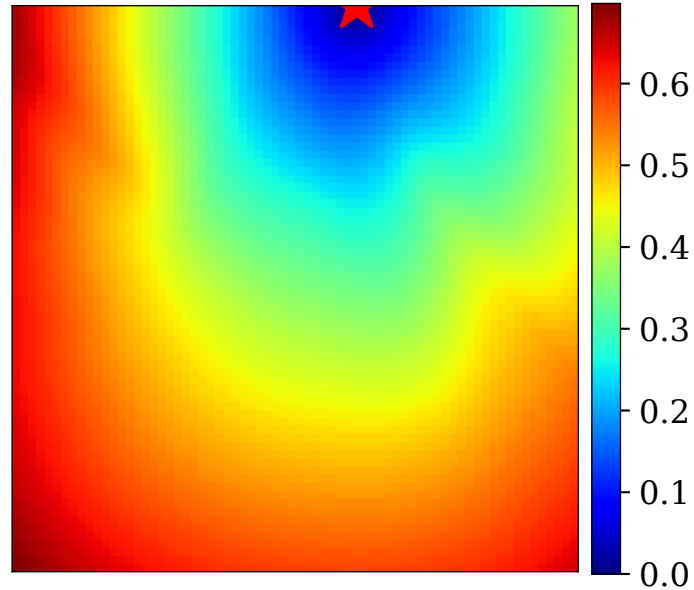

Absolute Error

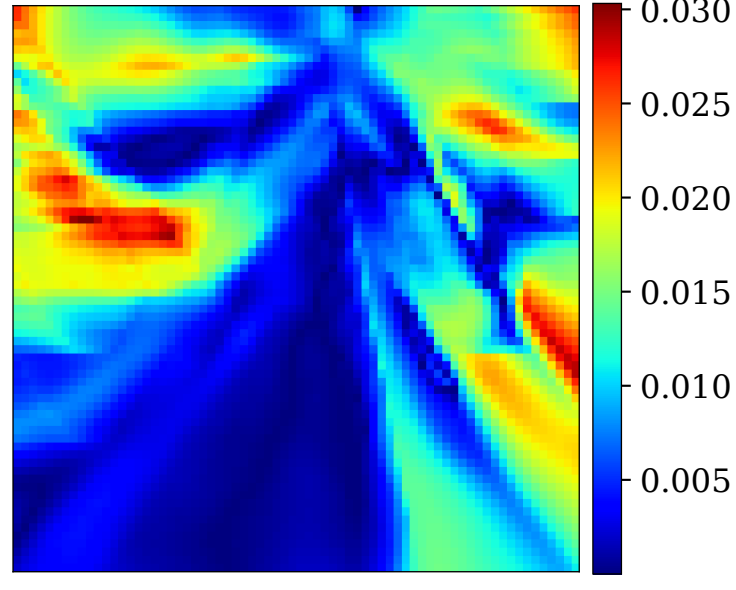

Supplement: supplementary_material [file gt_comp_top_99_(3, 0).pdf › EikonalENF_Jax-clean/experiments/fitting/figures/fwi_curvefault_b/test/gt_comp_top_99_(3, 0).pdf]

Velocity Field

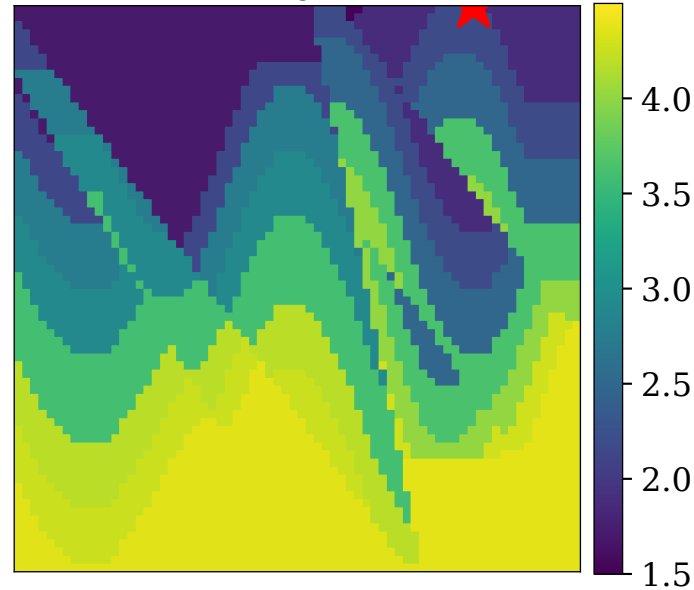

Ground Truth Time

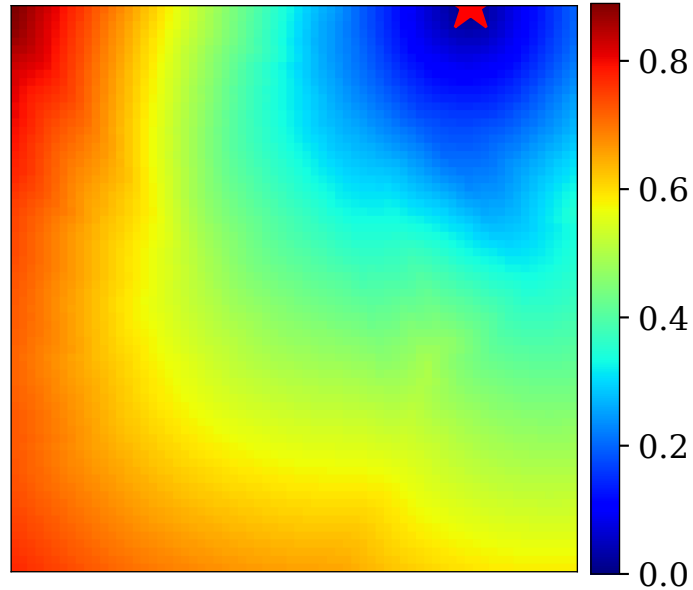

Predicted Time

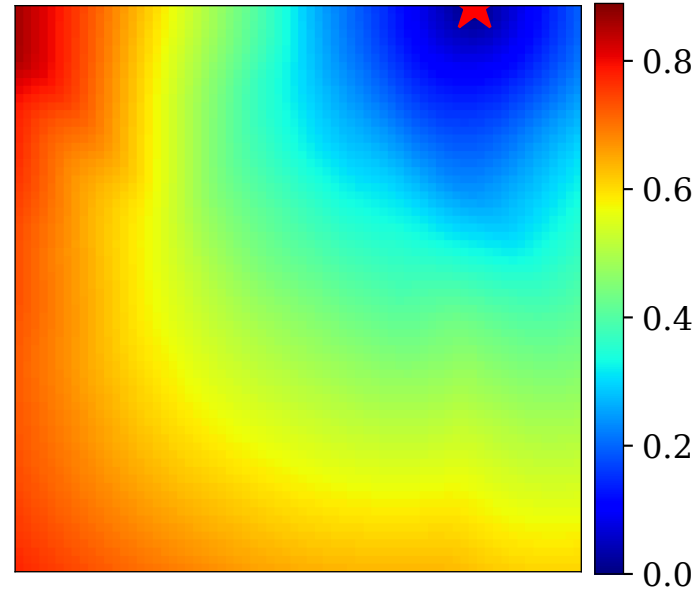

Absolute Error

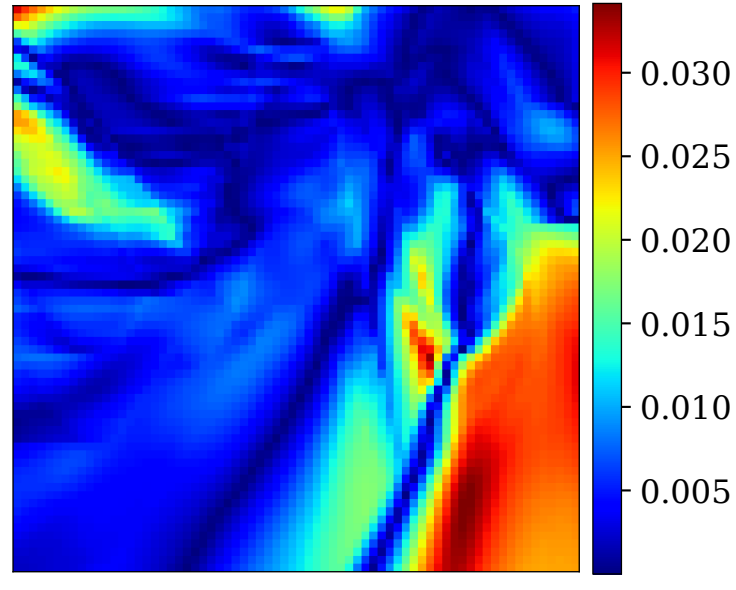

Supplement: supplementary_material [file gt_comp_top_99_(4, 0).pdf › EikonalENF_Jax-clean/experiments/fitting/figures/fwi_curvefault_b/test/gt_comp_top_99_(4, 0).pdf]

Velocity Field

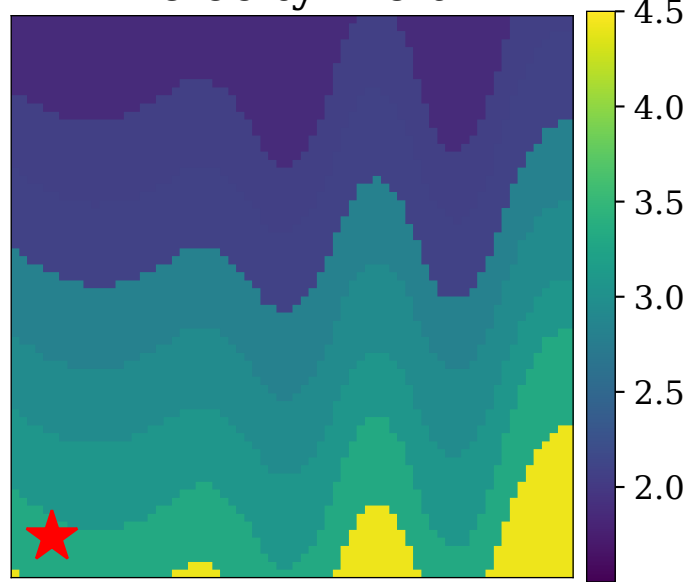

Ground Truth Time

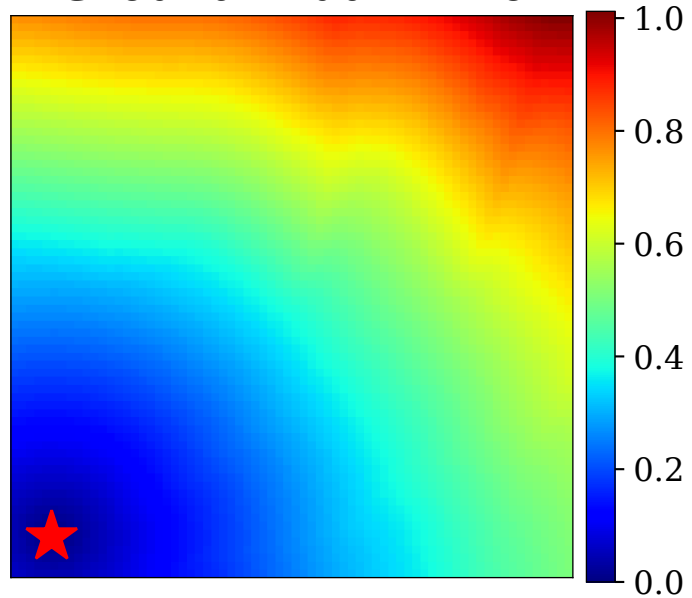

Predicted Time

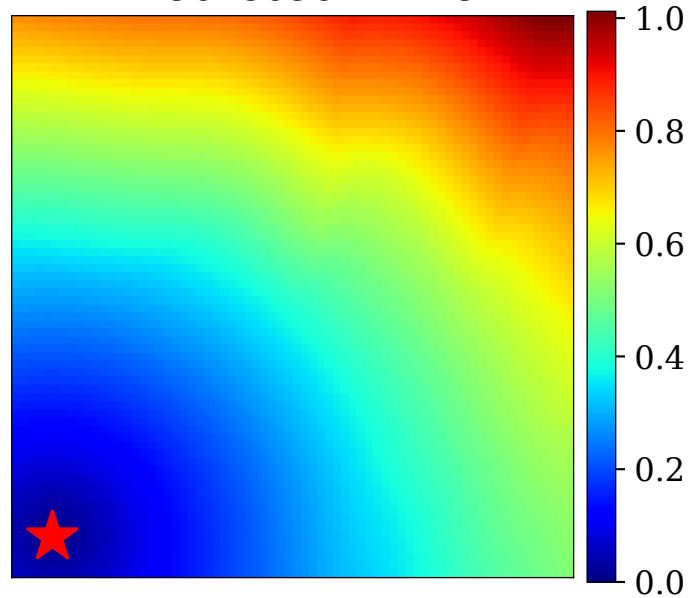

Absolute Error

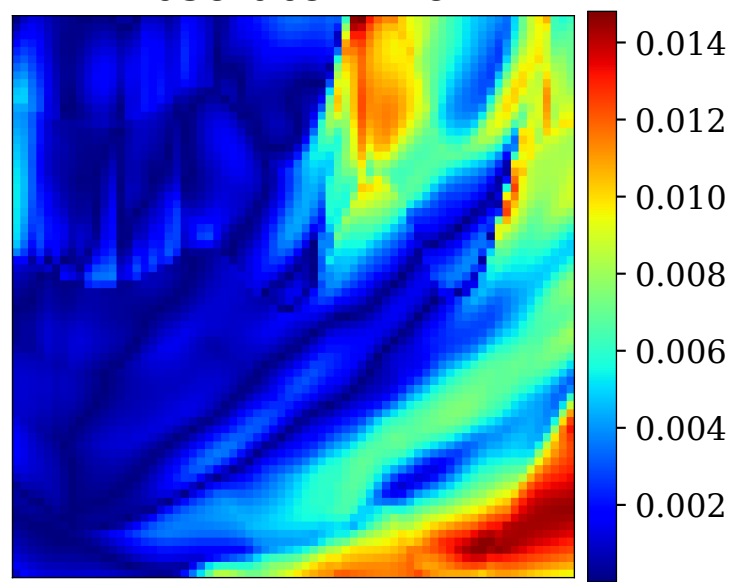

Supplement: supplementary_material [file gt_comp_full_98_(1, 1).pdf › EikonalENF_Jax-clean/experiments/fitting/figures/fwi_curvevel_a/test/gt_comp_full_98_(1, 1).pdf]

Velocity Field

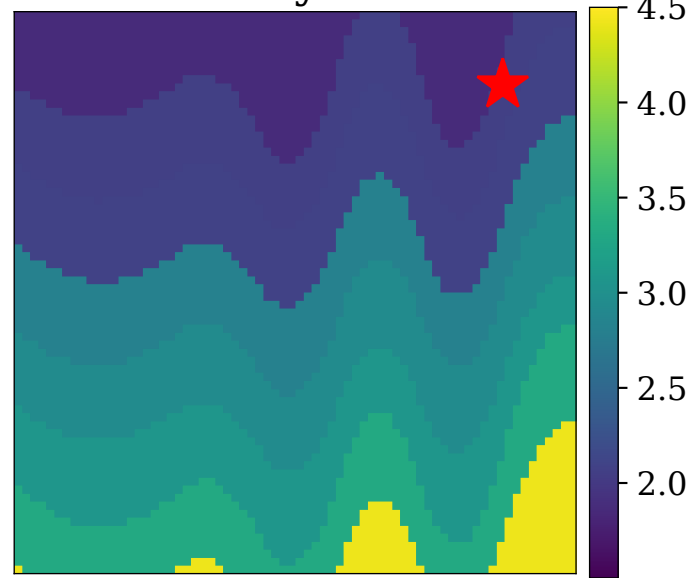

Ground Truth Time

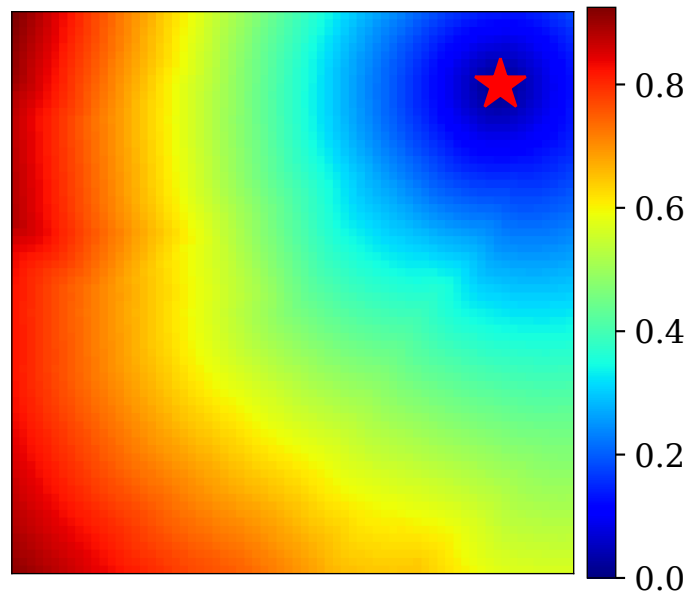

Predicted Time

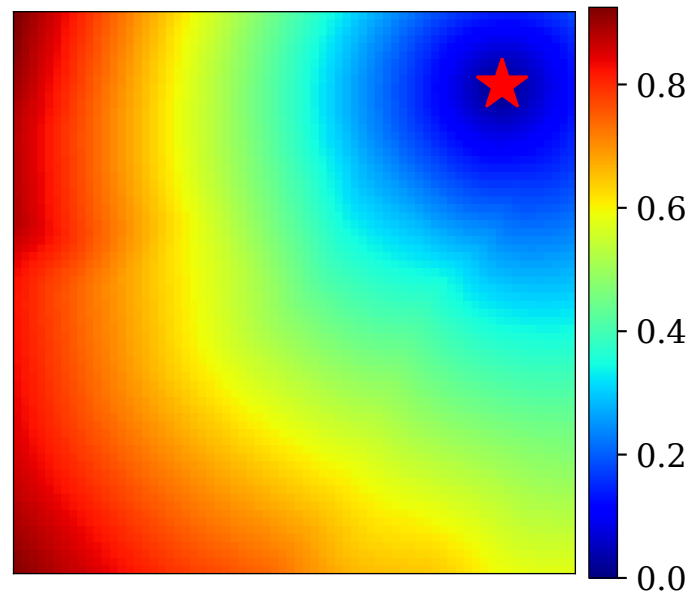

Absolute Error

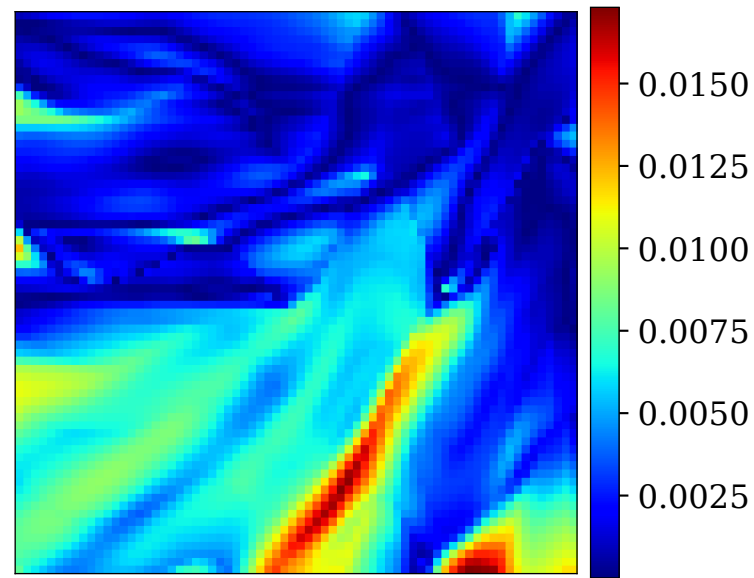

Supplement: supplementary_material [file gt_comp_full_98_(12, 12).pdf › EikonalENF_Jax-clean/experiments/fitting/figures/fwi_curvevel_a/test/gt_comp_full_98_(12, 12).pdf]

Velocity Field

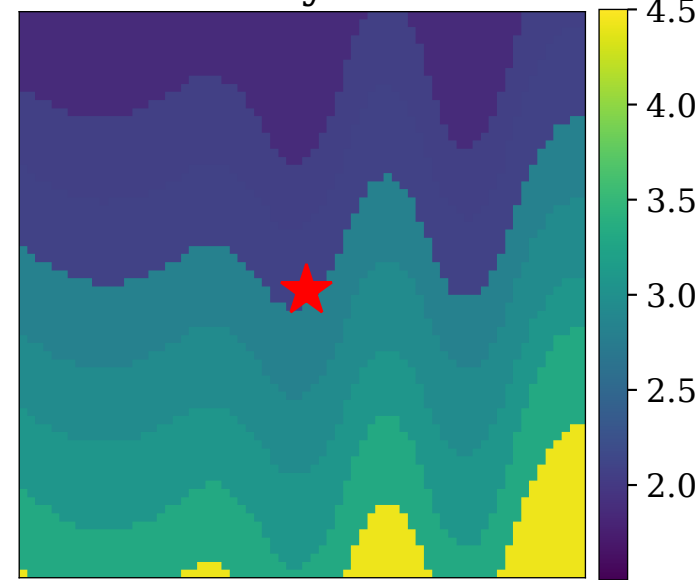

Ground Truth Time

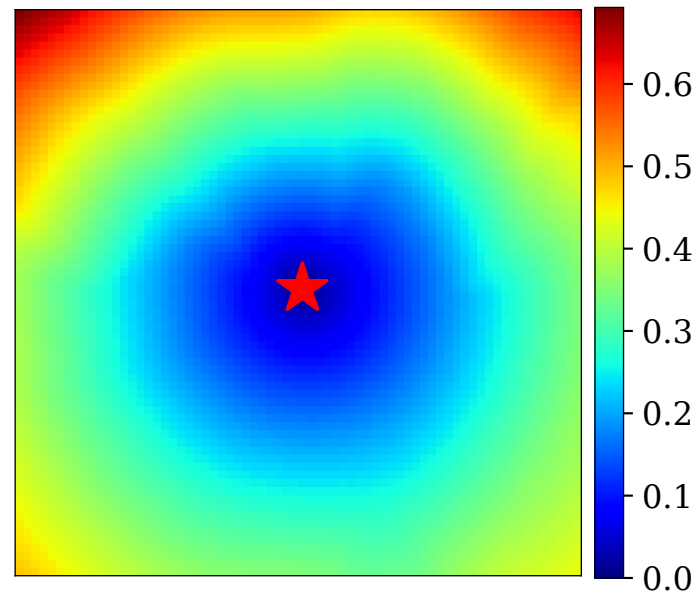

Predicted Time

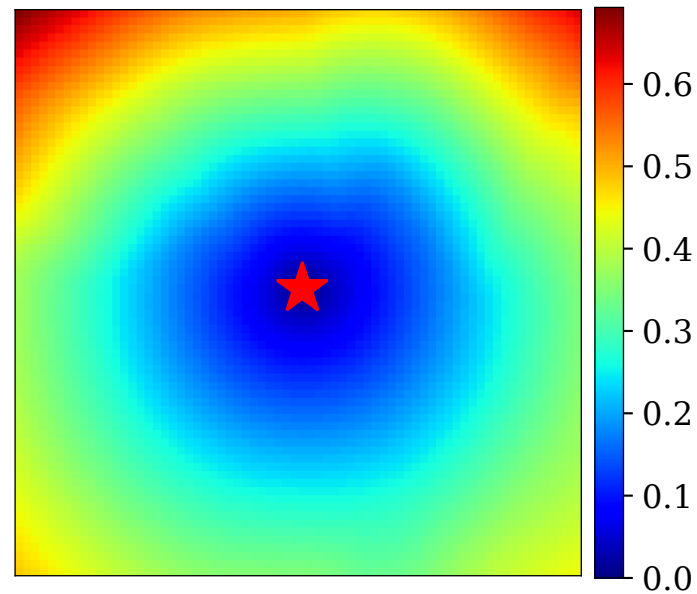

Absolute Error

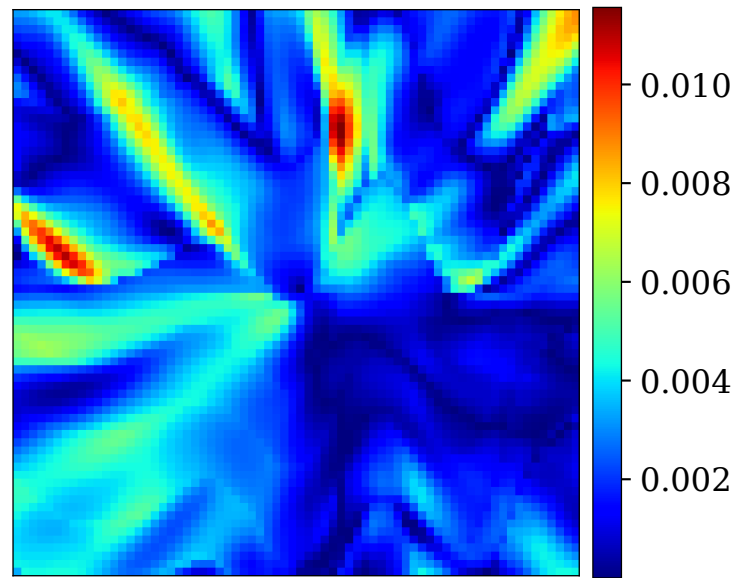

Supplement: supplementary_material [file gt_comp_full_98_(7, 7).pdf › EikonalENF_Jax-clean/experiments/fitting/figures/fwi_curvevel_a/test/gt_comp_full_98_(7, 7).pdf]

Velocity Field

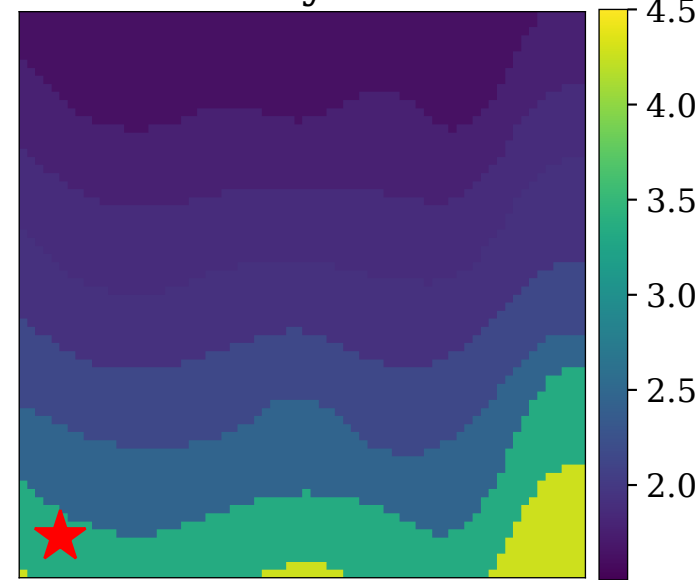

Ground Truth Time

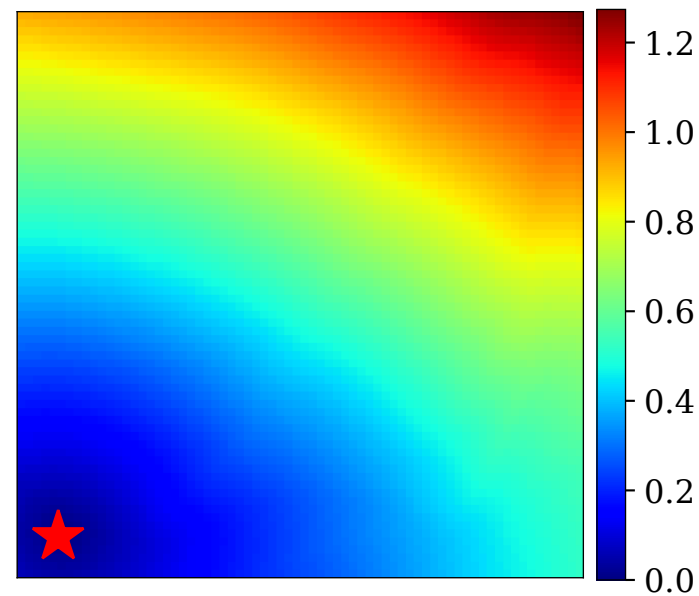

Predicted Time

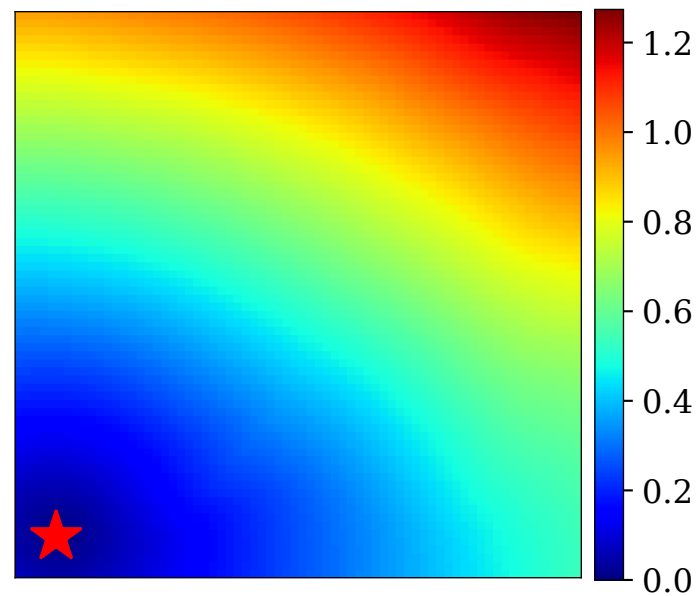

Absolute Error

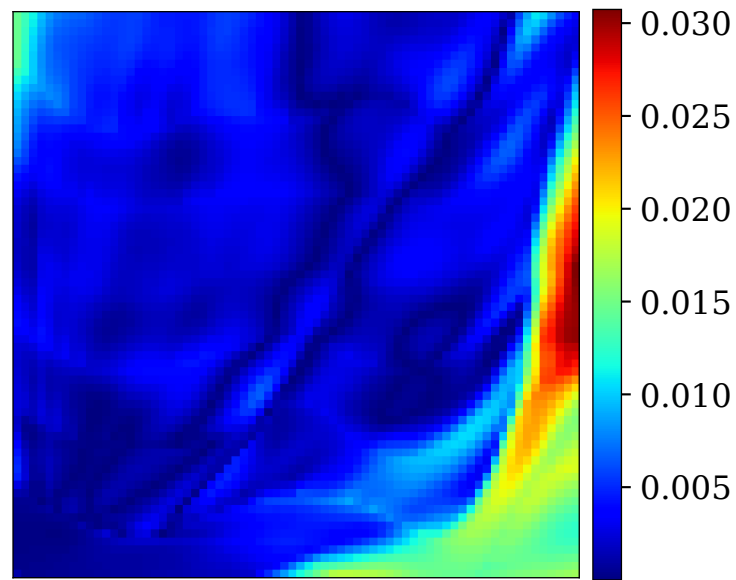

Supplement: supplementary_material [file gt_comp_full_99_(1, 1).pdf › EikonalENF_Jax-clean/experiments/fitting/figures/fwi_curvevel_a/test/gt_comp_full_99_(1, 1).pdf]

Velocity Field

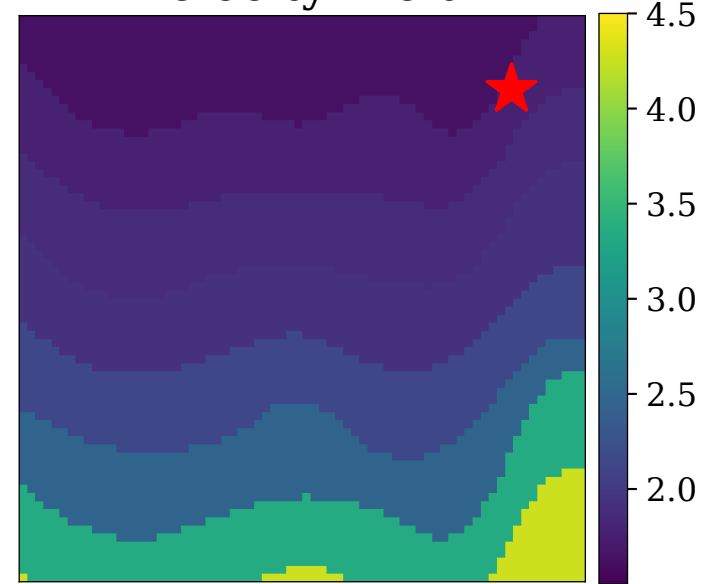

Ground Truth Time

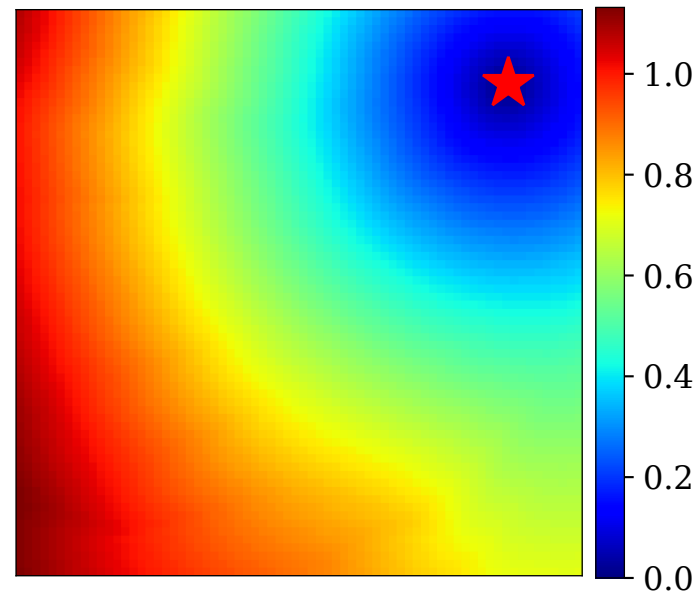

Predicted Time

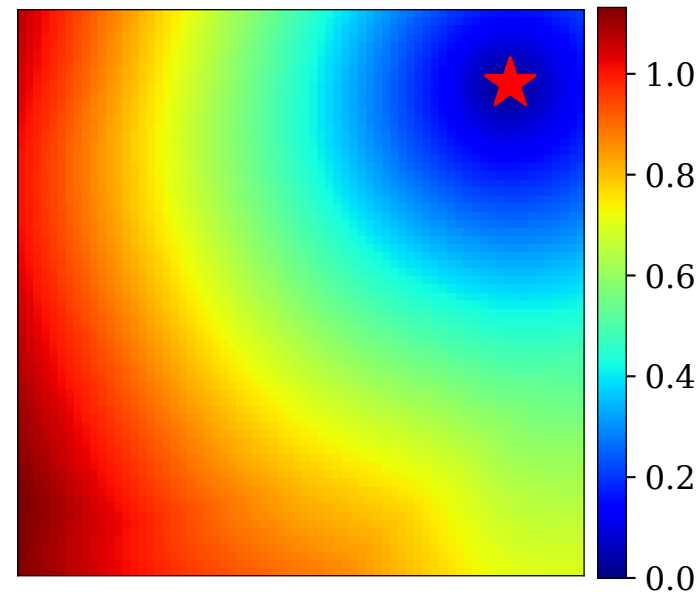

Absolute Error

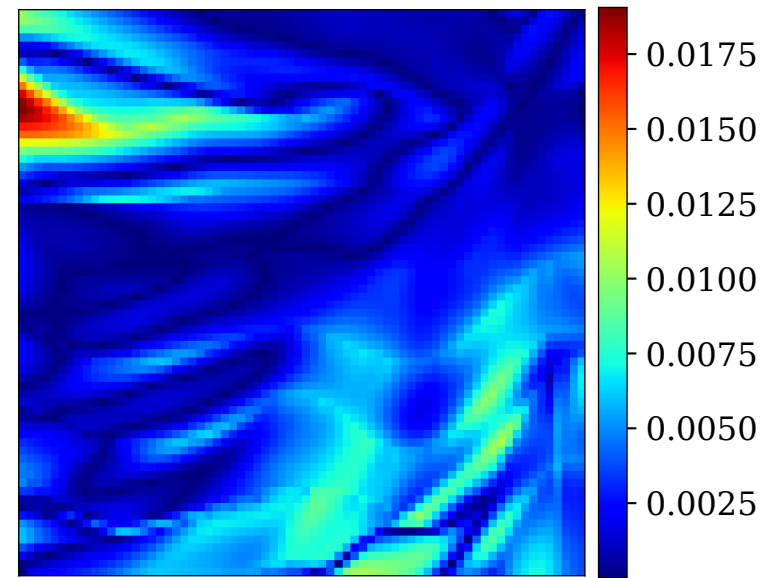

Supplement: supplementary_material [file gt_comp_full_99_(12, 12).pdf › EikonalENF_Jax-clean/experiments/fitting/figures/fwi_curvevel_a/test/gt_comp_full_99_(12, 12).pdf]

Velocity Field

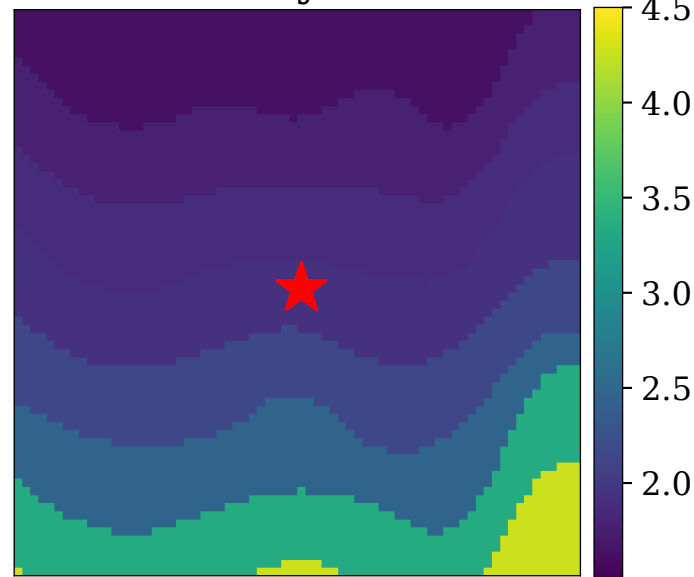

Ground Truth Time

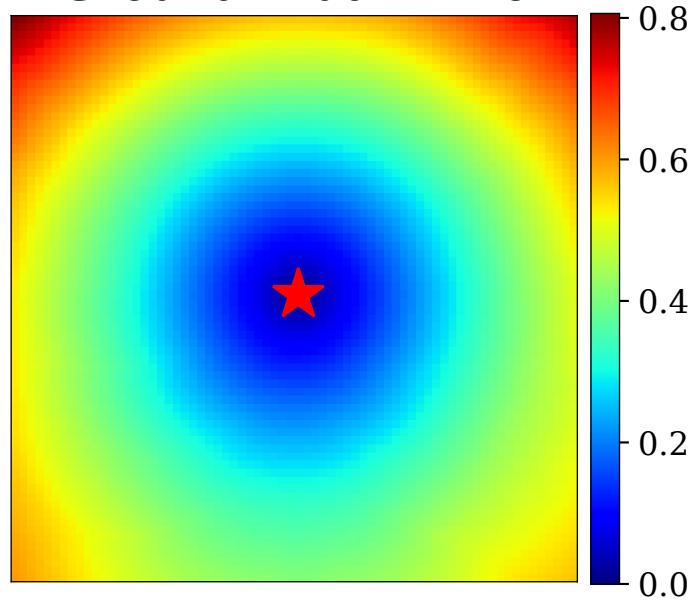

Predicted Time

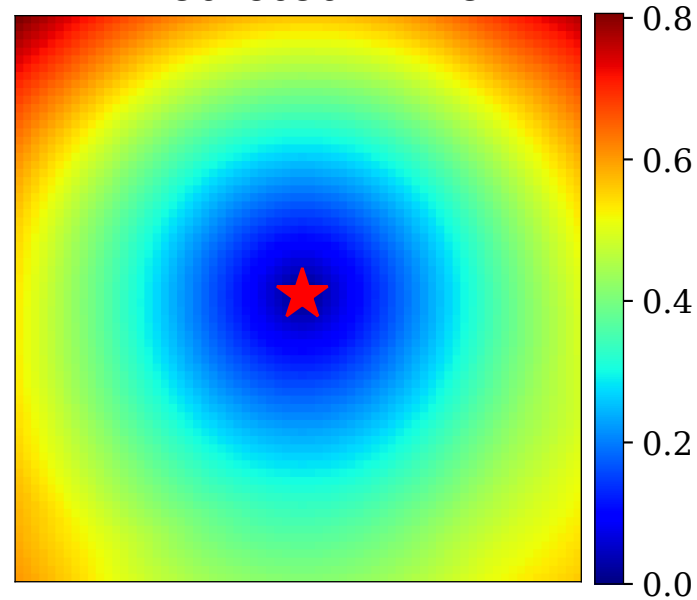

Absolute Error

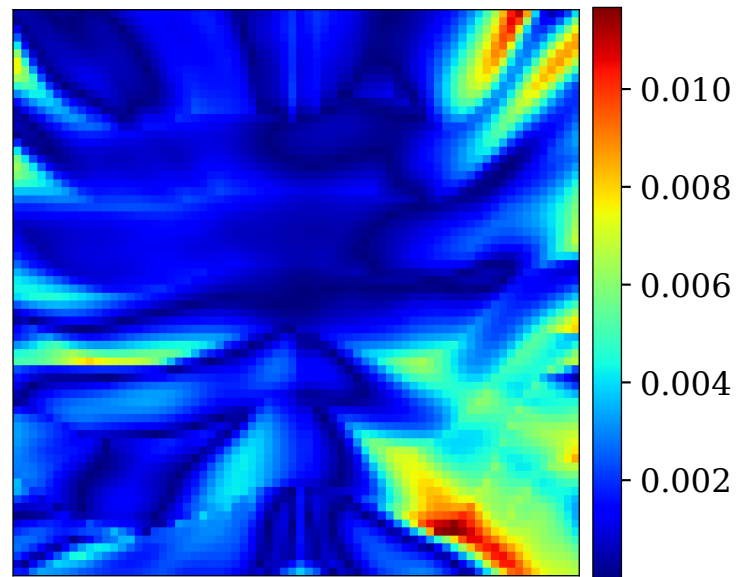

Supplement: supplementary_material [file gt_comp_full_99_(7, 7).pdf › EikonalENF_Jax-clean/experiments/fitting/figures/fwi_curvevel_a/test/gt_comp_full_99_(7, 7).pdf]

Velocity Field

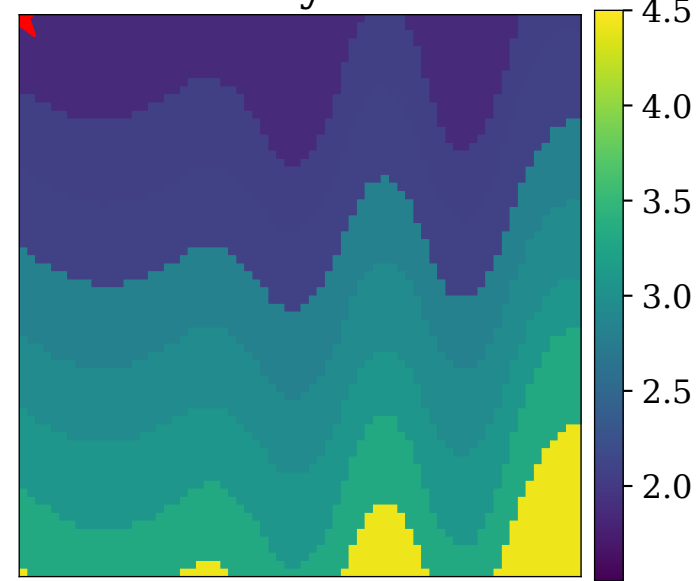

Ground Truth Time

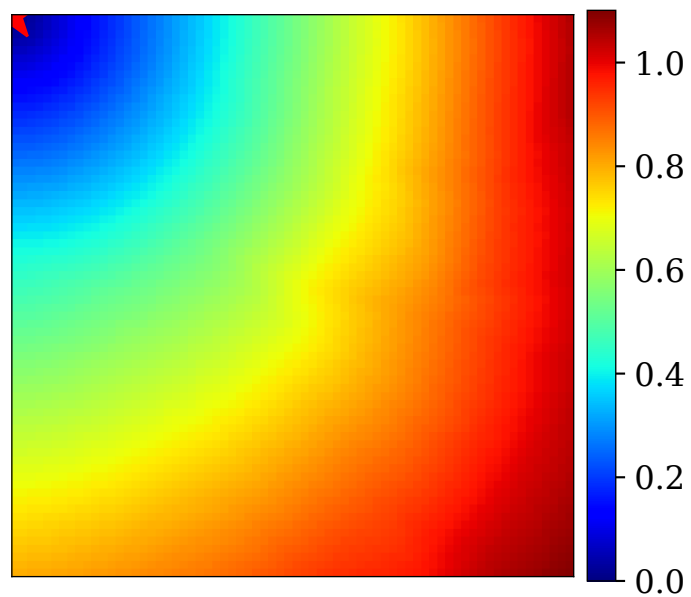

Predicted Time

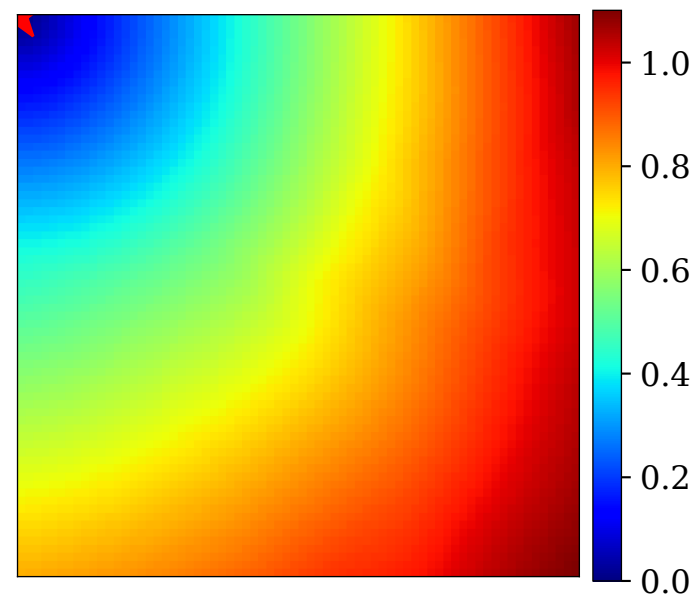

Absolute Error

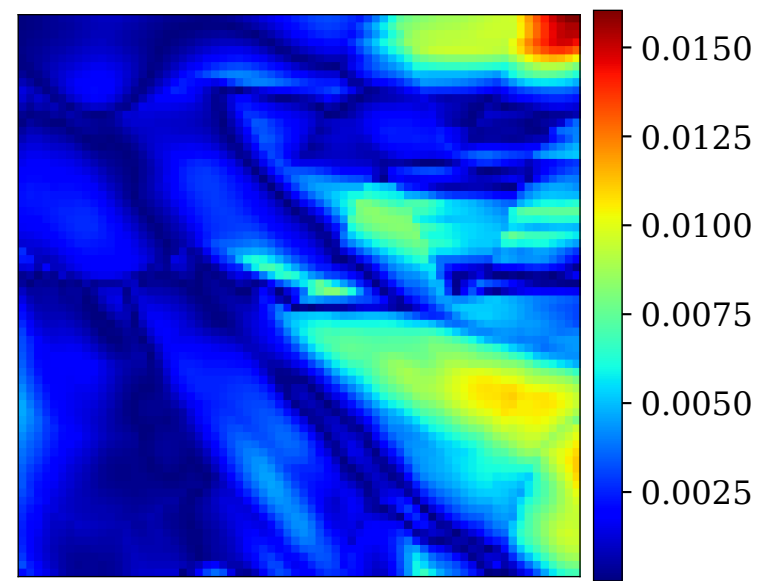

Supplement: supplementary_material [file gt_comp_top_98_(0, 0).pdf › EikonalENF_Jax-clean/experiments/fitting/figures/fwi_curvevel_a/test/gt_comp_top_98_(0, 0).pdf]

Velocity Field

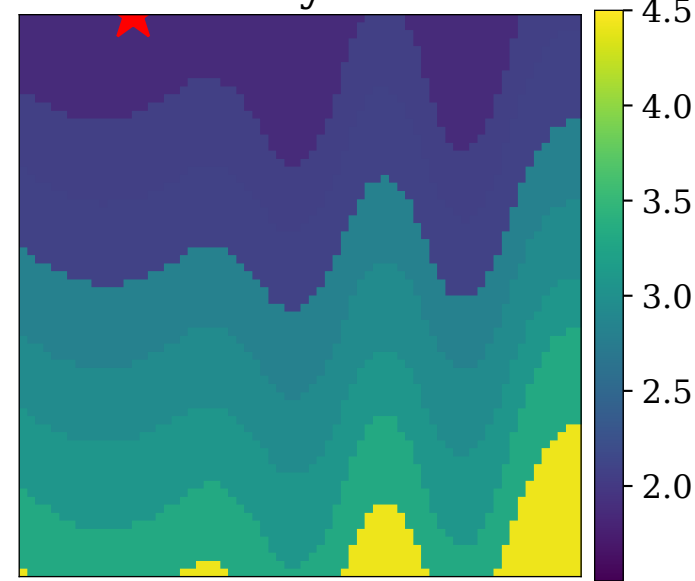

Ground Truth Time

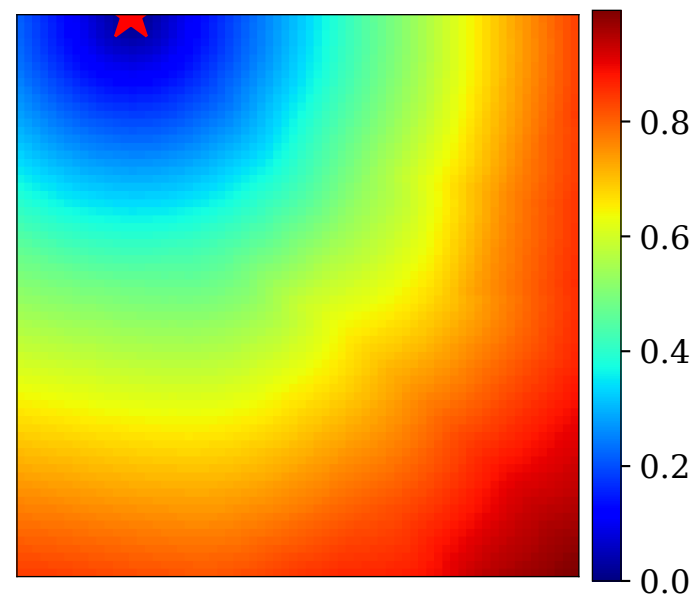

Predicted Time

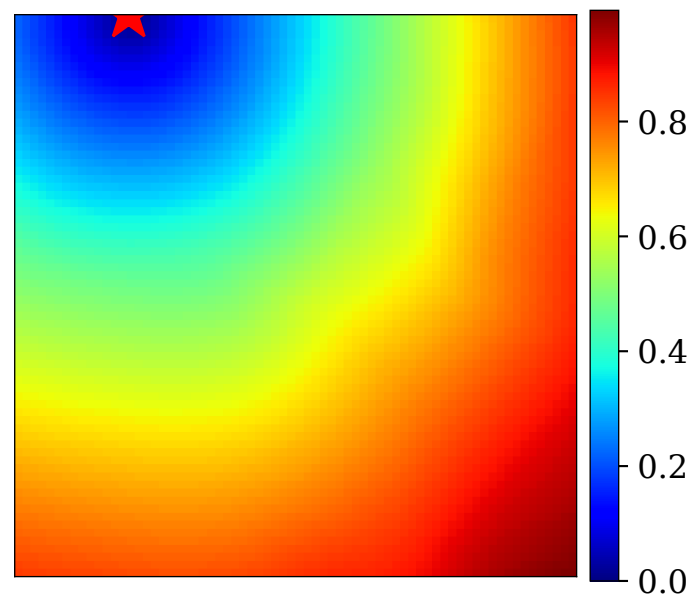

Absolute Error

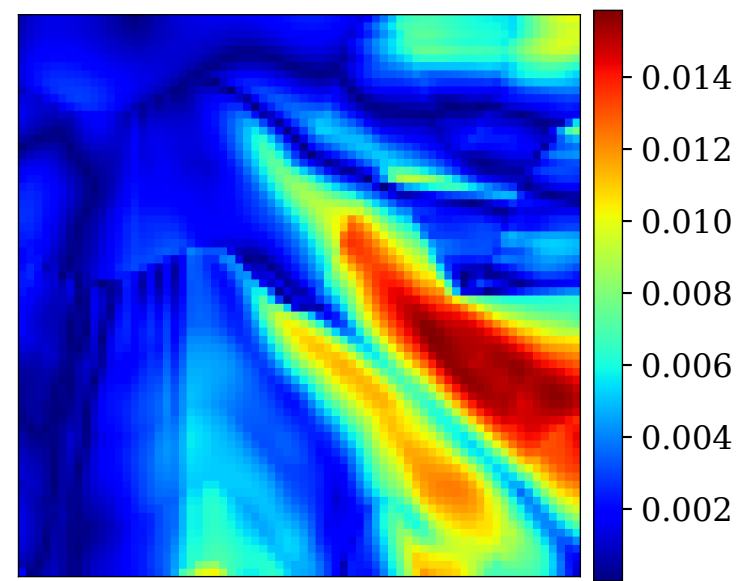

Supplement: supplementary_material [file gt_comp_top_98_(1, 0).pdf › EikonalENF_Jax-clean/experiments/fitting/figures/fwi_curvevel_a/test/gt_comp_top_98_(1, 0).pdf]

Velocity Field

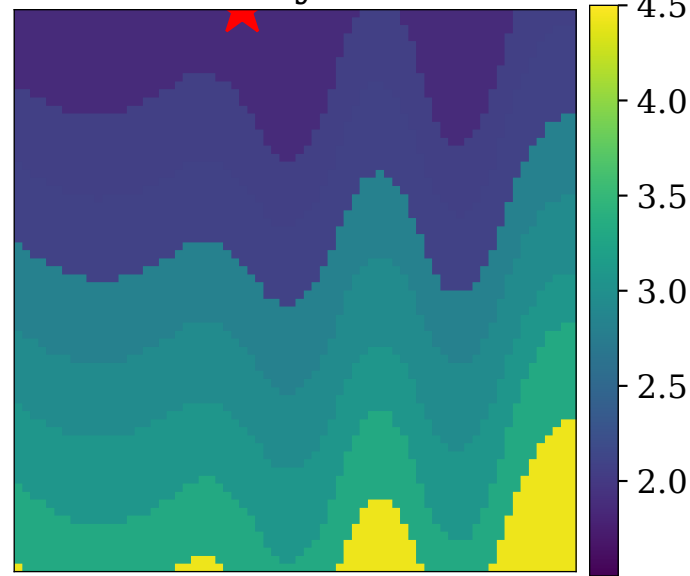

Ground Truth Time

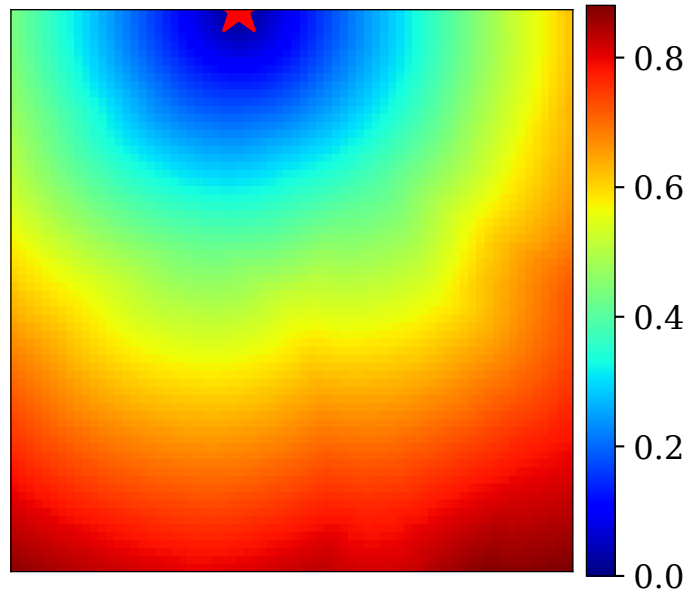

Predicted Time

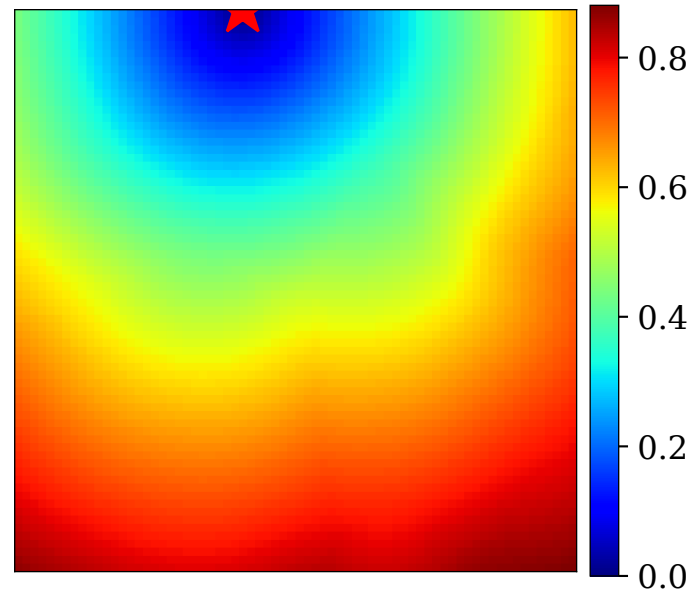

Absolute Error

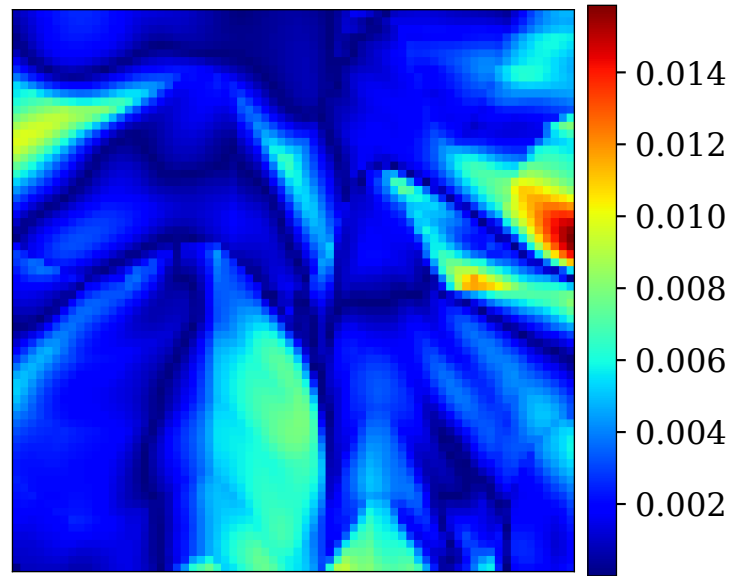

Supplement: supplementary_material [file gt_comp_top_98_(2, 0).pdf › EikonalENF_Jax-clean/experiments/fitting/figures/fwi_curvevel_a/test/gt_comp_top_98_(2, 0).pdf]

Velocity Field

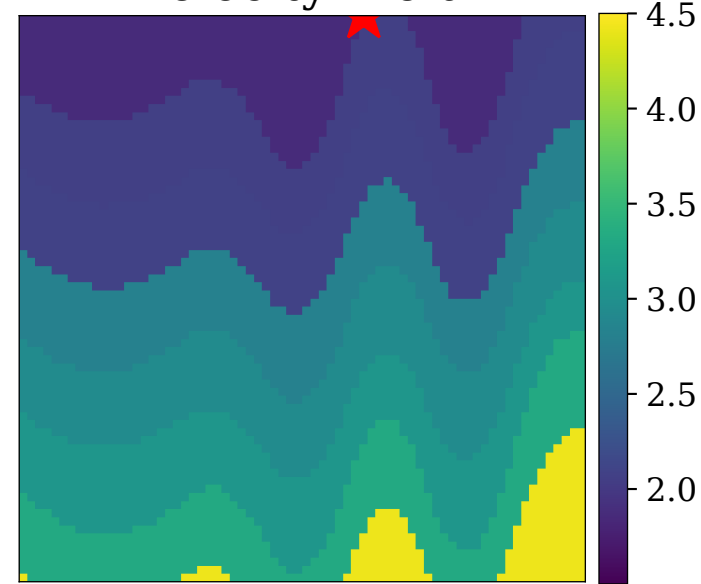

Ground Truth Time

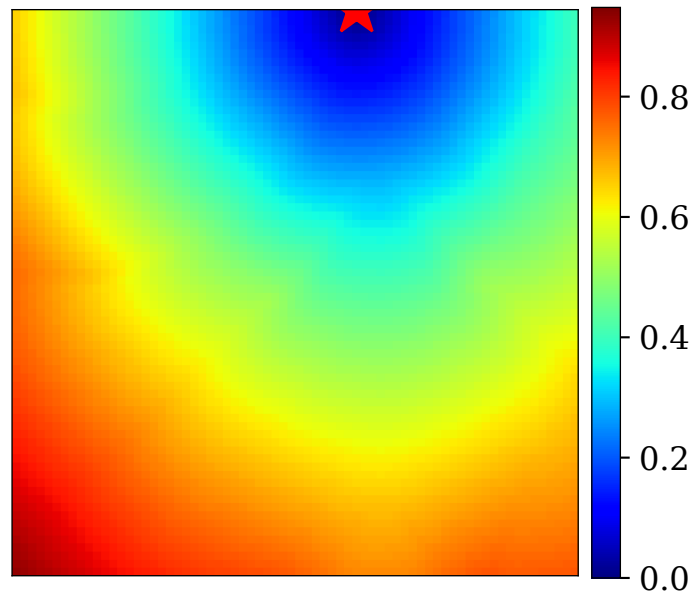

Predicted Time

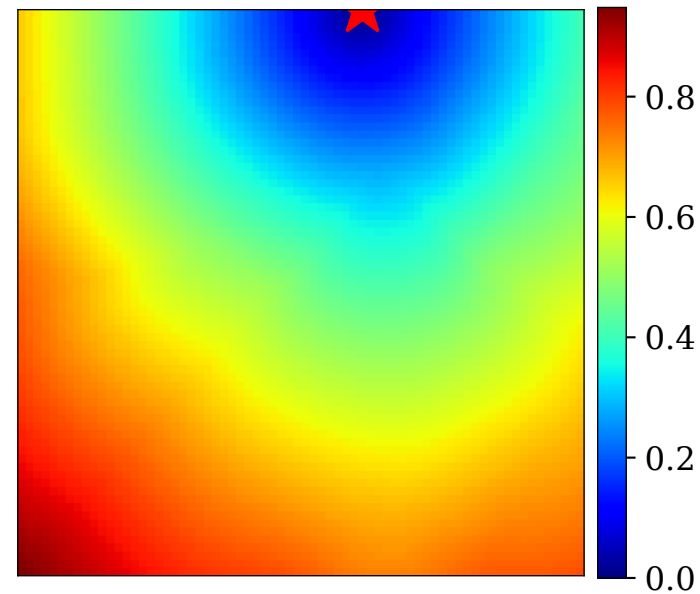

Absolute Error

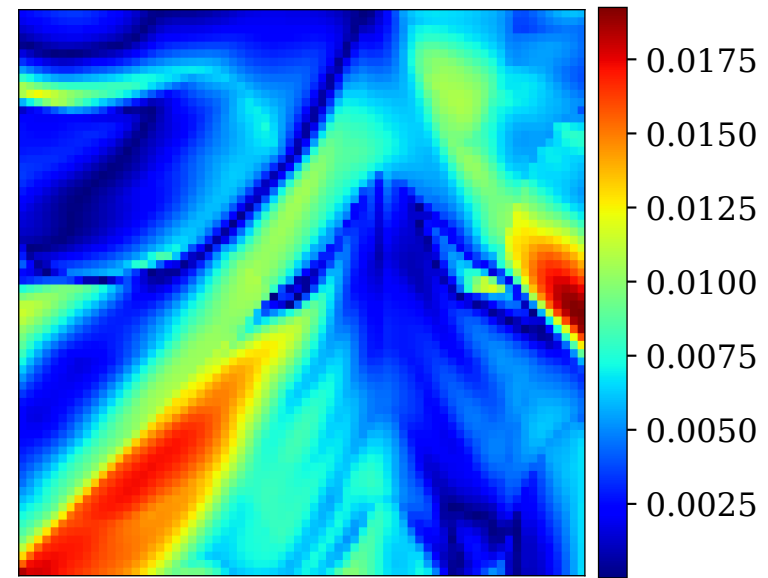

Supplement: supplementary_material [file gt_comp_top_98_(3, 0).pdf › EikonalENF_Jax-clean/experiments/fitting/figures/fwi_curvevel_a/test/gt_comp_top_98_(3, 0).pdf]

Velocity Field

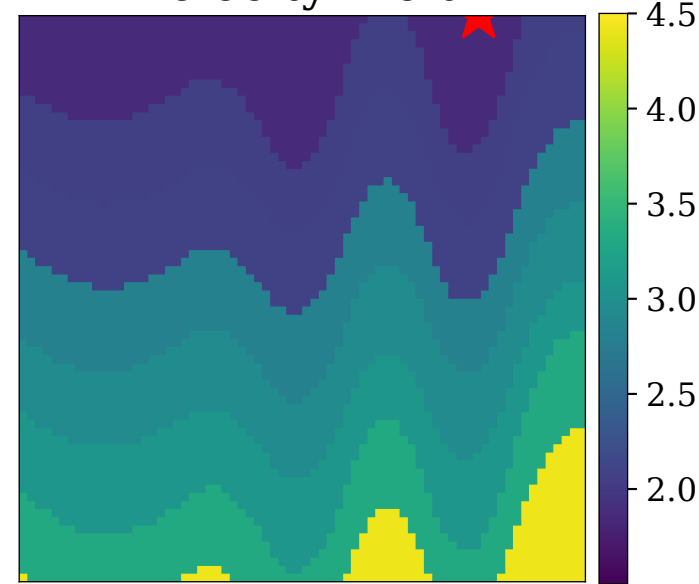

Ground Truth Time

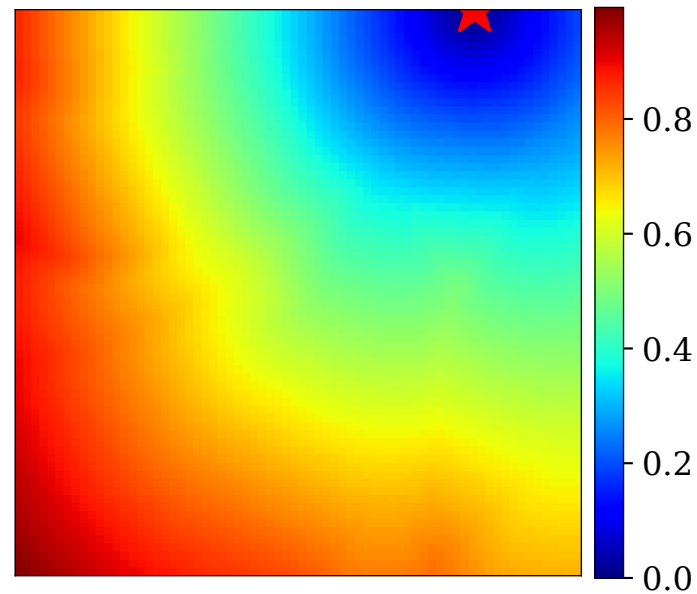

Predicted Time

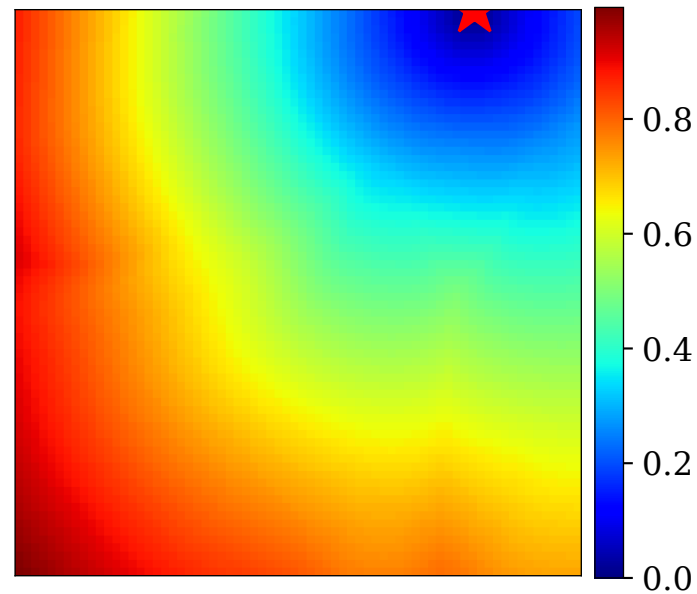

Absolute Error

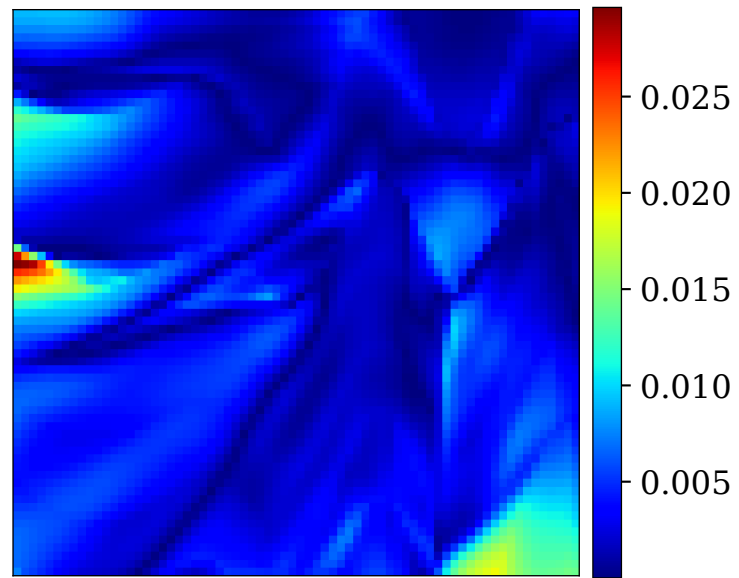

Supplement: supplementary_material [file gt_comp_top_98_(4, 0).pdf › EikonalENF_Jax-clean/experiments/fitting/figures/fwi_curvevel_a/test/gt_comp_top_98_(4, 0).pdf]

Velocity Field

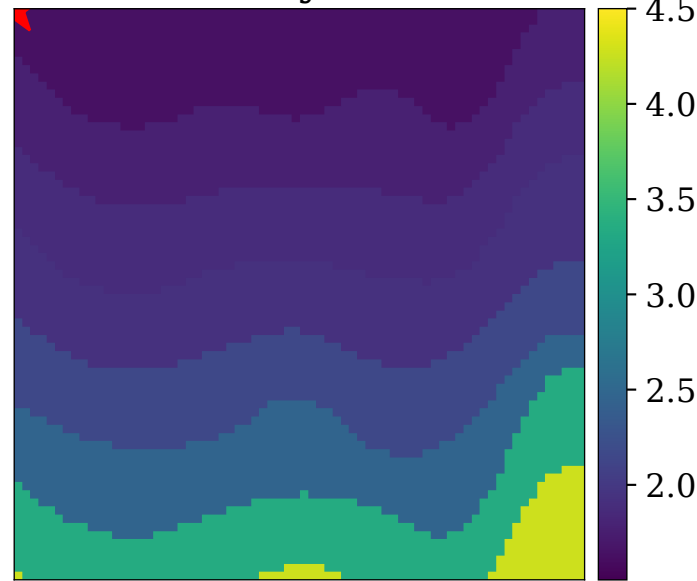

Ground Truth Time

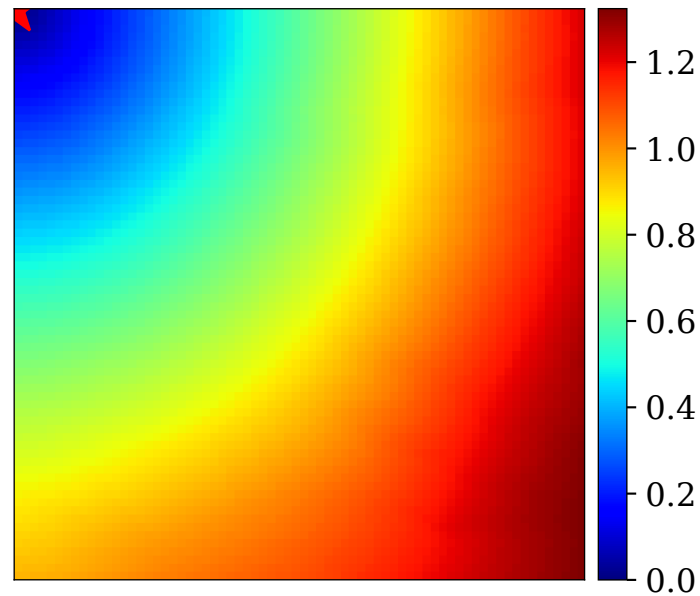

Predicted Time

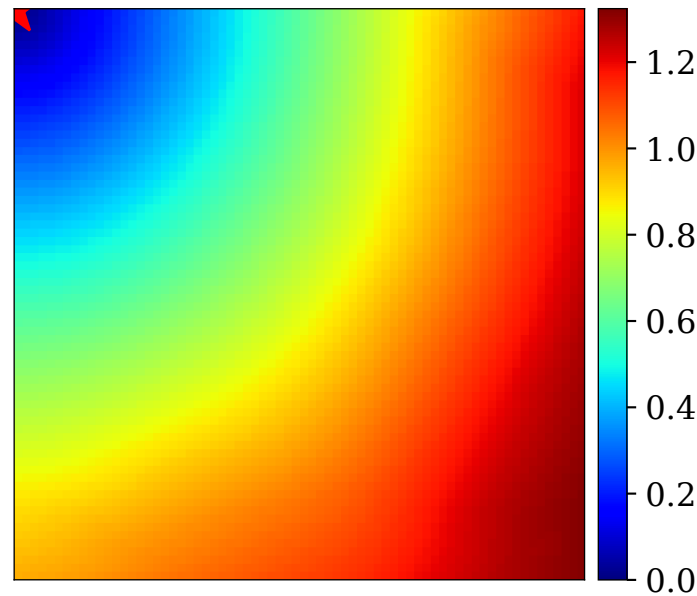

Absolute Error

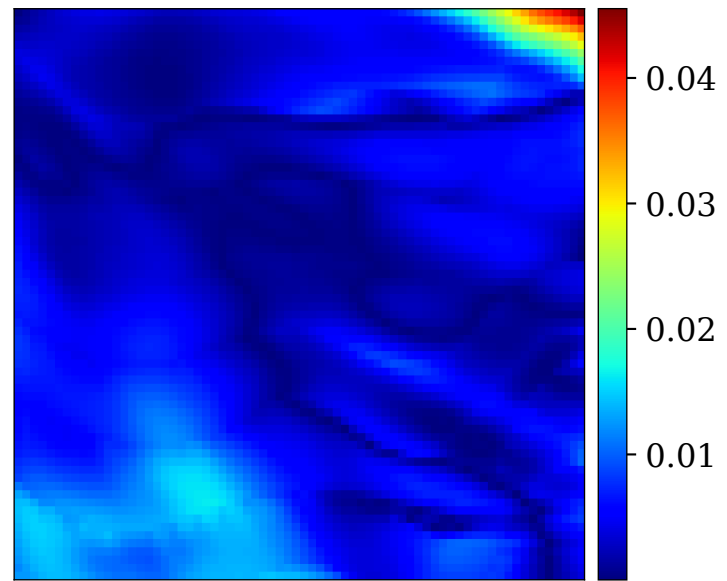

Supplement: supplementary_material [file gt_comp_top_99_(0, 0).pdf › EikonalENF_Jax-clean/experiments/fitting/figures/fwi_curvevel_a/test/gt_comp_top_99_(0, 0).pdf]

Velocity Field

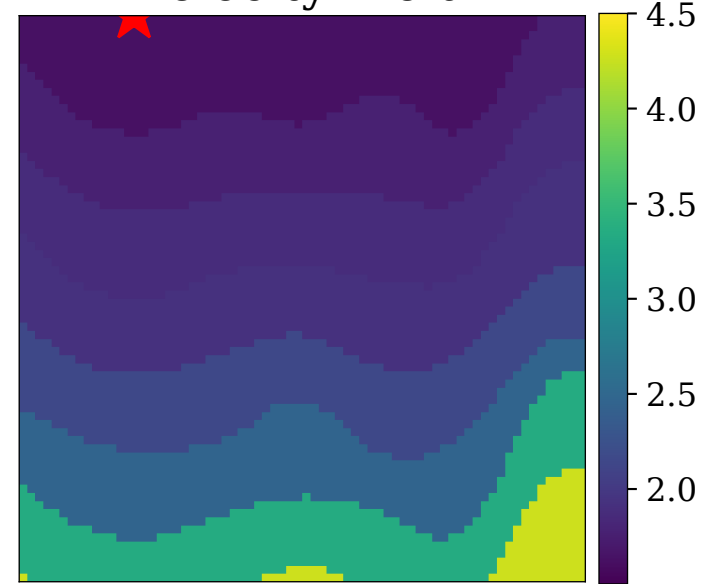

Ground Truth Time

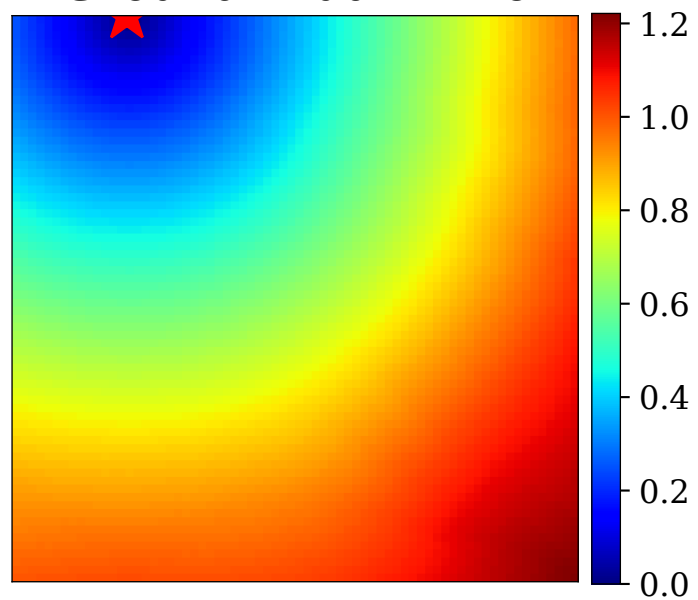

Predicted Time

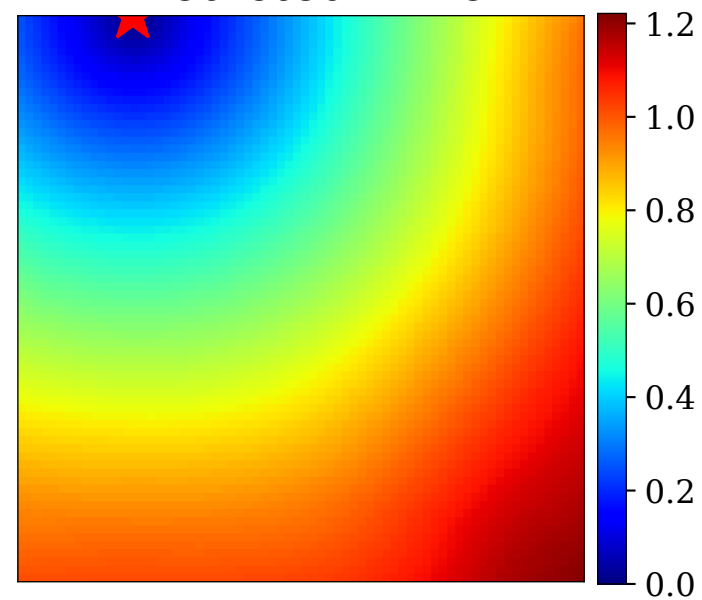

Absolute Error

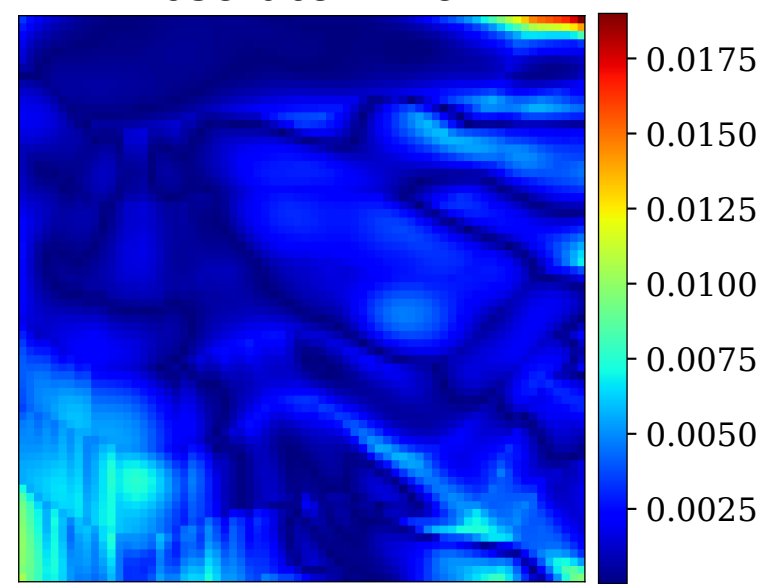

Supplement: supplementary_material [file gt_comp_top_99_(1, 0).pdf › EikonalENF_Jax-clean/experiments/fitting/figures/fwi_curvevel_a/test/gt_comp_top_99_(1, 0).pdf]

Velocity Field

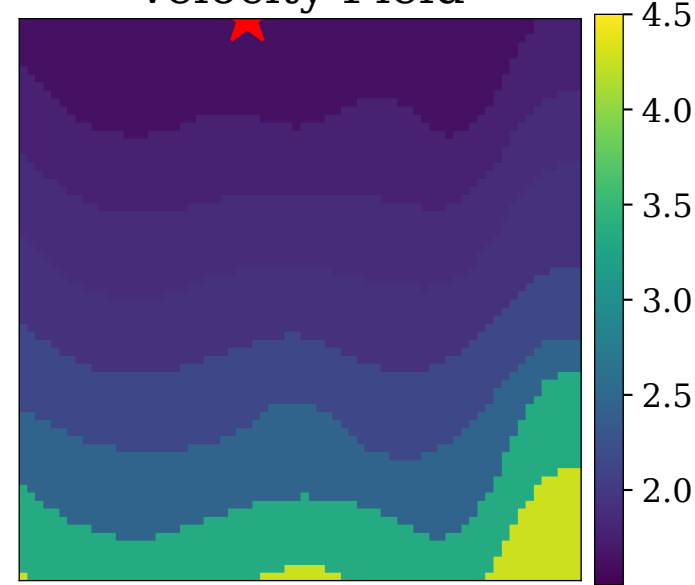

Ground Truth Time

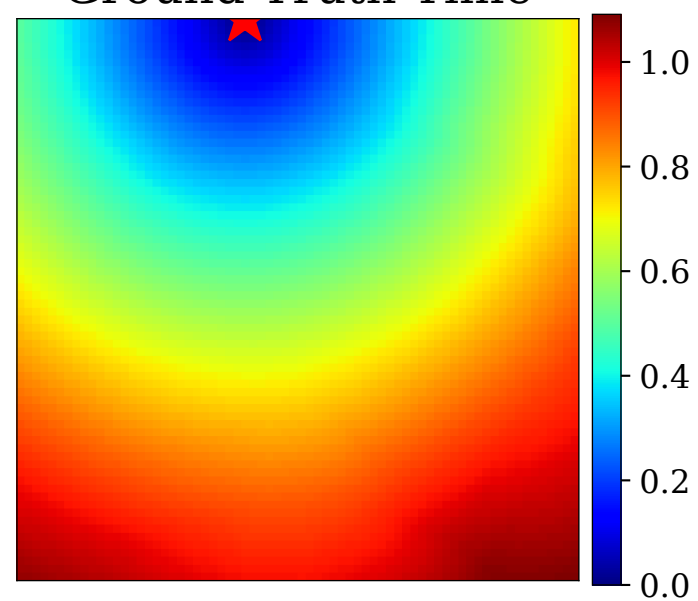

Predicted Time

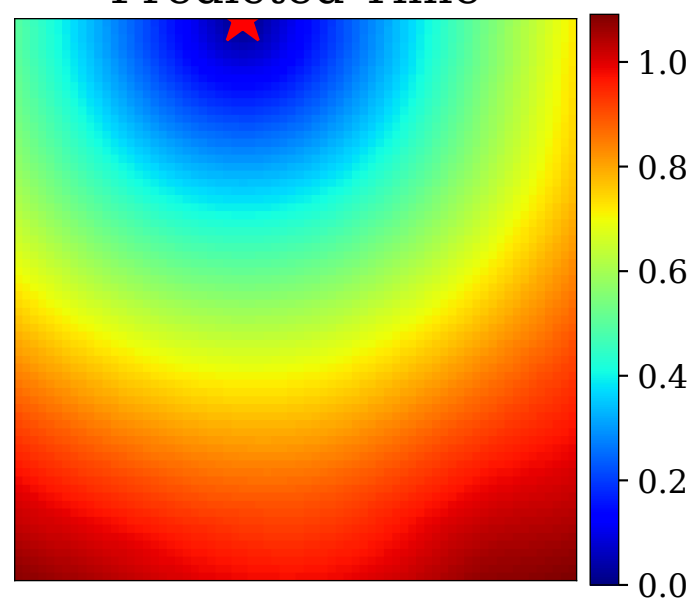

Absolute Error

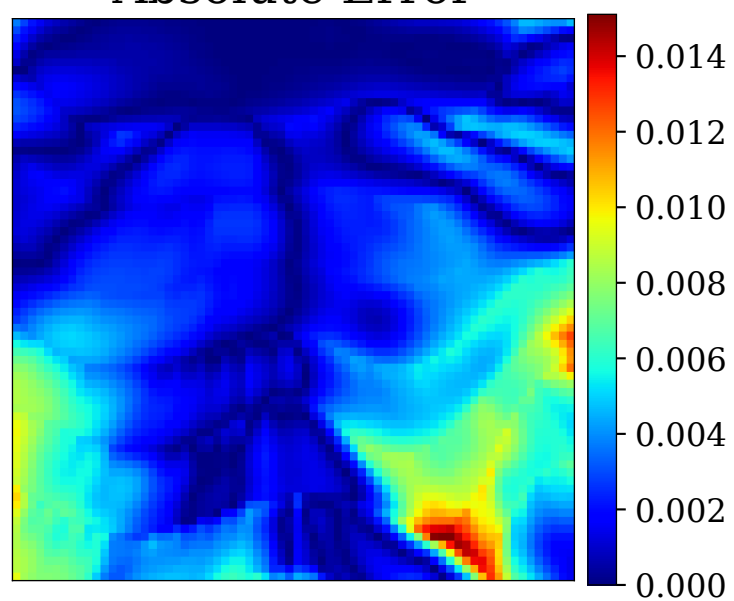

Supplement: supplementary_material [file gt_comp_top_99_(2, 0).pdf › EikonalENF_Jax-clean/experiments/fitting/figures/fwi_curvevel_a/test/gt_comp_top_99_(2, 0).pdf]

Velocity Field

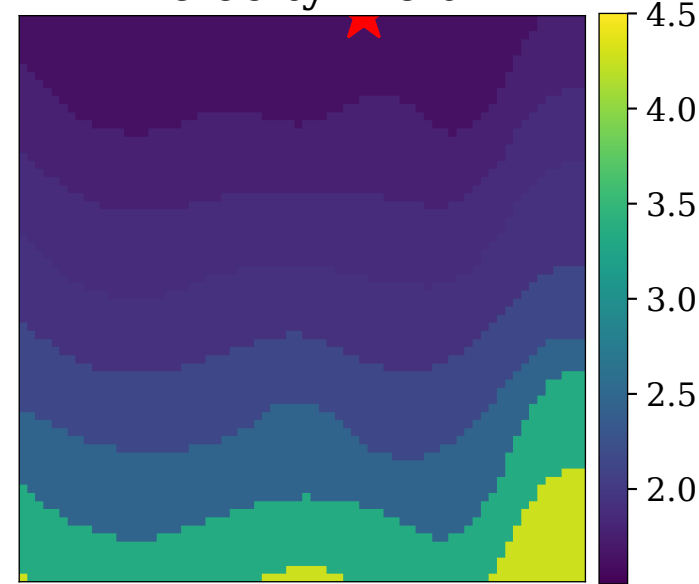

Ground Truth Time

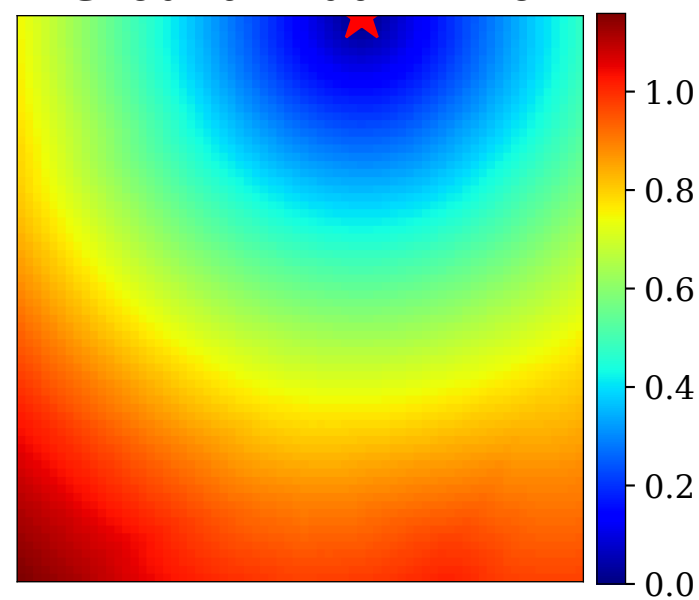

Predicted Time

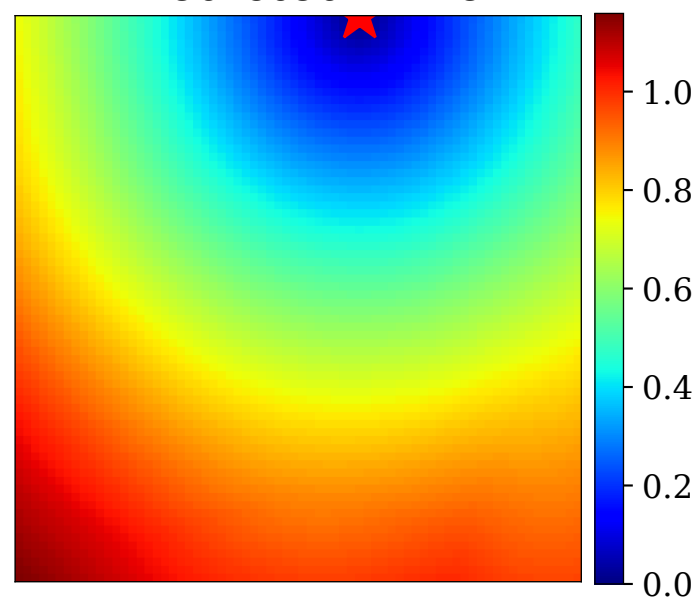

Absolute Error

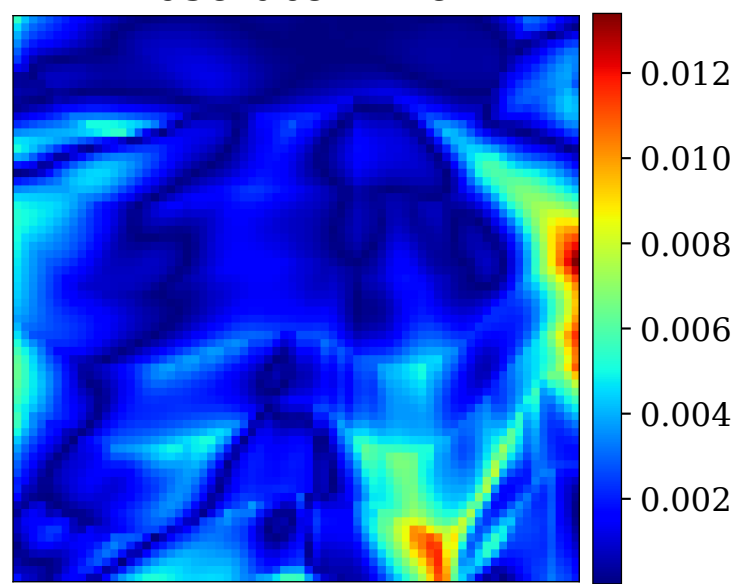

Supplement: supplementary_material [file gt_comp_top_99_(3, 0).pdf › EikonalENF_Jax-clean/experiments/fitting/figures/fwi_curvevel_a/test/gt_comp_top_99_(3, 0).pdf]

Velocity Field

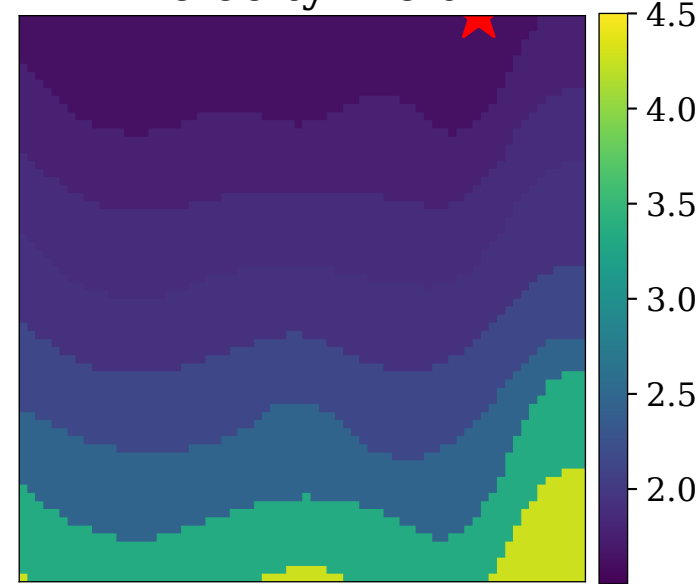

Ground Truth Time

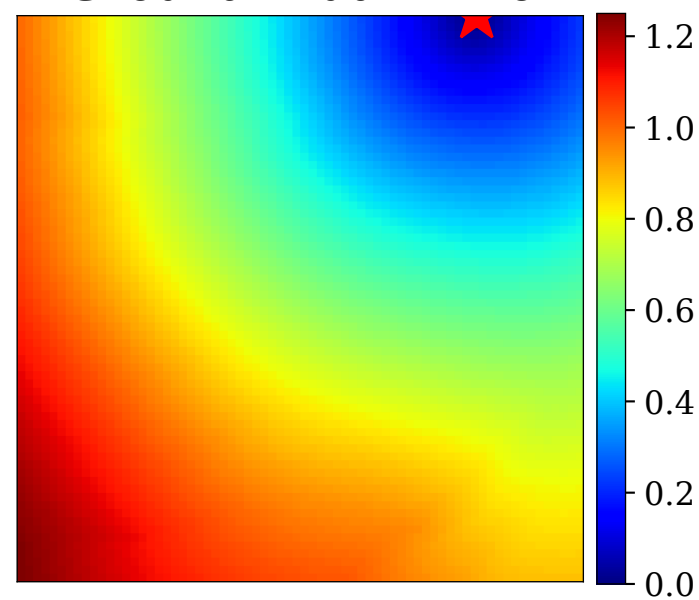

Predicted Time

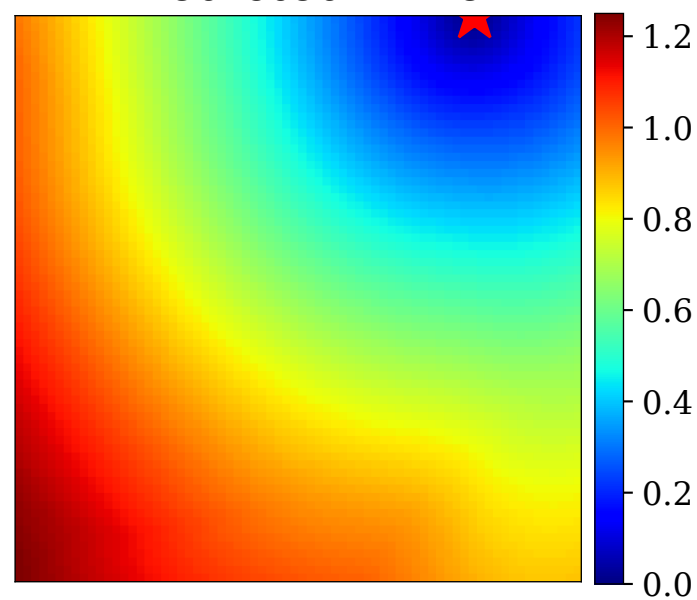

Absolute Error

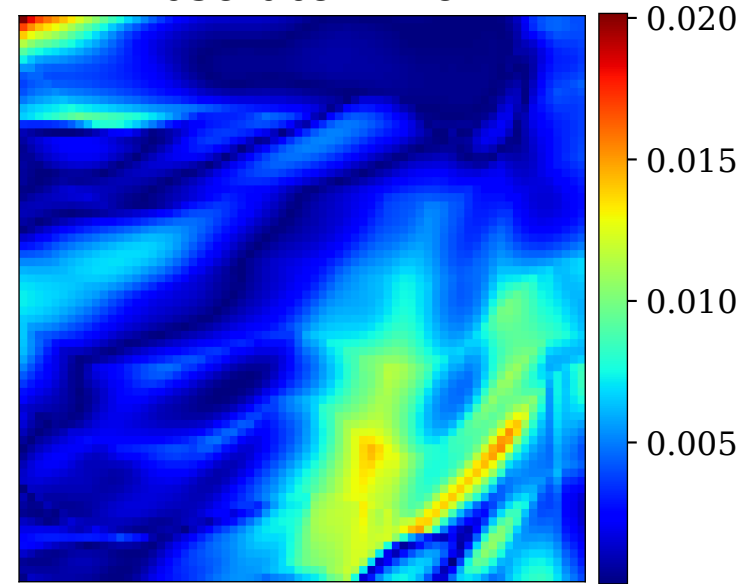

Supplement: supplementary_material [file gt_comp_top_99_(4, 0).pdf › EikonalENF_Jax-clean/experiments/fitting/figures/fwi_curvevel_a/test/gt_comp_top_99_(4, 0).pdf]

Velocity Field

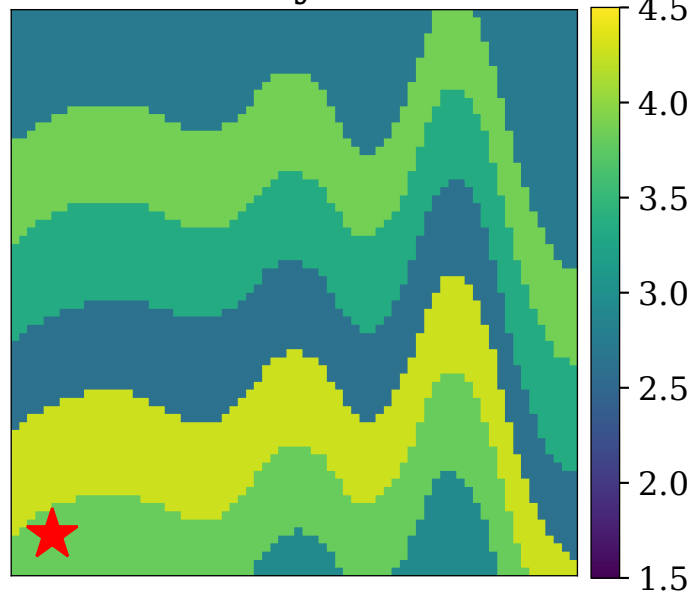

Ground Truth Time

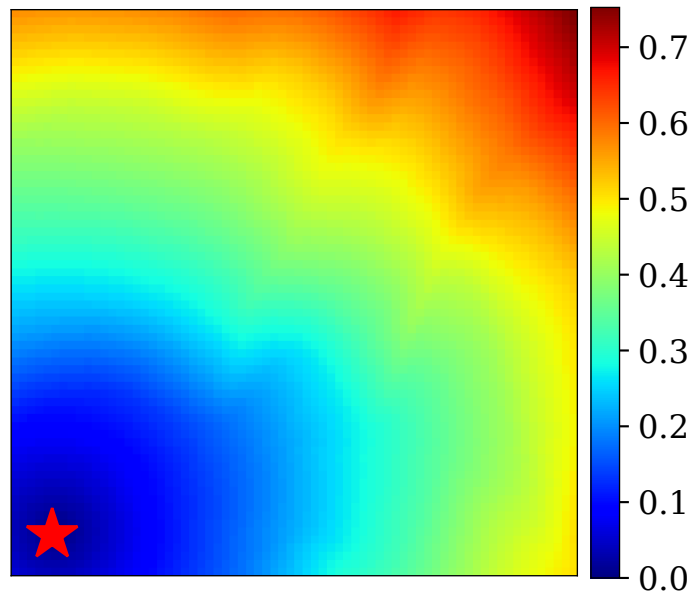

Predicted Time

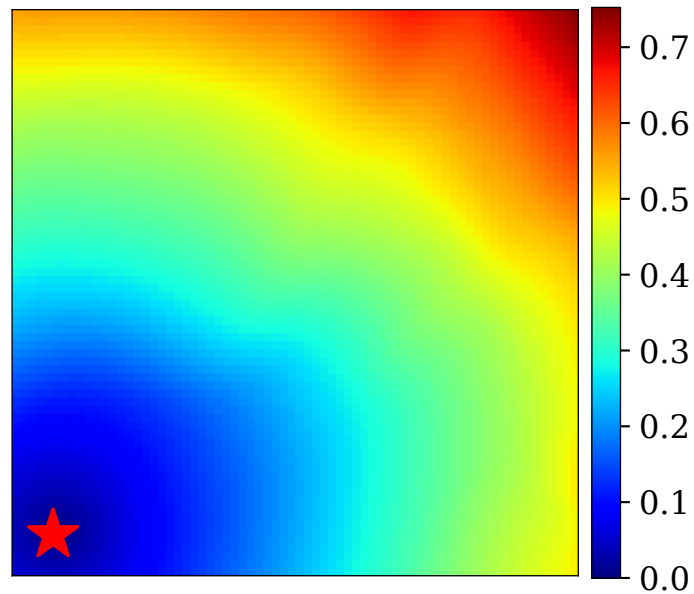

Absolute Error

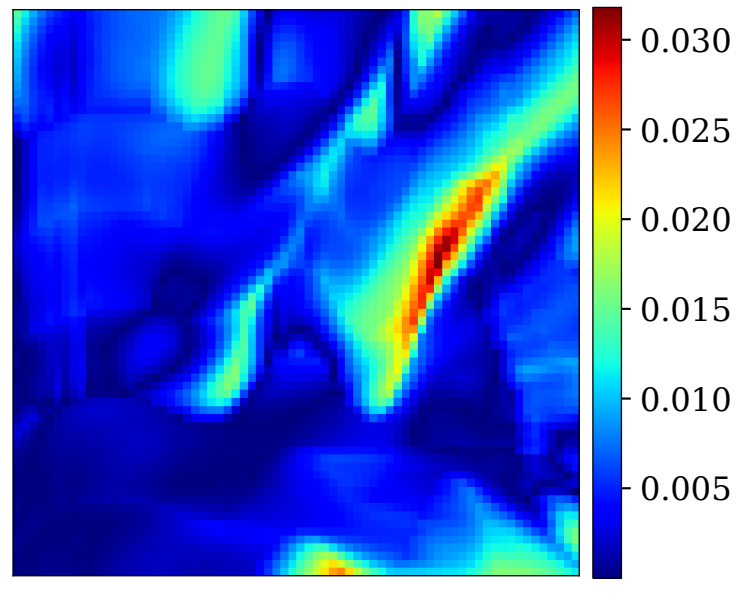

Supplement: supplementary_material [file gt_comp_full_98_(1, 1).pdf › EikonalENF_Jax-clean/experiments/fitting/figures/fwi_curvevel_b/test/gt_comp_full_98_(1, 1).pdf]

Velocity Field

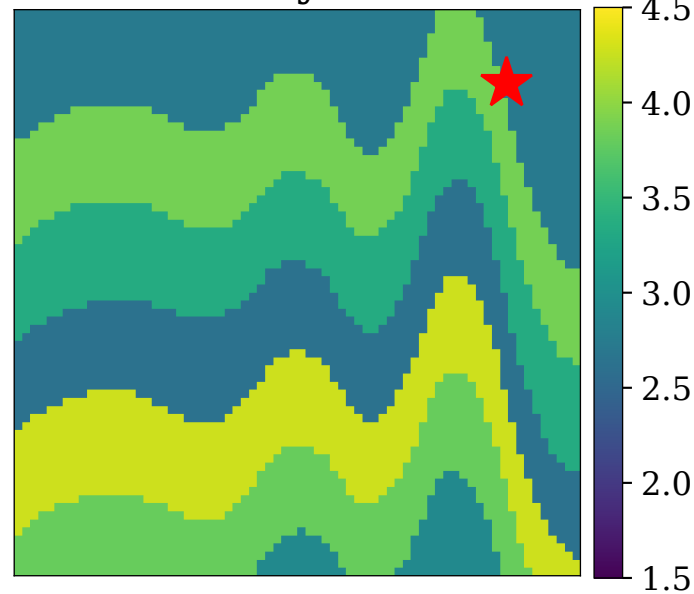

Ground Truth Time

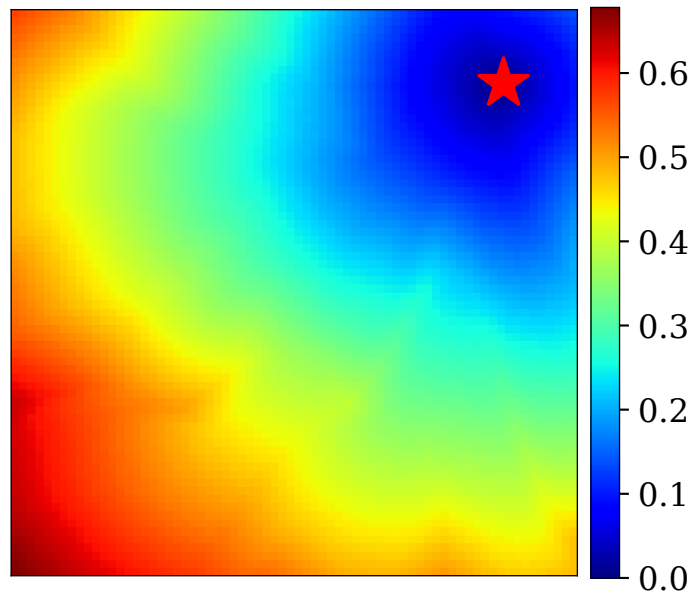

Predicted Time

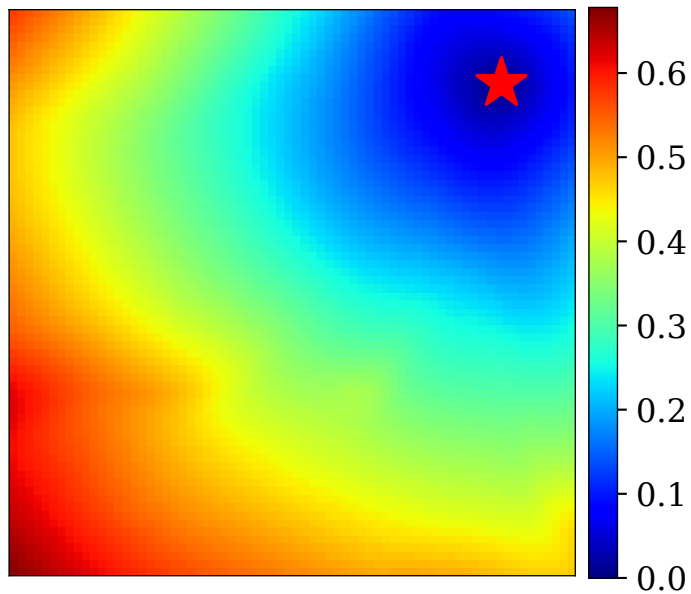

Absolute Error

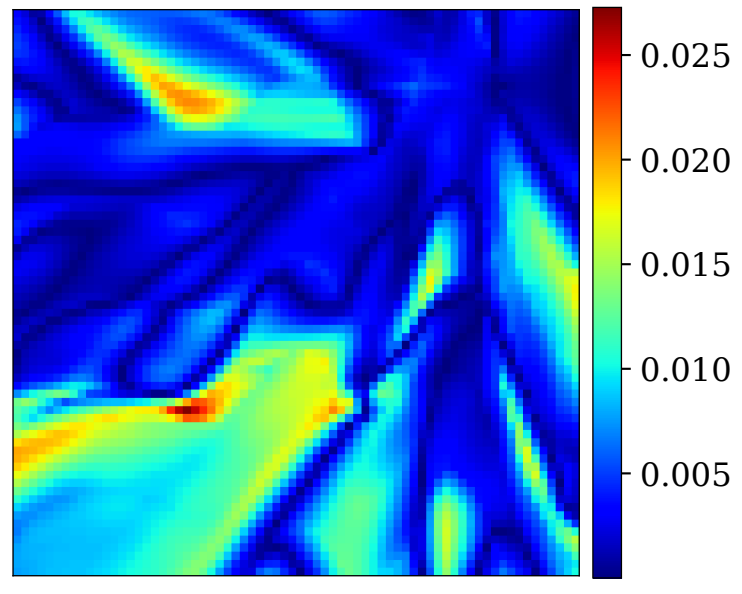

Supplement: supplementary_material [file gt_comp_full_98_(12, 12).pdf › EikonalENF_Jax-clean/experiments/fitting/figures/fwi_curvevel_b/test/gt_comp_full_98_(12, 12).pdf]

Velocity Field

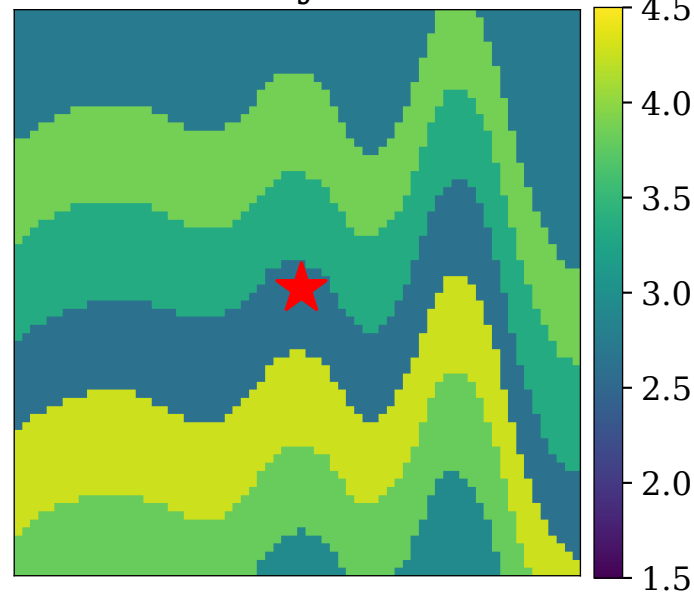

Ground Truth Time

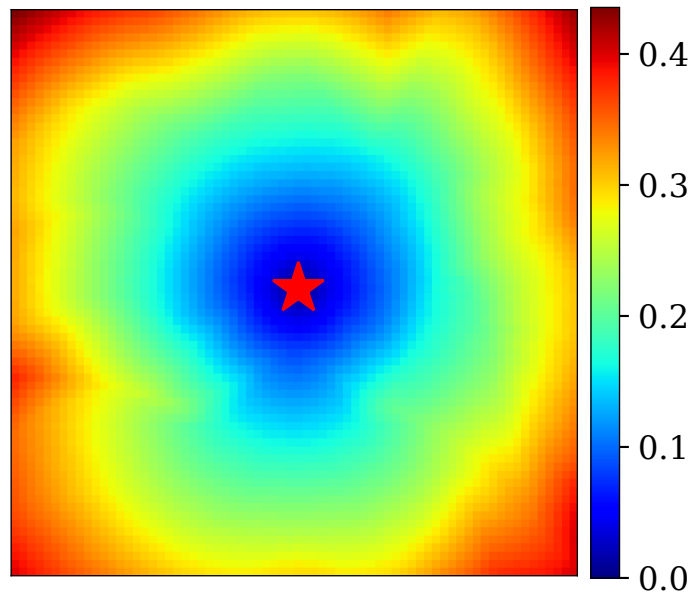

Predicted Time

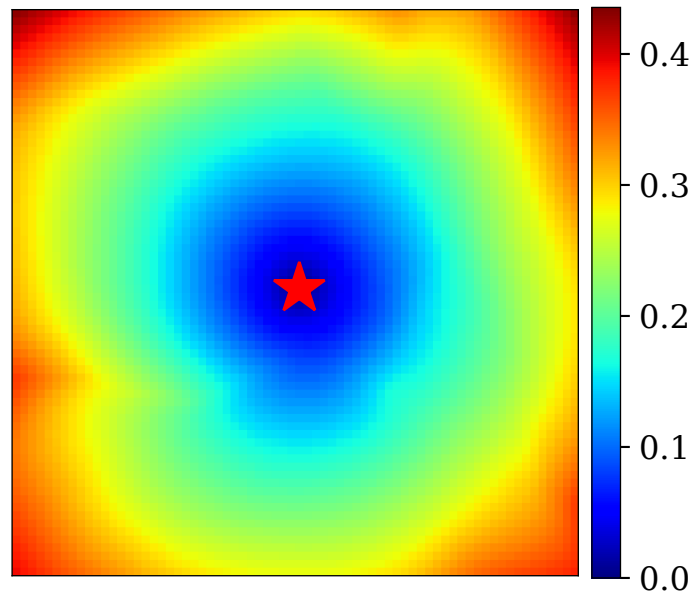

Absolute Error

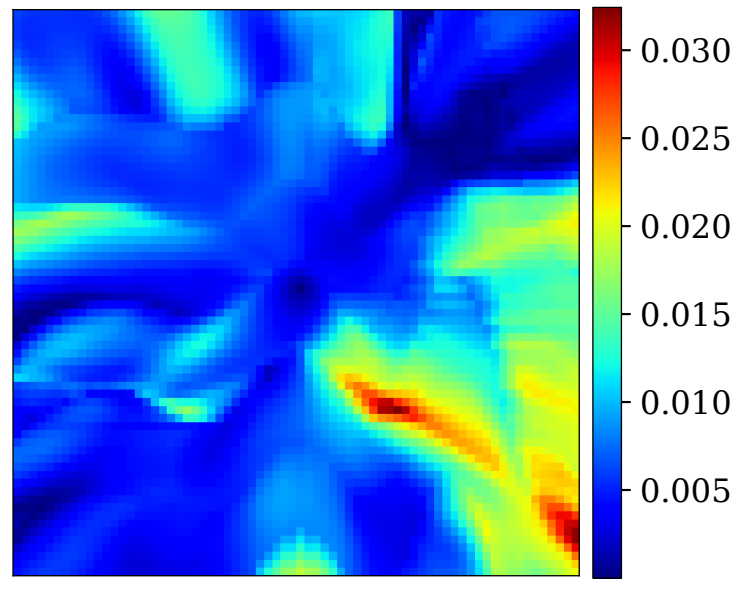

Supplement: supplementary_material [file gt_comp_full_98_(7, 7).pdf › EikonalENF_Jax-clean/experiments/fitting/figures/fwi_curvevel_b/test/gt_comp_full_98_(7, 7).pdf]

Velocity Field

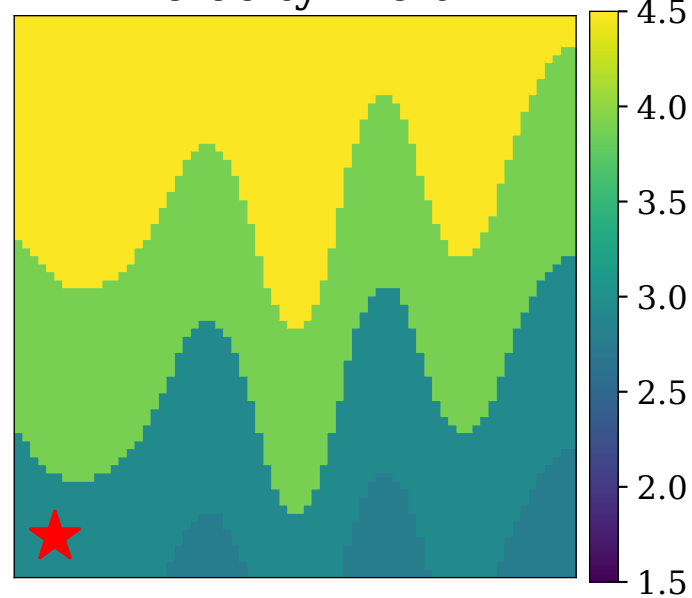

Ground Truth Time

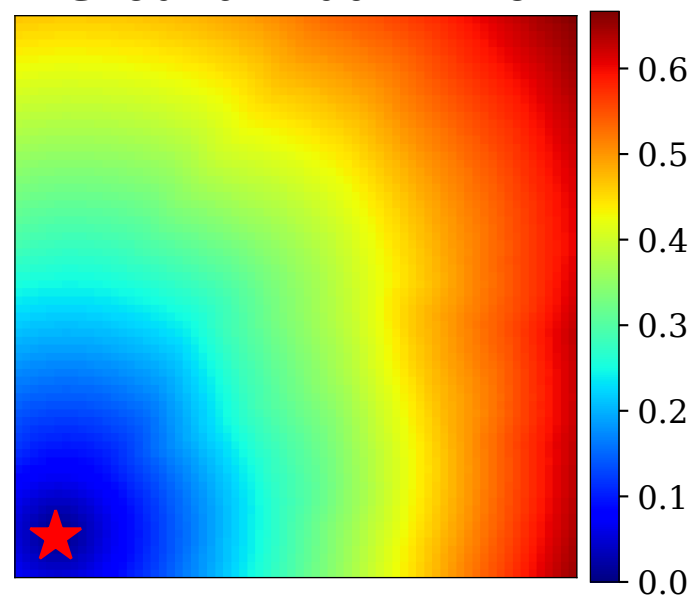

Predicted Time

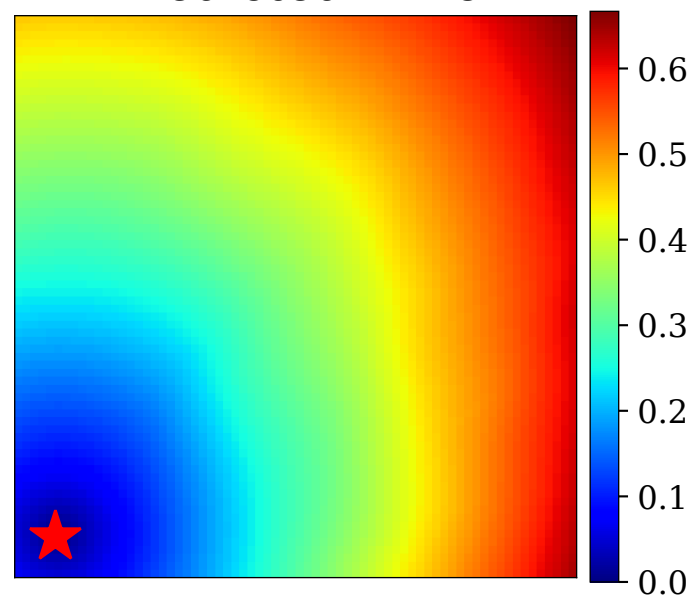

Absolute Error

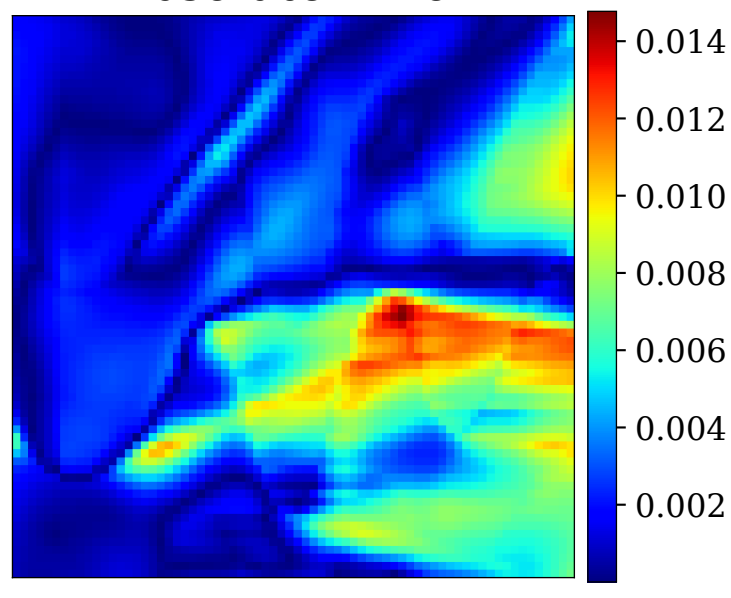

Supplement: supplementary_material [file gt_comp_full_99_(1, 1).pdf › EikonalENF_Jax-clean/experiments/fitting/figures/fwi_curvevel_b/test/gt_comp_full_99_(1, 1).pdf]

Velocity Field

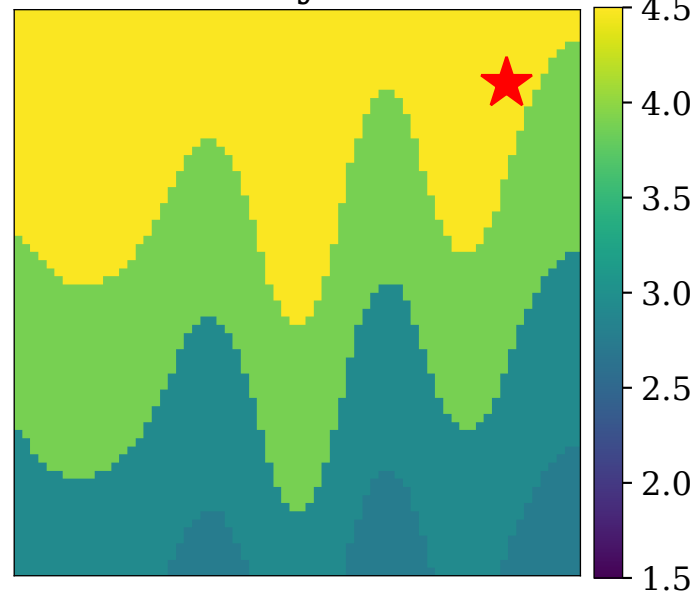

Ground Truth Time

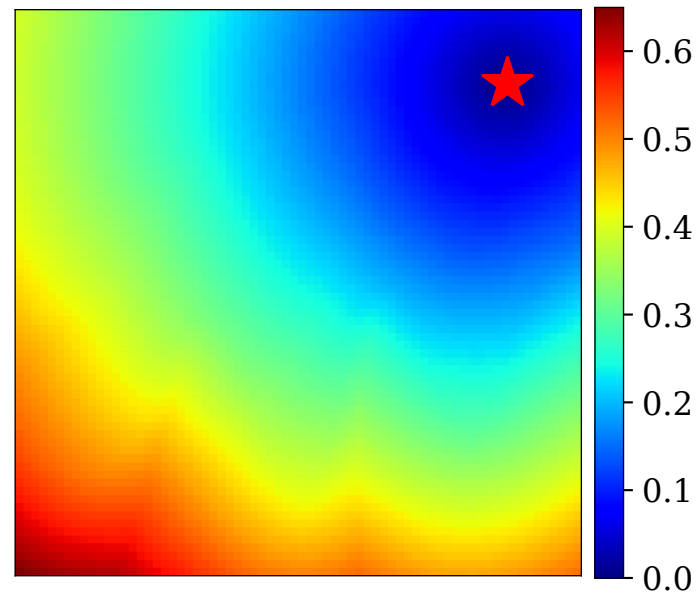

Predicted Time

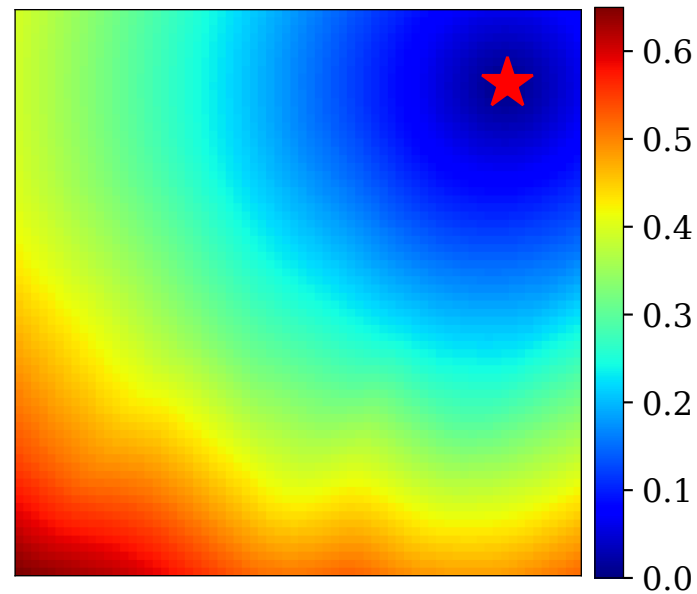

Absolute Error

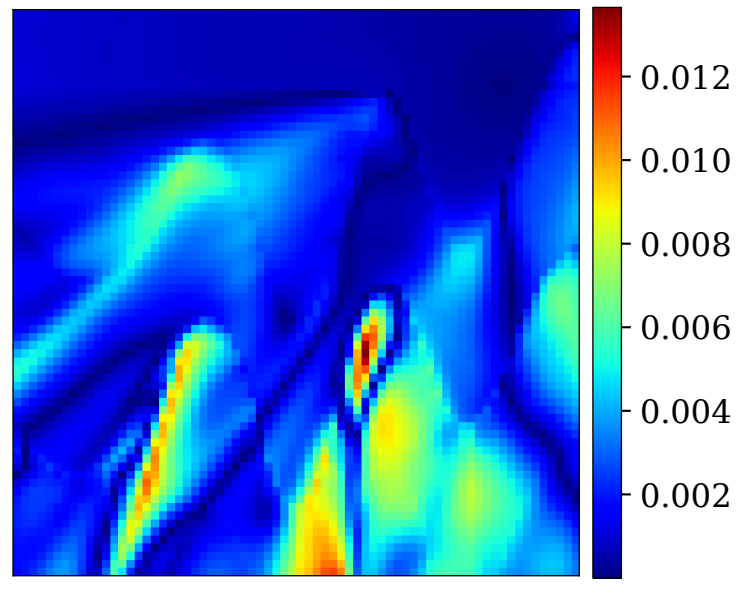

Supplement: supplementary_material [file gt_comp_full_99_(12, 12).pdf › EikonalENF_Jax-clean/experiments/fitting/figures/fwi_curvevel_b/test/gt_comp_full_99_(12, 12).pdf]

Velocity Field

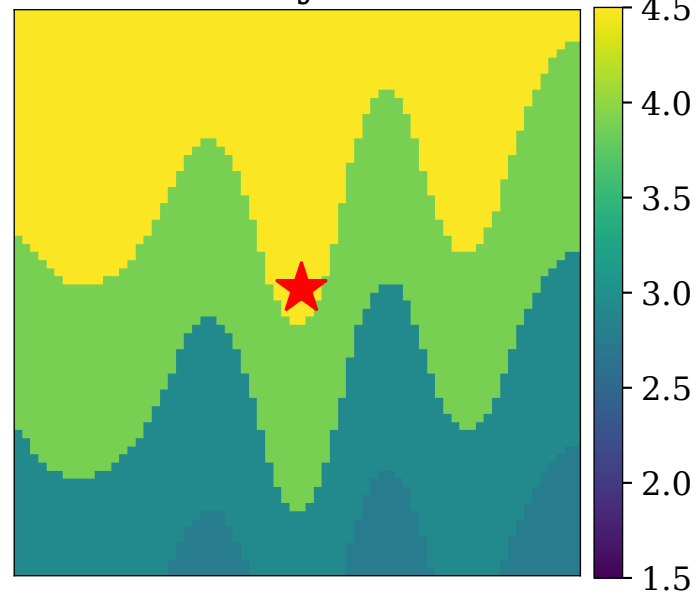

Ground Truth Time

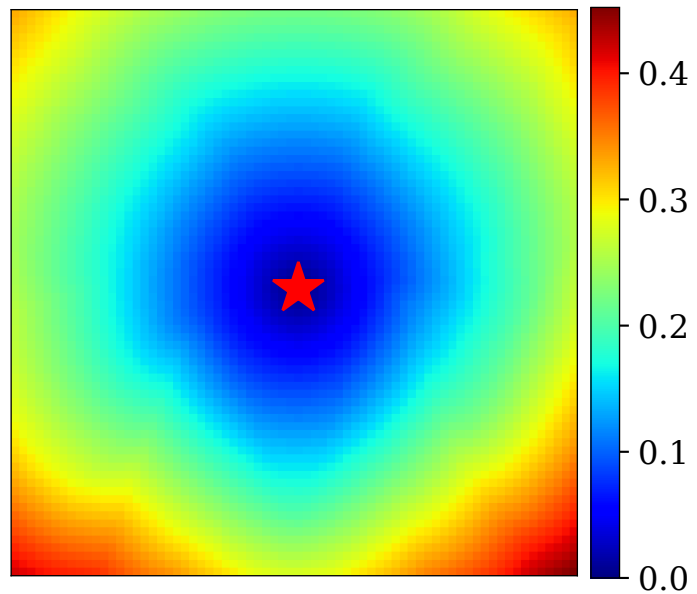

Predicted Time

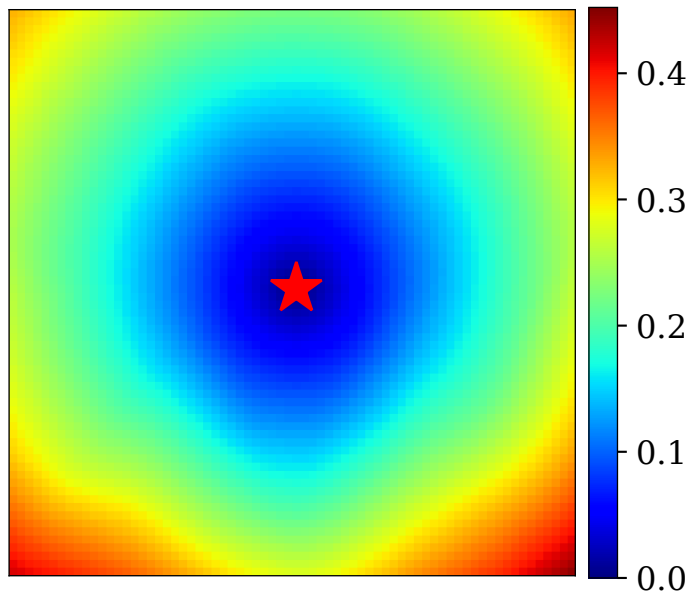

Absolute Error

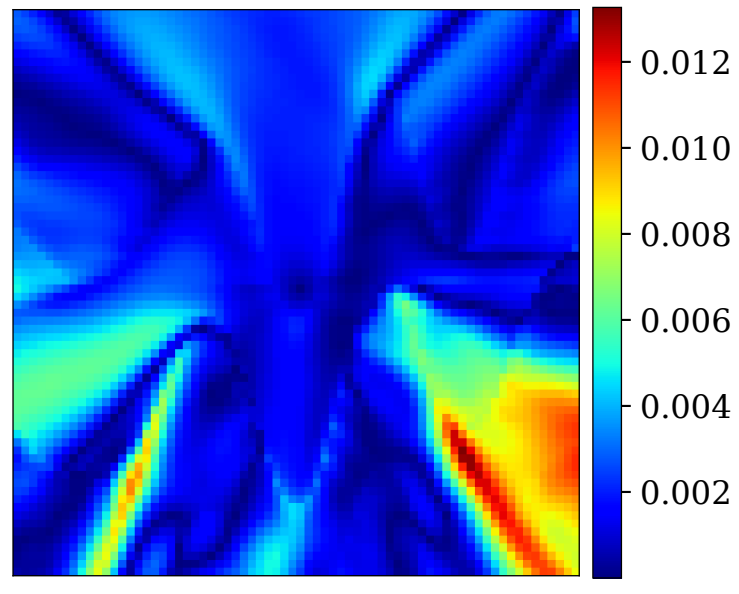

Supplement: supplementary_material [file gt_comp_full_99_(7, 7).pdf › EikonalENF_Jax-clean/experiments/fitting/figures/fwi_curvevel_b/test/gt_comp_full_99_(7, 7).pdf]

Velocity Field

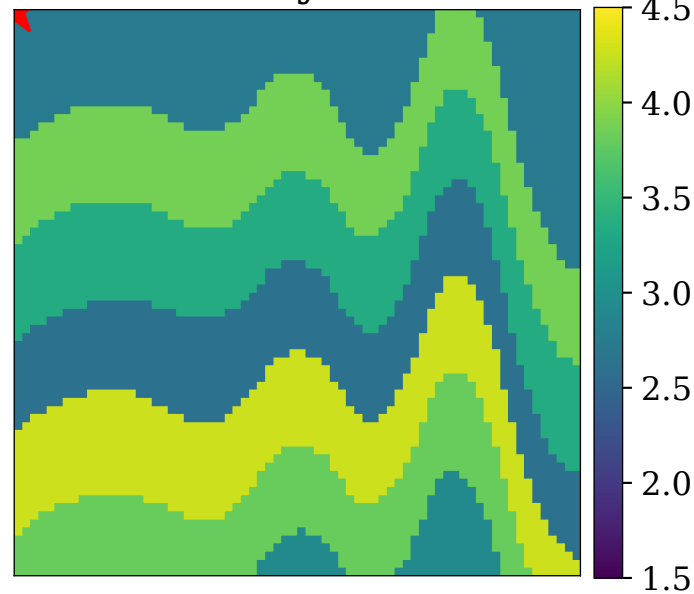

Ground Truth Time

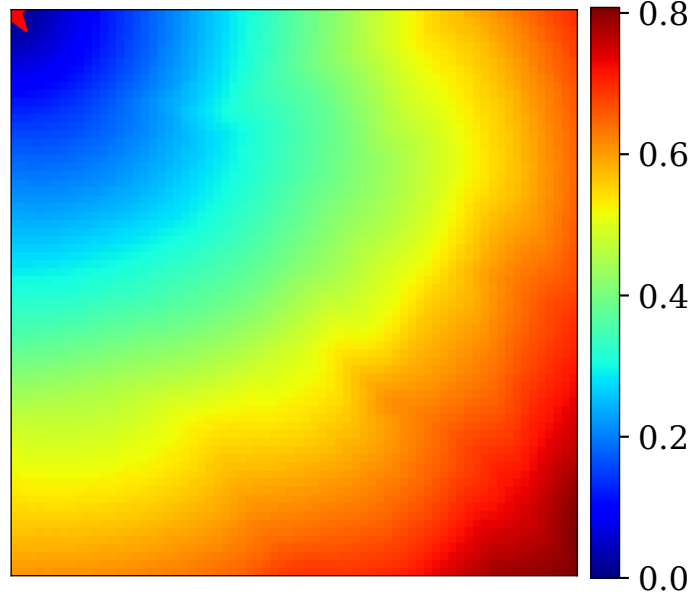

Predicted Time

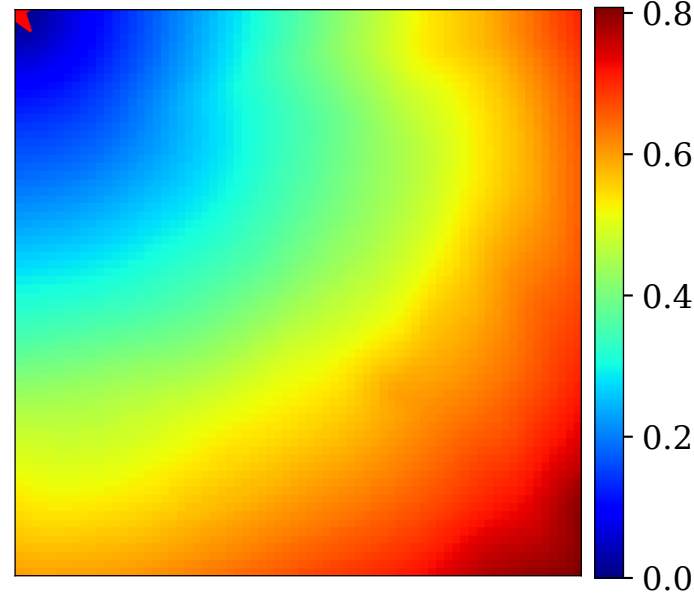

Absolute Error

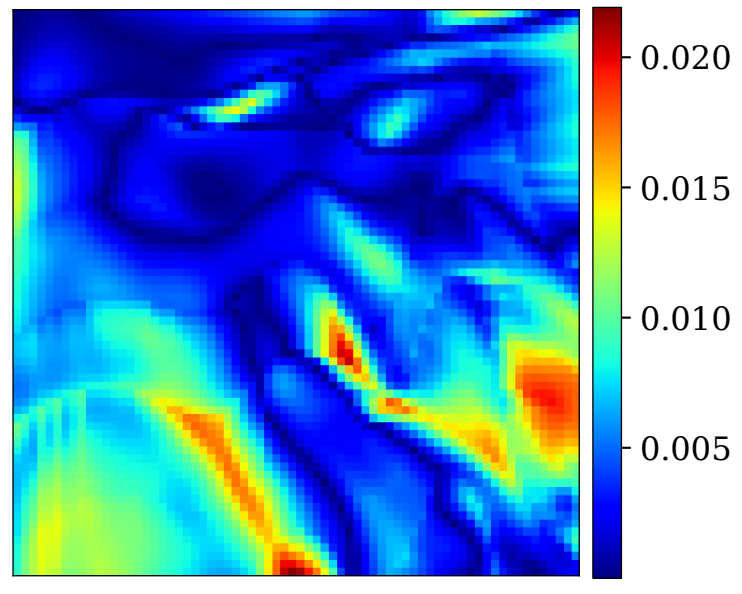

Supplement: supplementary_material [file gt_comp_top_98_(0, 0).pdf › EikonalENF_Jax-clean/experiments/fitting/figures/fwi_curvevel_b/test/gt_comp_top_98_(0, 0).pdf]

Velocity Field

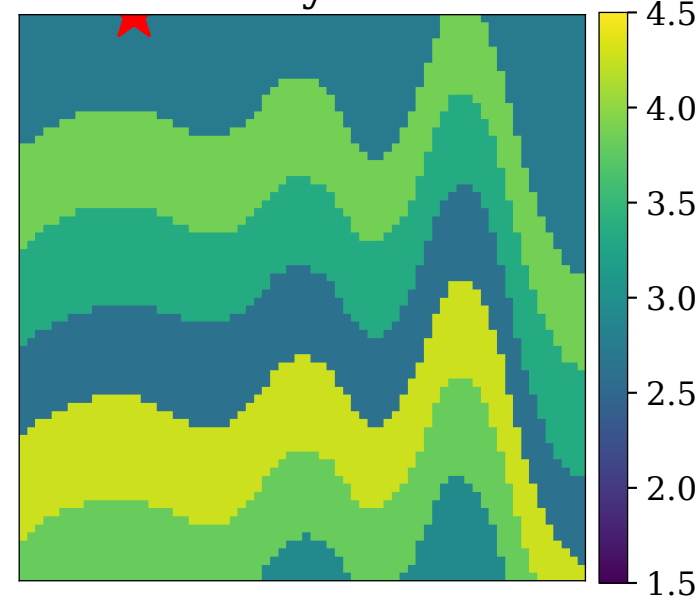

Ground Truth Time

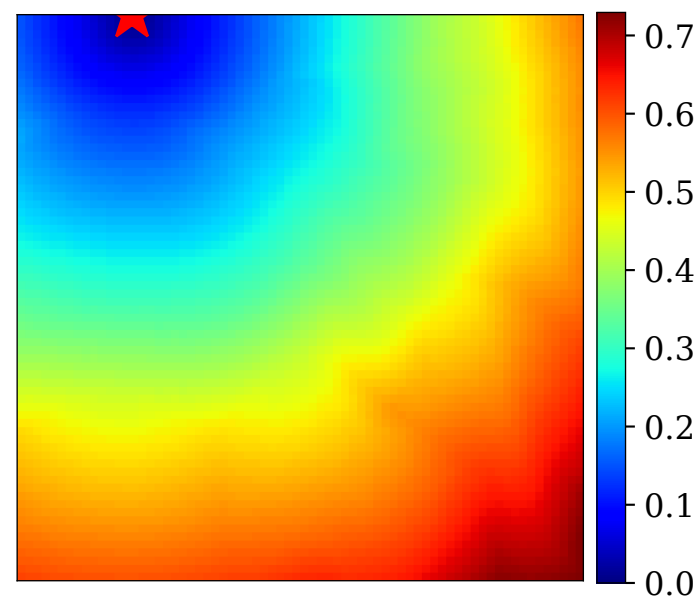

Predicted Time

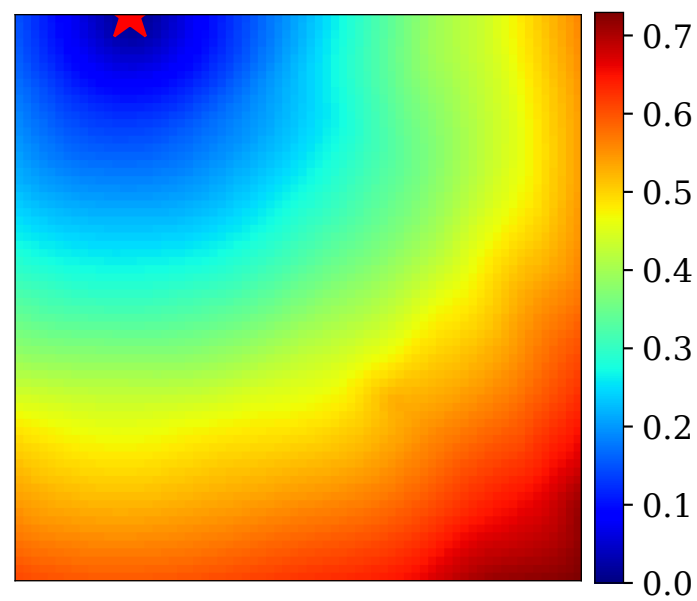

Absolute Error

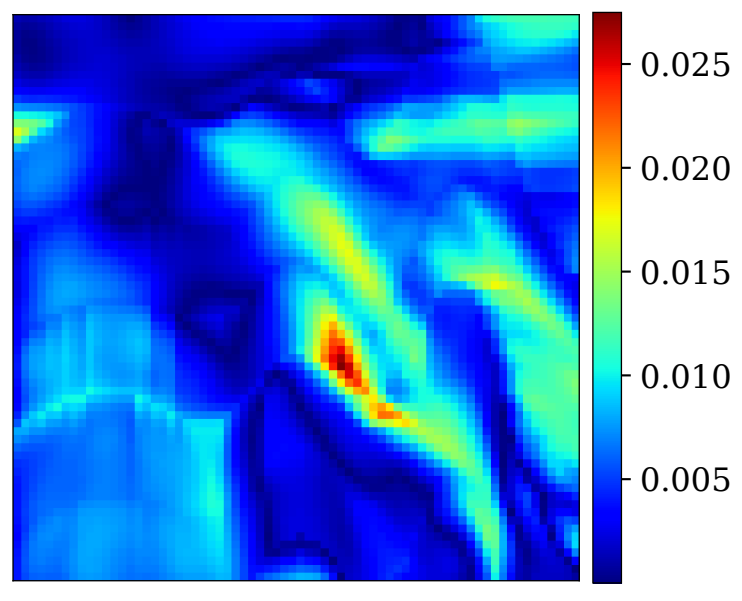

Supplement: supplementary_material [file gt_comp_top_98_(1, 0).pdf › EikonalENF_Jax-clean/experiments/fitting/figures/fwi_curvevel_b/test/gt_comp_top_98_(1, 0).pdf]

Velocity Field

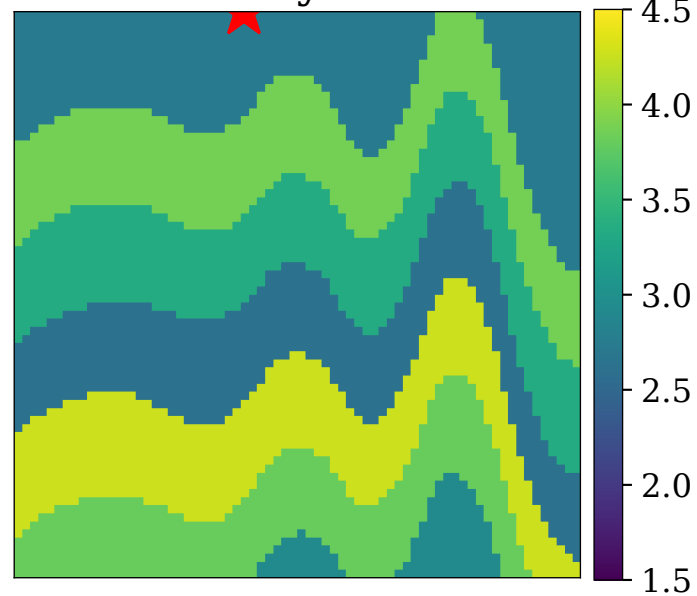

Ground Truth Time

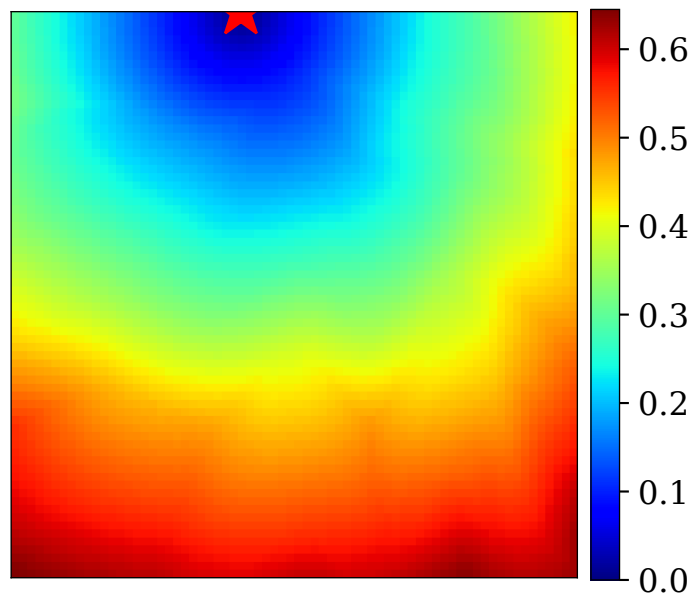

Predicted Time

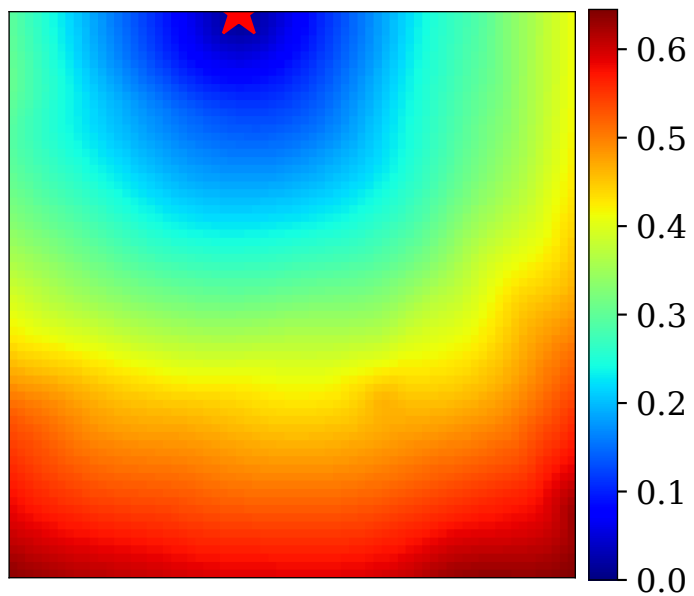

Absolute Error

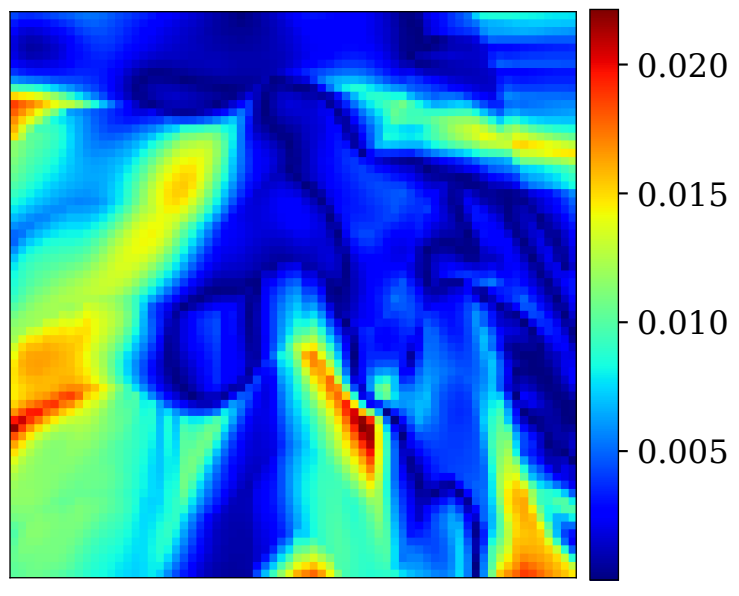

Supplement: supplementary_material [file gt_comp_top_98_(2, 0).pdf › EikonalENF_Jax-clean/experiments/fitting/figures/fwi_curvevel_b/test/gt_comp_top_98_(2, 0).pdf]

Velocity Field

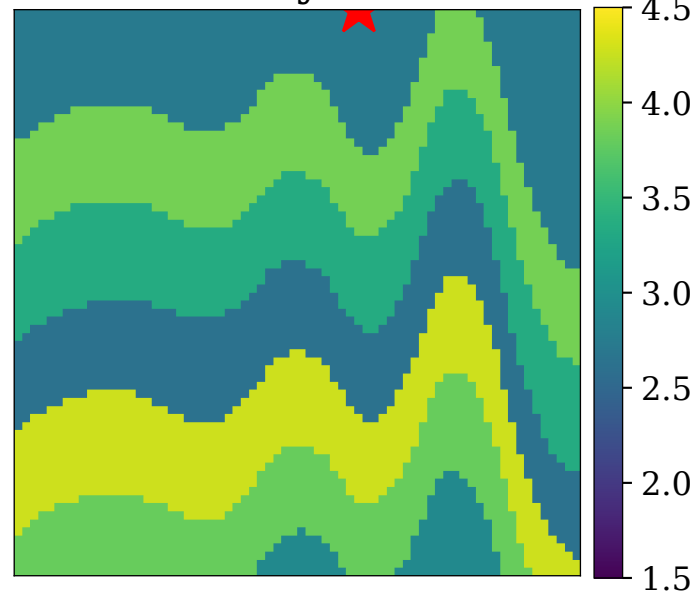

Ground Truth Time

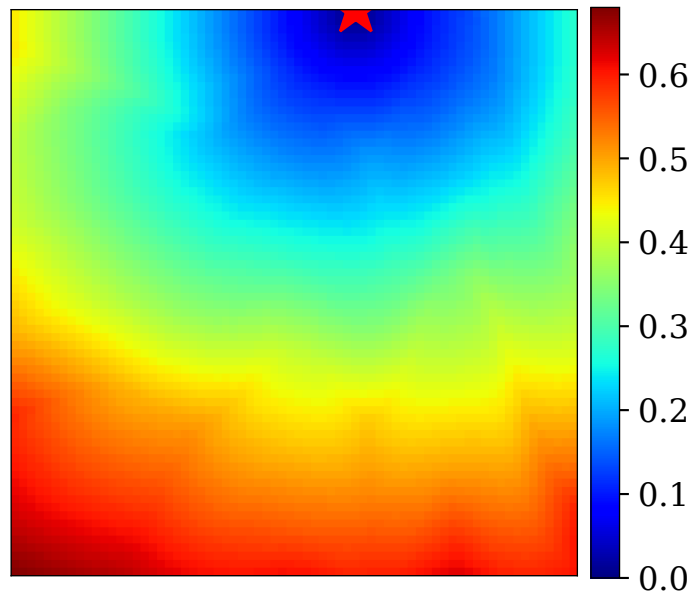

Predicted Time

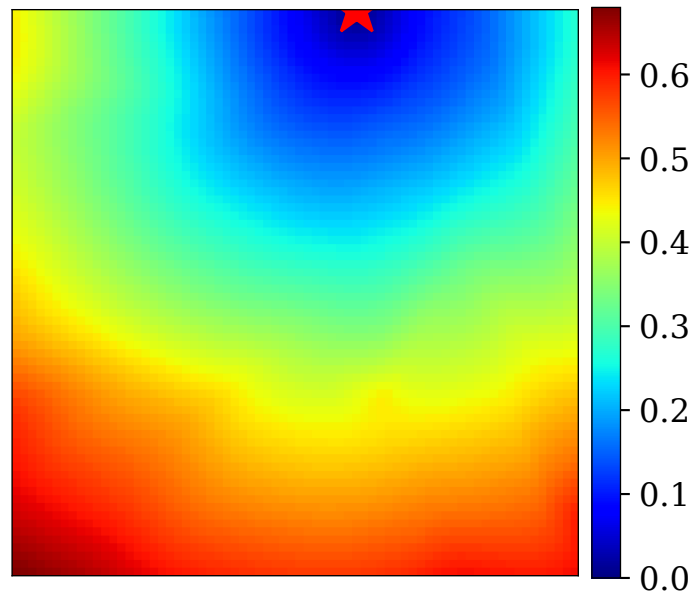

Absolute Error

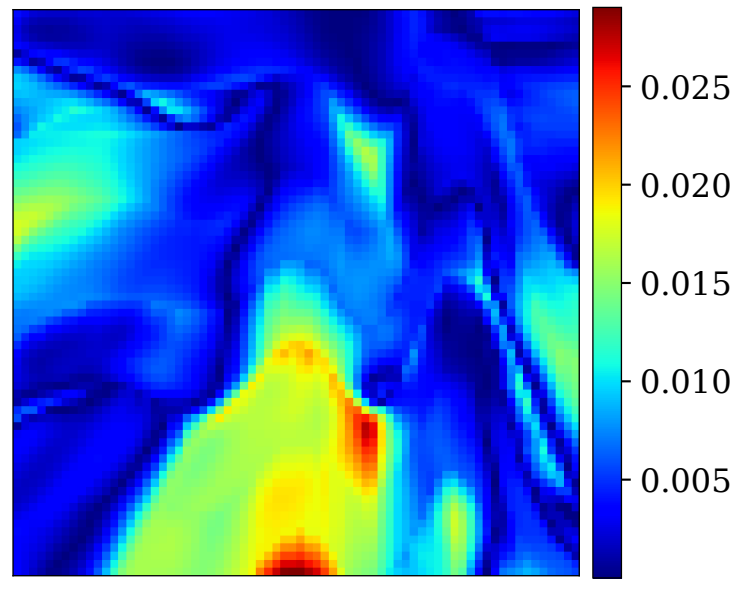

Supplement: supplementary_material [file gt_comp_top_98_(3, 0).pdf › EikonalENF_Jax-clean/experiments/fitting/figures/fwi_curvevel_b/test/gt_comp_top_98_(3, 0).pdf]

Velocity Field

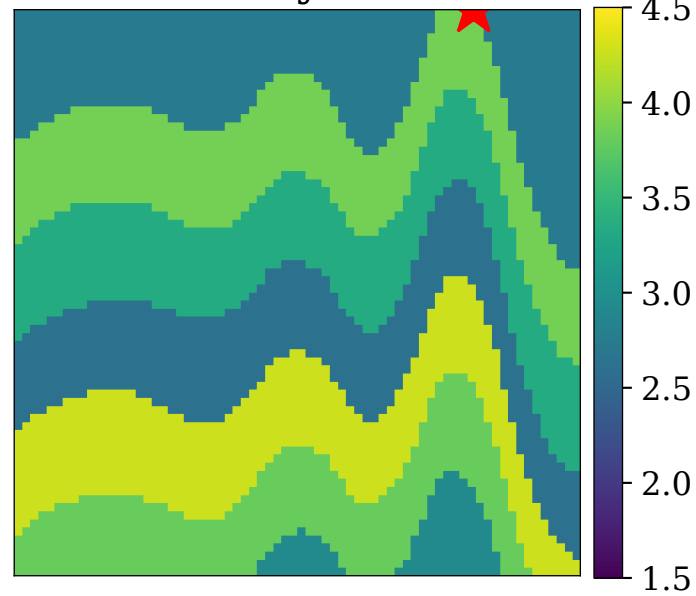

Ground Truth Time

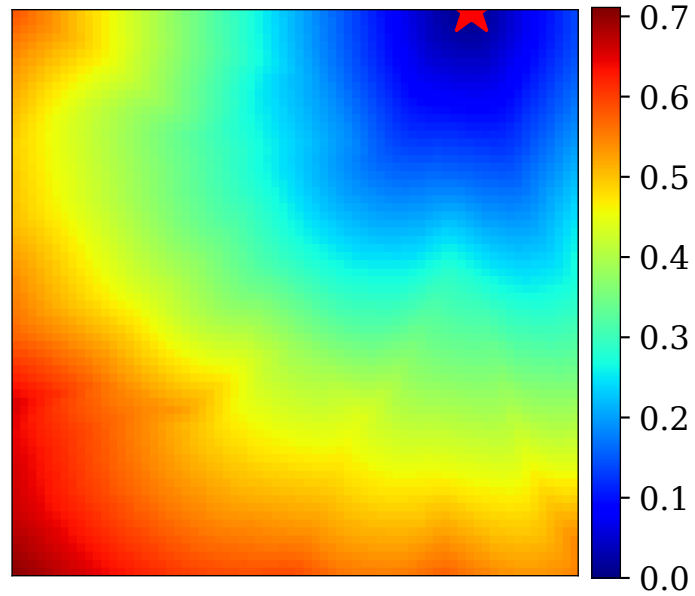

Predicted Time

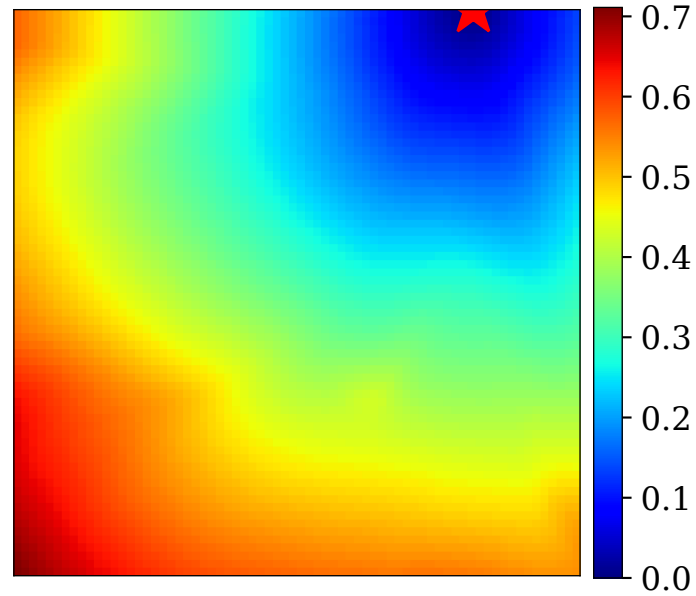

Absolute Error

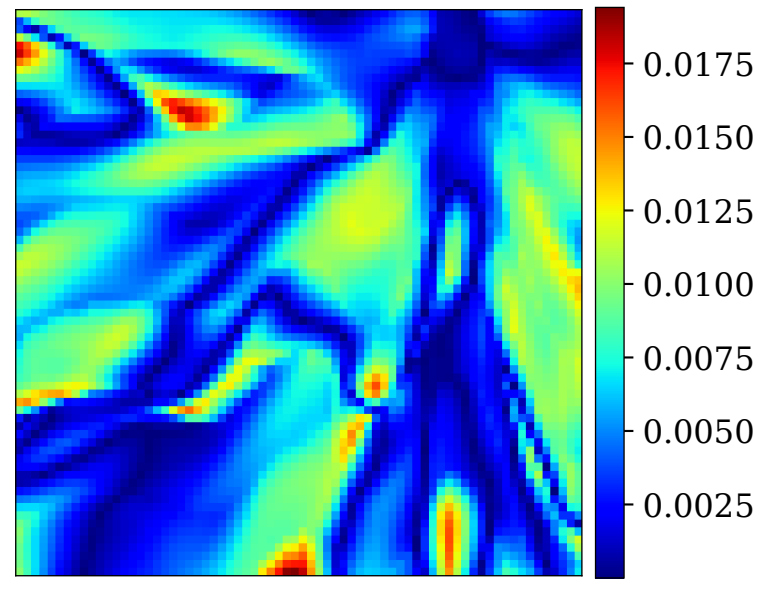

Supplement: supplementary_material [file gt_comp_top_98_(4, 0).pdf › EikonalENF_Jax-clean/experiments/fitting/figures/fwi_curvevel_b/test/gt_comp_top_98_(4, 0).pdf]

Velocity Field

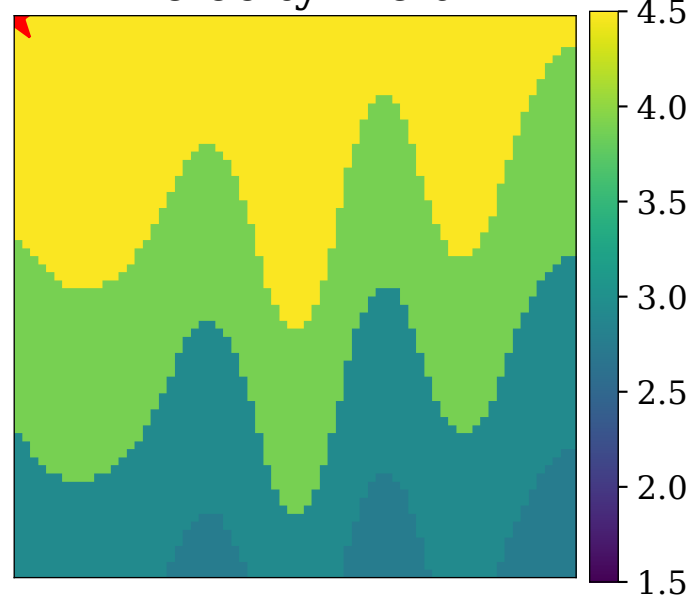

Ground Truth Time

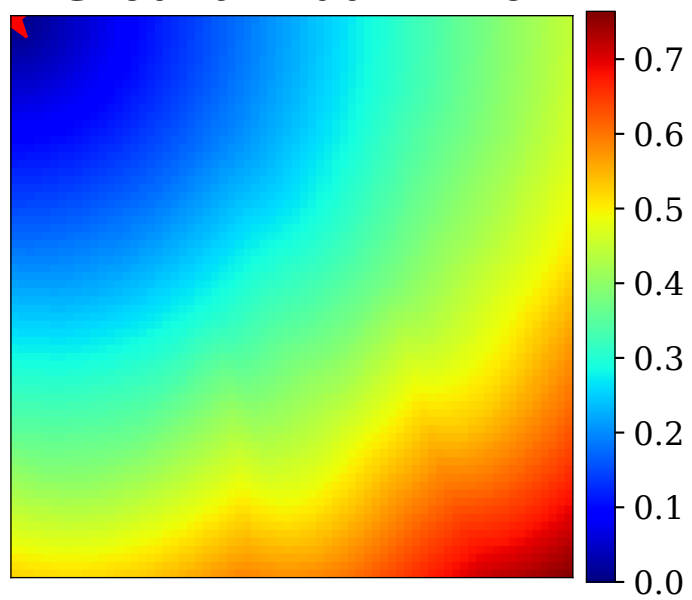

Predicted Time

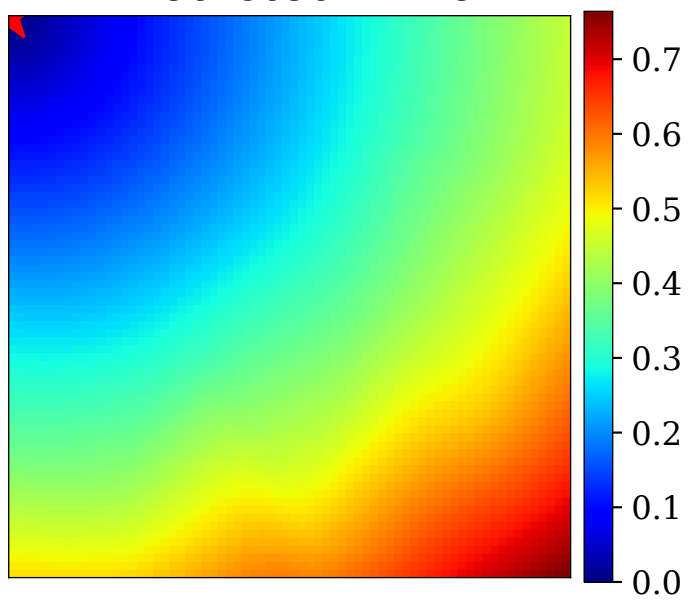

Absolute Error

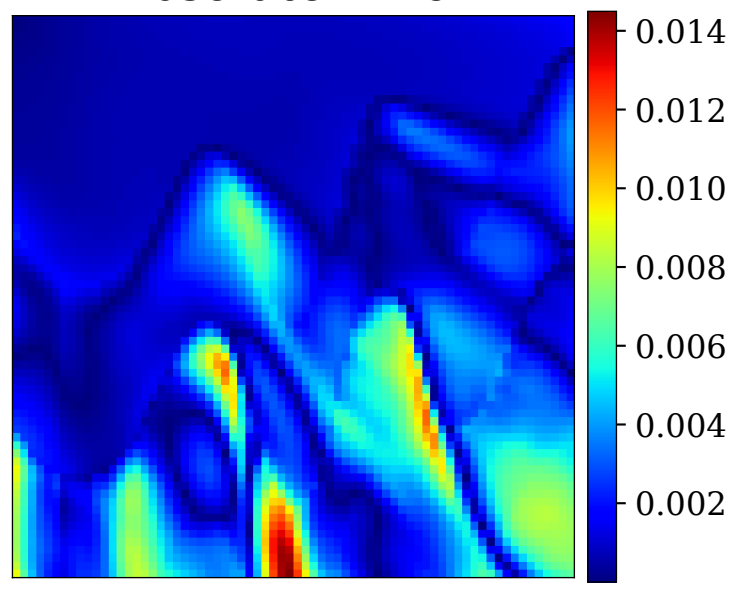

Supplement: supplementary_material [file gt_comp_top_99_(0, 0).pdf › EikonalENF_Jax-clean/experiments/fitting/figures/fwi_curvevel_b/test/gt_comp_top_99_(0, 0).pdf]

Velocity Field

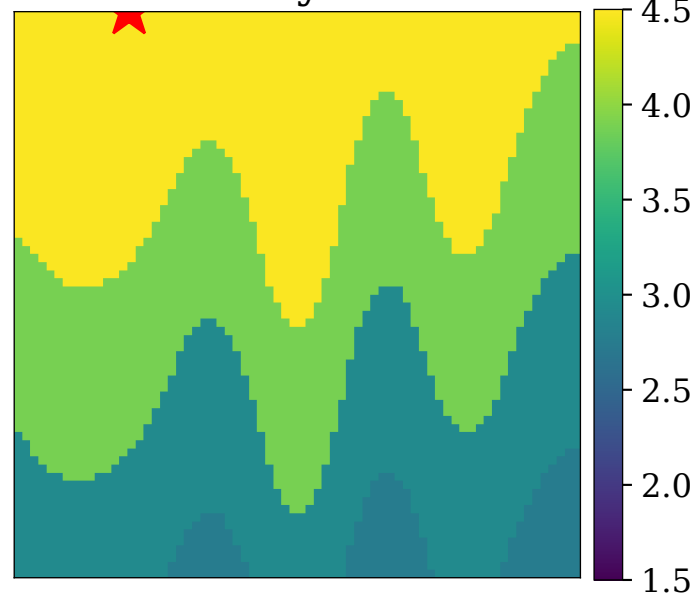

Ground Truth Time

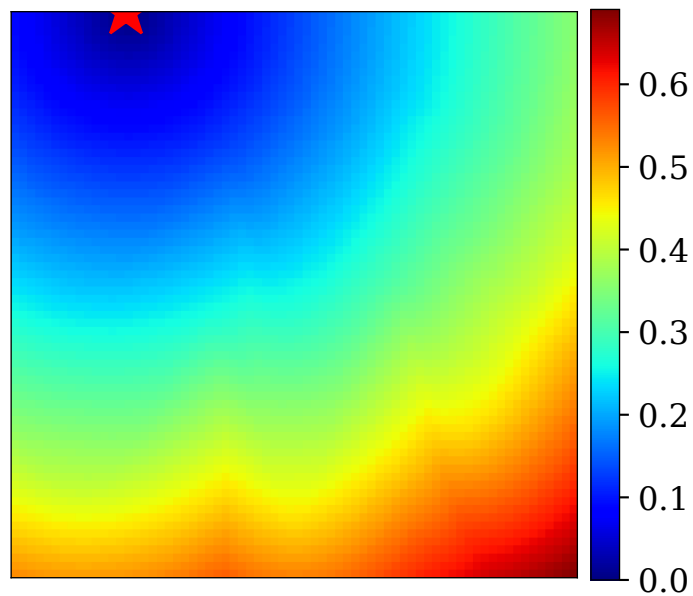

Predicted Time

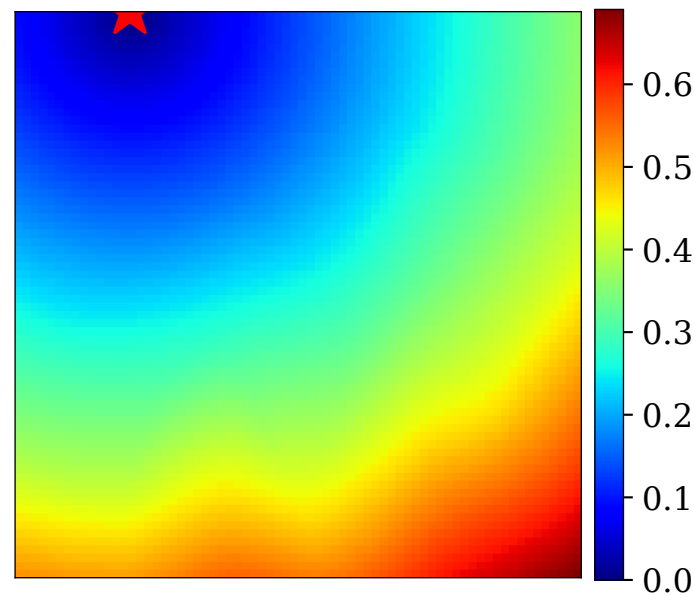

Absolute Error

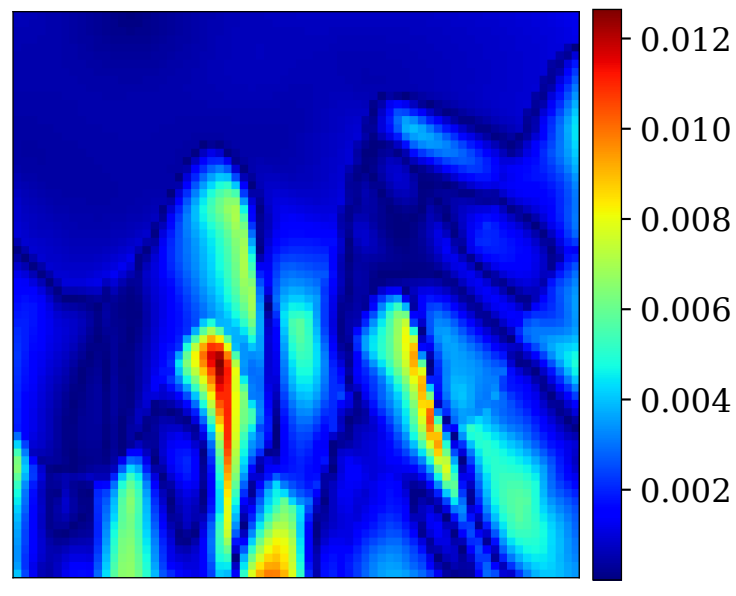

Supplement: supplementary_material [file gt_comp_top_99_(1, 0).pdf › EikonalENF_Jax-clean/experiments/fitting/figures/fwi_curvevel_b/test/gt_comp_top_99_(1, 0).pdf]

Velocity Field

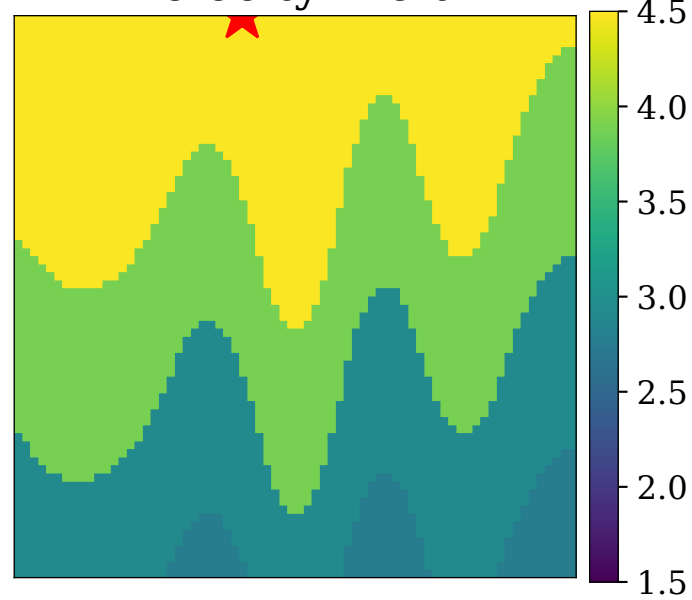

Ground Truth Time

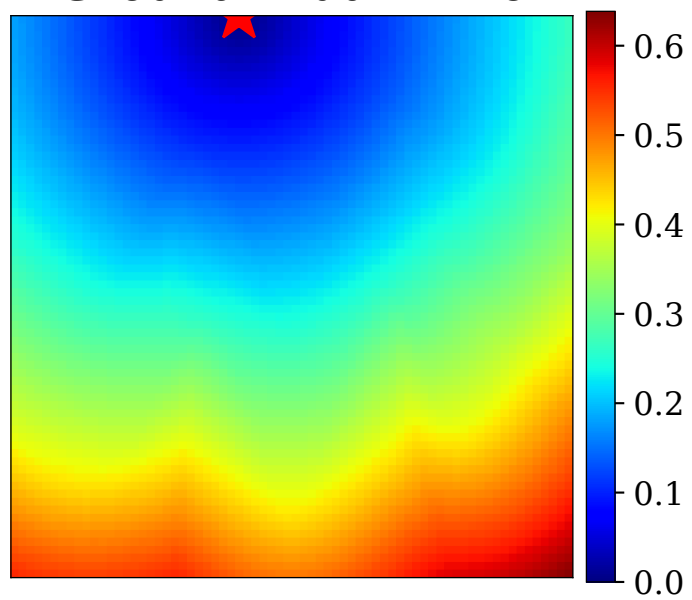

Predicted Time

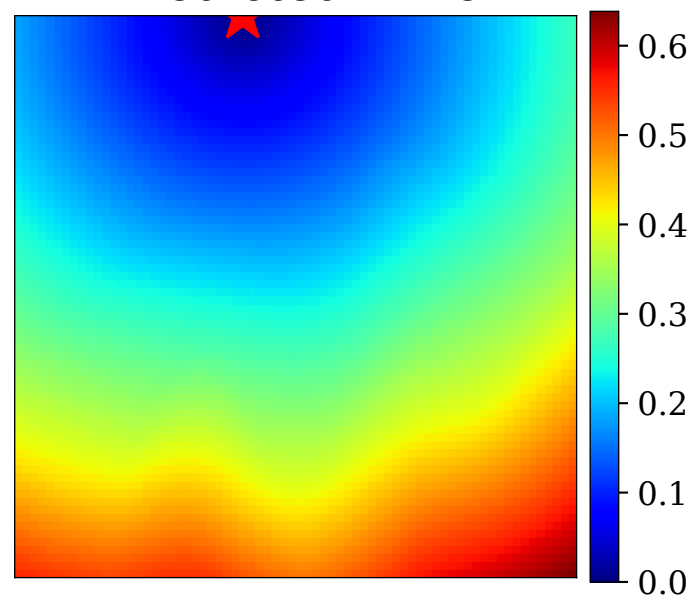

Absolute Error

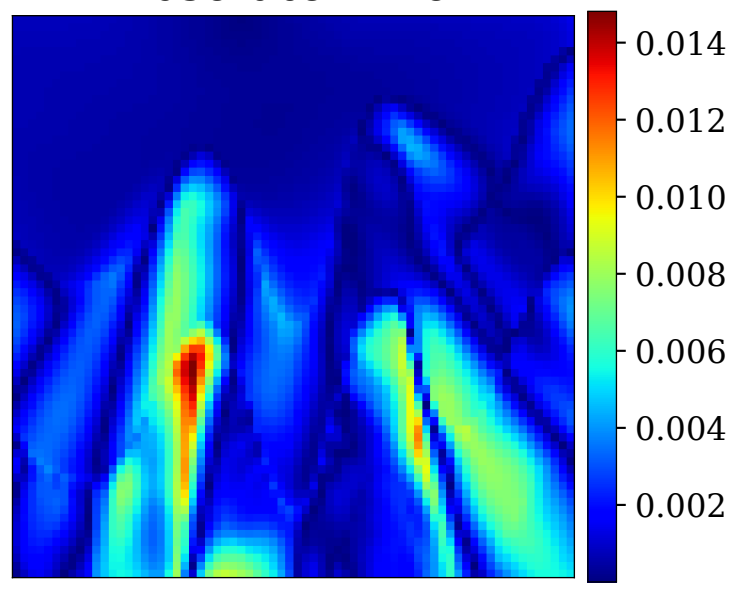

Supplement: supplementary_material [file gt_comp_top_99_(2, 0).pdf › EikonalENF_Jax-clean/experiments/fitting/figures/fwi_curvevel_b/test/gt_comp_top_99_(2, 0).pdf]

Velocity Field

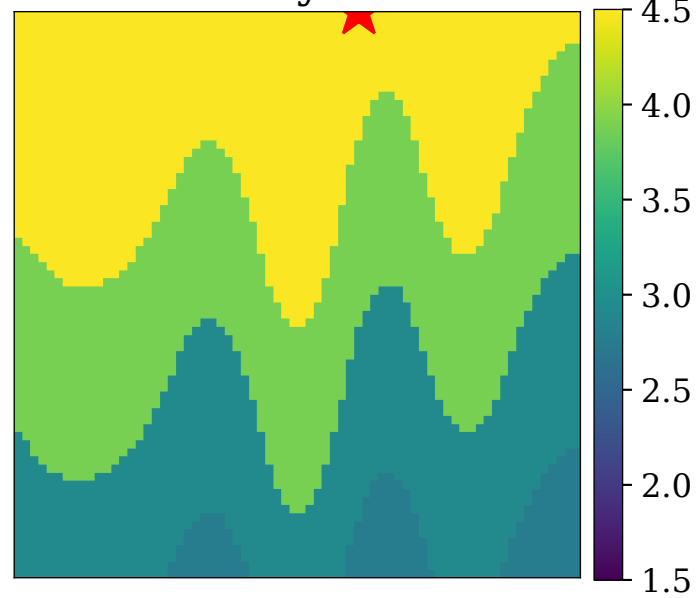

Ground Truth Time

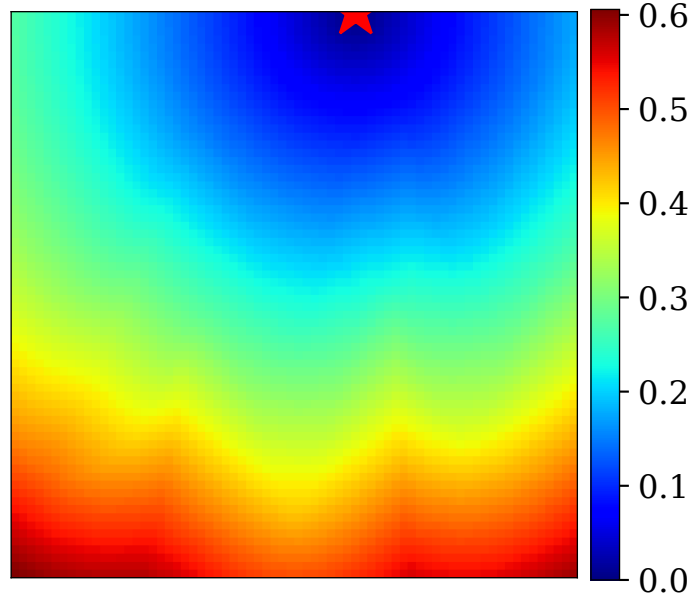

Predicted Time

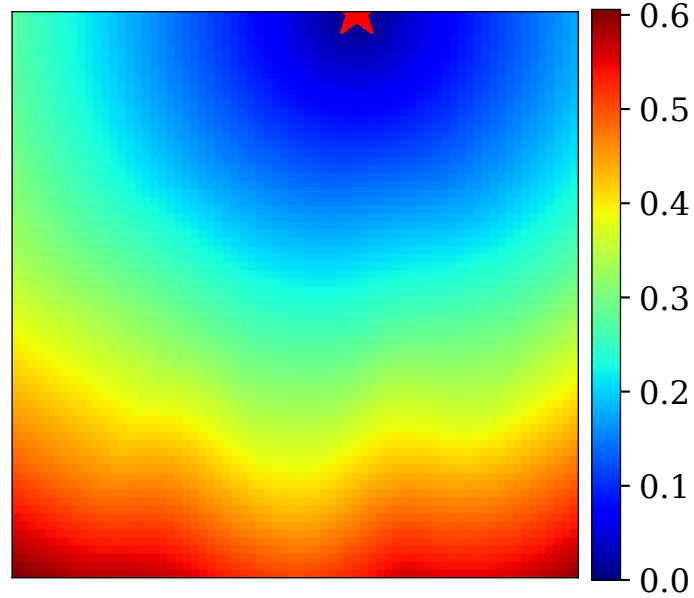

Absolute Error

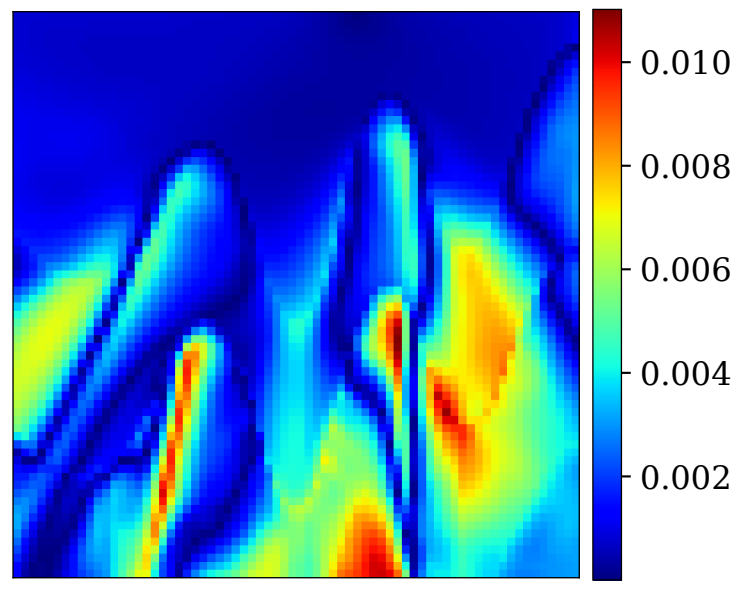

Supplement: supplementary_material [file gt_comp_top_99_(3, 0).pdf › EikonalENF_Jax-clean/experiments/fitting/figures/fwi_curvevel_b/test/gt_comp_top_99_(3, 0).pdf]

Velocity Field

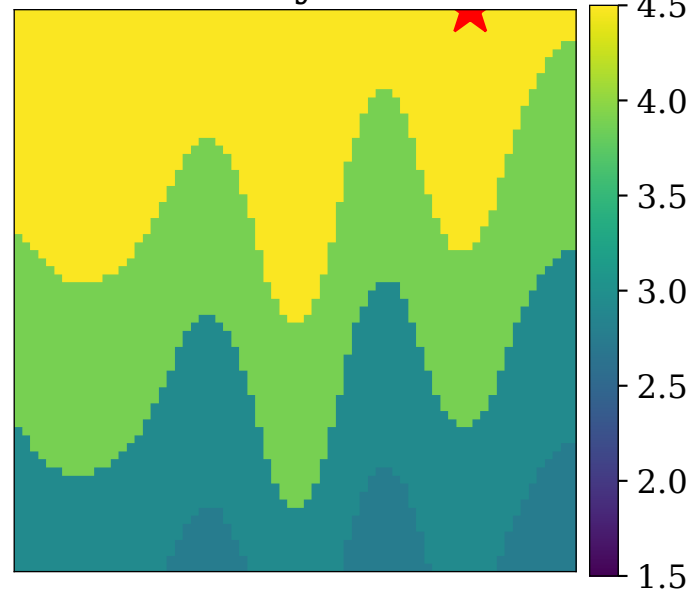

Ground Truth Time

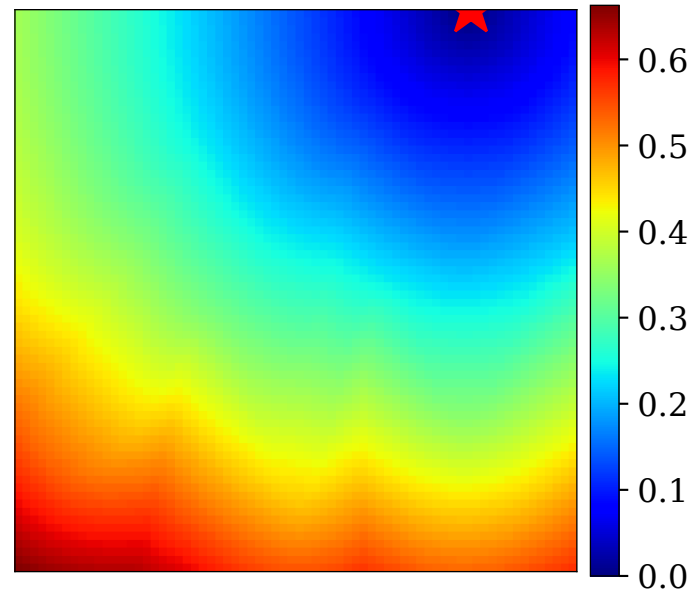

Predicted Time

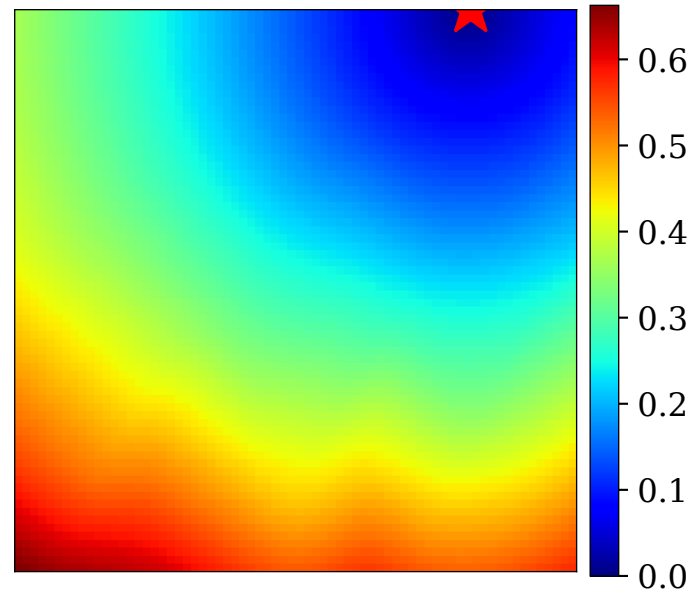

Absolute Error

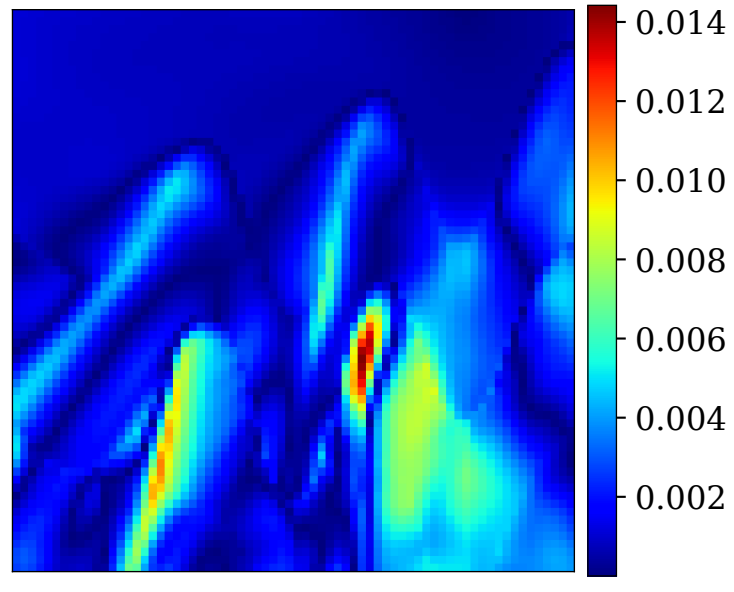

Supplement: supplementary_material [file gt_comp_top_99_(4, 0).pdf › EikonalENF_Jax-clean/experiments/fitting/figures/fwi_curvevel_b/test/gt_comp_top_99_(4, 0).pdf]

Velocity Field

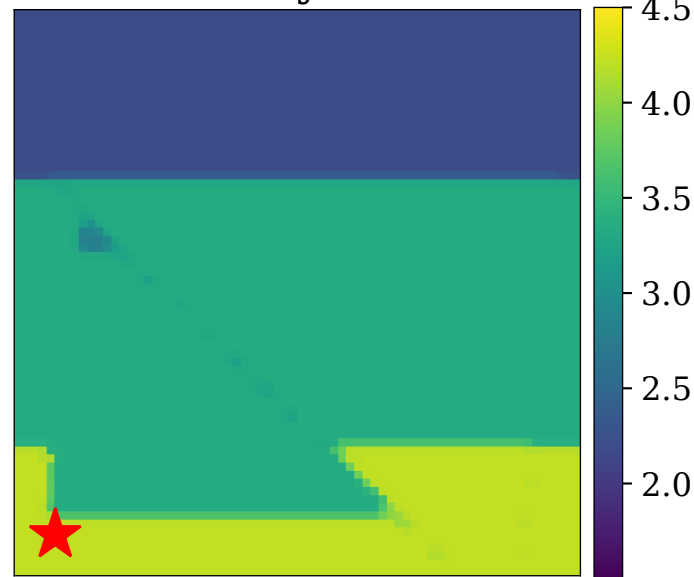

Ground Truth Time

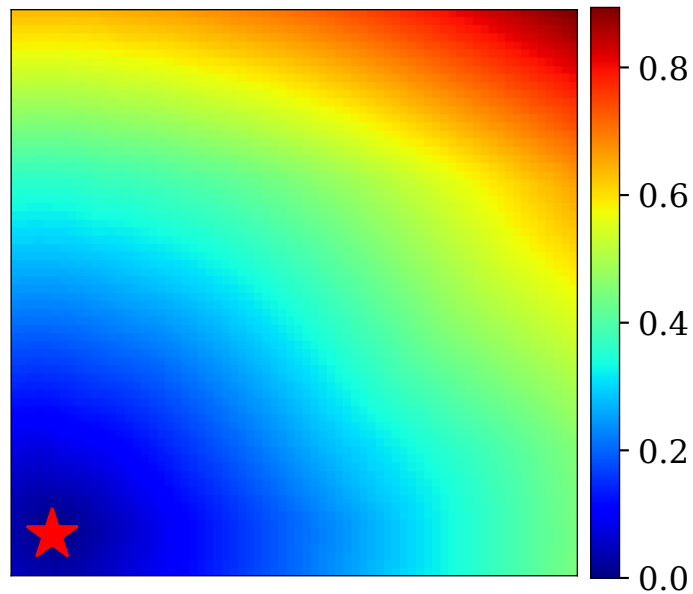

Predicted Time

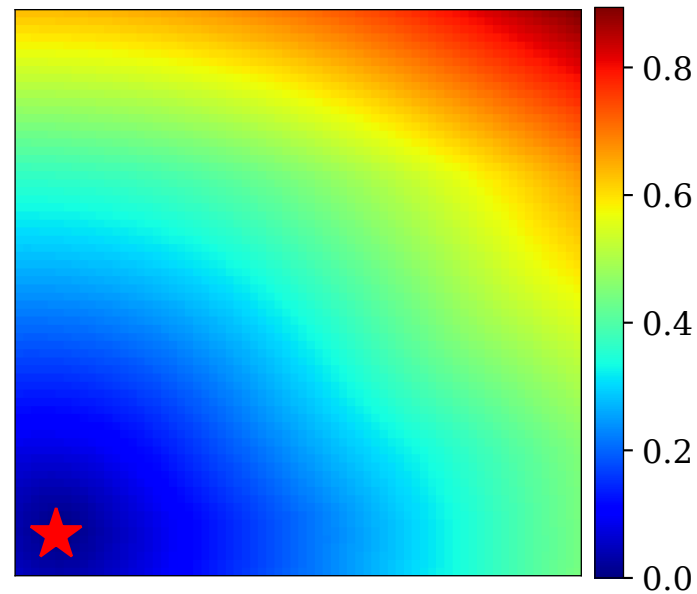

Absolute Error

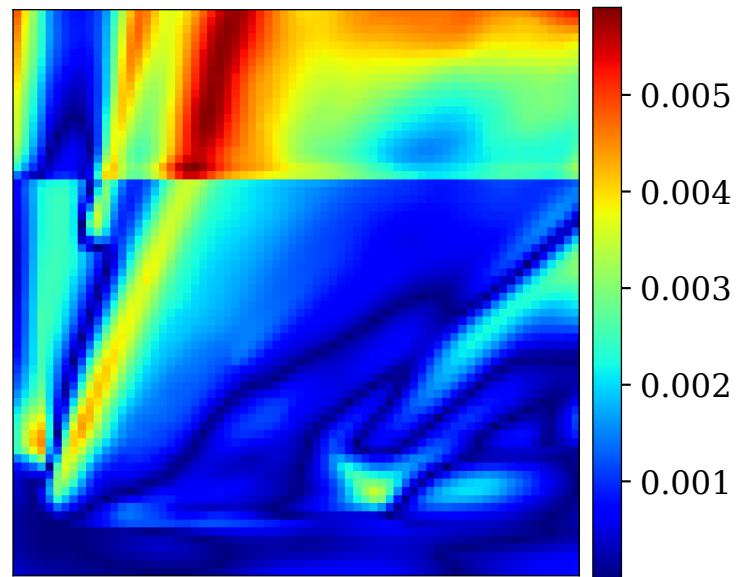

Supplement: supplementary_material [file gt_comp_full_98_(1, 1).pdf › EikonalENF_Jax-clean/experiments/fitting/figures/fwi_flatfault_a/test/gt_comp_full_98_(1, 1).pdf]

Velocity Field

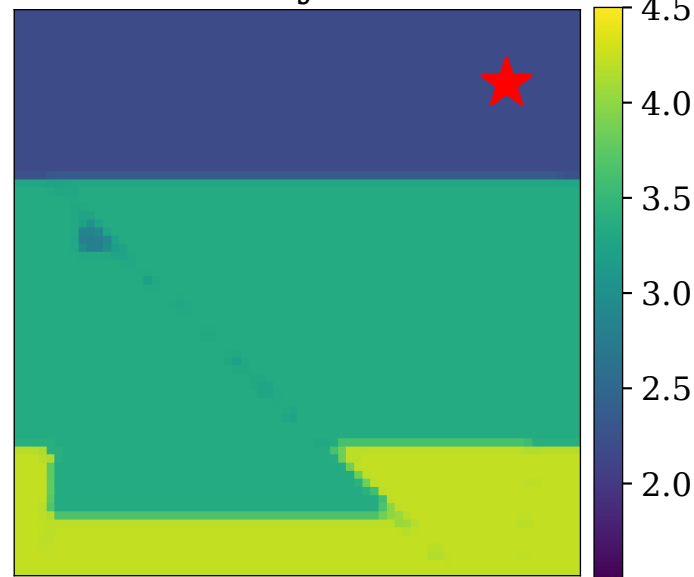

Ground Truth Time

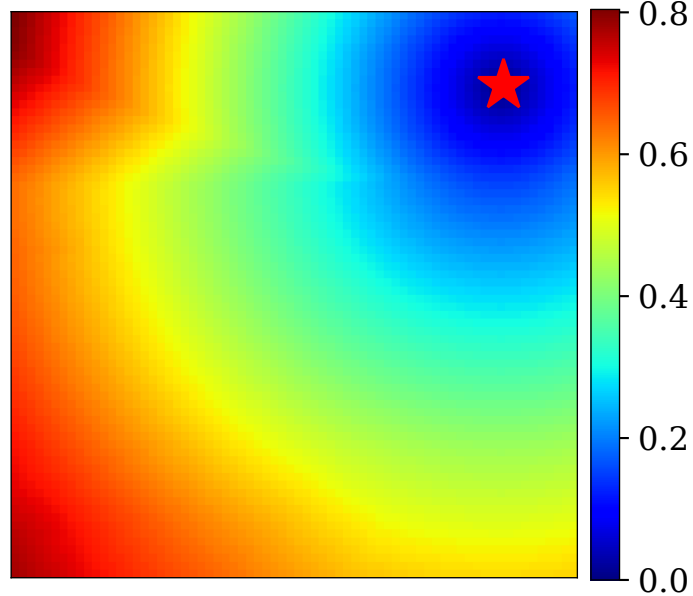

Predicted Time

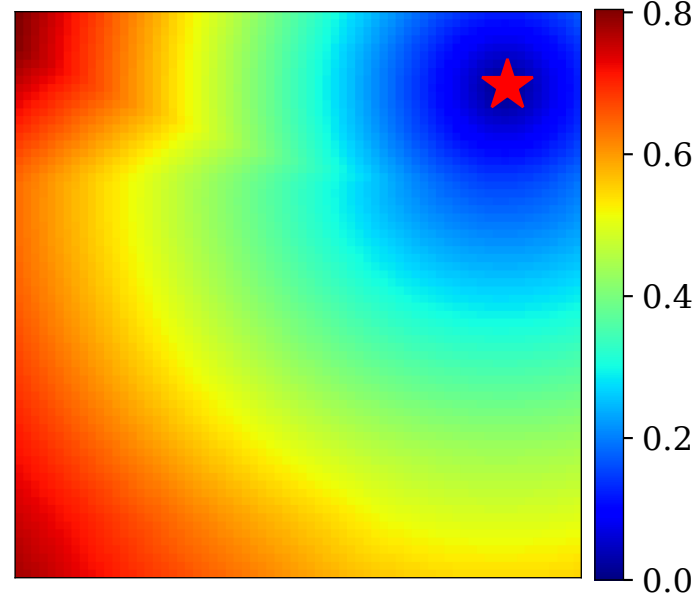

Absolute Error

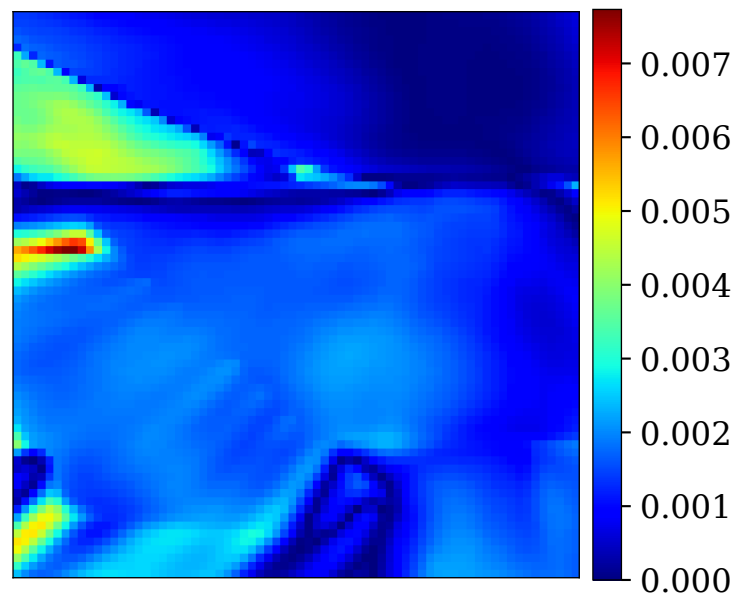

Supplement: supplementary_material [file gt_comp_full_98_(12, 12).pdf › EikonalENF_Jax-clean/experiments/fitting/figures/fwi_flatfault_a/test/gt_comp_full_98_(12, 12).pdf]

Velocity Field

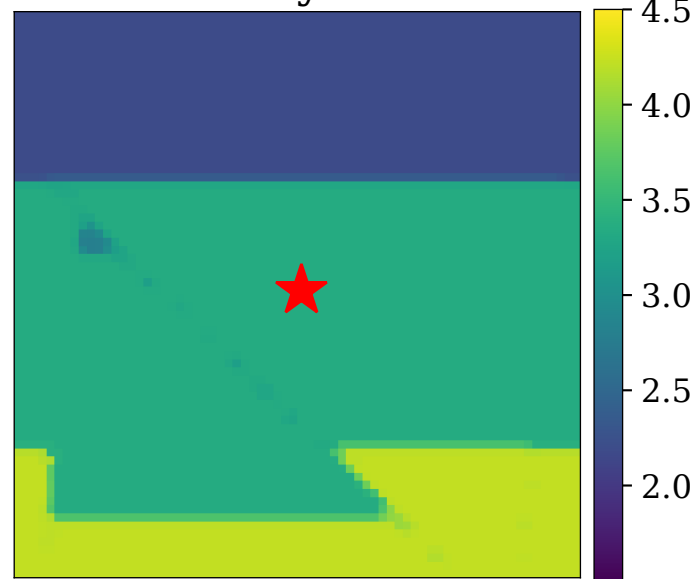

Ground Truth Time

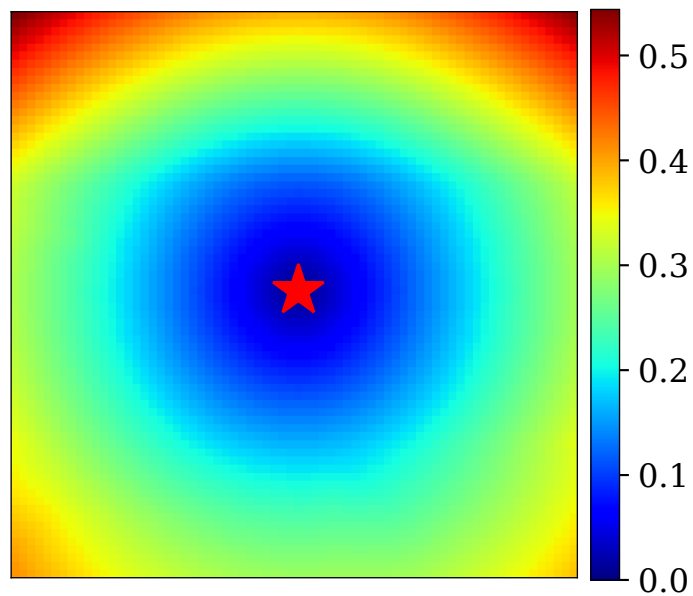

Predicted Time

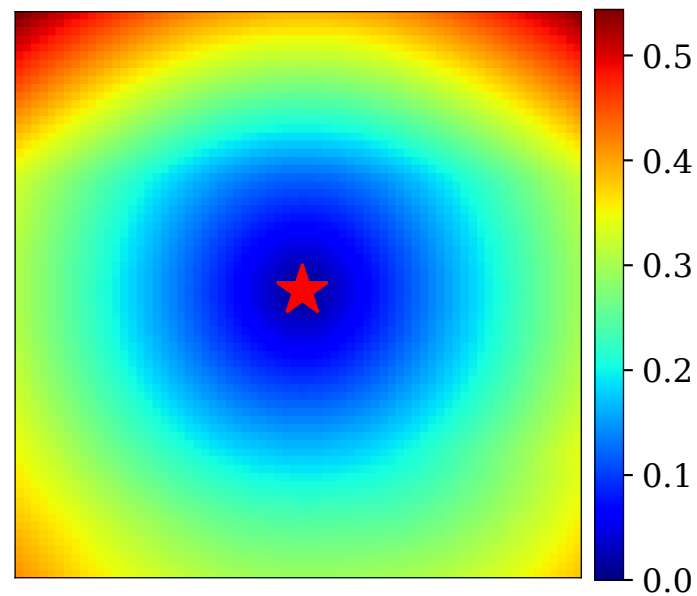

Absolute Error

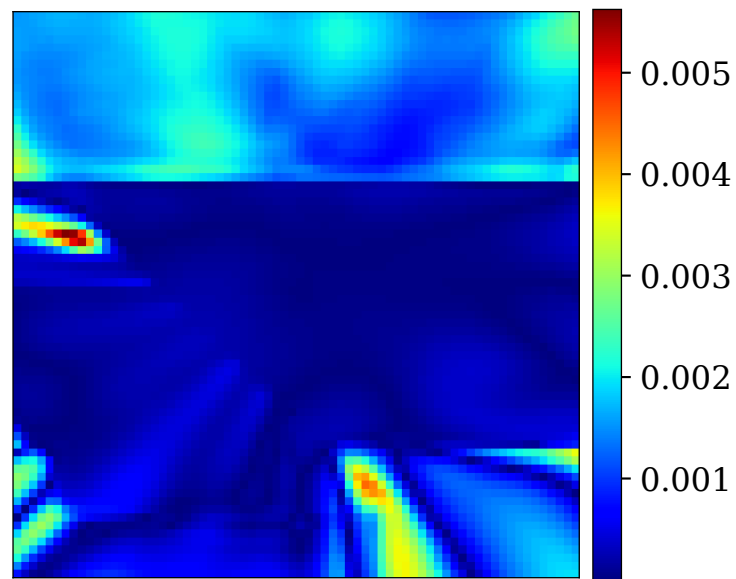

Supplement: supplementary_material [file gt_comp_full_98_(7, 7).pdf › EikonalENF_Jax-clean/experiments/fitting/figures/fwi_flatfault_a/test/gt_comp_full_98_(7, 7).pdf]

Velocity Field

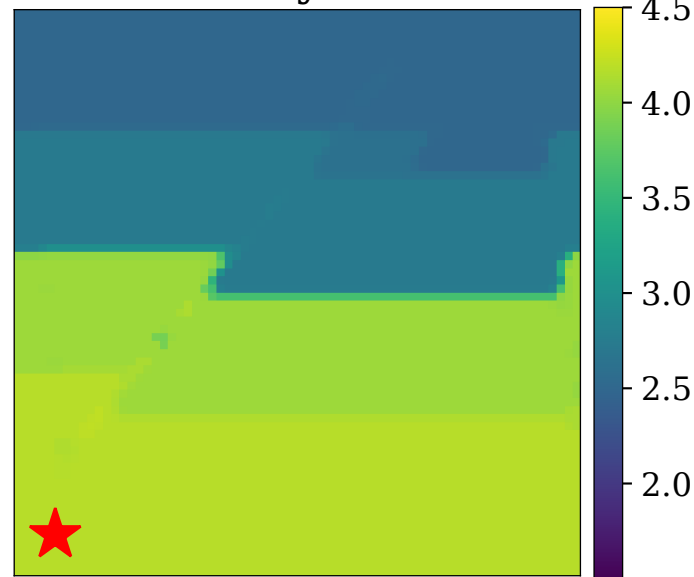

Ground Truth Time

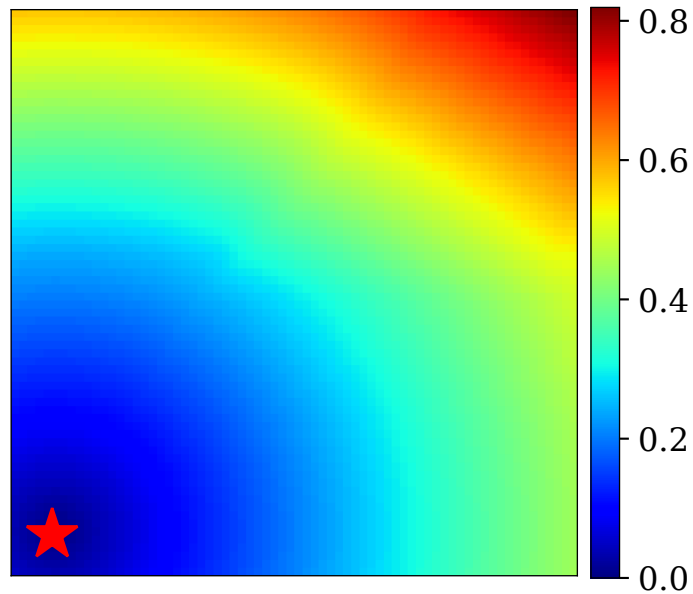

Predicted Time

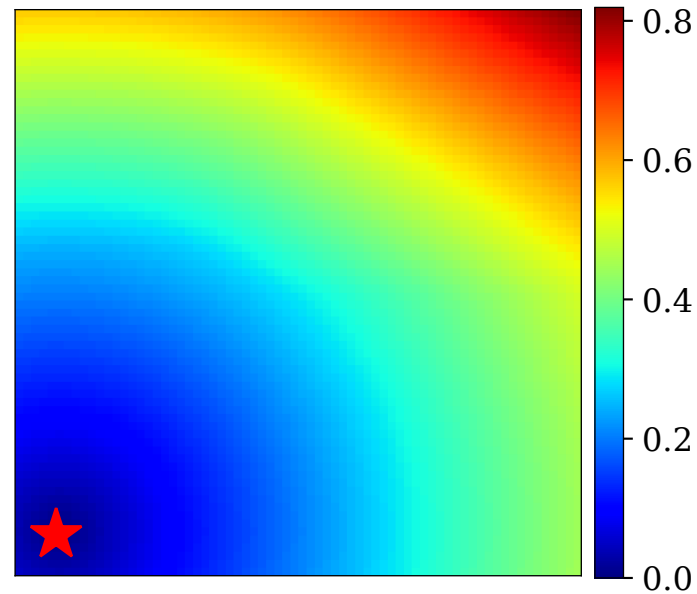

Absolute Error

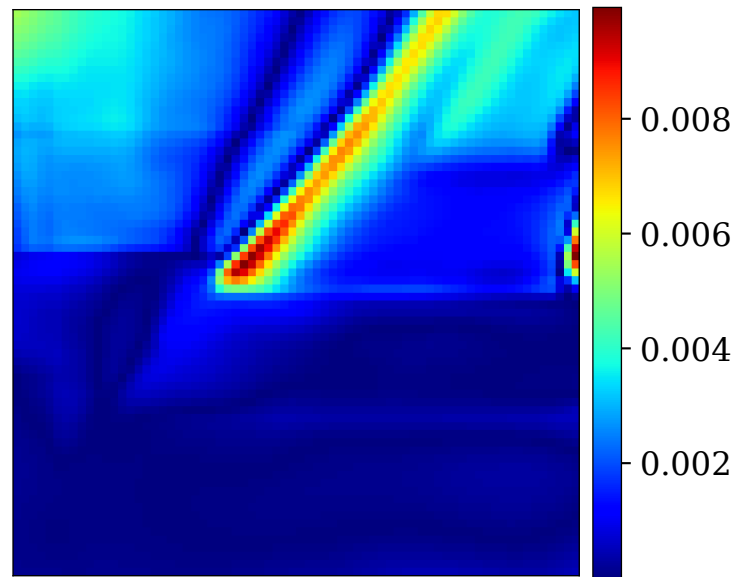

Supplement: supplementary_material [file gt_comp_full_99_(1, 1).pdf › EikonalENF_Jax-clean/experiments/fitting/figures/fwi_flatfault_a/test/gt_comp_full_99_(1, 1).pdf]

Velocity Field

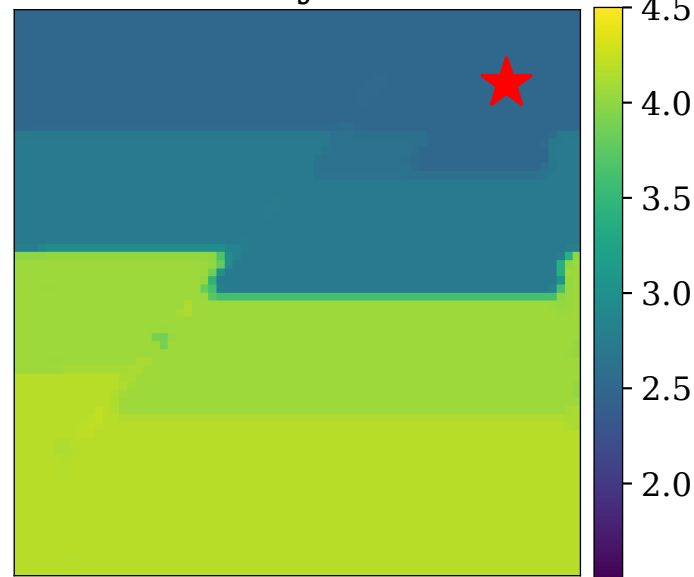

Ground Truth Time

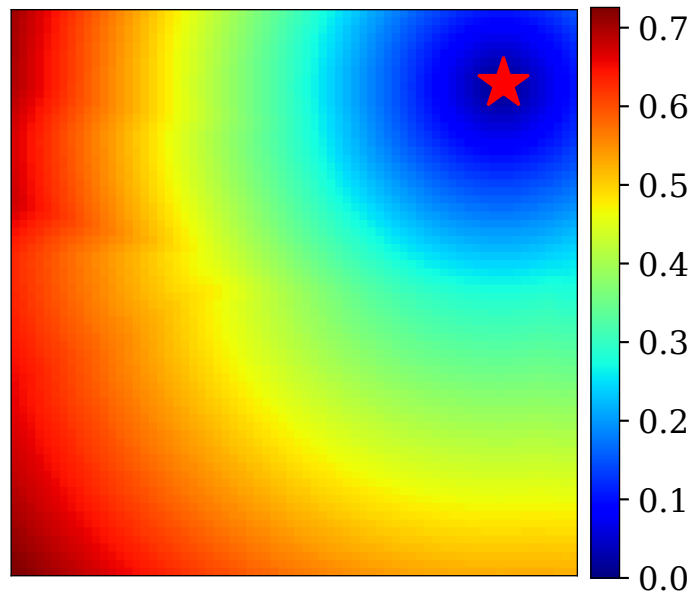

Predicted Time

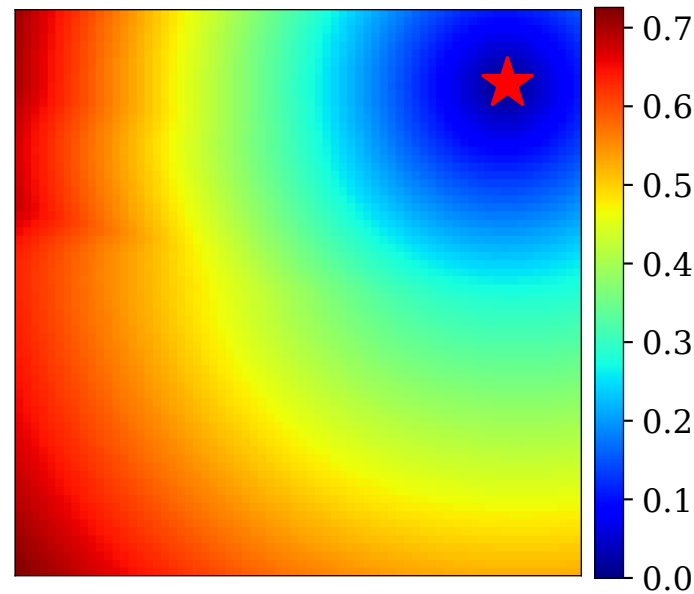

Absolute Error

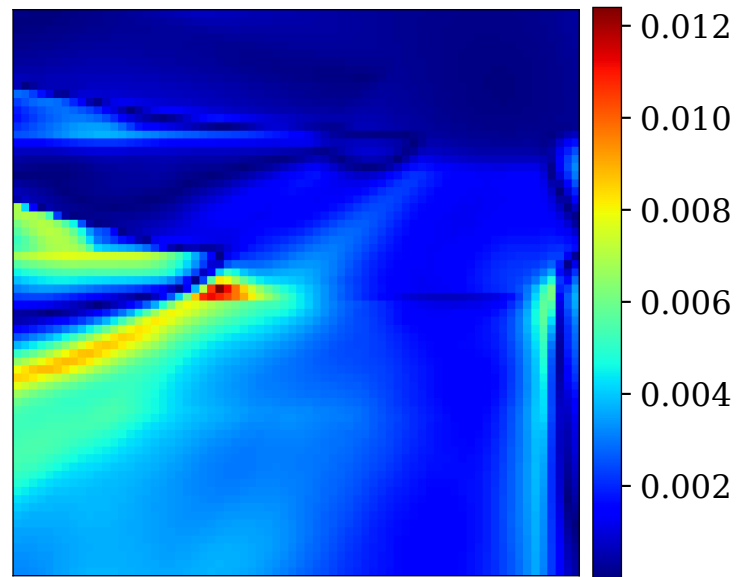

Supplement: supplementary_material [file gt_comp_full_99_(12, 12).pdf › EikonalENF_Jax-clean/experiments/fitting/figures/fwi_flatfault_a/test/gt_comp_full_99_(12, 12).pdf]

Velocity Field

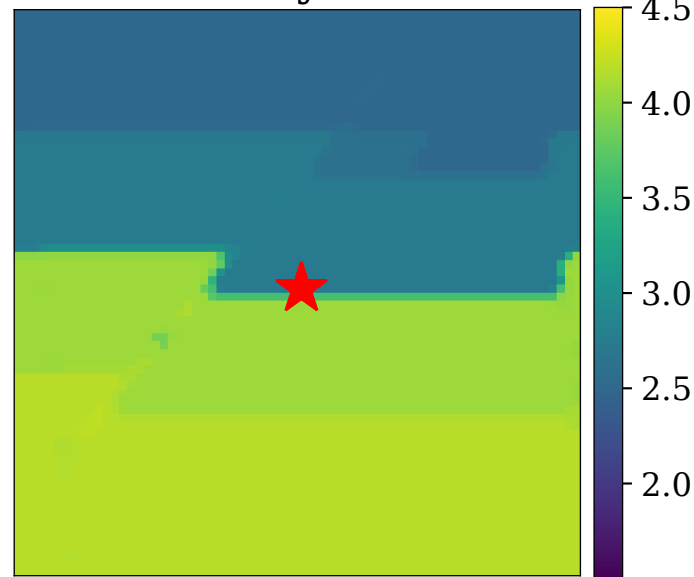

Ground Truth Time

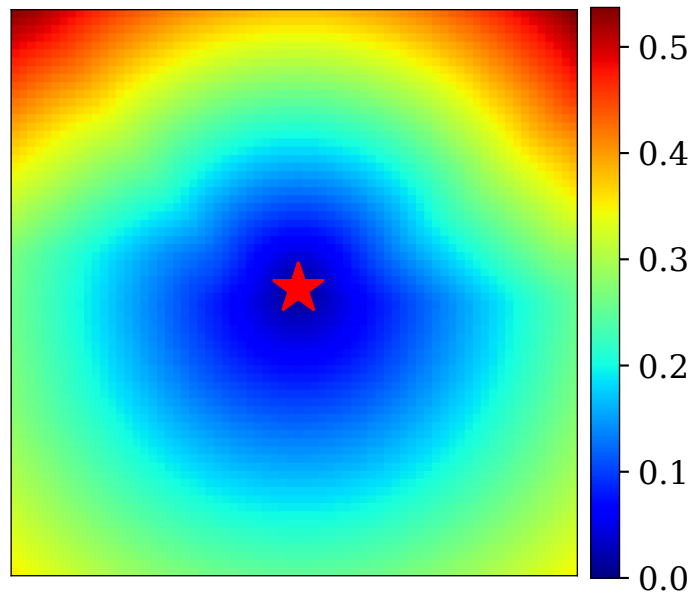

Predicted Time

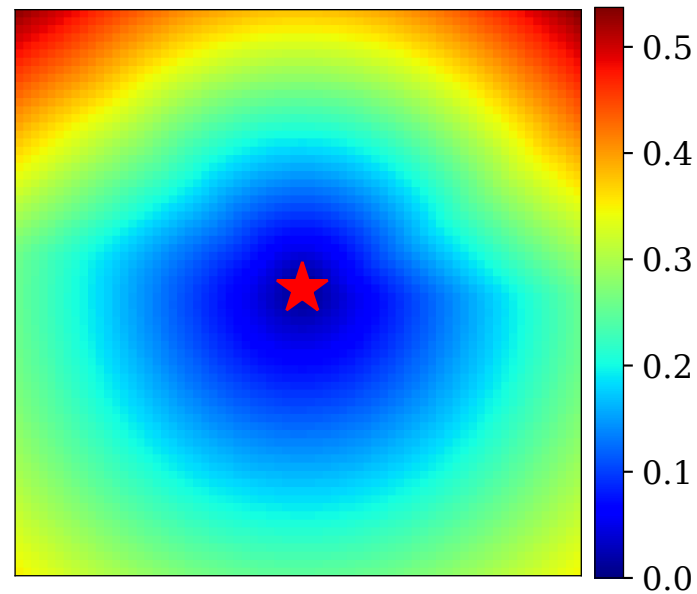

Absolute Error

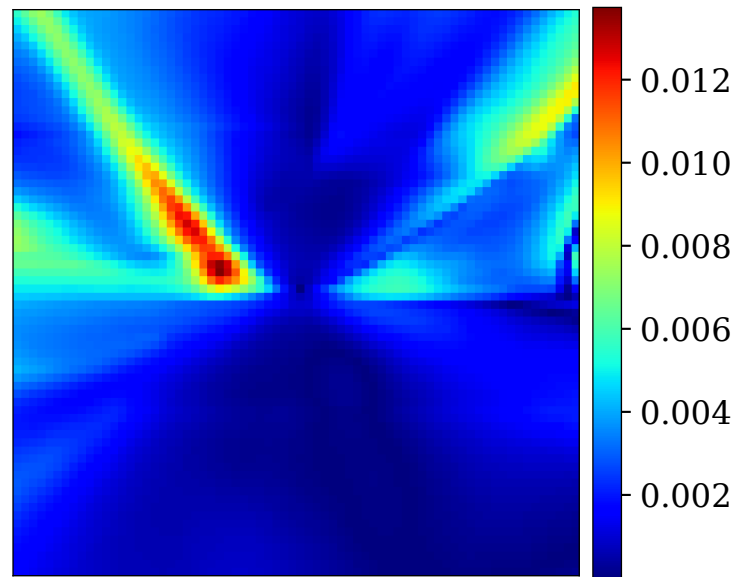

Supplement: supplementary_material [file gt_comp_full_99_(7, 7).pdf › EikonalENF_Jax-clean/experiments/fitting/figures/fwi_flatfault_a/test/gt_comp_full_99_(7, 7).pdf]

Velocity Field

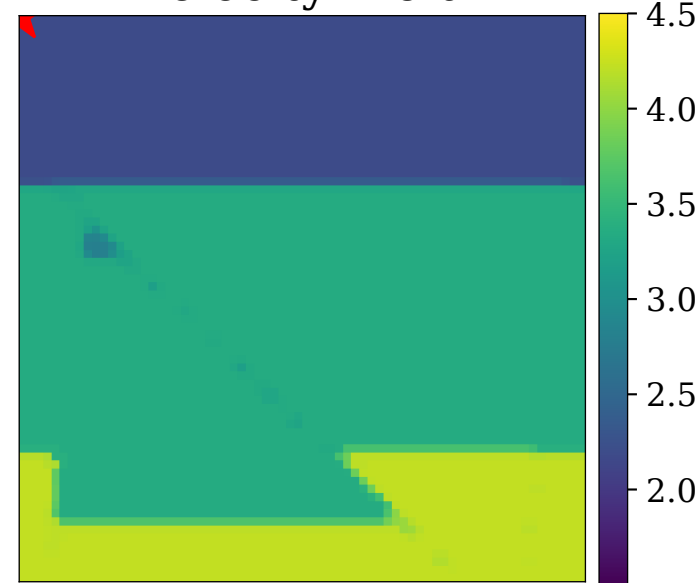

Ground Truth Time

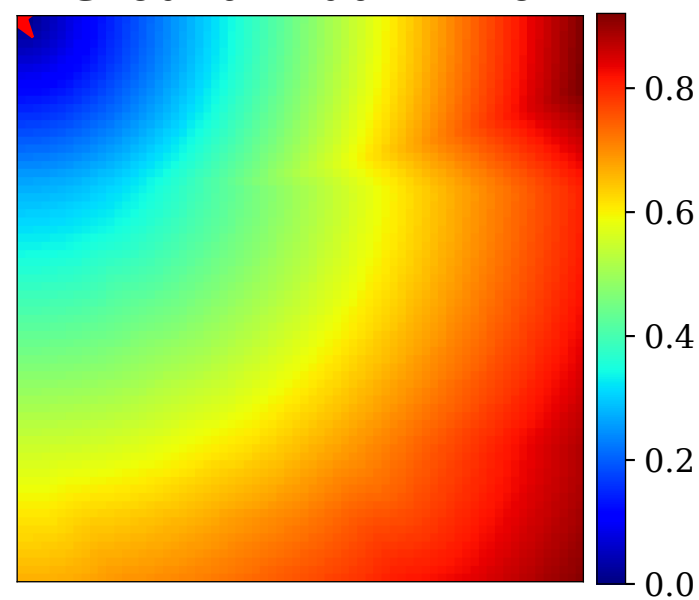

Predicted Time

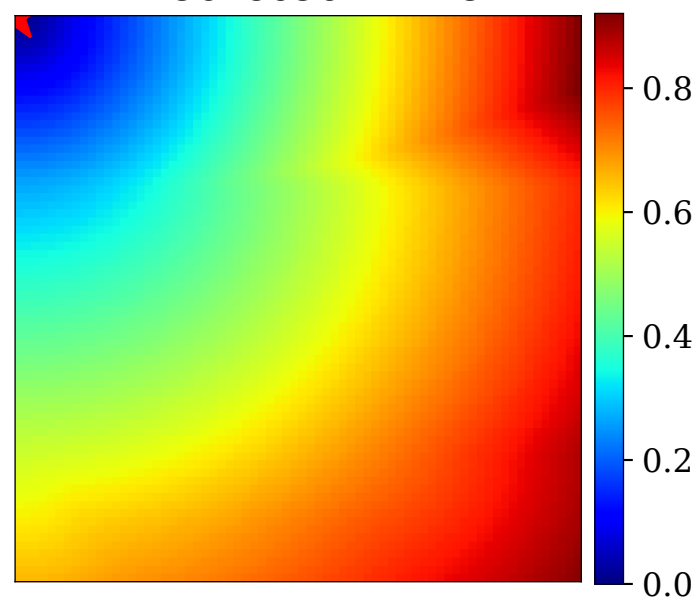

Absolute Error

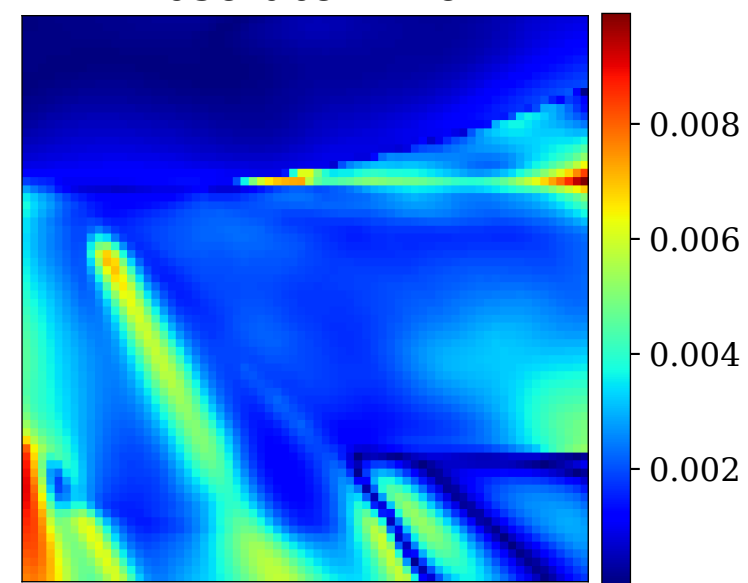

Supplement: supplementary_material [file gt_comp_top_98_(0, 0).pdf › EikonalENF_Jax-clean/experiments/fitting/figures/fwi_flatfault_a/test/gt_comp_top_98_(0, 0).pdf]

Velocity Field

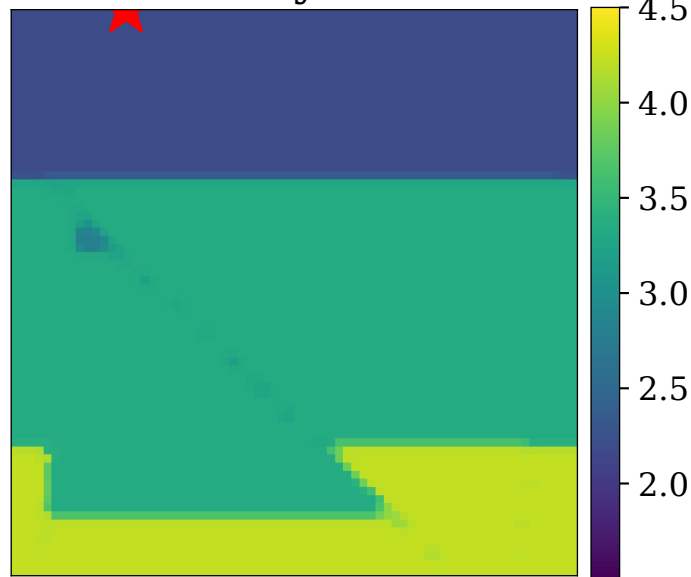

Ground Truth Time

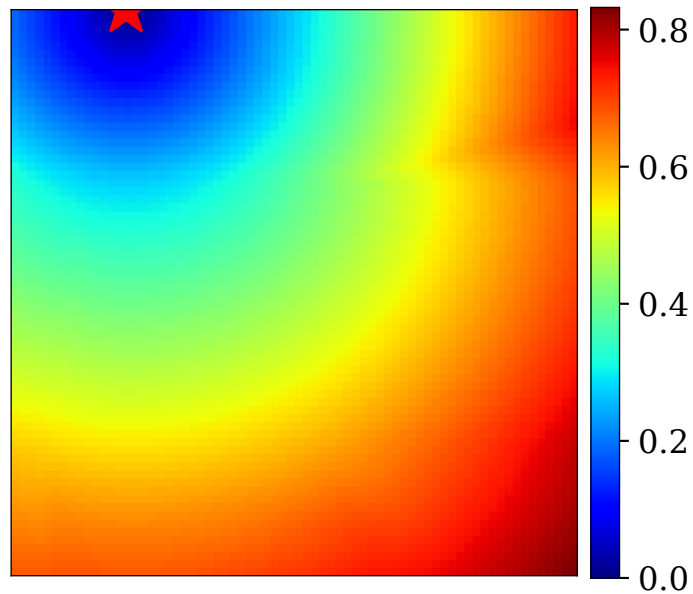

Predicted Time

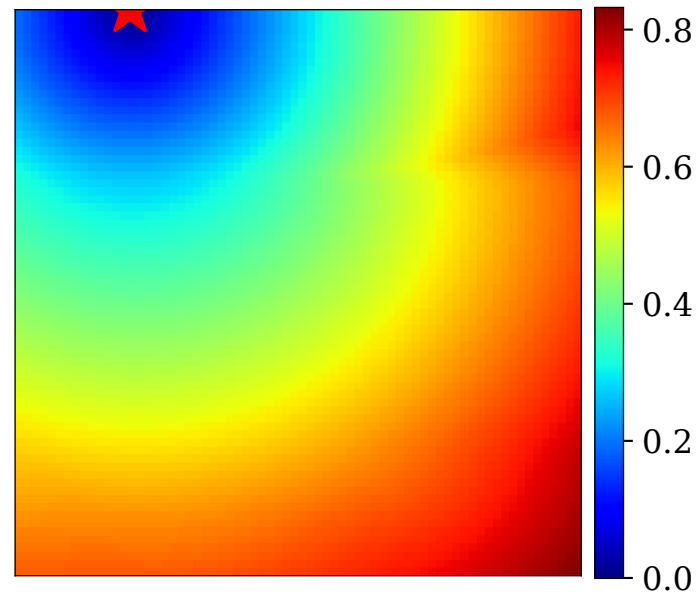

Absolute Error

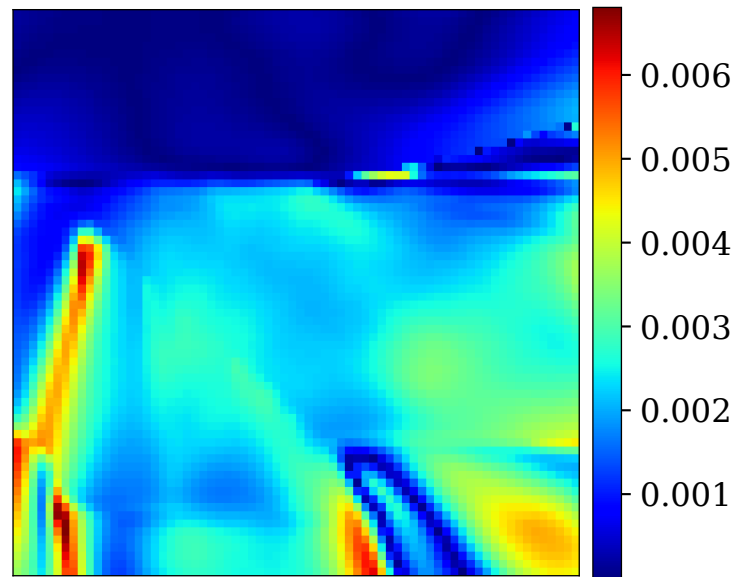

Supplement: supplementary_material [file gt_comp_top_98_(1, 0).pdf › EikonalENF_Jax-clean/experiments/fitting/figures/fwi_flatfault_a/test/gt_comp_top_98_(1, 0).pdf]

Velocity Field

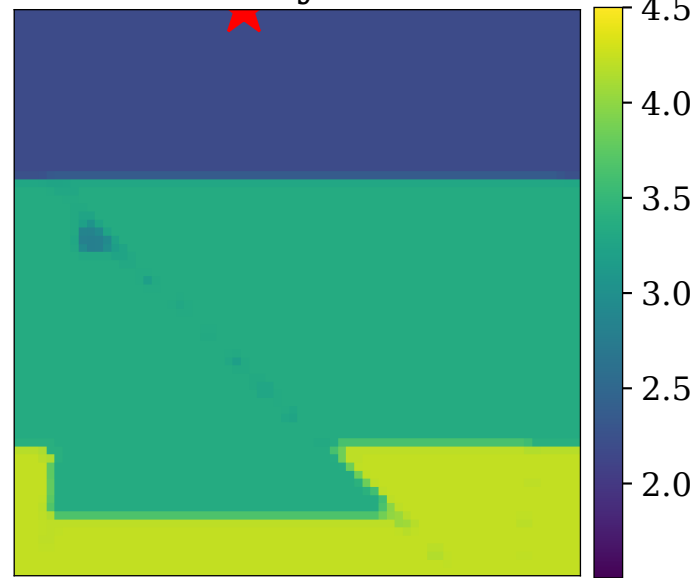

Ground Truth Time

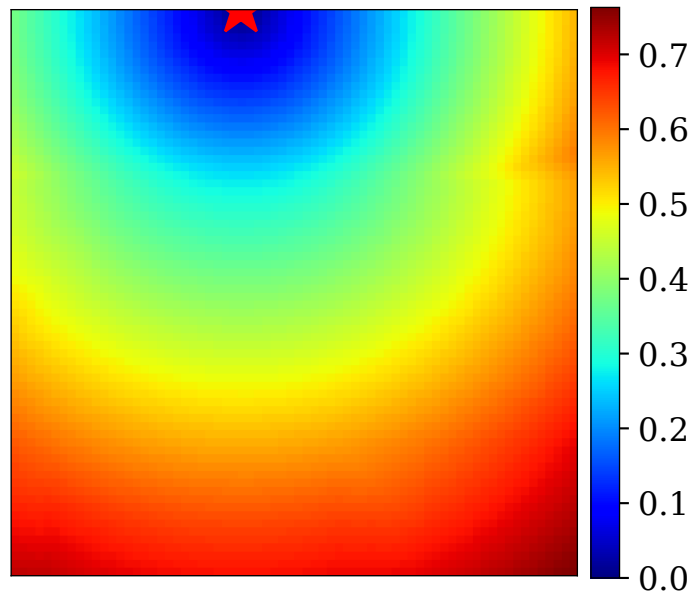

Predicted Time

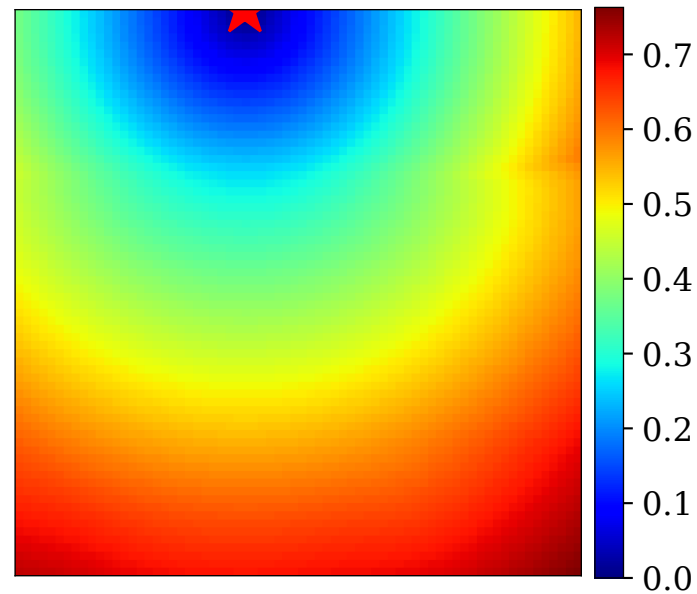

Absolute Error

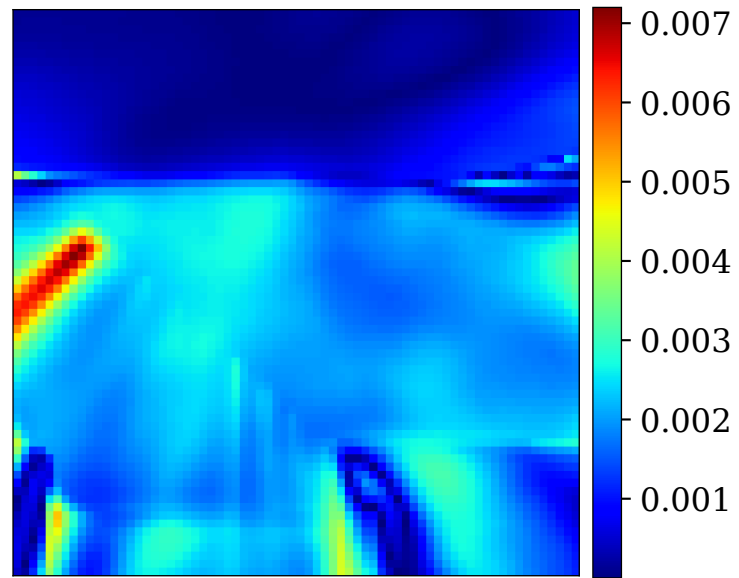

Supplement: supplementary_material [file gt_comp_top_98_(2, 0).pdf › EikonalENF_Jax-clean/experiments/fitting/figures/fwi_flatfault_a/test/gt_comp_top_98_(2, 0).pdf]

Velocity Field

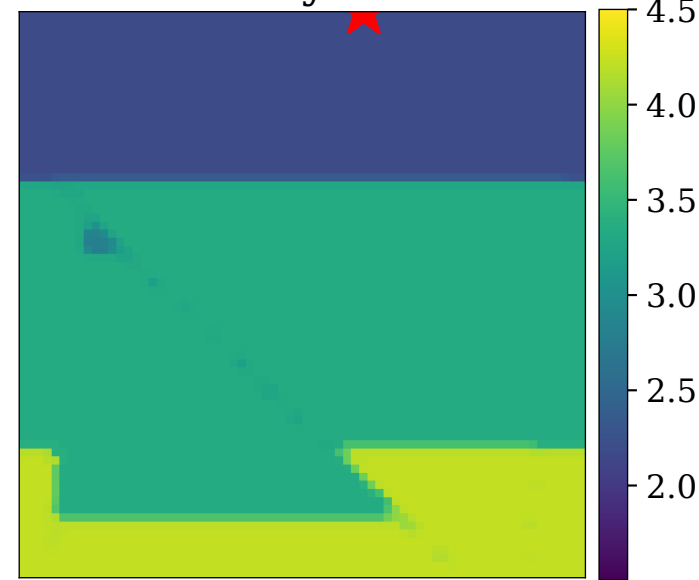

Ground Truth Time

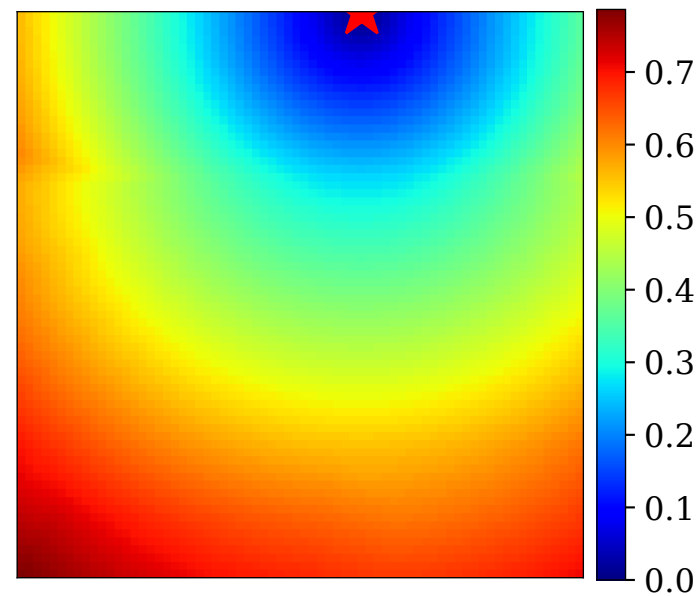

Predicted Time

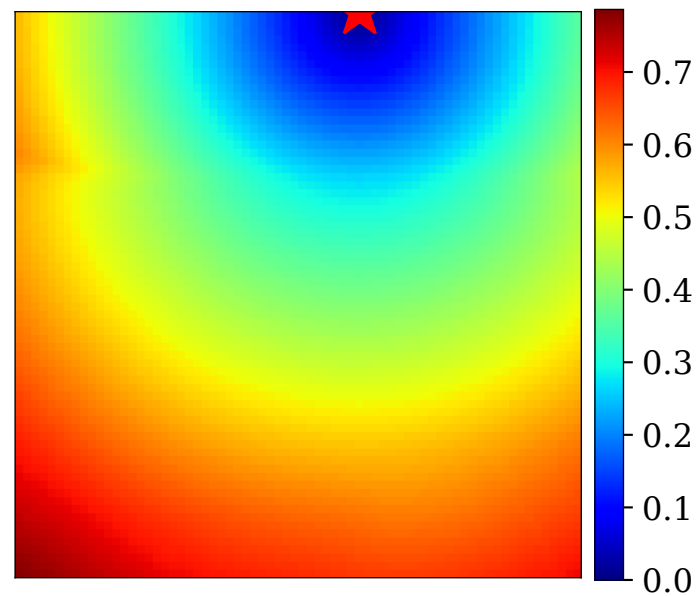

Absolute Error

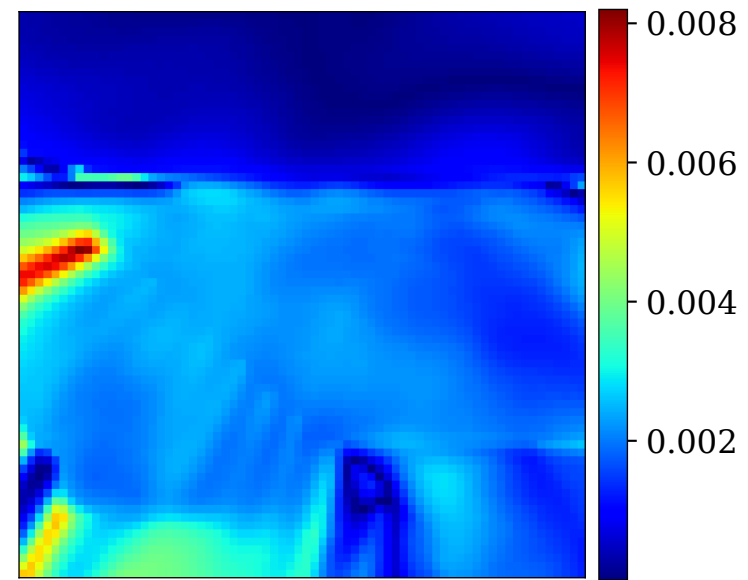

Supplement: supplementary_material [file gt_comp_top_98_(3, 0).pdf › EikonalENF_Jax-clean/experiments/fitting/figures/fwi_flatfault_a/test/gt_comp_top_98_(3, 0).pdf]

Velocity Field

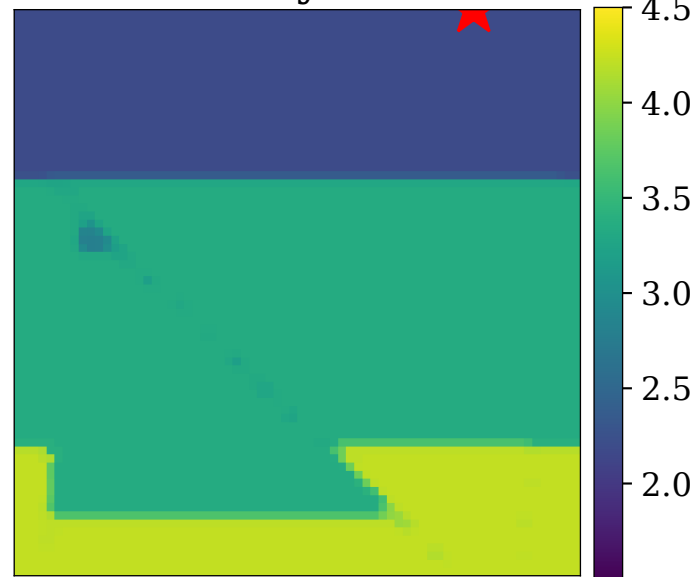

Ground Truth Time

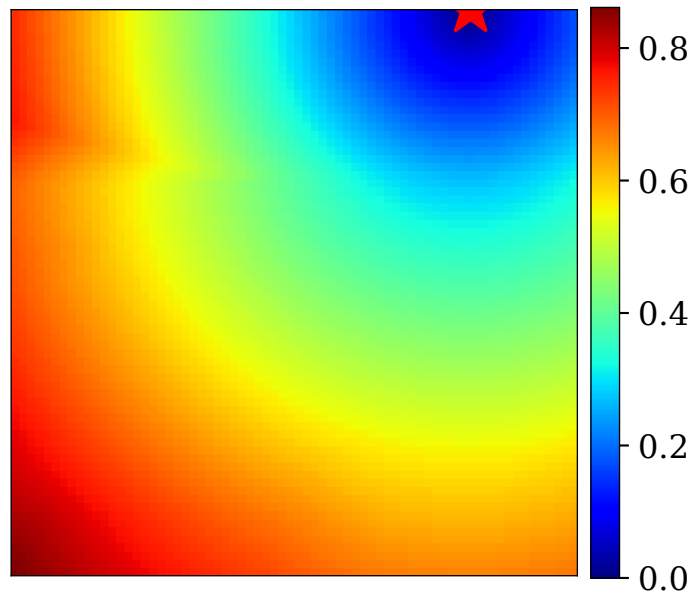

Predicted Time

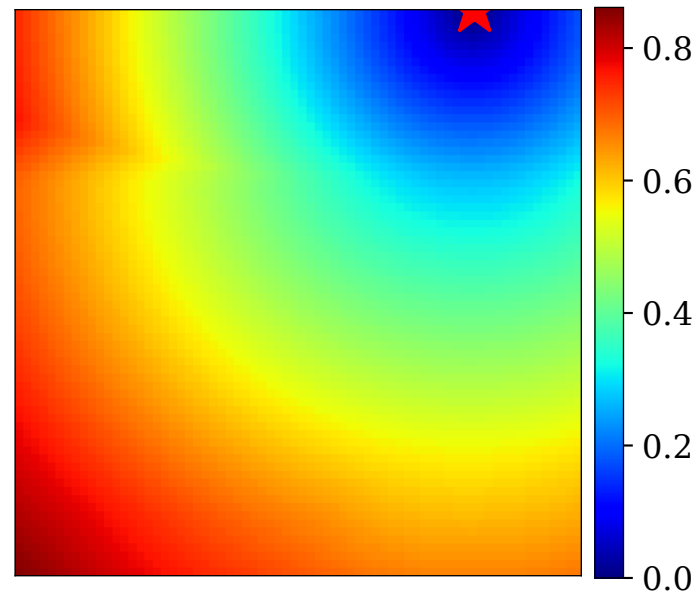

Absolute Error

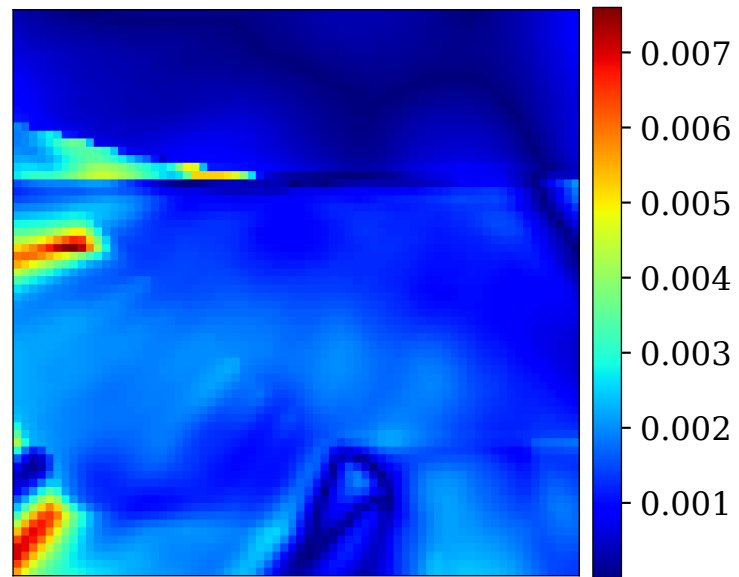

Supplement: supplementary_material [file gt_comp_top_98_(4, 0).pdf › EikonalENF_Jax-clean/experiments/fitting/figures/fwi_flatfault_a/test/gt_comp_top_98_(4, 0).pdf]

Velocity Field

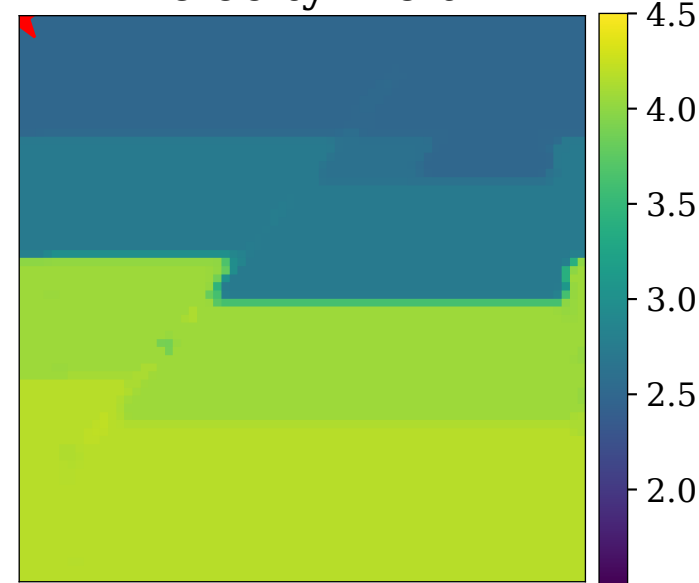

Ground Truth Time

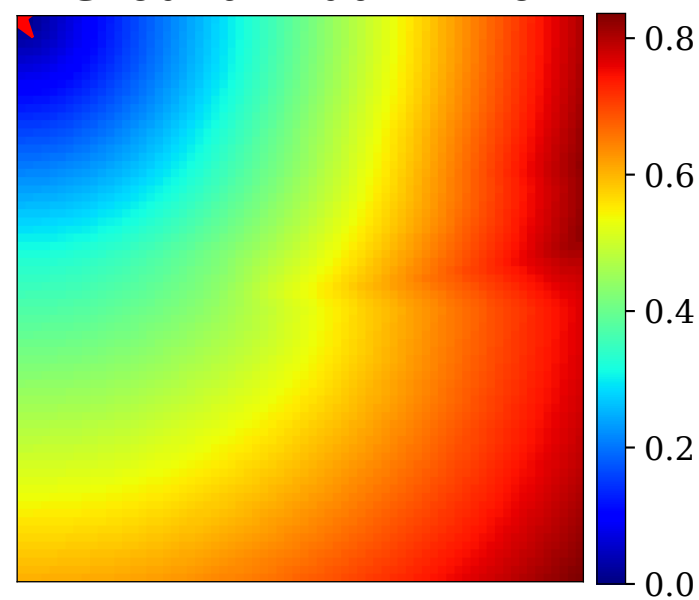

Predicted Time

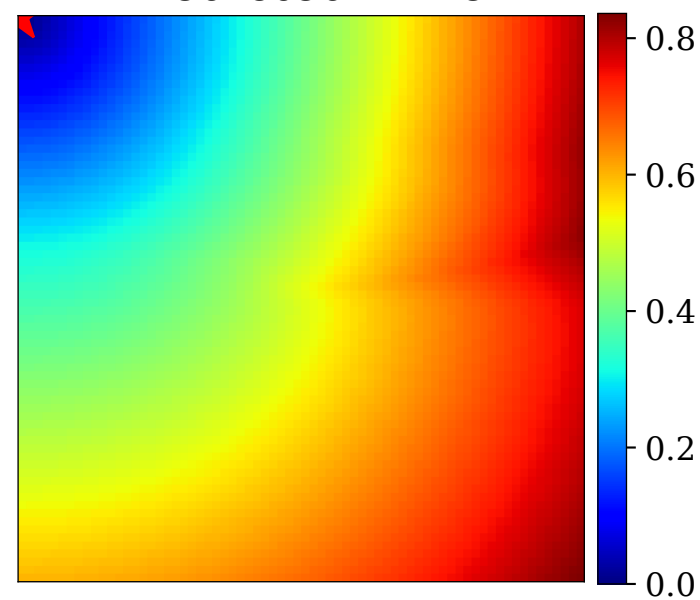

Absolute Error

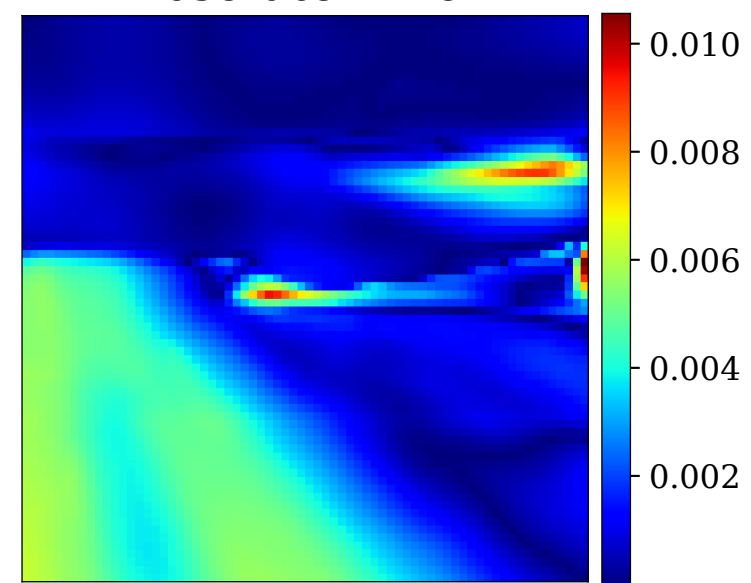

Supplement: supplementary_material [file gt_comp_top_99_(0, 0).pdf › EikonalENF_Jax-clean/experiments/fitting/figures/fwi_flatfault_a/test/gt_comp_top_99_(0, 0).pdf]

Velocity Field

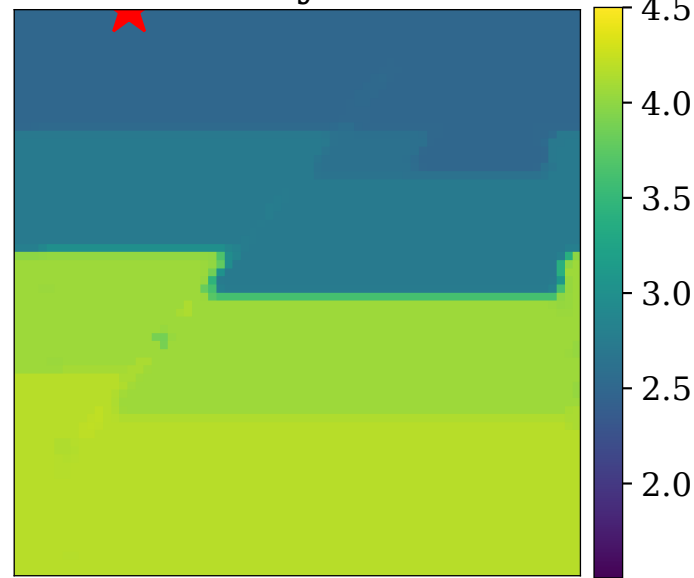

Ground Truth Time

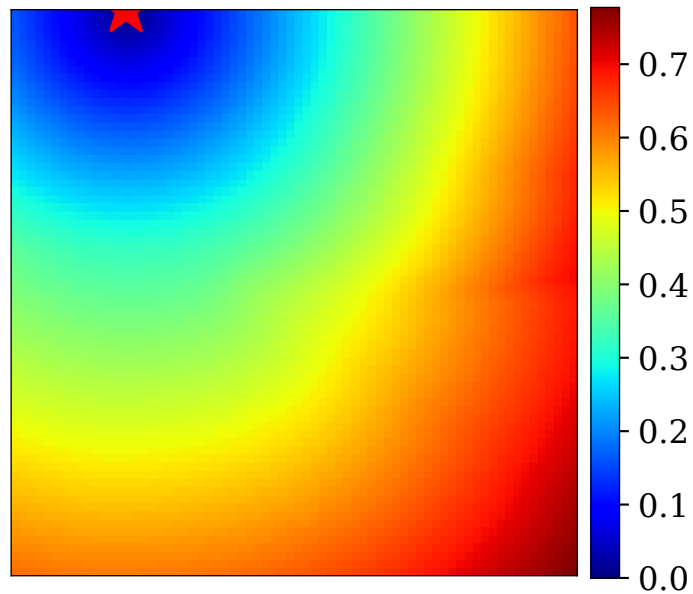

Predicted Time

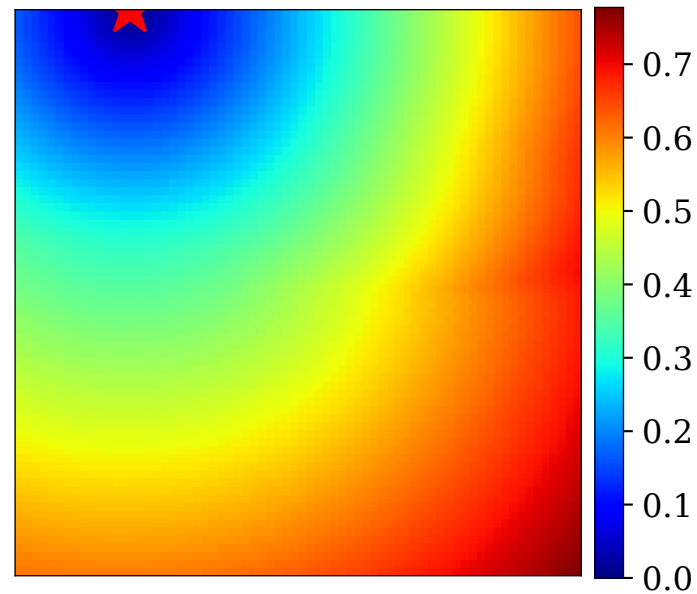

Absolute Error

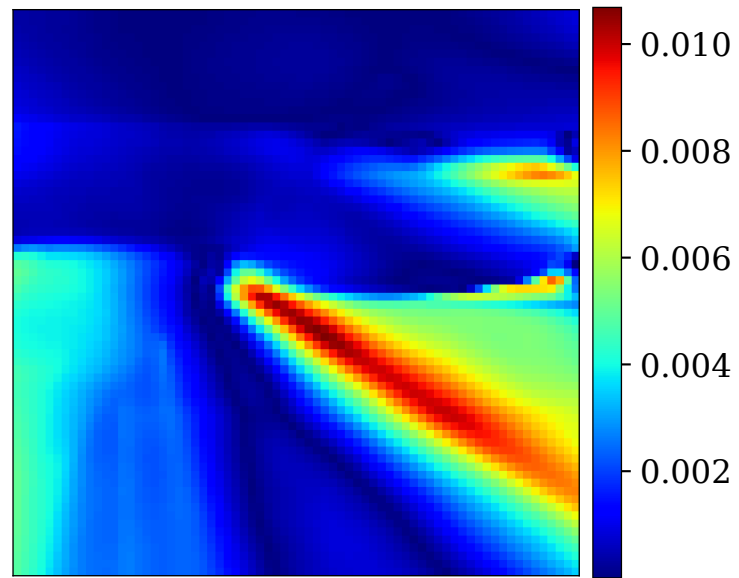

Supplement: supplementary_material [file gt_comp_top_99_(1, 0).pdf › EikonalENF_Jax-clean/experiments/fitting/figures/fwi_flatfault_a/test/gt_comp_top_99_(1, 0).pdf]

Velocity Field

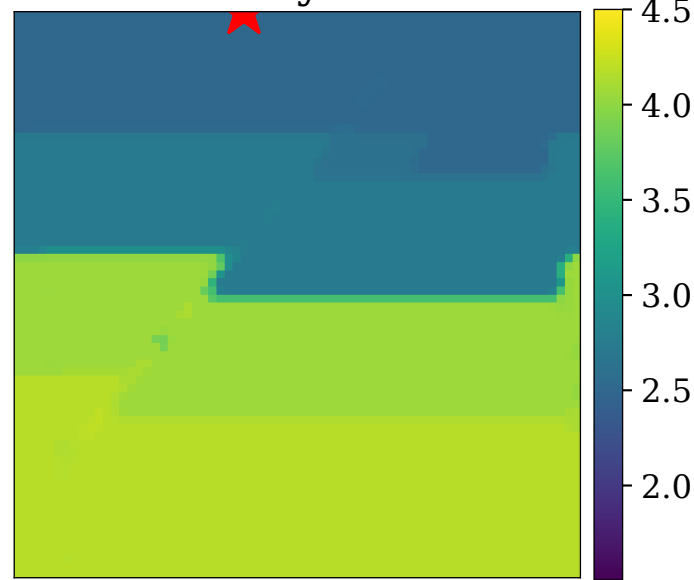

Ground Truth Time

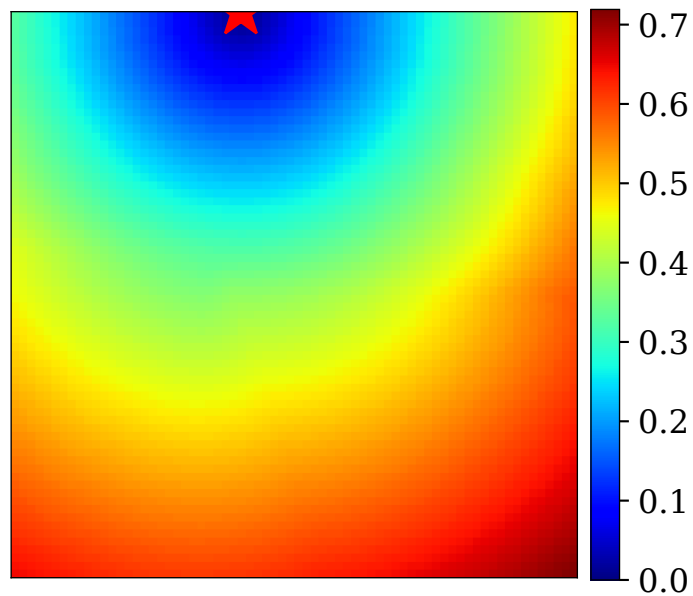

Predicted Time

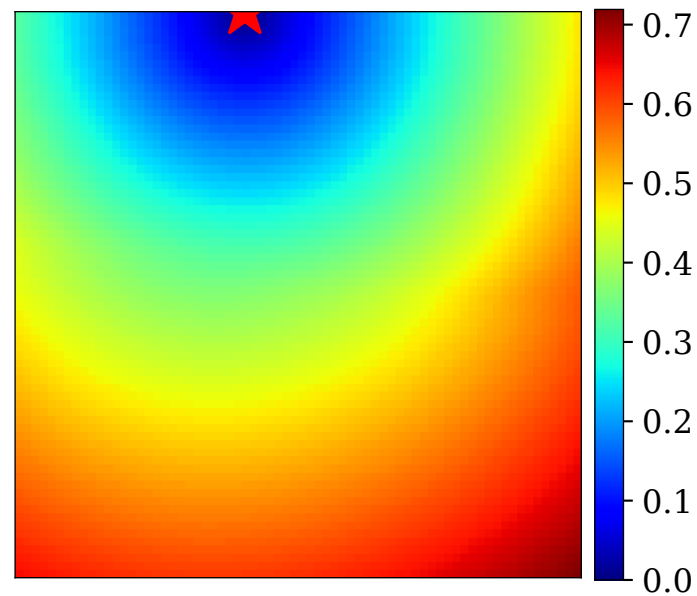

Absolute Error

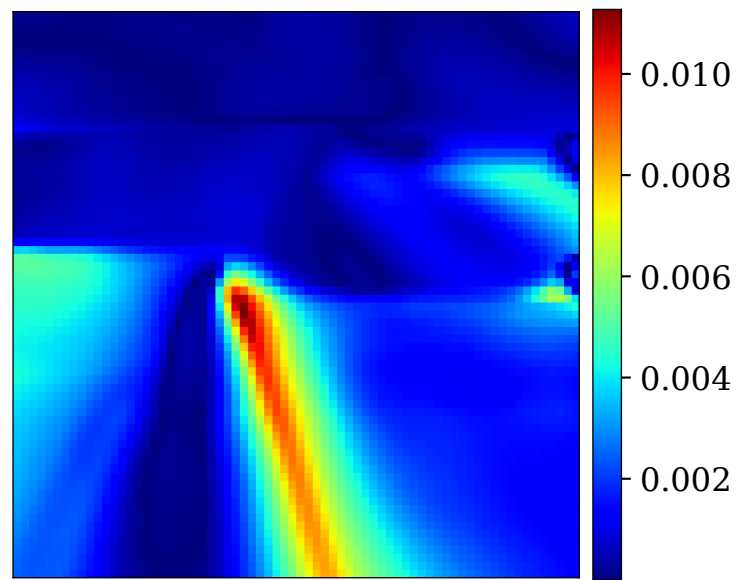

Supplement: supplementary_material [file gt_comp_top_99_(2, 0).pdf › EikonalENF_Jax-clean/experiments/fitting/figures/fwi_flatfault_a/test/gt_comp_top_99_(2, 0).pdf]

Velocity Field

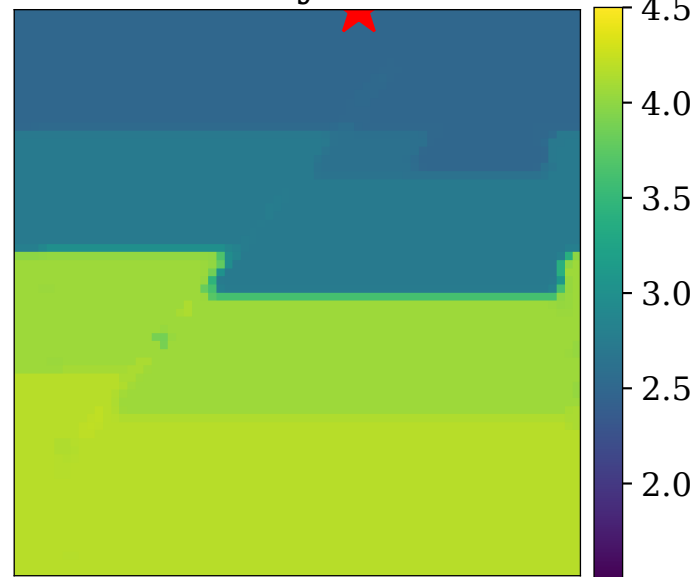

Ground Truth Time

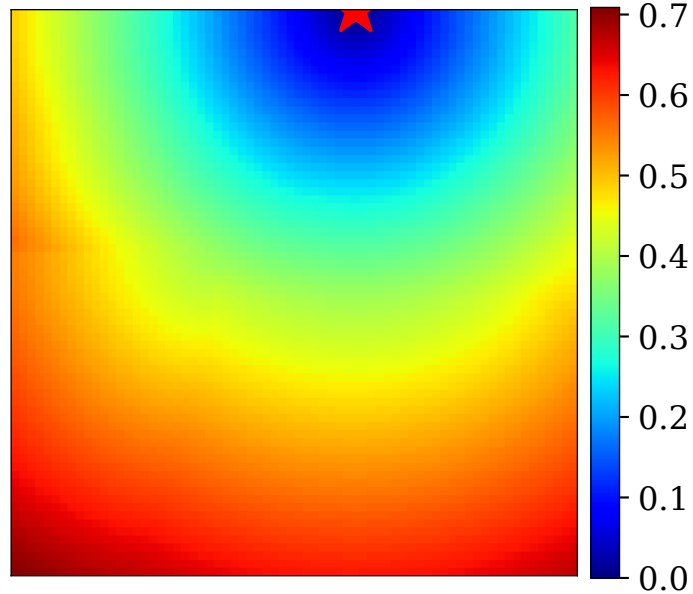

Predicted Time

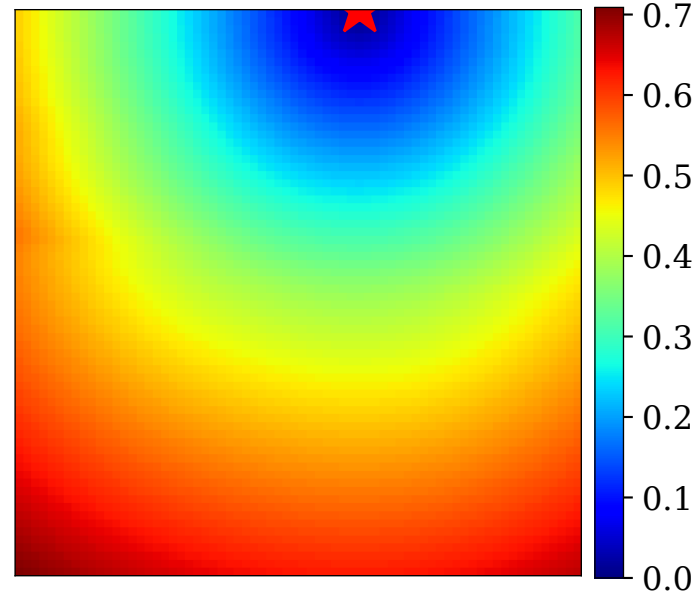

Absolute Error

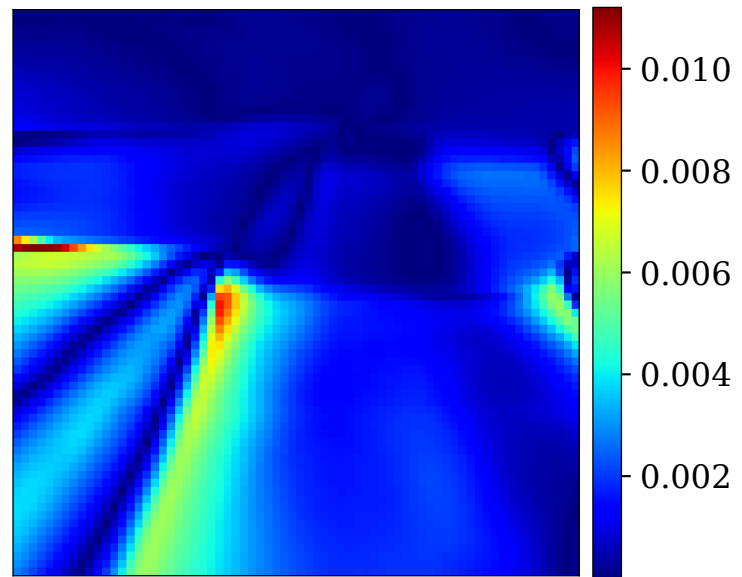

Supplement: supplementary_material [file gt_comp_top_99_(3, 0).pdf › EikonalENF_Jax-clean/experiments/fitting/figures/fwi_flatfault_a/test/gt_comp_top_99_(3, 0).pdf]

Velocity Field

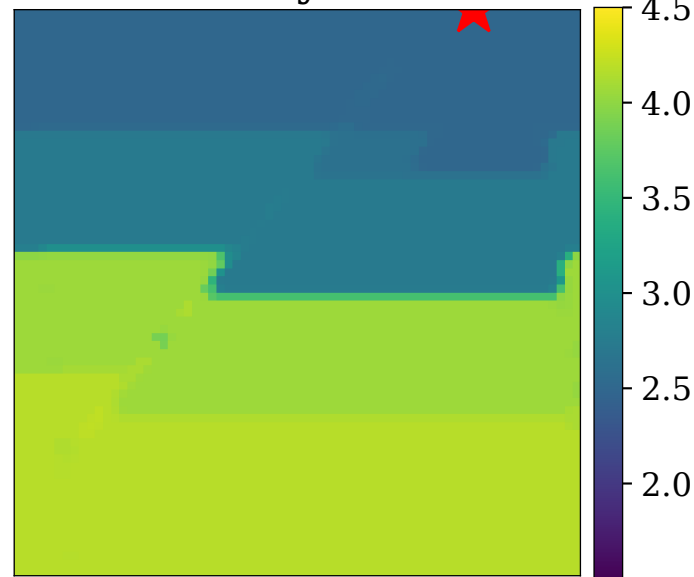

Ground Truth Time

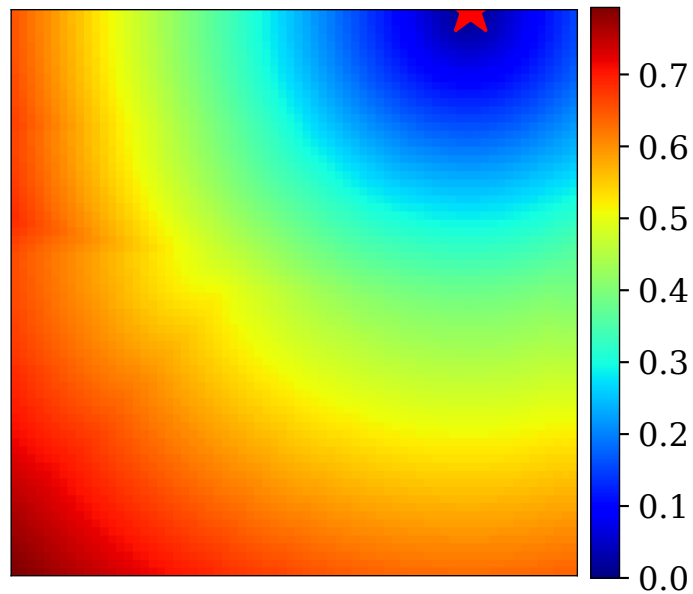

Predicted Time

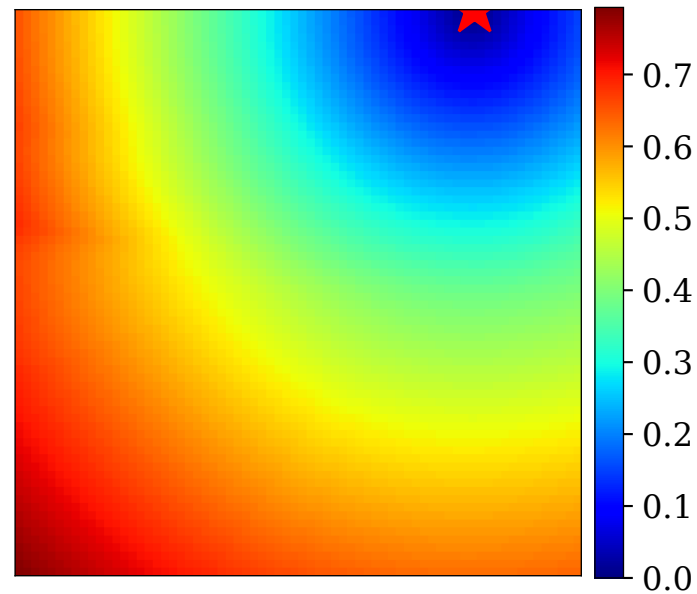

Absolute Error

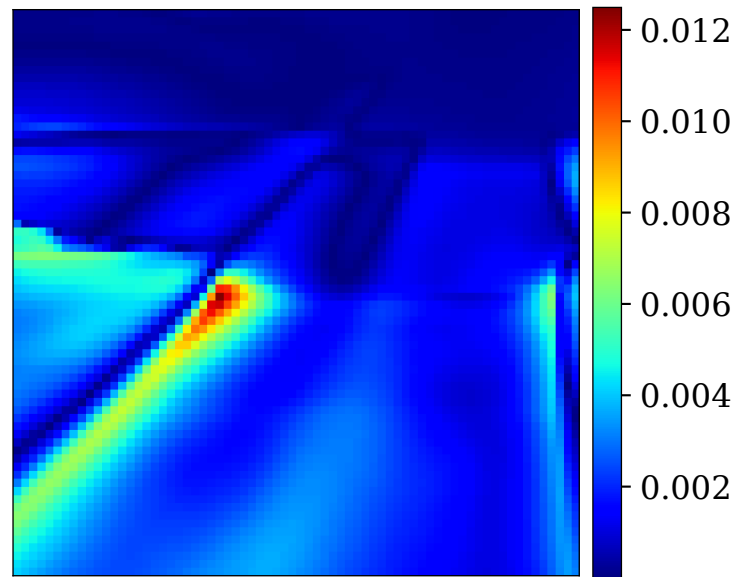

Supplement: supplementary_material [file gt_comp_top_99_(4, 0).pdf › EikonalENF_Jax-clean/experiments/fitting/figures/fwi_flatfault_a/test/gt_comp_top_99_(4, 0).pdf]

Velocity Field

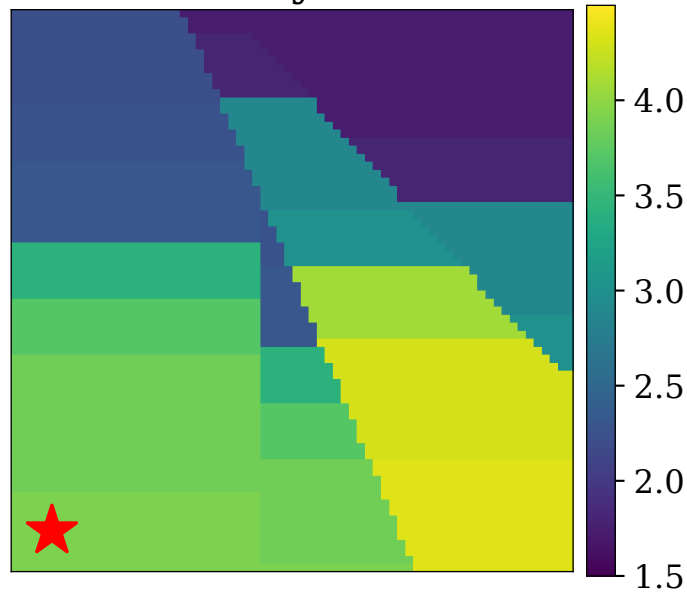

Ground Truth Time

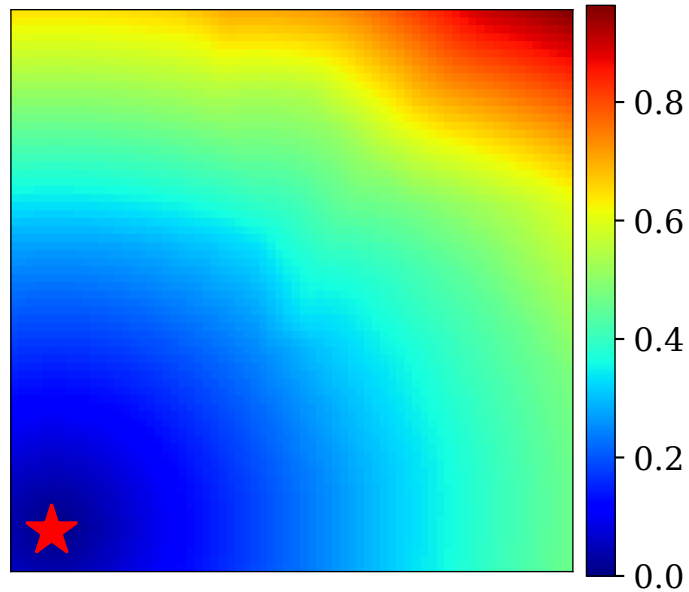

Predicted Time

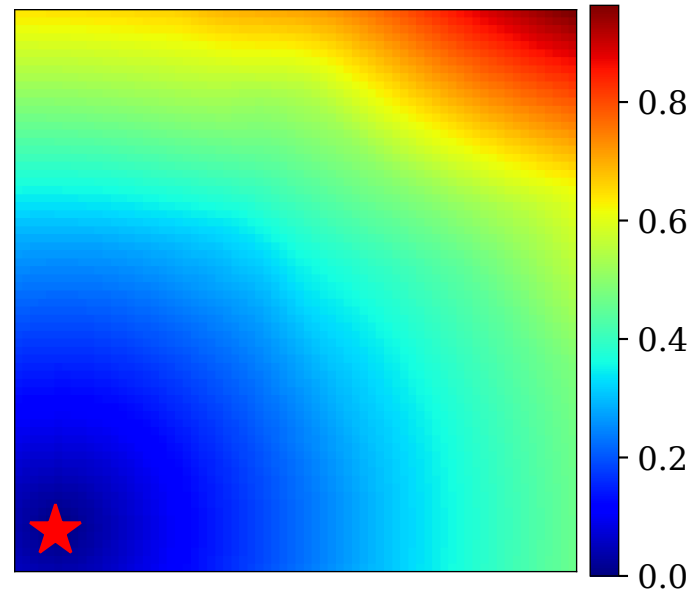

Absolute Error

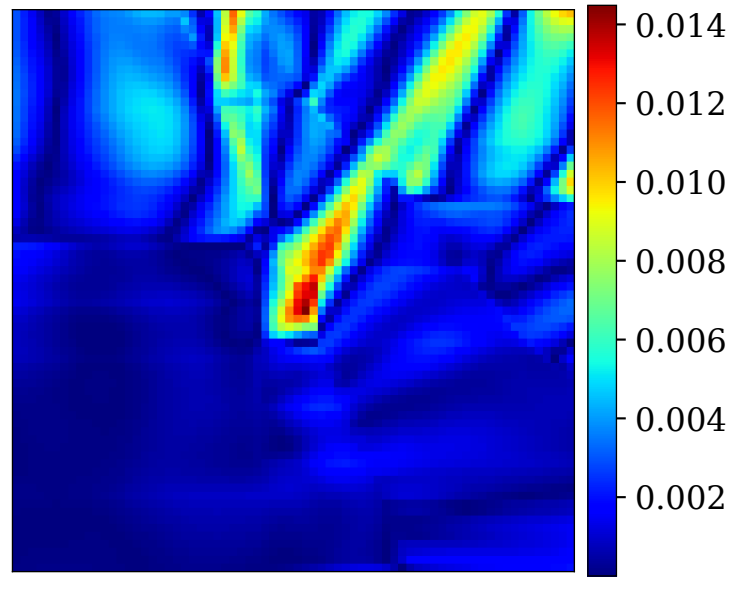

Supplement: supplementary_material [file gt_comp_full_98_(1, 1).pdf › EikonalENF_Jax-clean/experiments/fitting/figures/fwi_flatfault_b/test/gt_comp_full_98_(1, 1).pdf]

Velocity Field

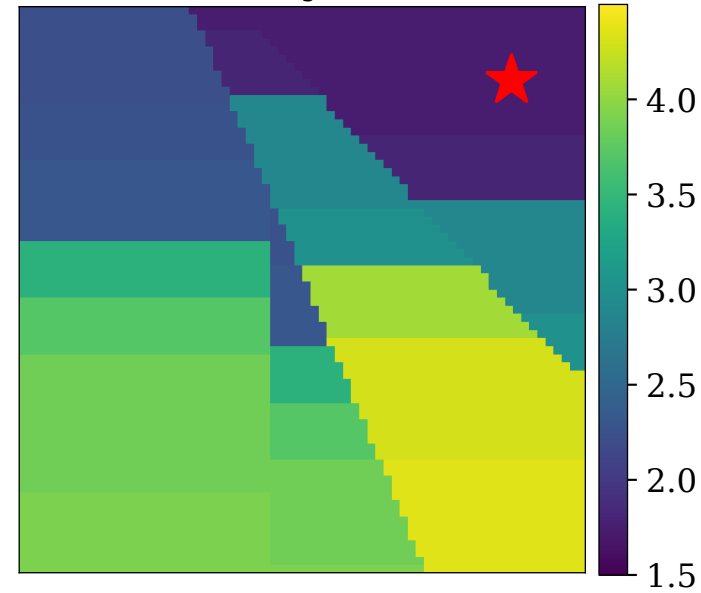

Ground Truth Time

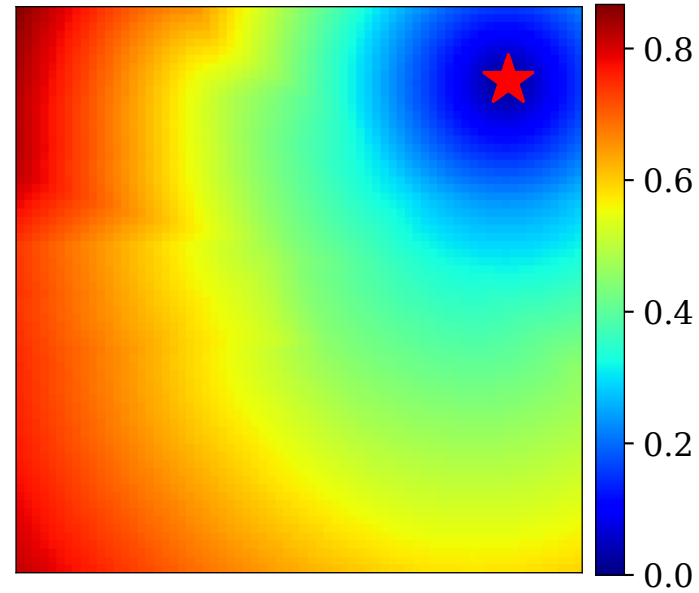

Predicted Time

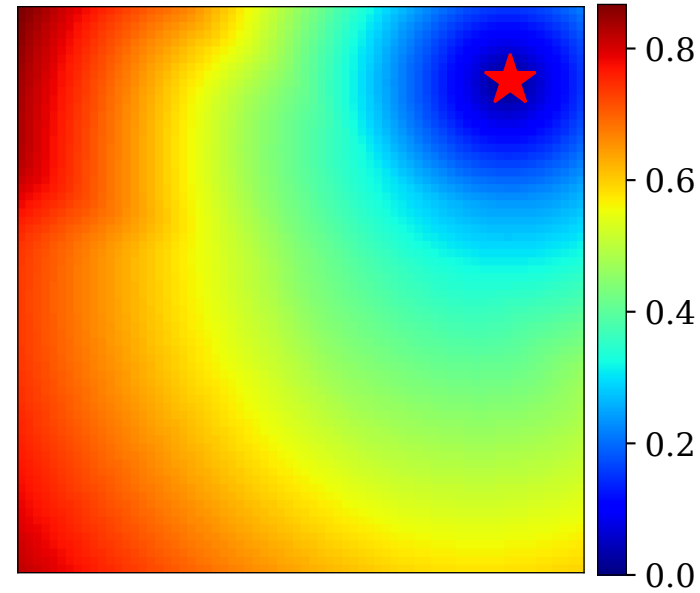

Absolute Error

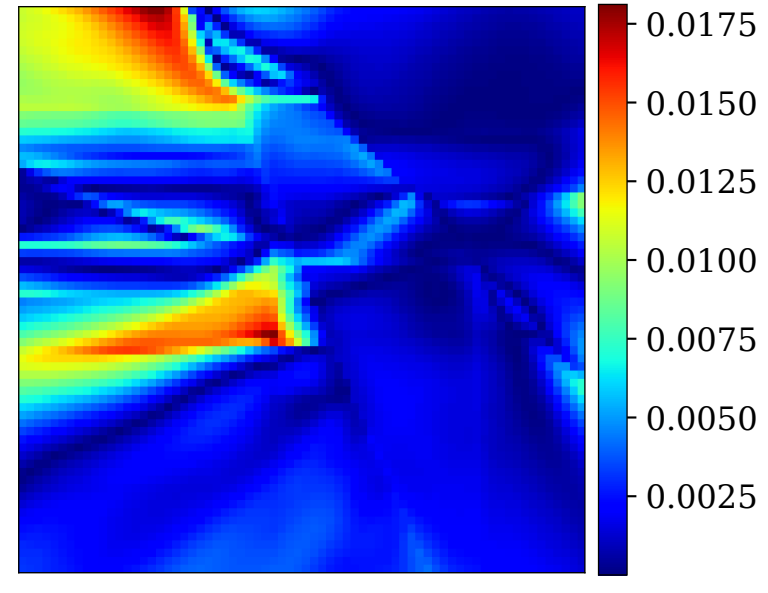

Supplement: supplementary_material [file gt_comp_full_98_(12, 12).pdf › EikonalENF_Jax-clean/experiments/fitting/figures/fwi_flatfault_b/test/gt_comp_full_98_(12, 12).pdf]

Velocity Field

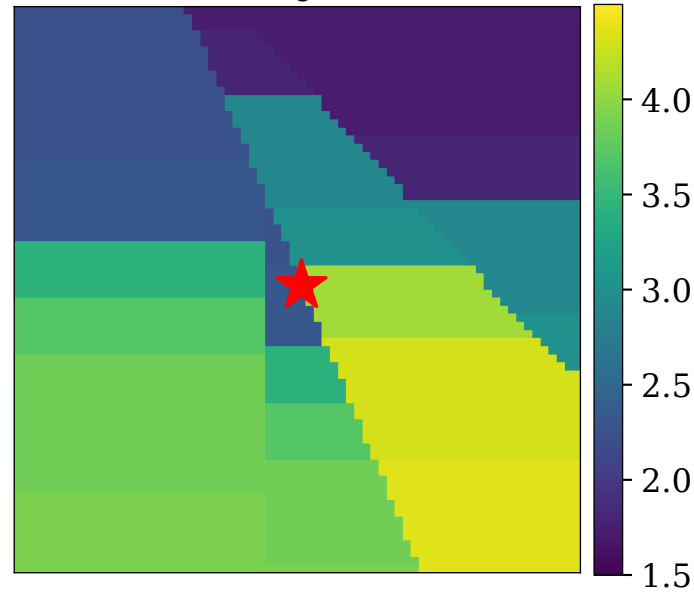

Ground Truth Time

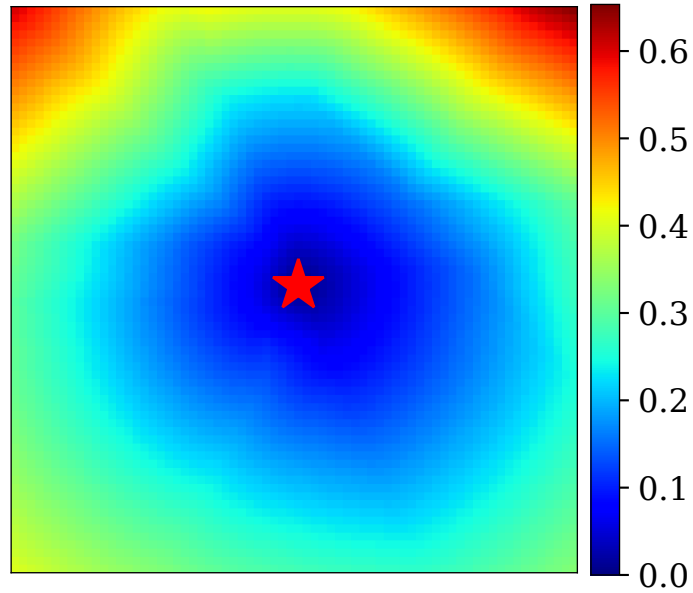

Predicted Time

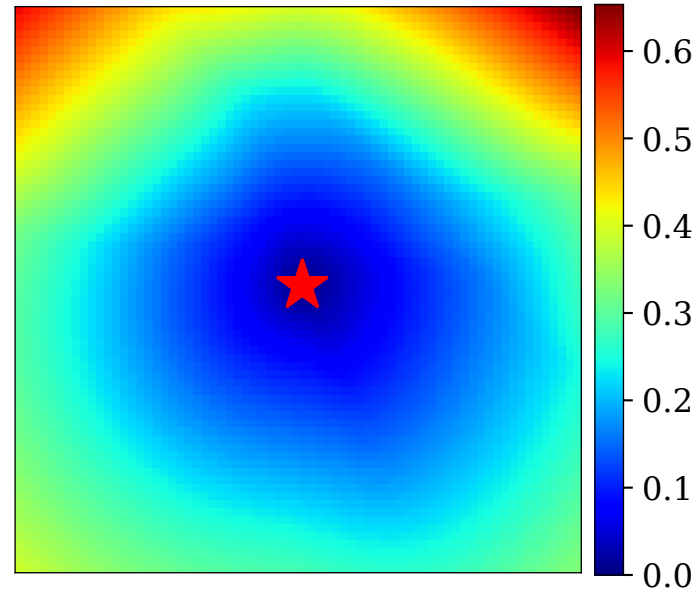

Absolute Error

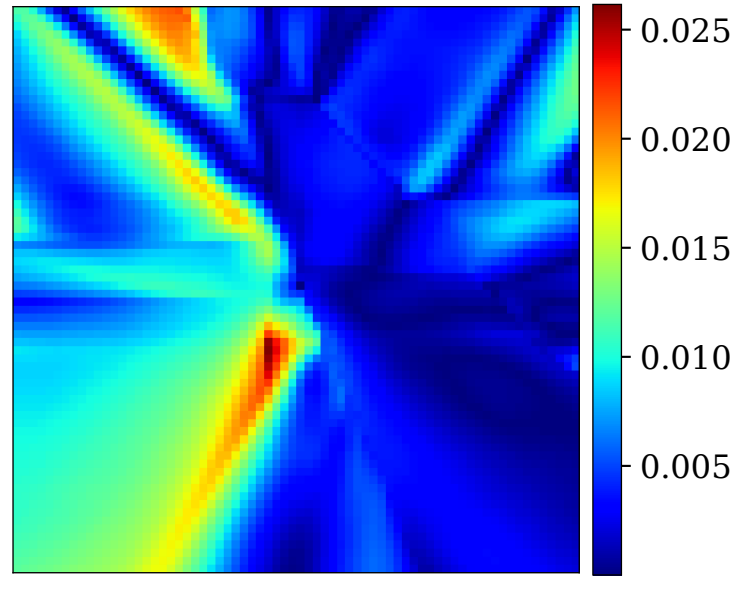

Supplement: supplementary_material [file gt_comp_full_98_(7, 7).pdf › EikonalENF_Jax-clean/experiments/fitting/figures/fwi_flatfault_b/test/gt_comp_full_98_(7, 7).pdf]

Velocity Field

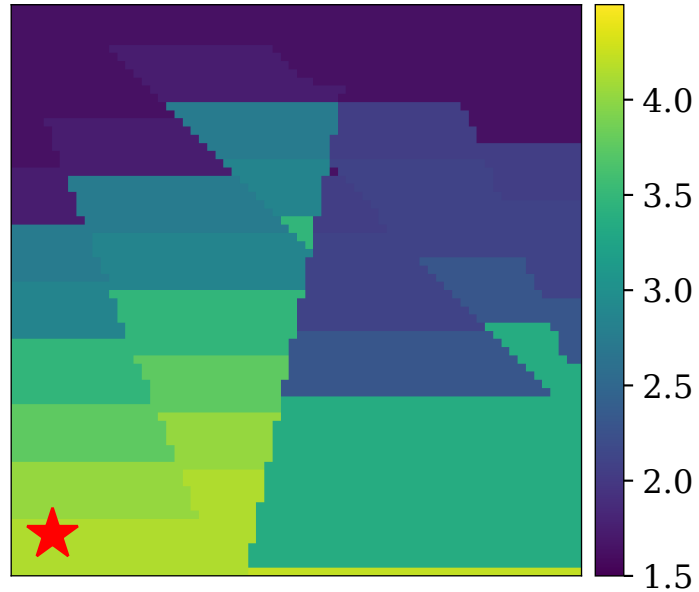

Ground Truth Time

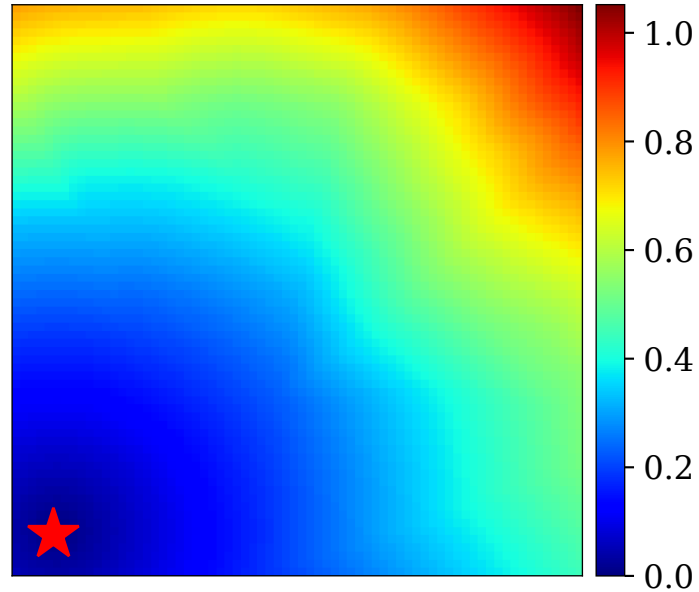

Predicted Time

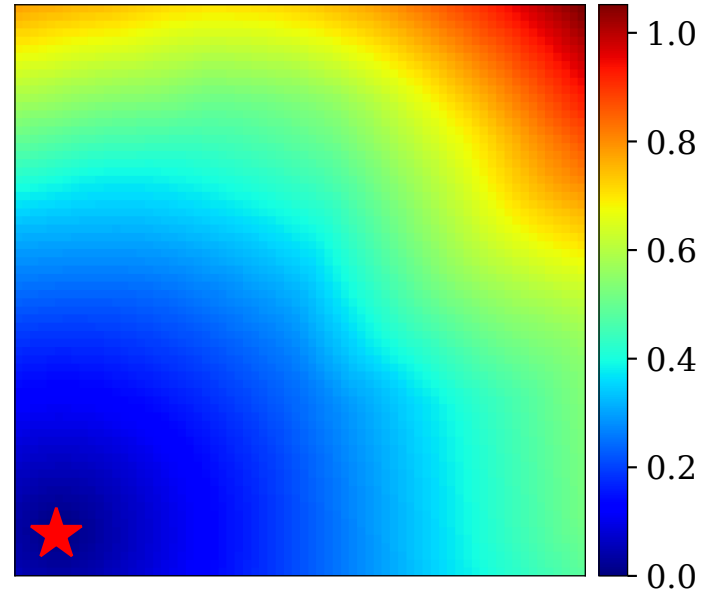

Absolute Error

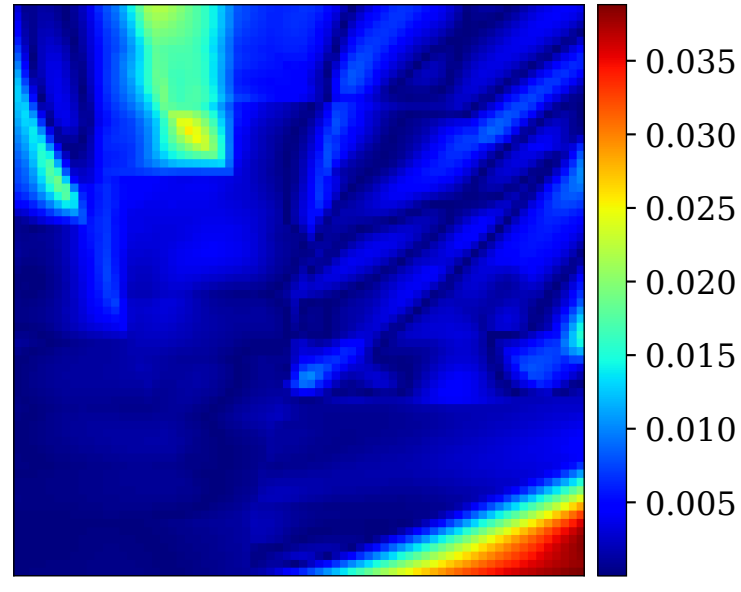

Supplement: supplementary_material [file gt_comp_full_99_(1, 1).pdf › EikonalENF_Jax-clean/experiments/fitting/figures/fwi_flatfault_b/test/gt_comp_full_99_(1, 1).pdf]

Velocity Field

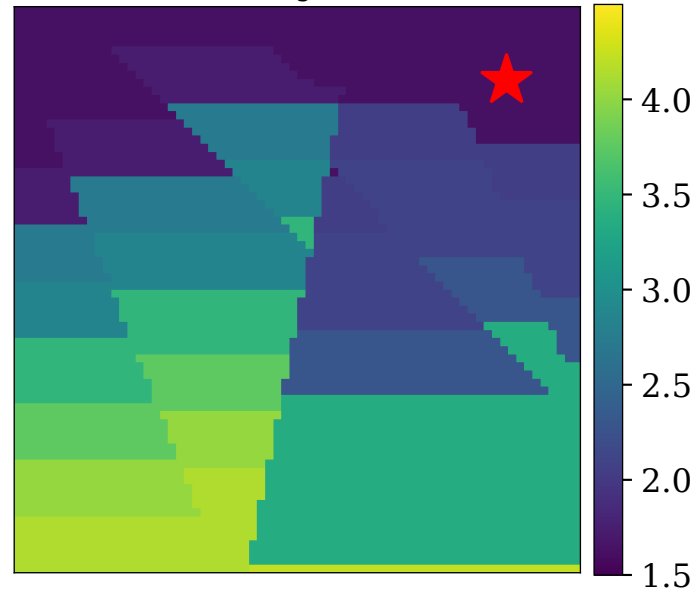

Ground Truth Time

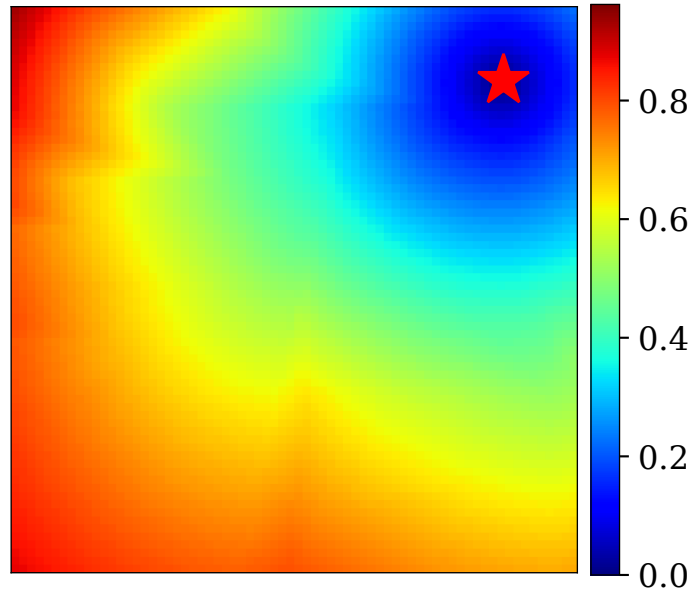

Predicted Time

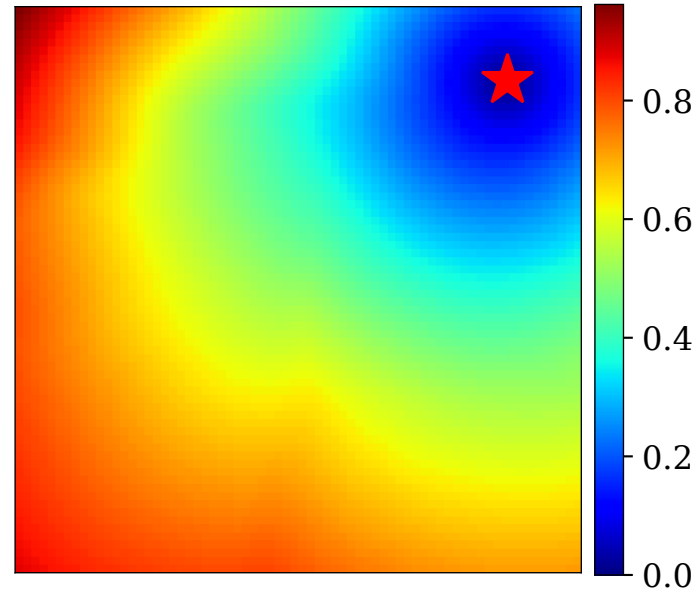

Absolute Error

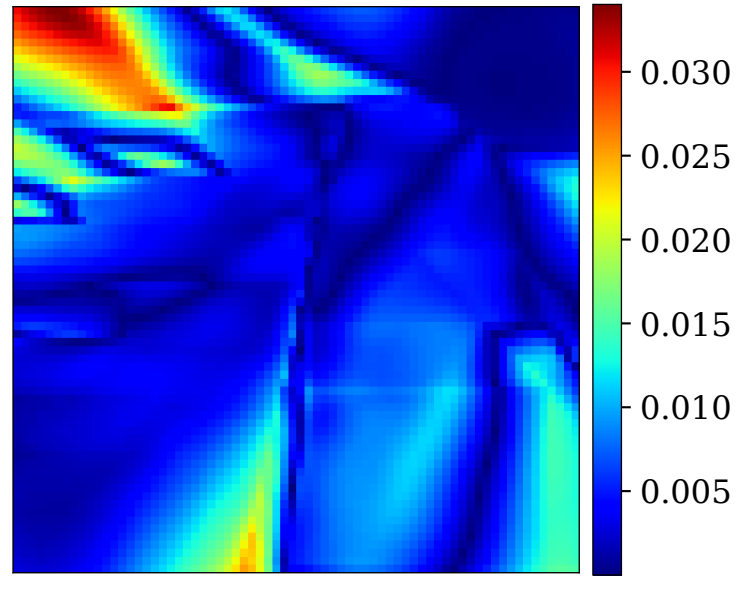

Supplement: supplementary_material [file gt_comp_full_99_(12, 12).pdf › EikonalENF_Jax-clean/experiments/fitting/figures/fwi_flatfault_b/test/gt_comp_full_99_(12, 12).pdf]

Velocity Field

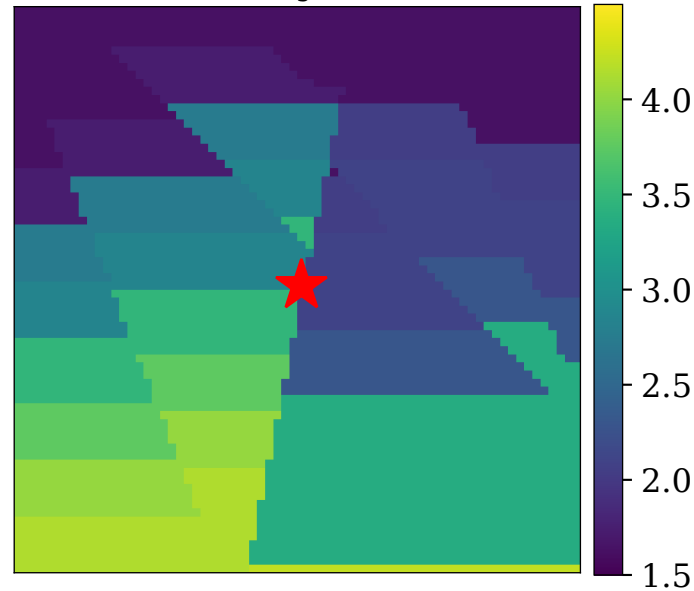

Ground Truth Time

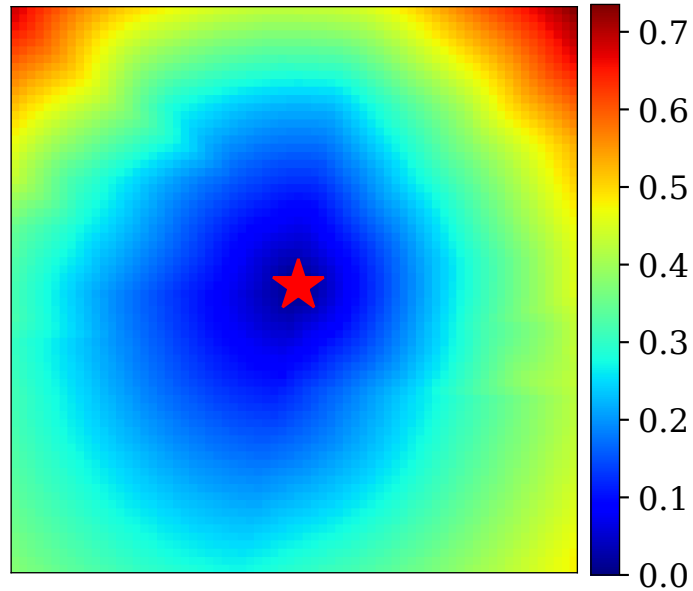

Predicted Time

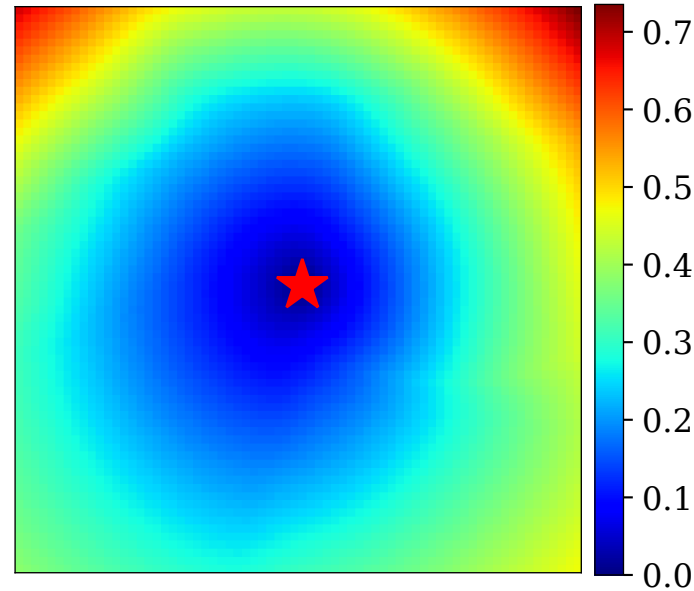

Absolute Error

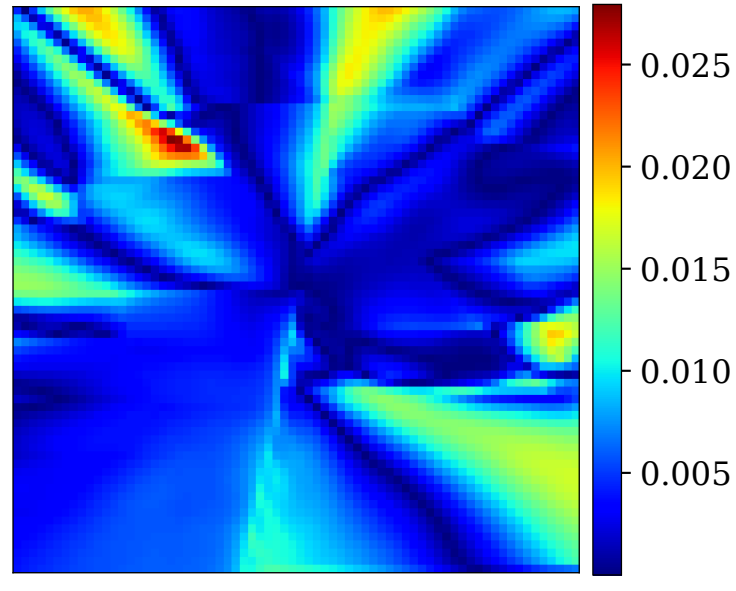

Supplement: supplementary_material [file gt_comp_full_99_(7, 7).pdf › EikonalENF_Jax-clean/experiments/fitting/figures/fwi_flatfault_b/test/gt_comp_full_99_(7, 7).pdf]

Velocity Field

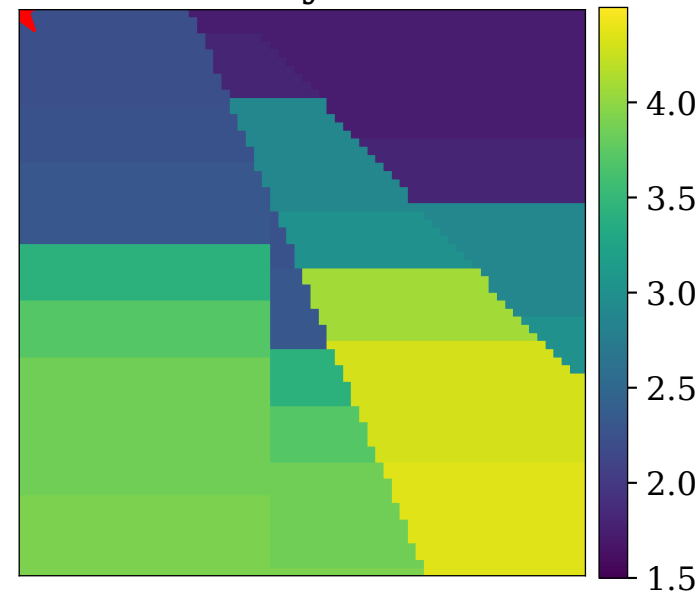

Ground Truth Time

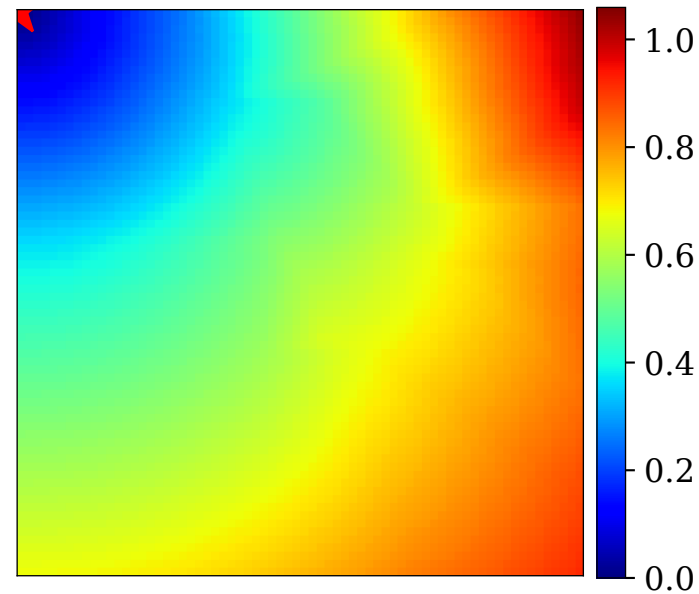

Predicted Time

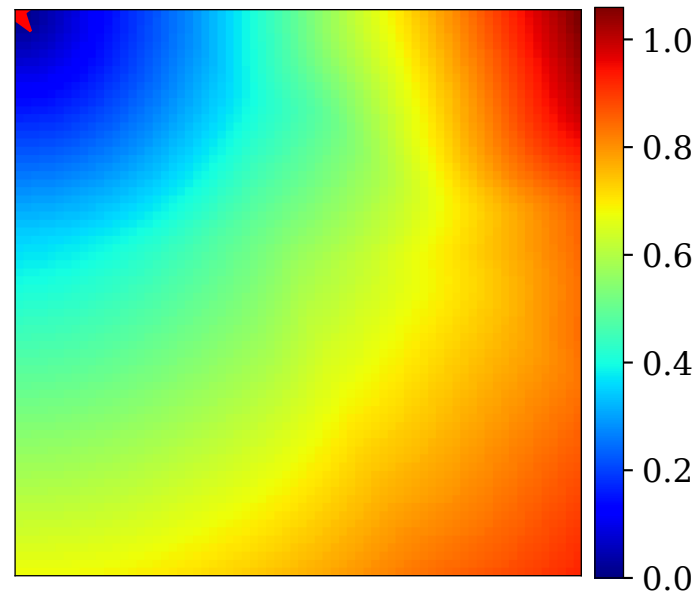

Absolute Error

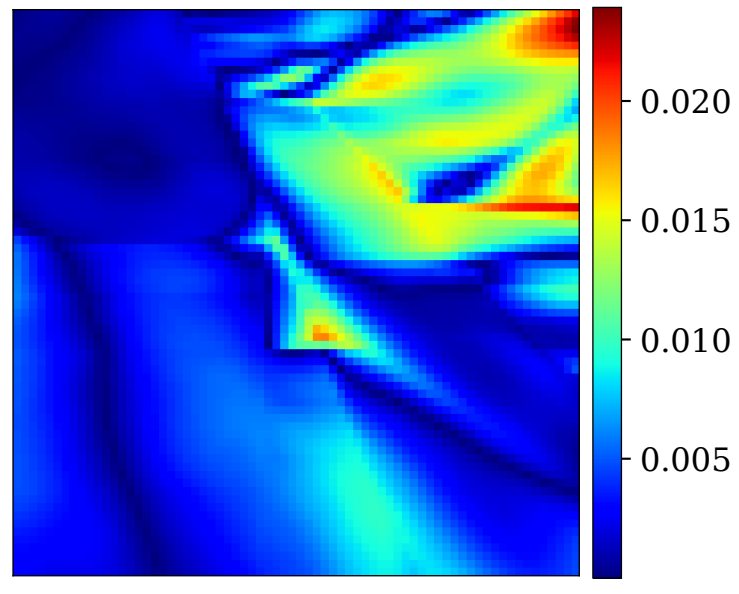

Supplement: supplementary_material [file gt_comp_top_98_(0, 0).pdf › EikonalENF_Jax-clean/experiments/fitting/figures/fwi_flatfault_b/test/gt_comp_top_98_(0, 0).pdf]

Velocity Field

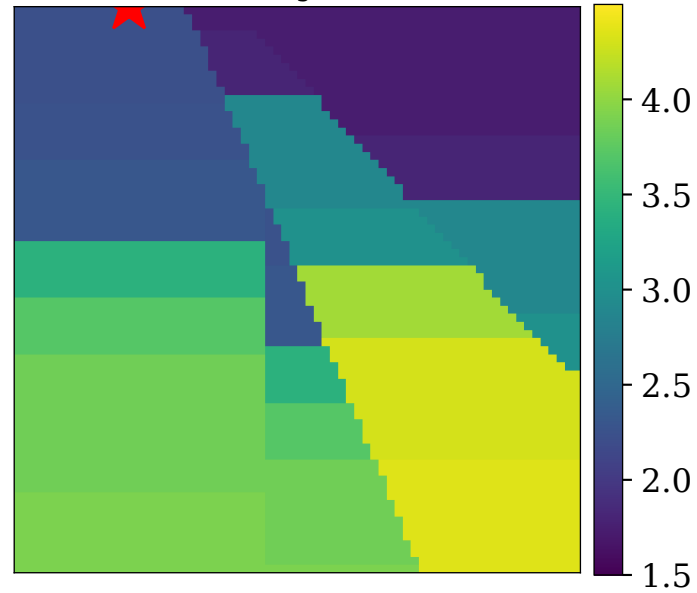

Ground Truth Time

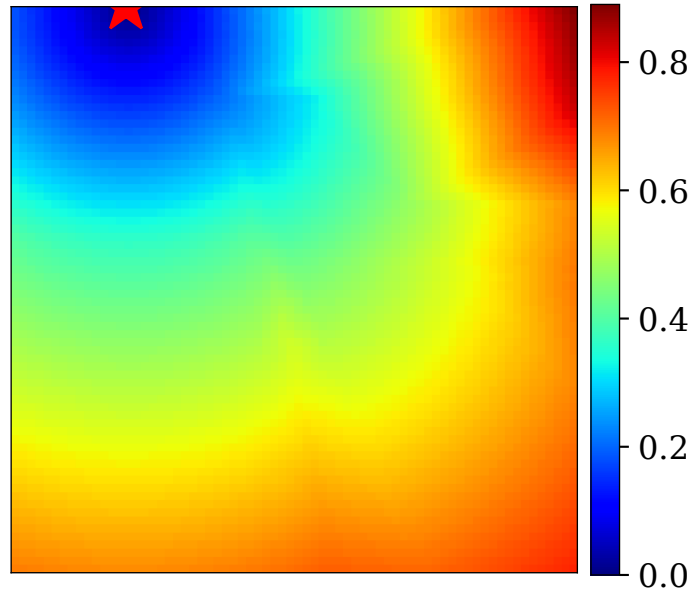

Predicted Time

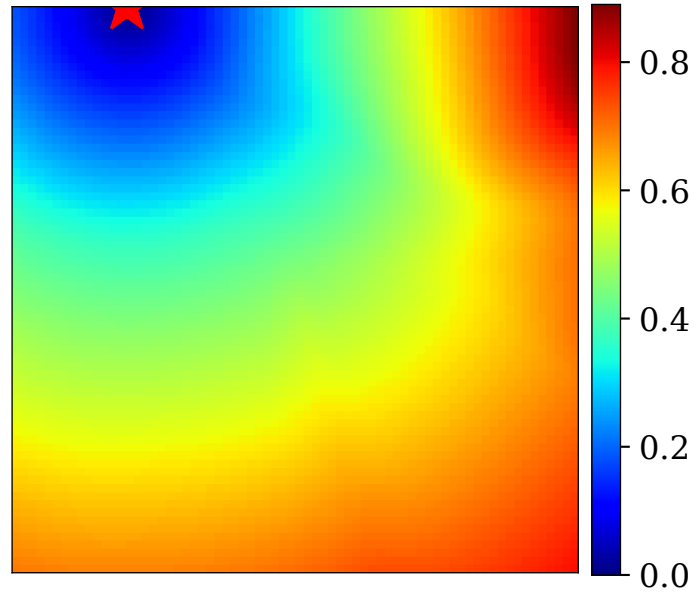

Absolute Error

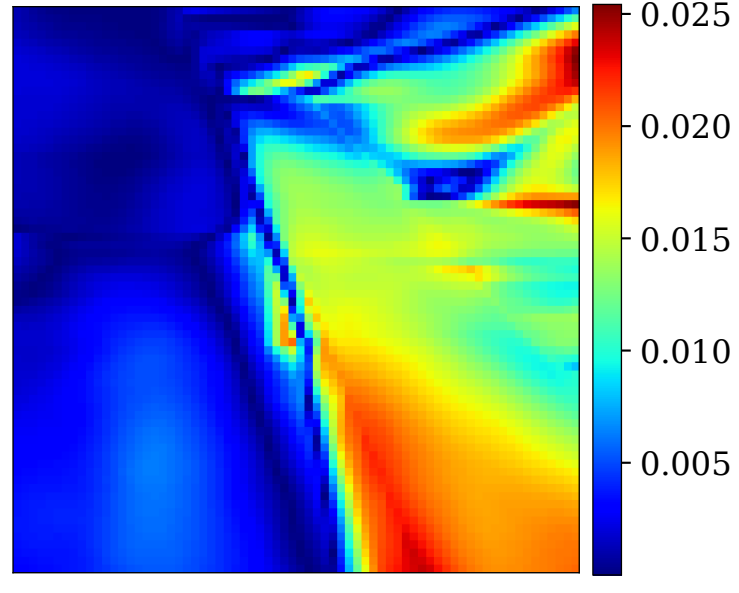

Supplement: supplementary_material [file gt_comp_top_98_(1, 0).pdf › EikonalENF_Jax-clean/experiments/fitting/figures/fwi_flatfault_b/test/gt_comp_top_98_(1, 0).pdf]

Velocity Field

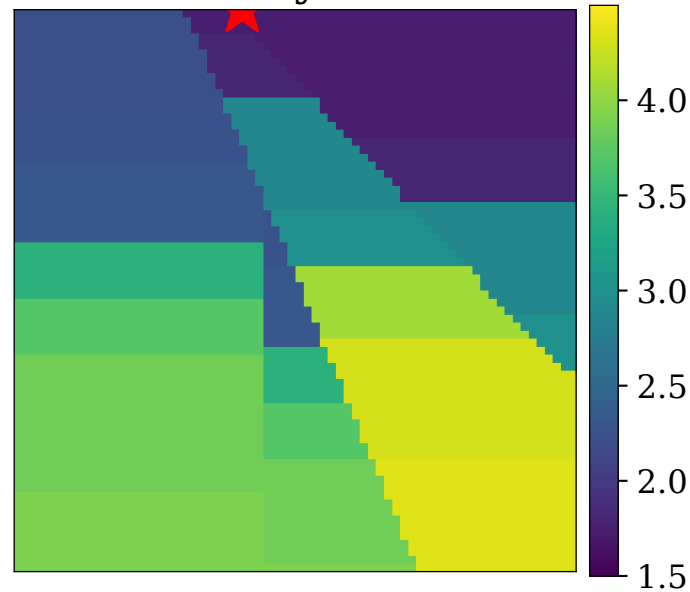

Ground Truth Time

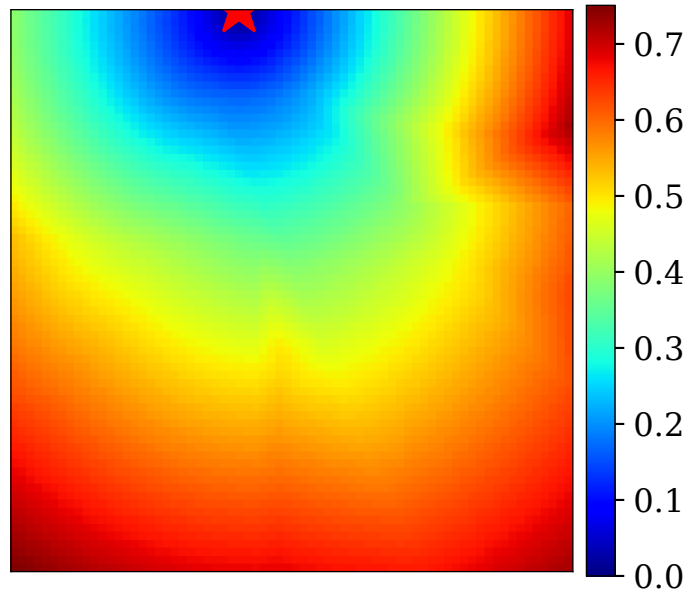

Predicted Time

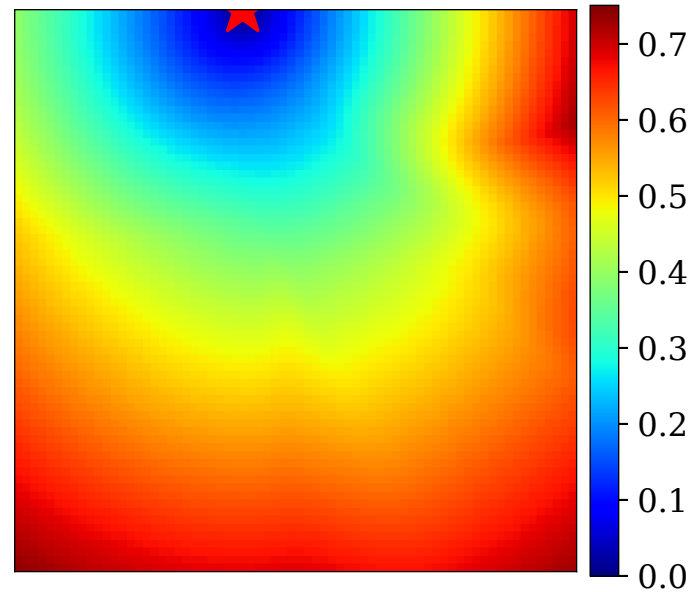

Absolute Error

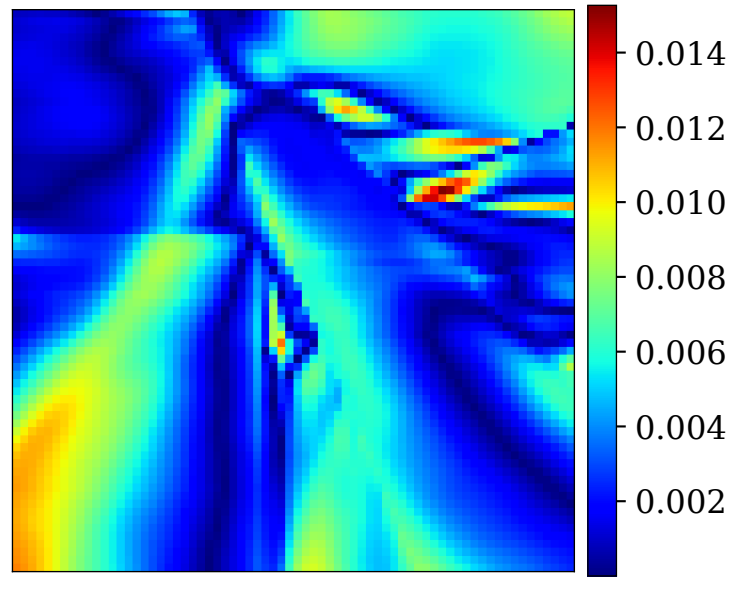

Supplement: supplementary_material [file gt_comp_top_98_(2, 0).pdf › EikonalENF_Jax-clean/experiments/fitting/figures/fwi_flatfault_b/test/gt_comp_top_98_(2, 0).pdf]

Velocity Field

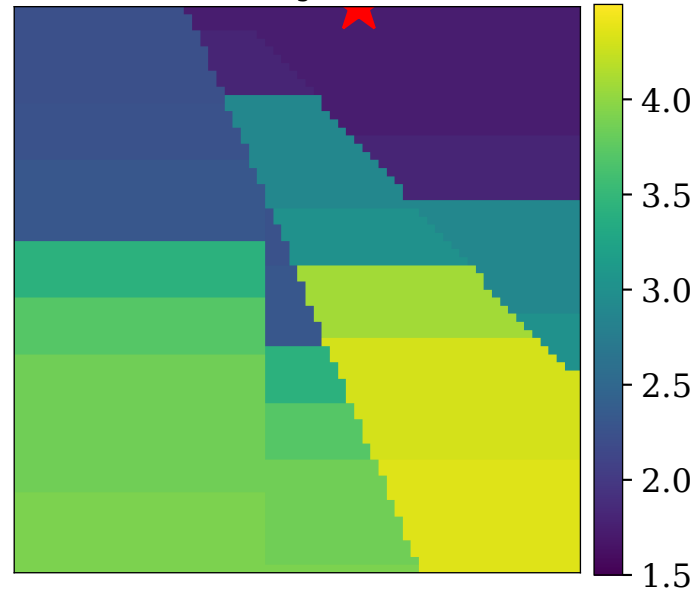

Ground Truth Time

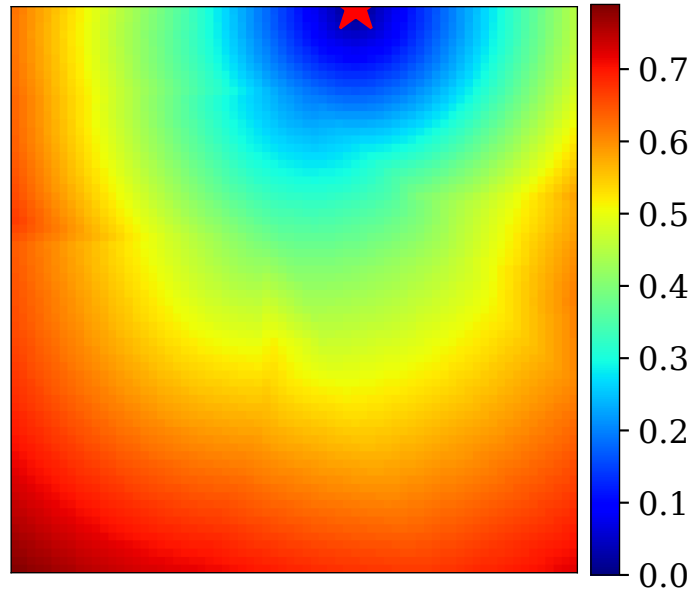

Predicted Time

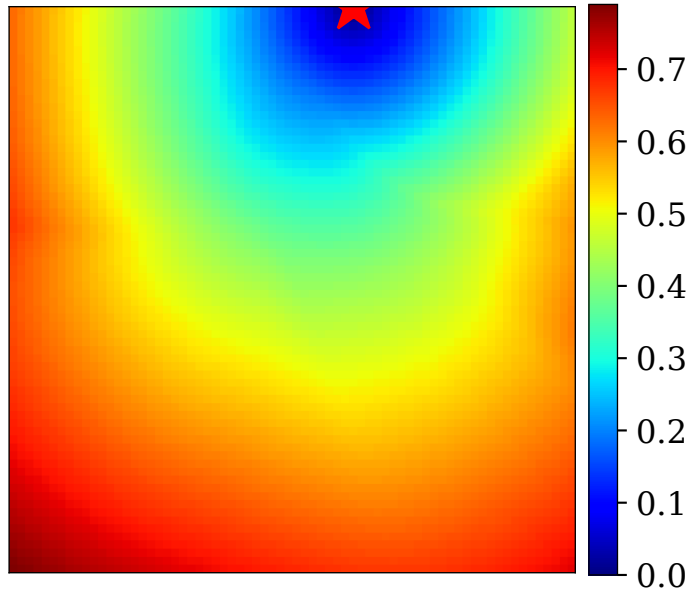

Absolute Error

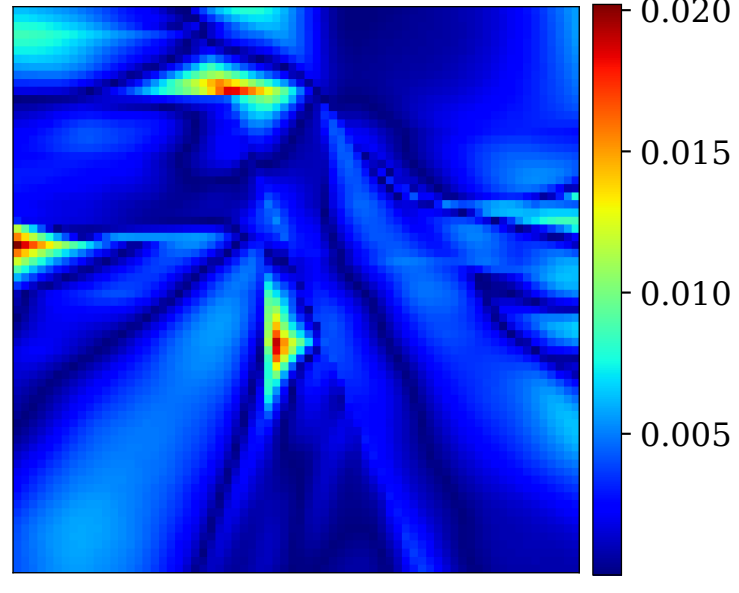

Supplement: supplementary_material [file gt_comp_top_98_(3, 0).pdf › EikonalENF_Jax-clean/experiments/fitting/figures/fwi_flatfault_b/test/gt_comp_top_98_(3, 0).pdf]

Velocity Field

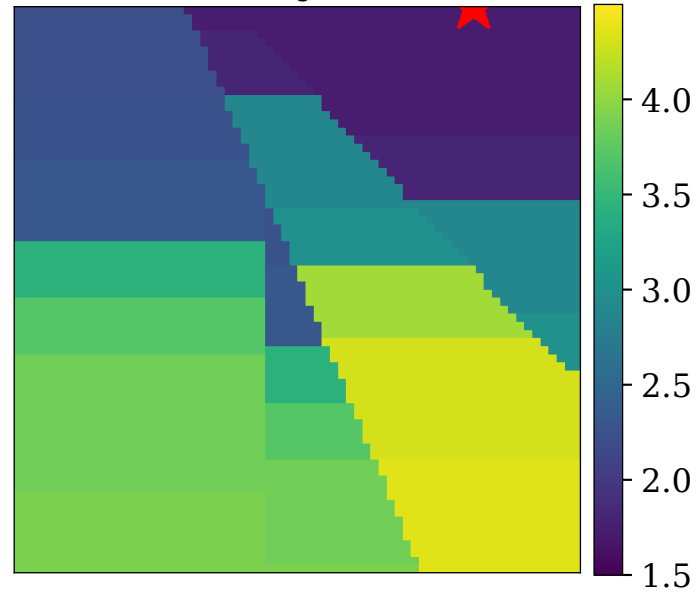

Ground Truth Time

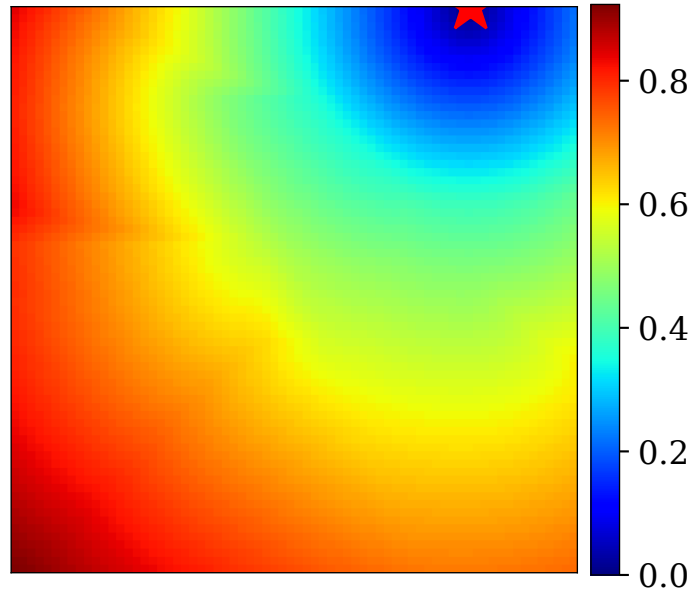

Predicted Time

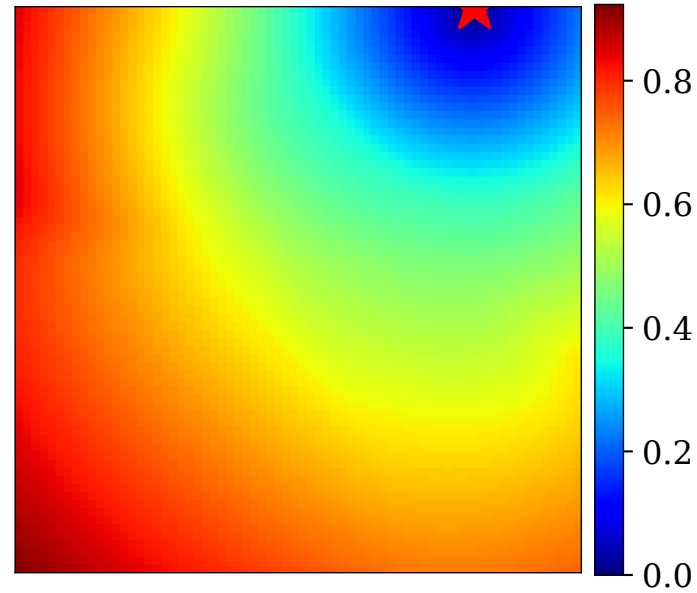

Absolute Error

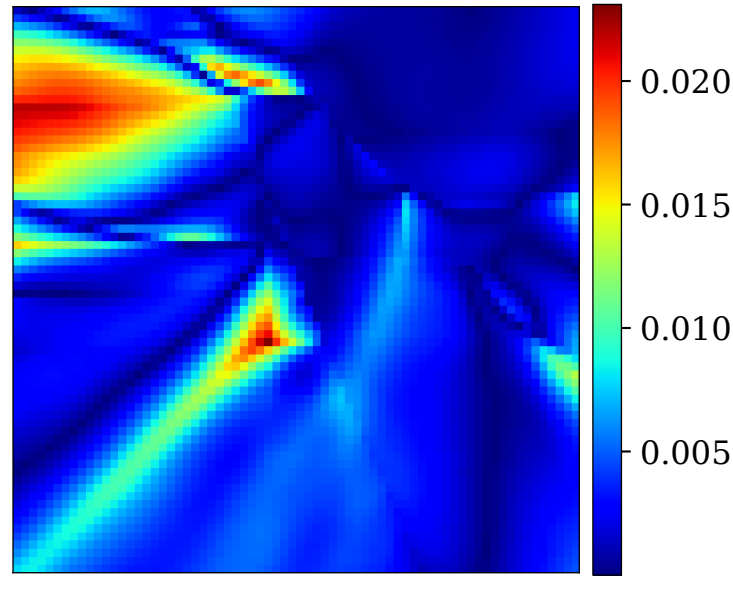

Supplement: supplementary_material [file gt_comp_top_98_(4, 0).pdf › EikonalENF_Jax-clean/experiments/fitting/figures/fwi_flatfault_b/test/gt_comp_top_98_(4, 0).pdf]

Velocity Field

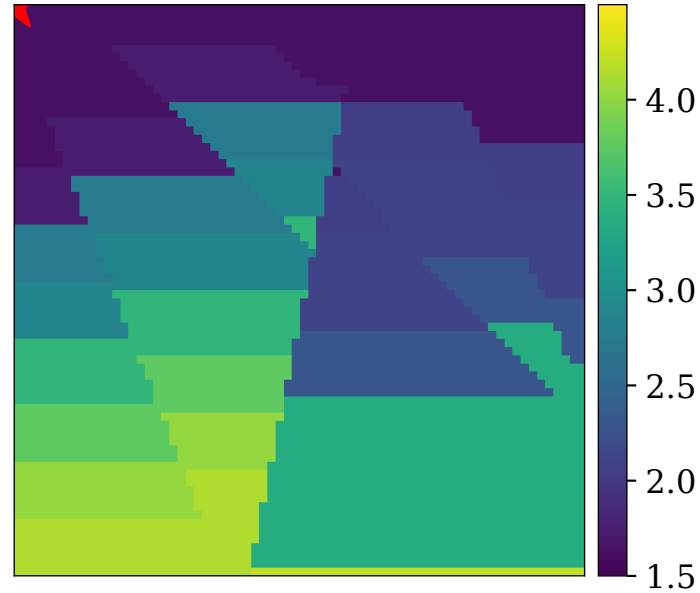

Ground Truth Time

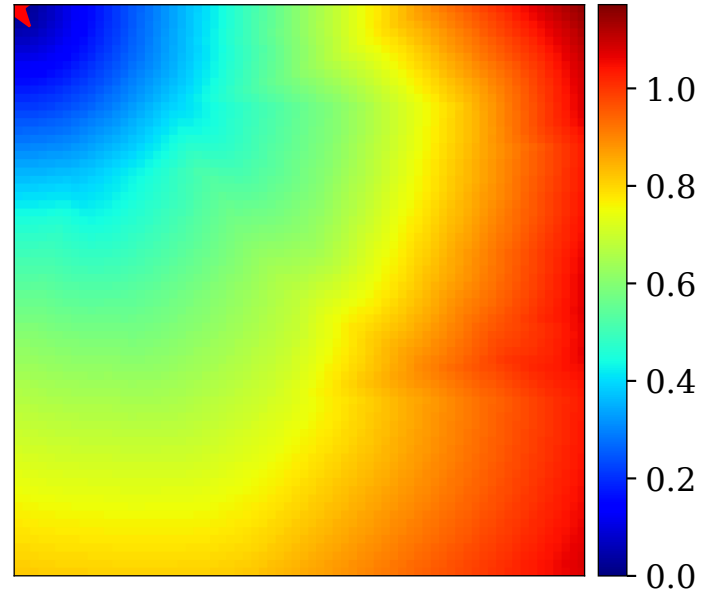

Predicted Time

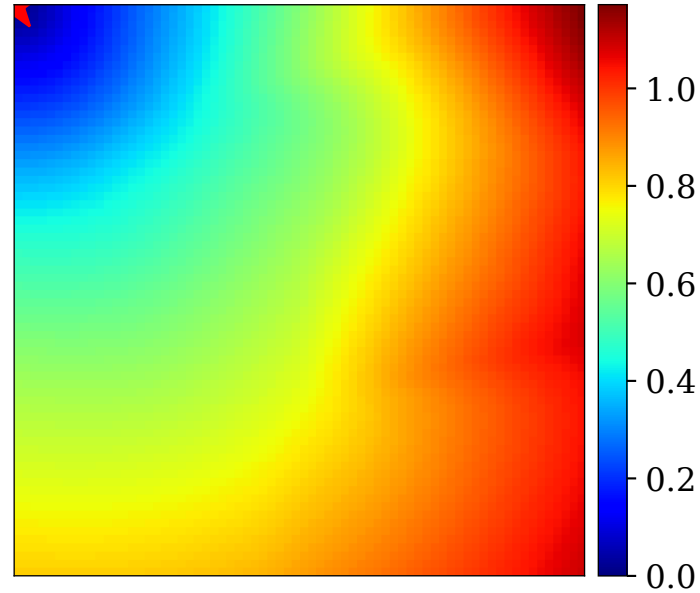

Absolute Error

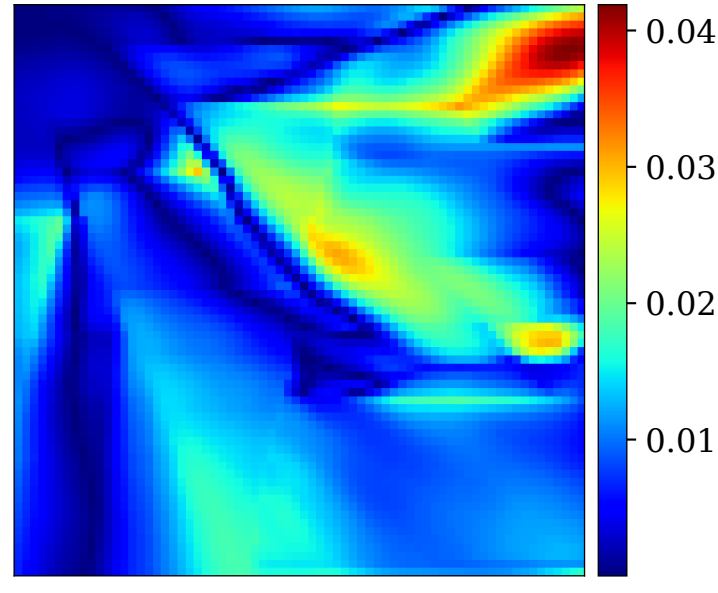

Supplement: supplementary_material [file gt_comp_top_99_(0, 0).pdf › EikonalENF_Jax-clean/experiments/fitting/figures/fwi_flatfault_b/test/gt_comp_top_99_(0, 0).pdf]

Velocity Field

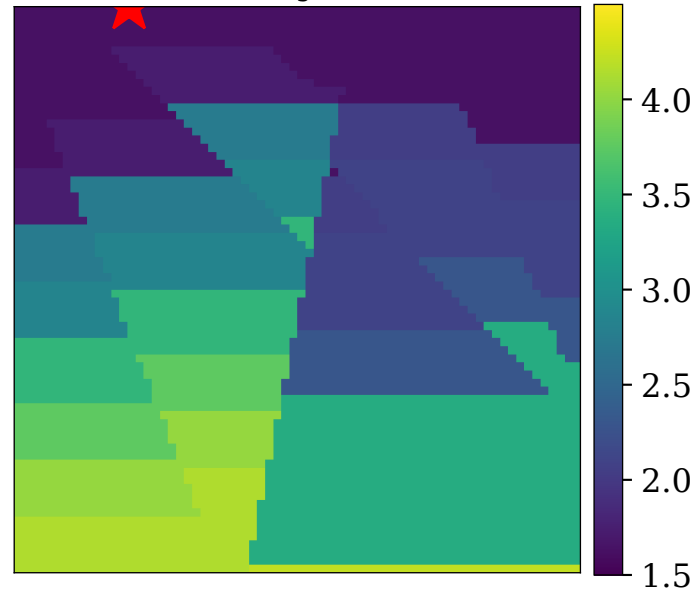

Ground Truth Time

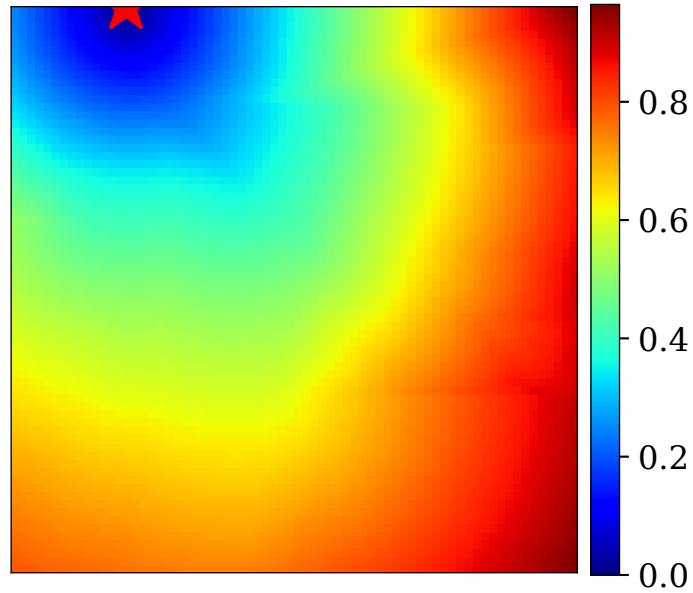

Predicted Time

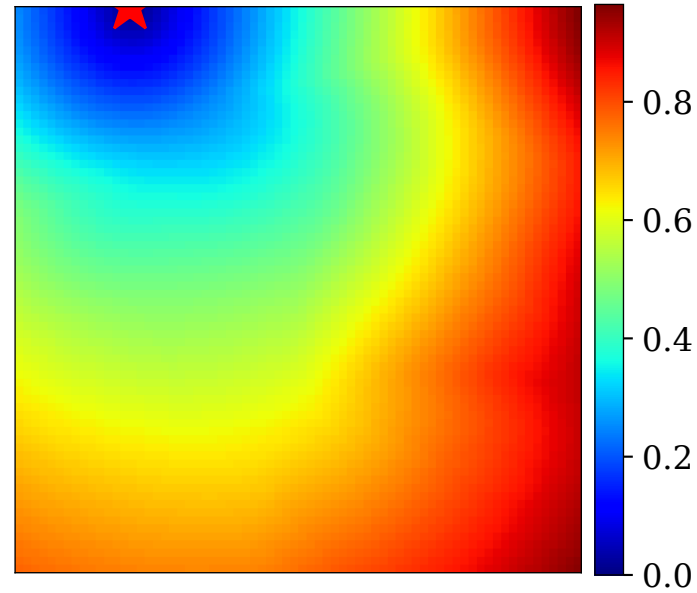

Absolute Error

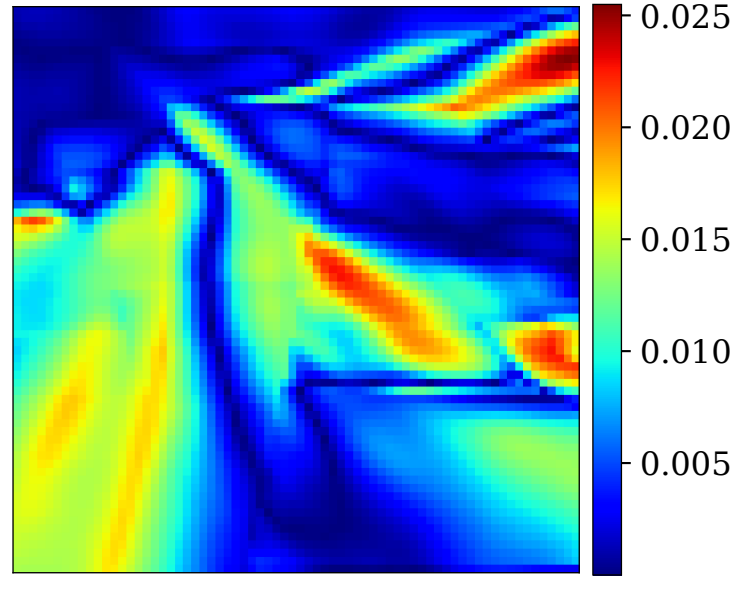

Supplement: supplementary_material [file gt_comp_top_99_(1, 0).pdf › EikonalENF_Jax-clean/experiments/fitting/figures/fwi_flatfault_b/test/gt_comp_top_99_(1, 0).pdf]

Velocity Field

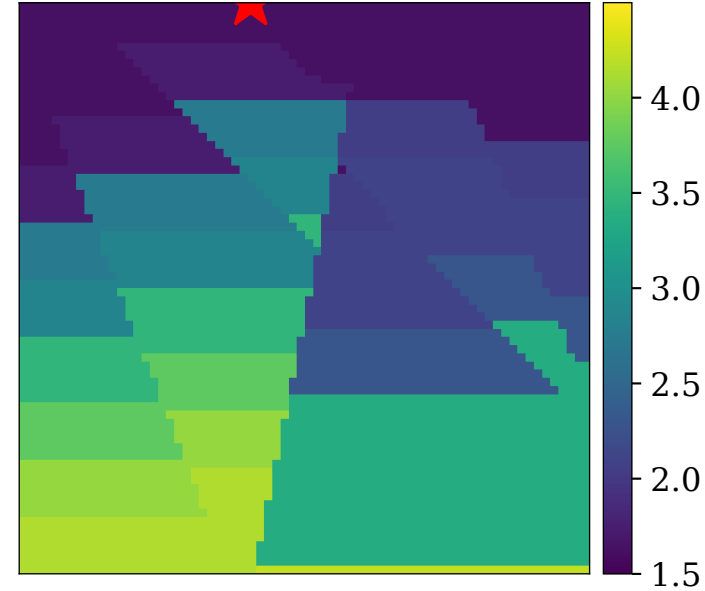

Ground Truth Time

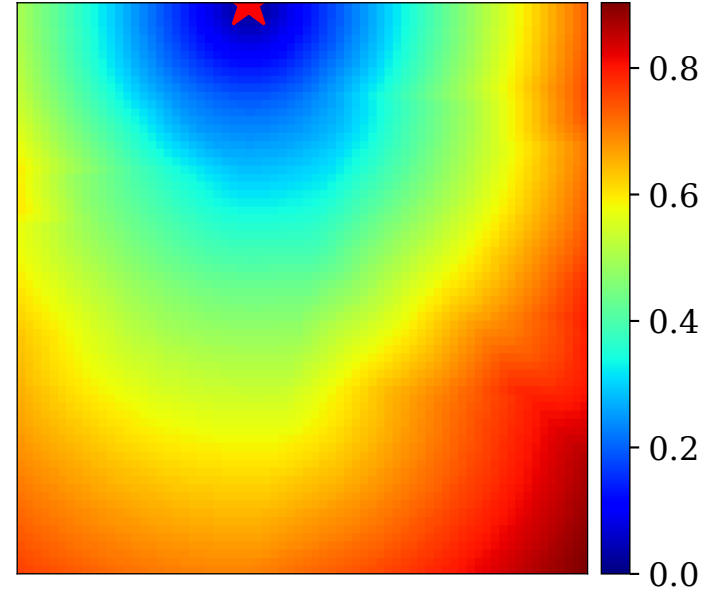

Predicted Time

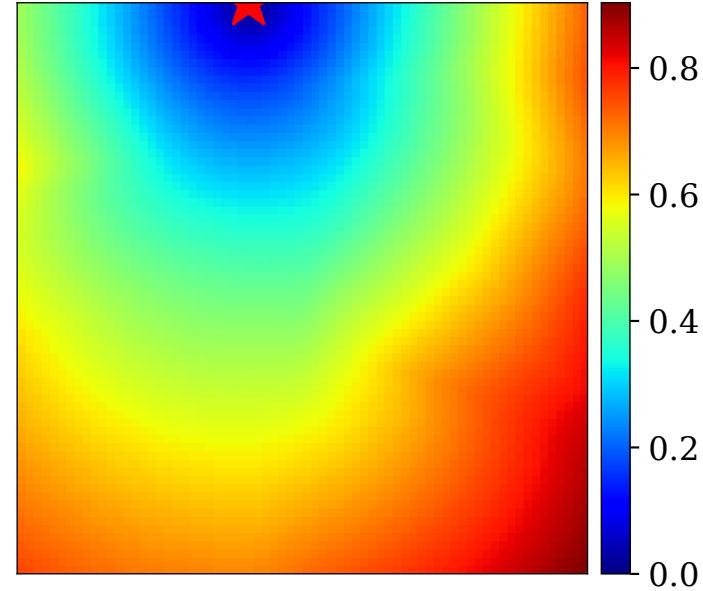

Absolute Error

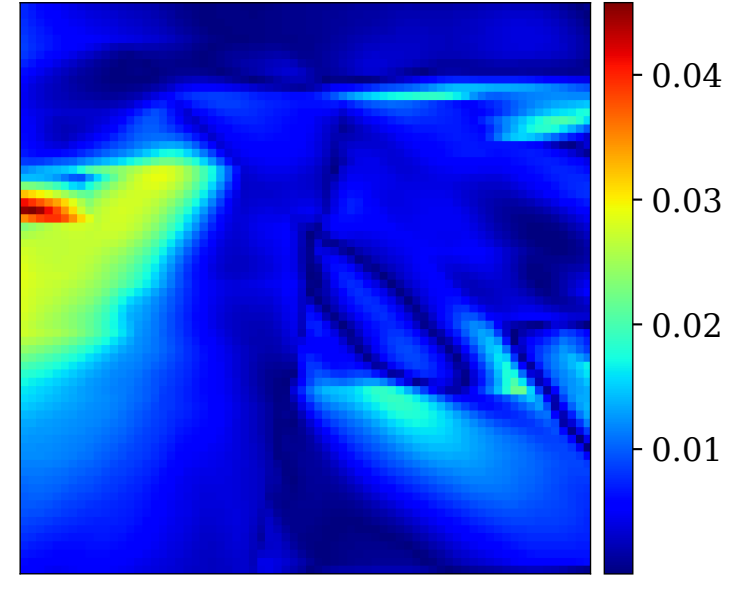

Supplement: supplementary_material [file gt_comp_top_99_(2, 0).pdf › EikonalENF_Jax-clean/experiments/fitting/figures/fwi_flatfault_b/test/gt_comp_top_99_(2, 0).pdf]

Velocity Field

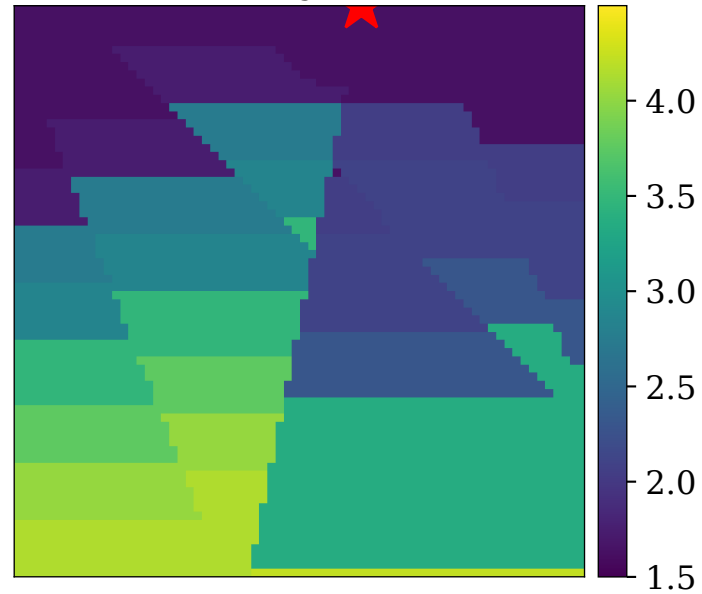

Ground Truth Time

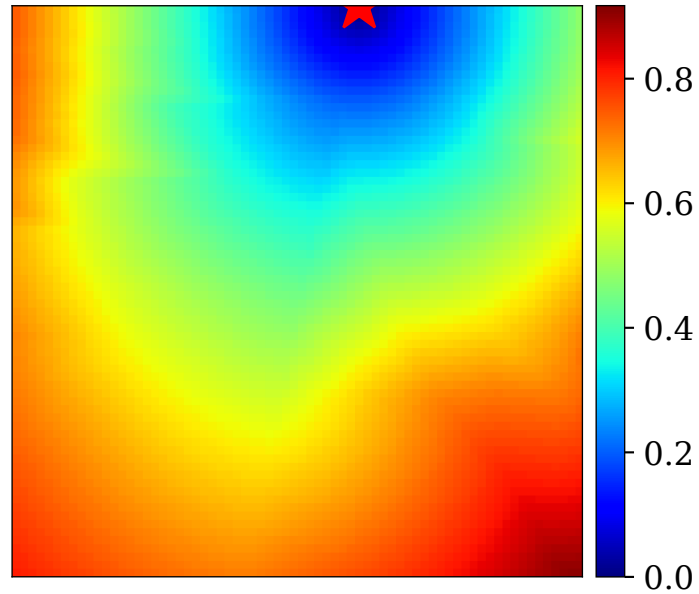

Predicted Time

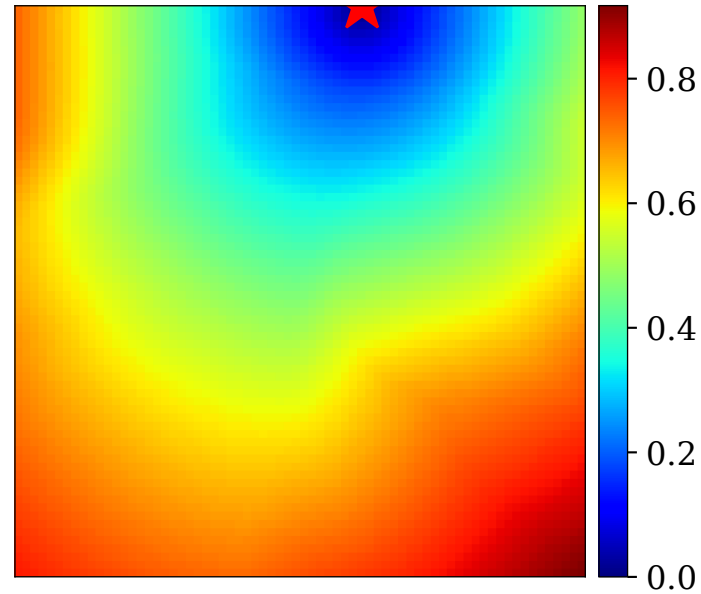

Absolute Error

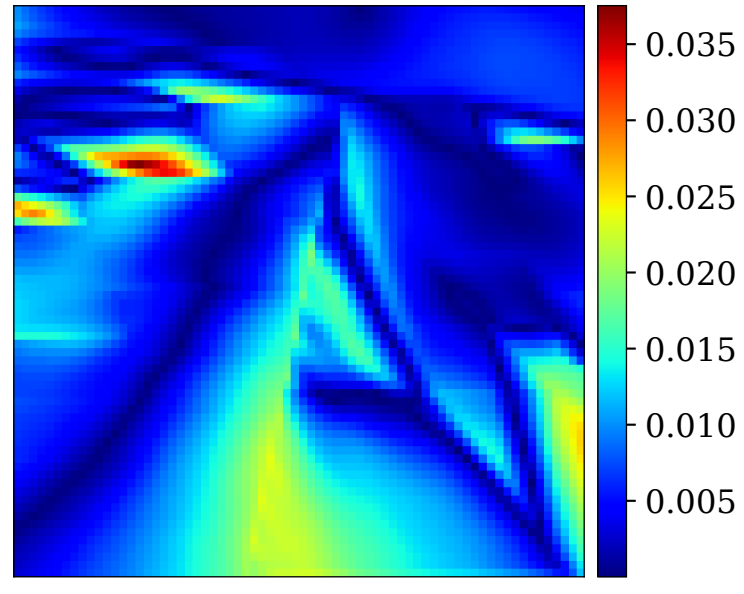

Supplement: supplementary_material [file gt_comp_top_99_(3, 0).pdf › EikonalENF_Jax-clean/experiments/fitting/figures/fwi_flatfault_b/test/gt_comp_top_99_(3, 0).pdf]

Velocity Field

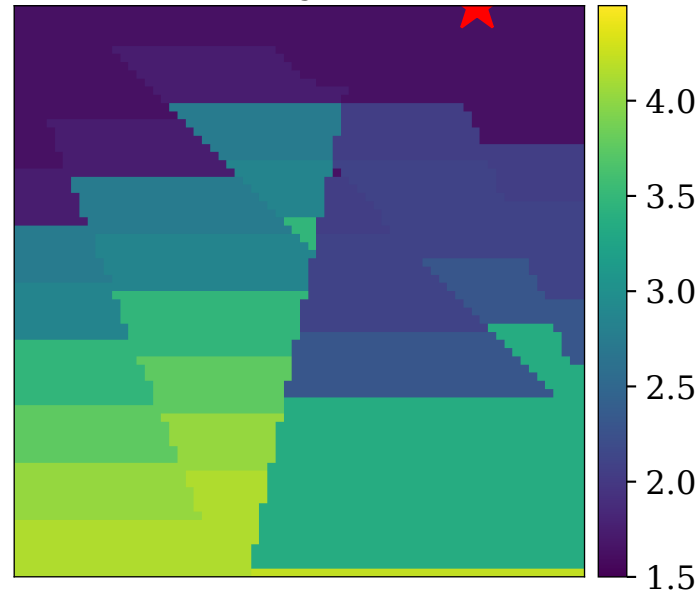

Ground Truth Time

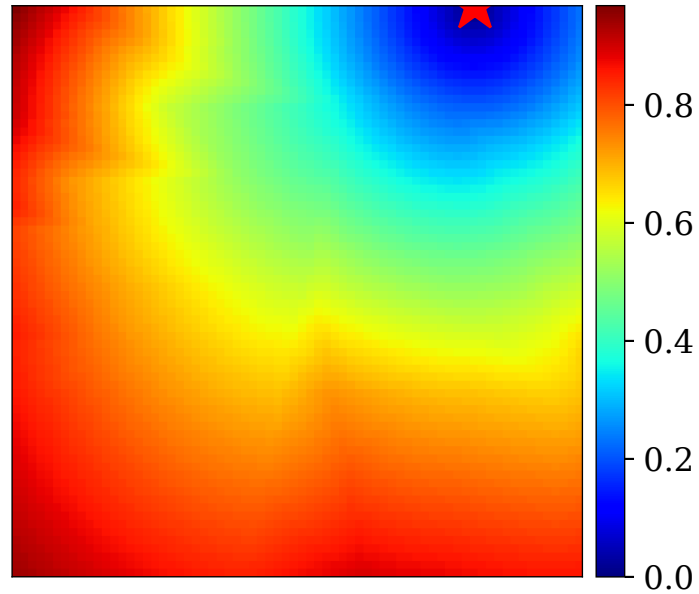

Predicted Time

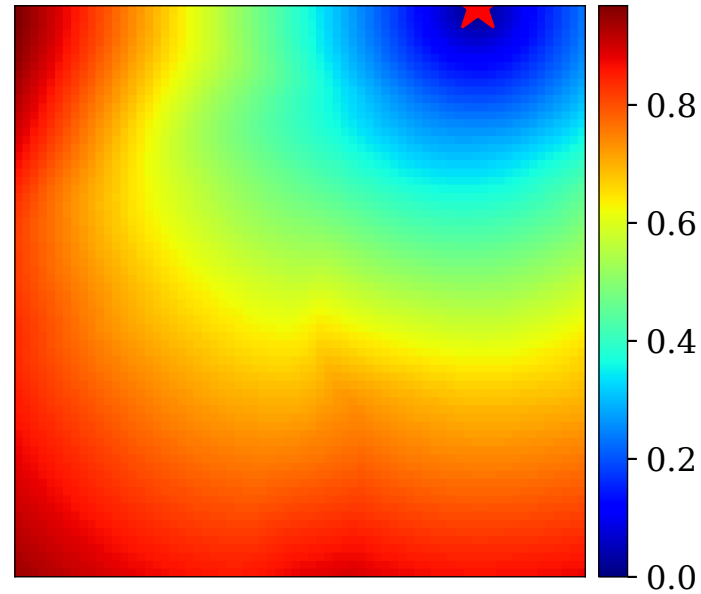

Absolute Error

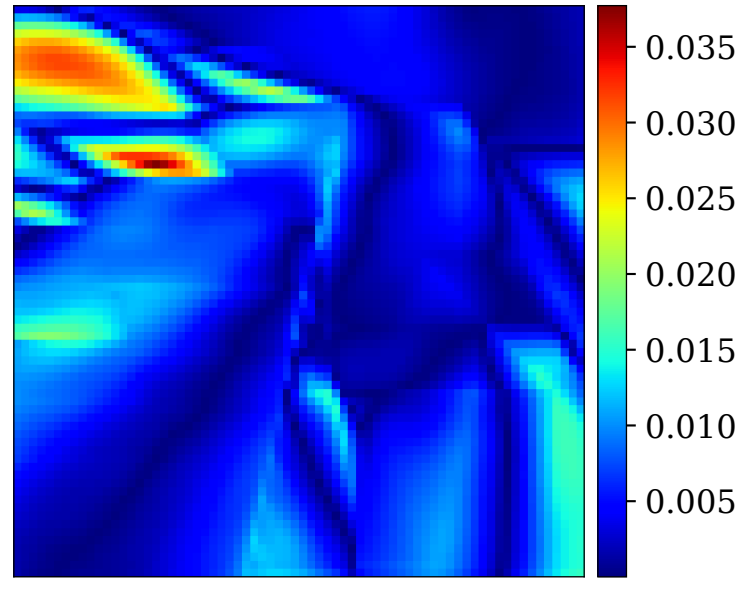

Supplement: supplementary_material [file gt_comp_top_99_(4, 0).pdf › EikonalENF_Jax-clean/experiments/fitting/figures/fwi_flatfault_b/test/gt_comp_top_99_(4, 0).pdf]

Velocity Field

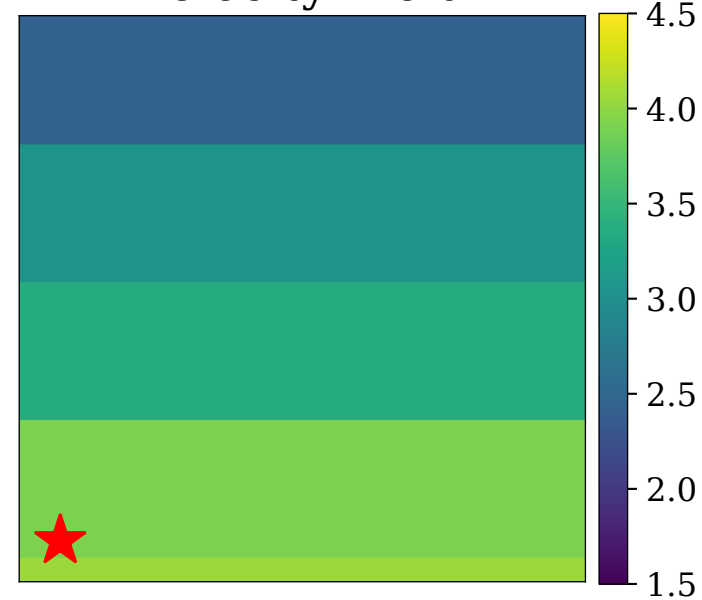

Ground Truth Time

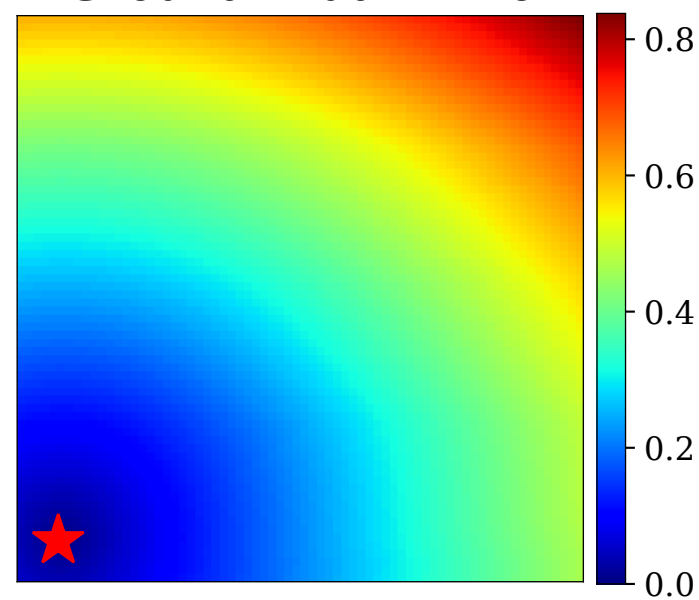

Predicted Time

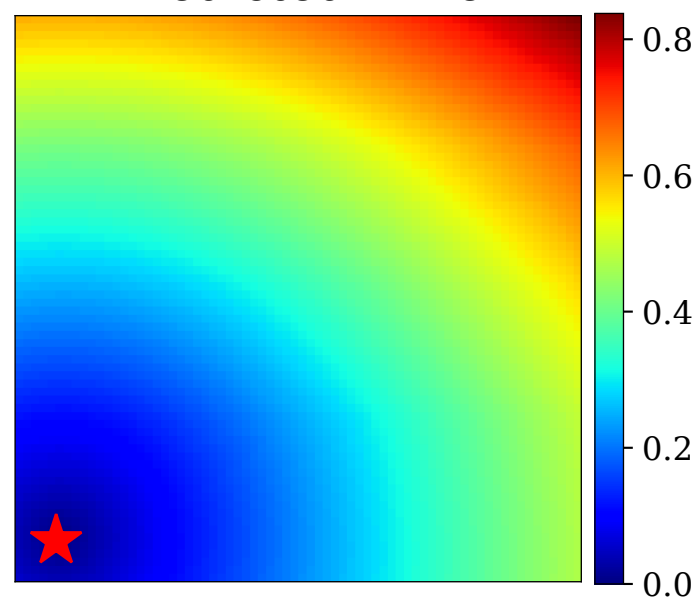

Absolute Error

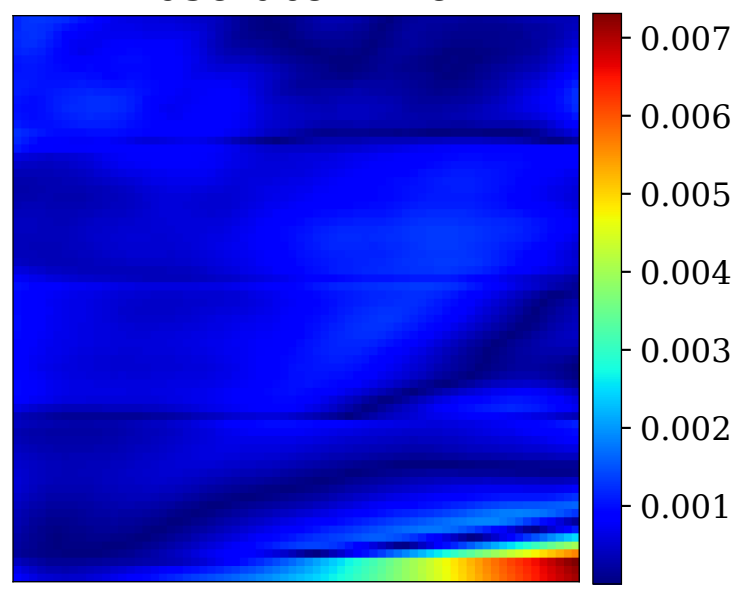

Supplement: supplementary_material [file gt_comp_full_98_(1, 1).pdf › EikonalENF_Jax-clean/experiments/fitting/figures/fwi_flatvel_a/test/gt_comp_full_98_(1, 1).pdf]
