# Supplementary material (part 2 of 2)
Source: ML conference proceedings conference paper supplement (https://openreview.net/forum?id=dK2BnCH68p)

Velocity Field

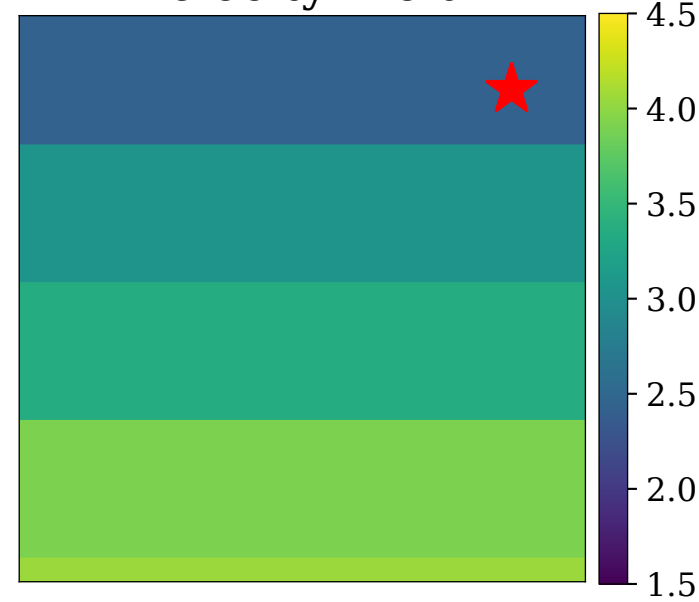

Ground Truth Time

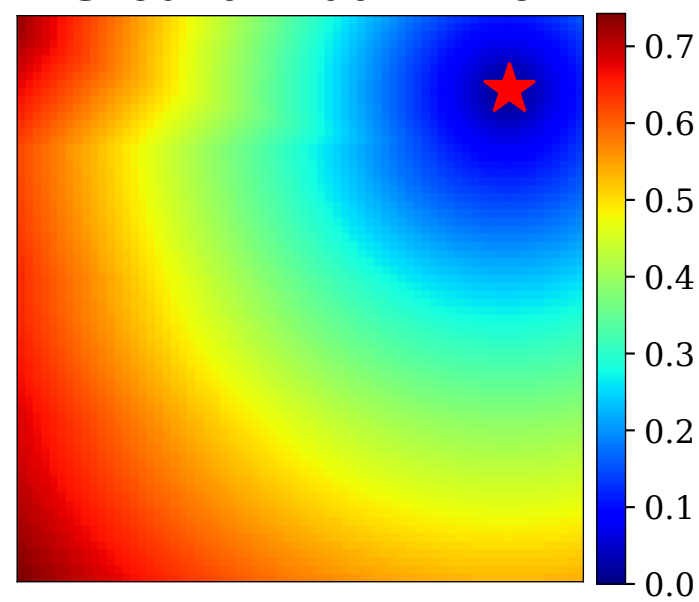

Predicted Time

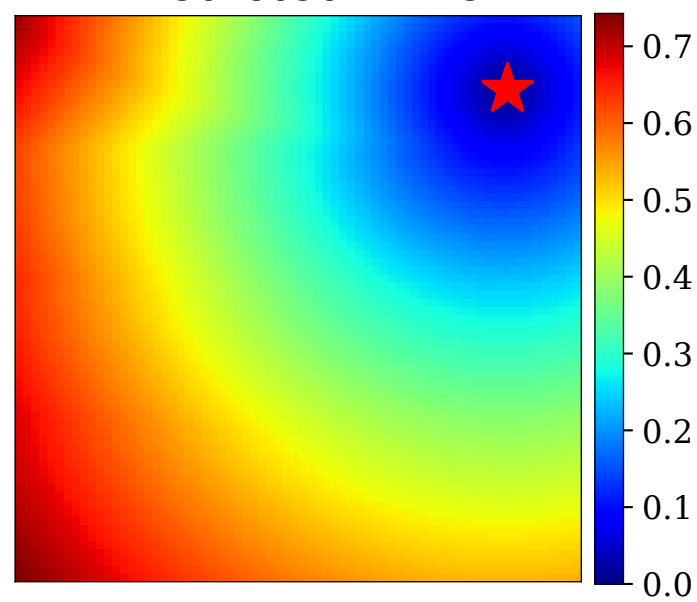

Absolute Error

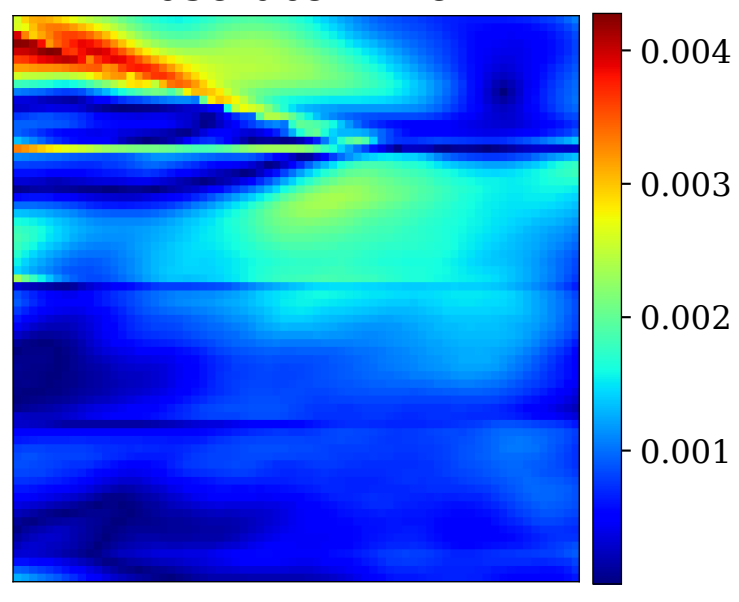

Supplement: supplementary_material [file gt_comp_full_98_(12, 12).pdf › EikonalENF_Jax-clean/experiments/fitting/figures/fwi_flatvel_a/test/gt_comp_full_98_(12, 12).pdf]

Velocity Field

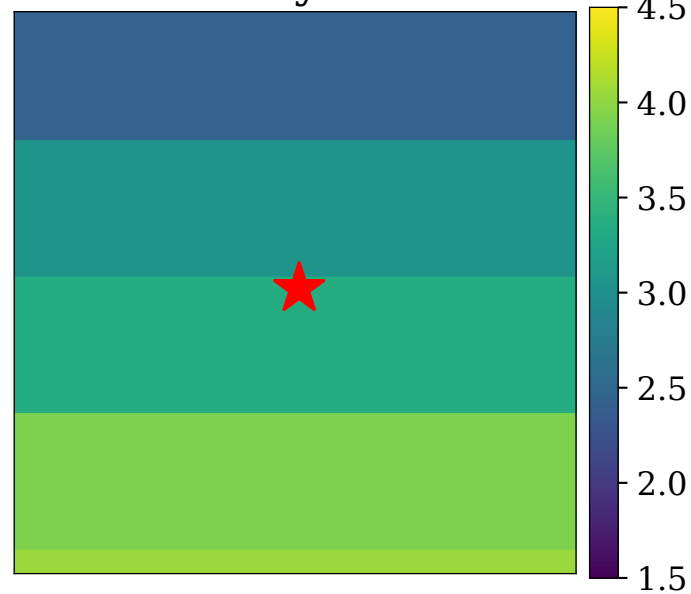

Ground Truth Time

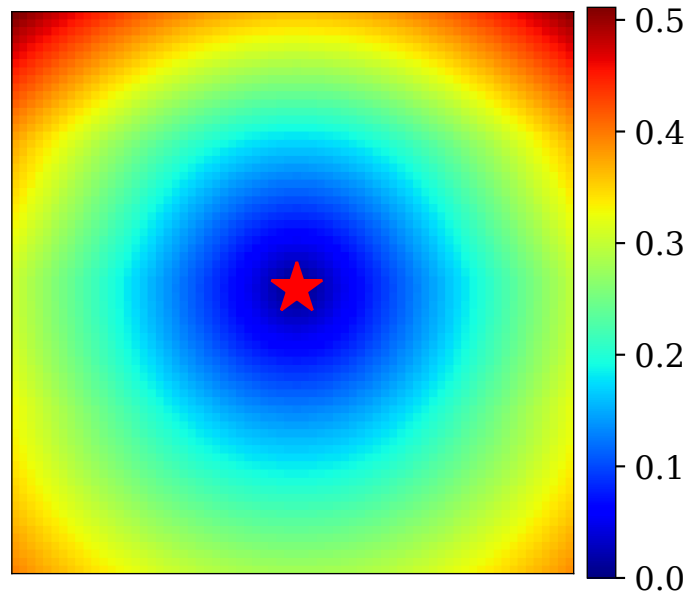

Predicted Time

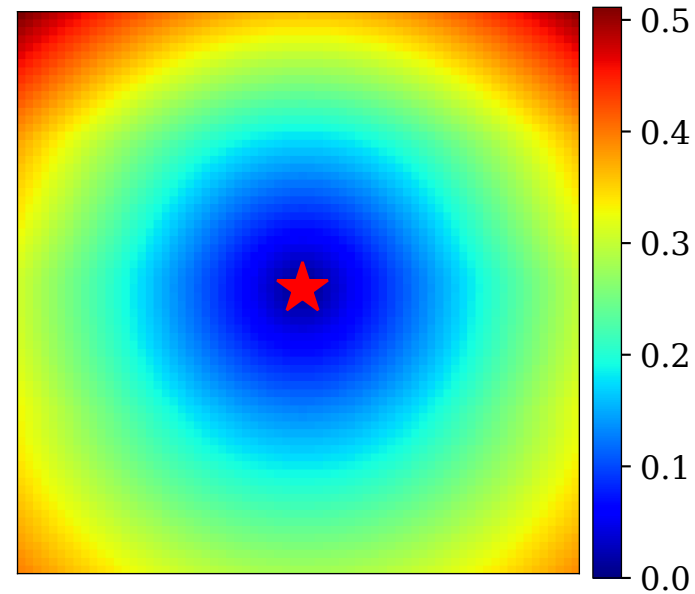

Absolute Error

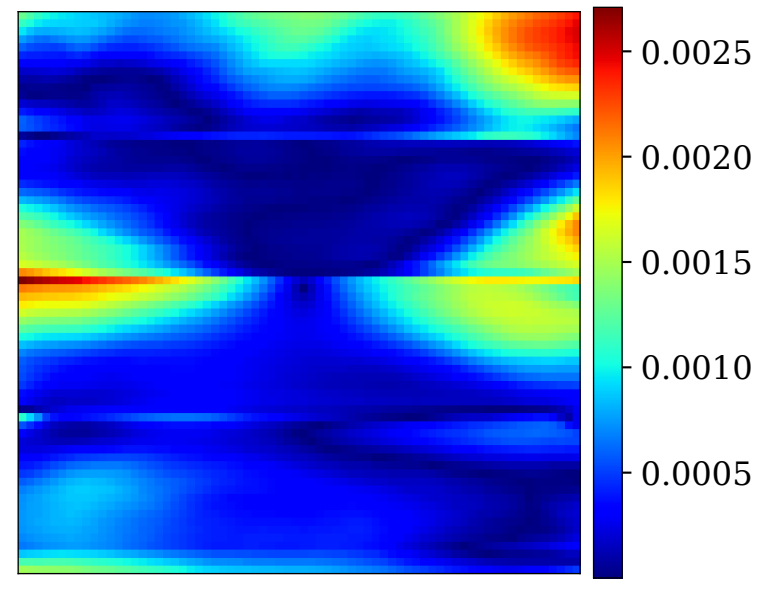

Supplement: supplementary_material [file gt_comp_full_98_(7, 7).pdf › EikonalENF_Jax-clean/experiments/fitting/figures/fwi_flatvel_a/test/gt_comp_full_98_(7, 7).pdf]

Velocity Field

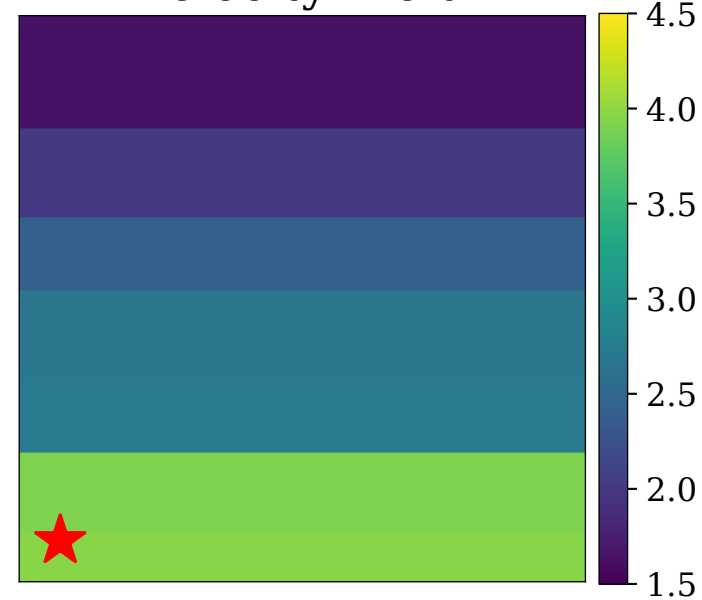

Ground Truth Time

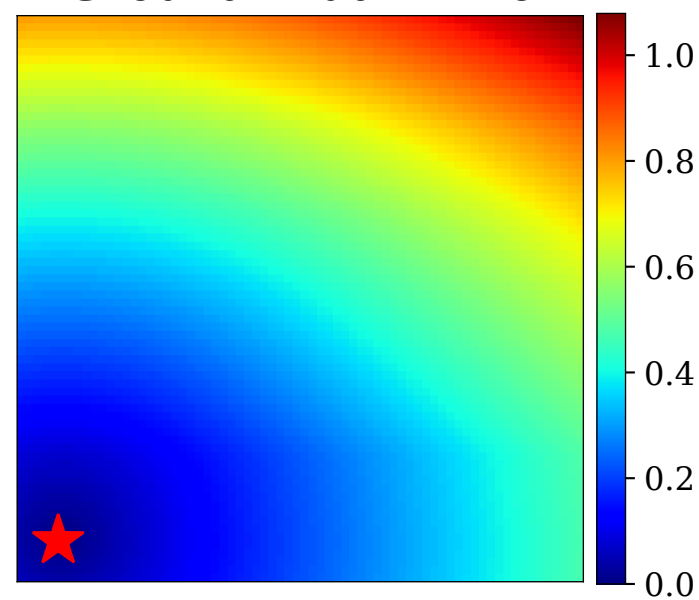

Predicted Time

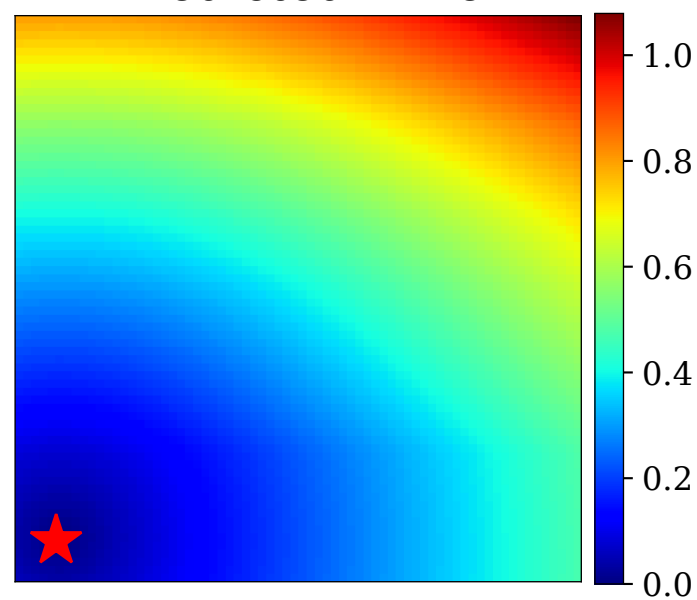

Absolute Error

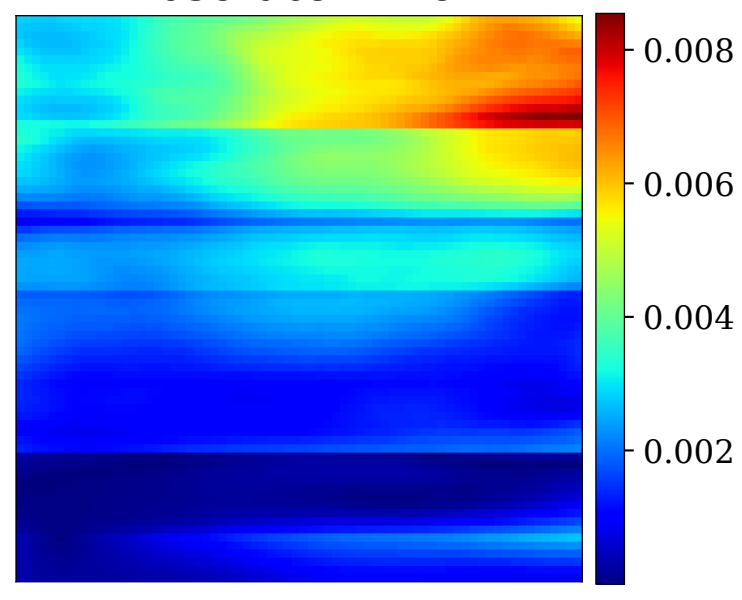

Supplement: supplementary_material [file gt_comp_full_99_(1, 1).pdf › EikonalENF_Jax-clean/experiments/fitting/figures/fwi_flatvel_a/test/gt_comp_full_99_(1, 1).pdf]

Velocity Field

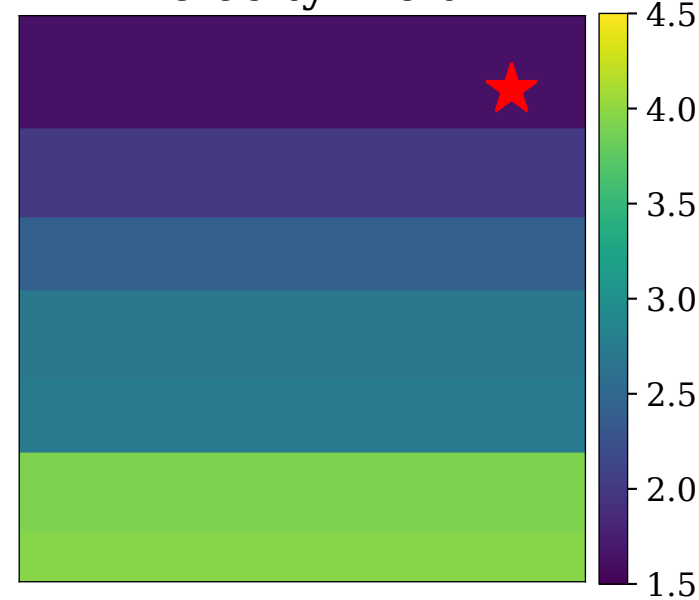

Ground Truth Time

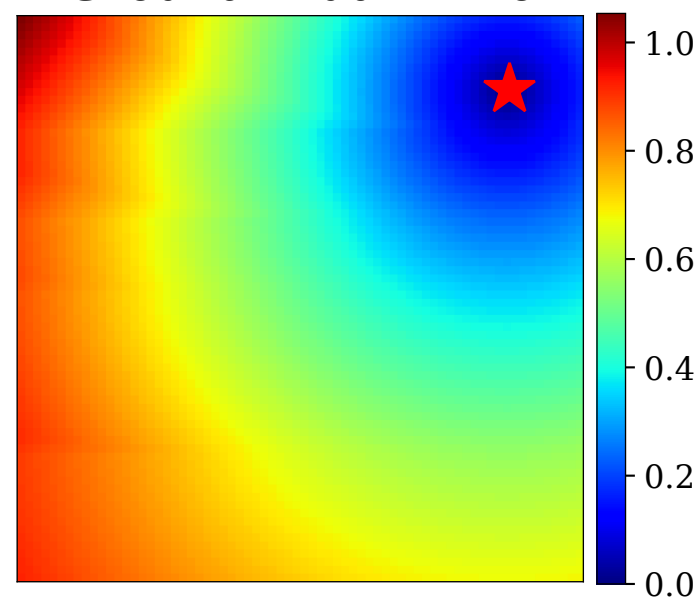

Predicted Time

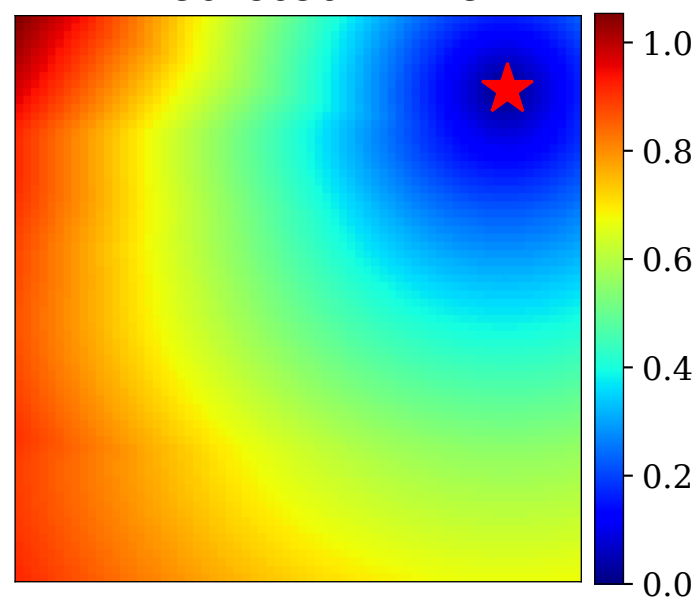

Absolute Error

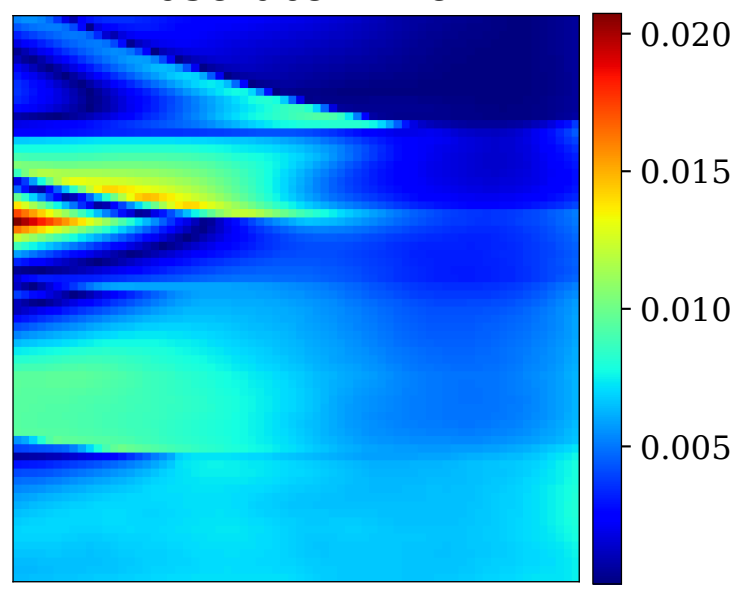

Supplement: supplementary_material [file gt_comp_full_99_(12, 12).pdf › EikonalENF_Jax-clean/experiments/fitting/figures/fwi_flatvel_a/test/gt_comp_full_99_(12, 12).pdf]

Velocity Field

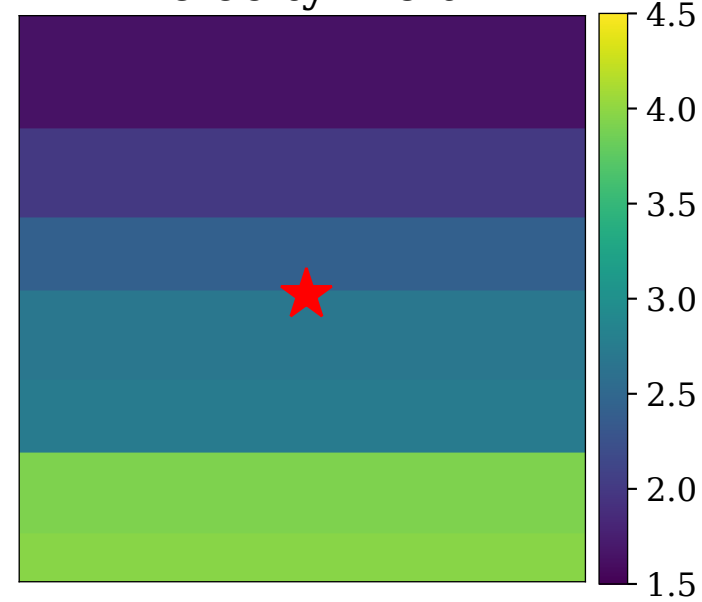

Ground Truth Time

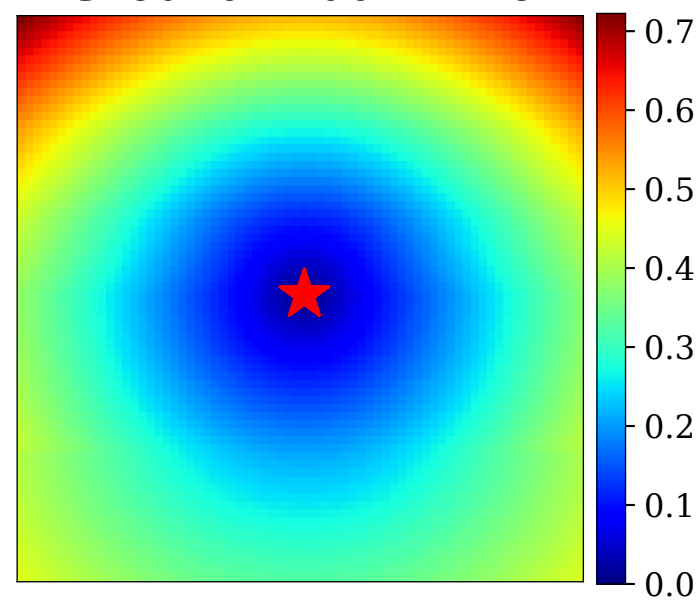

Predicted Time

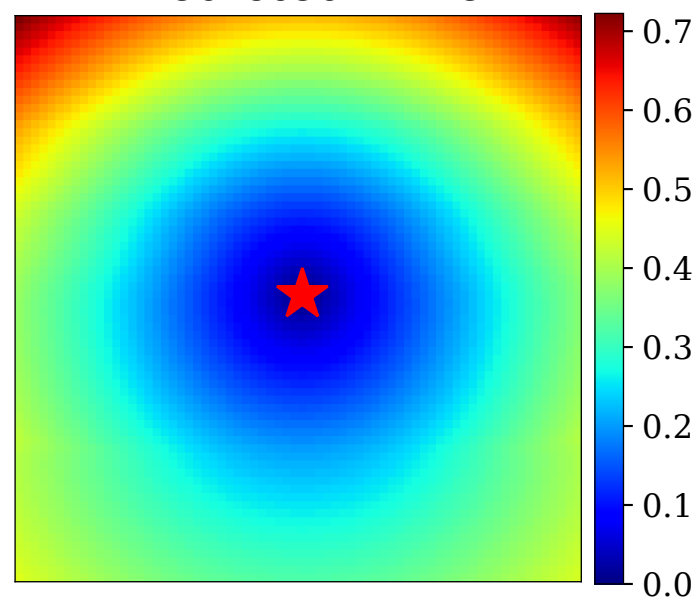

Absolute Error

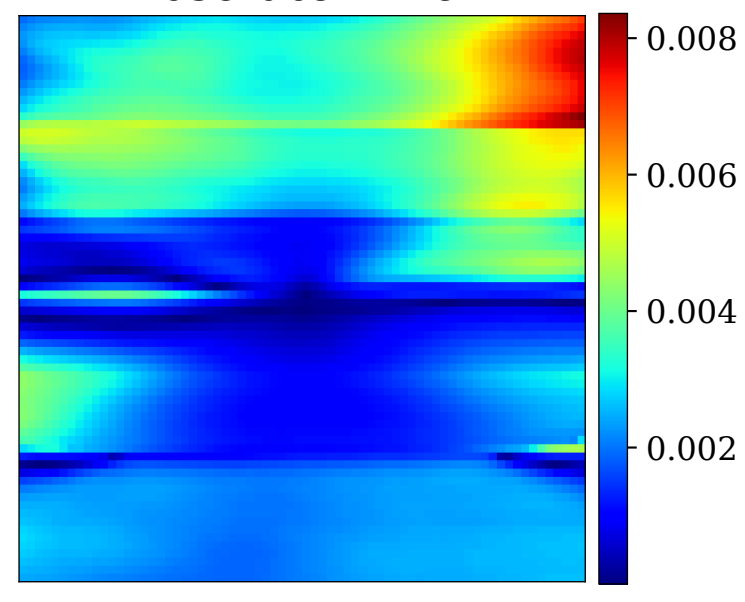

Supplement: supplementary_material [file gt_comp_full_99_(7, 7).pdf › EikonalENF_Jax-clean/experiments/fitting/figures/fwi_flatvel_a/test/gt_comp_full_99_(7, 7).pdf]

Velocity Field

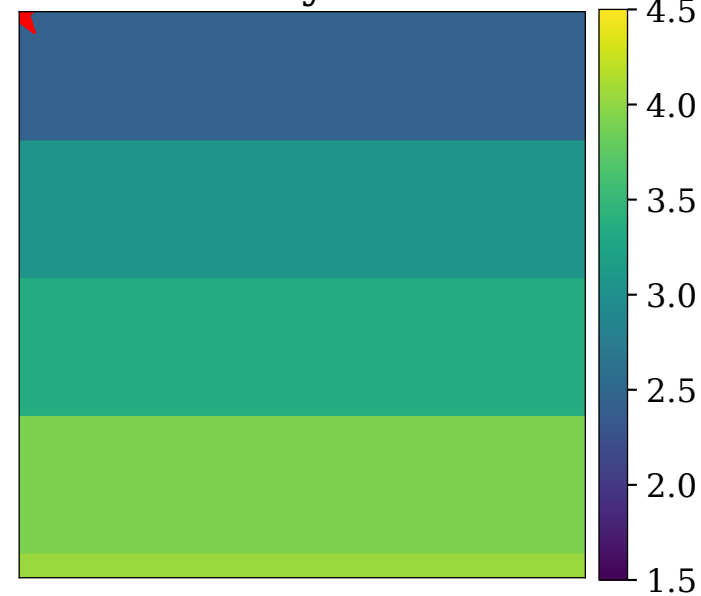

Ground Truth Time

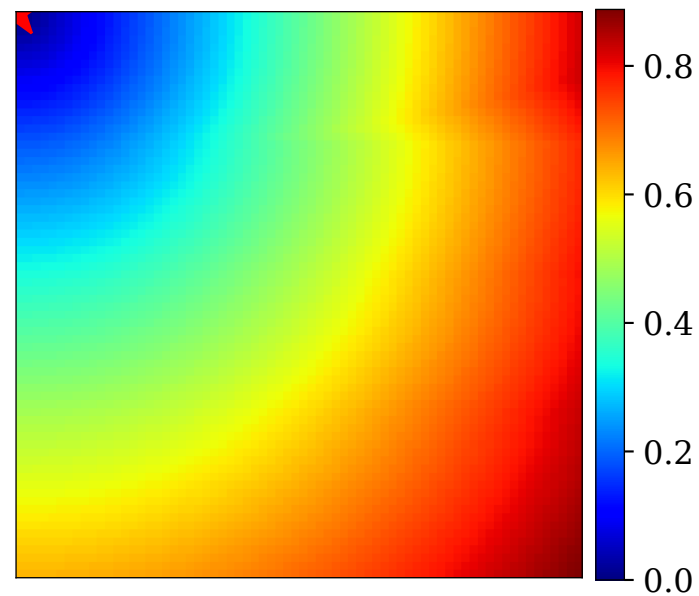

Predicted Time

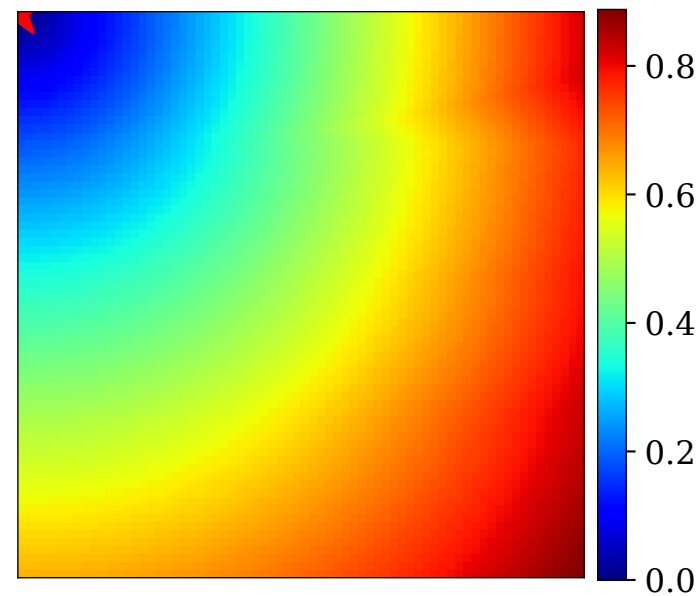

Absolute Error

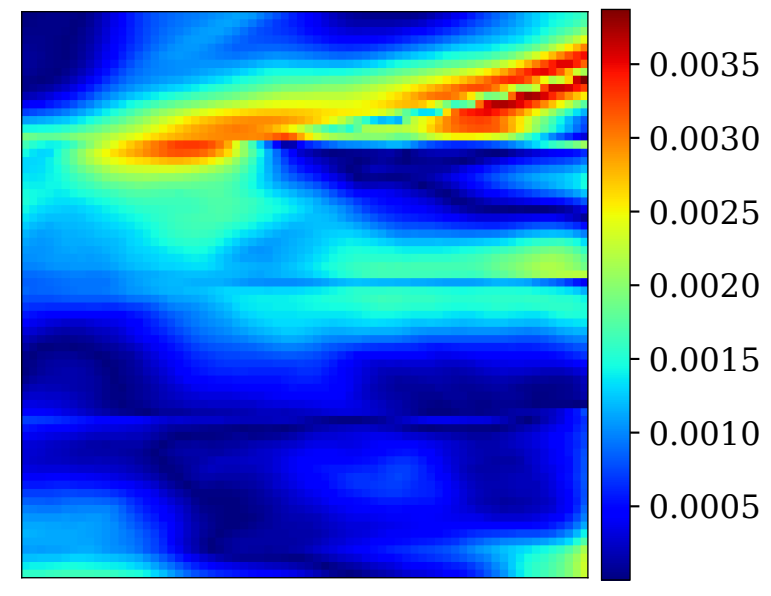

Supplement: supplementary_material [file gt_comp_top_98_(0, 0).pdf › EikonalENF_Jax-clean/experiments/fitting/figures/fwi_flatvel_a/test/gt_comp_top_98_(0, 0).pdf]

Velocity Field

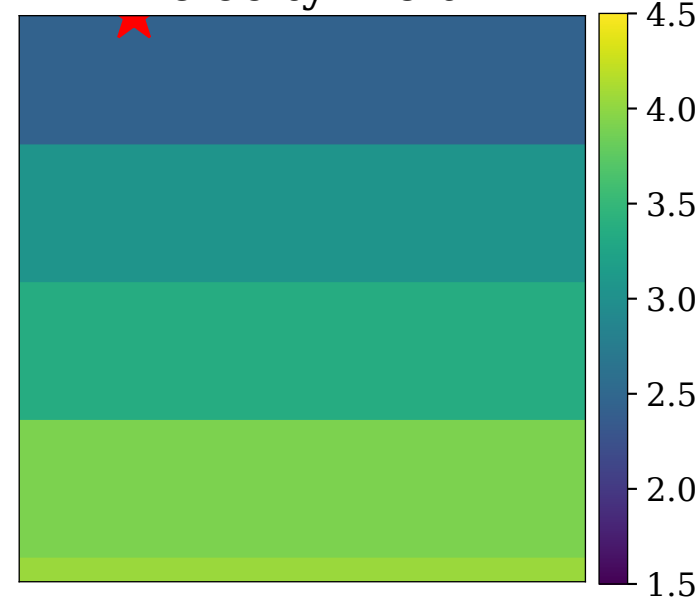

Ground Truth Time

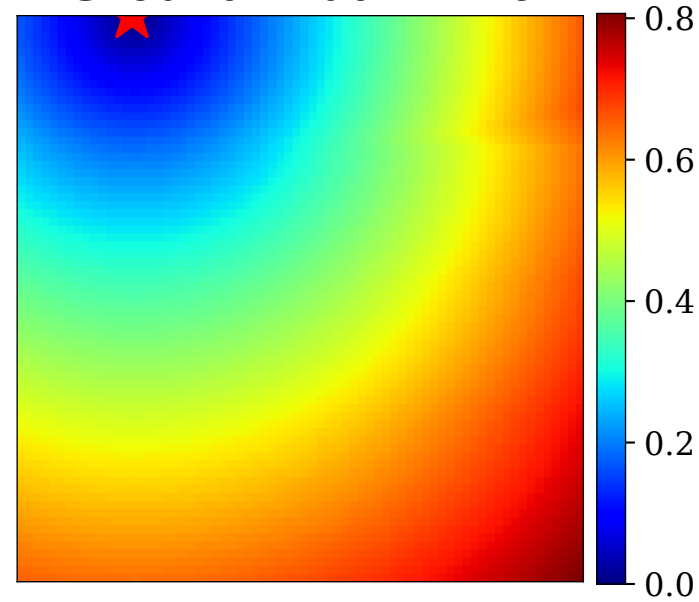

Predicted Time

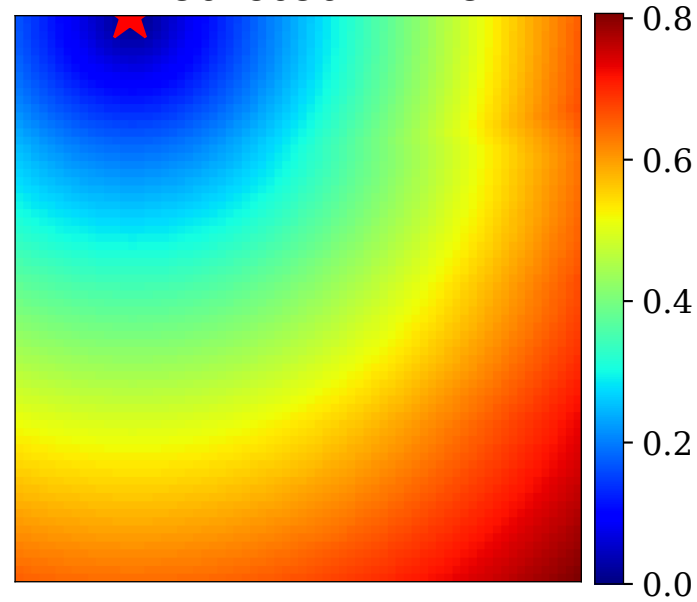

Absolute Error

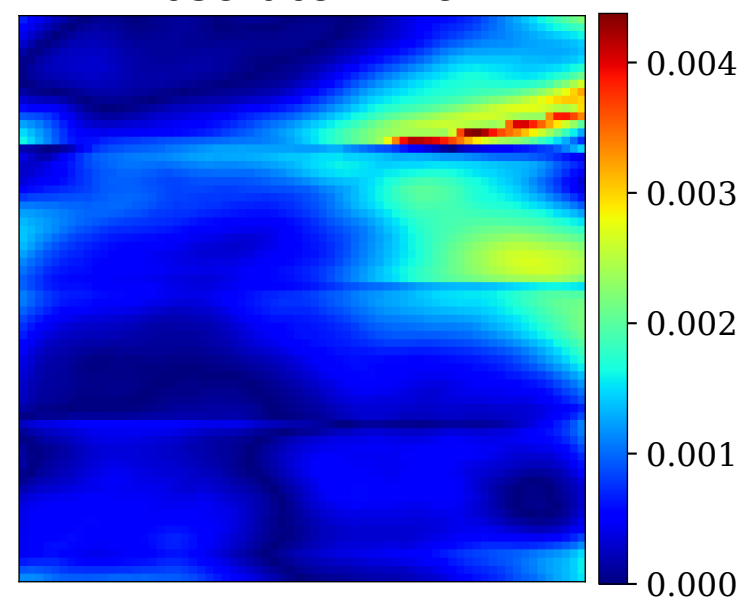

Supplement: supplementary_material [file gt_comp_top_98_(1, 0).pdf › EikonalENF_Jax-clean/experiments/fitting/figures/fwi_flatvel_a/test/gt_comp_top_98_(1, 0).pdf]

Velocity Field

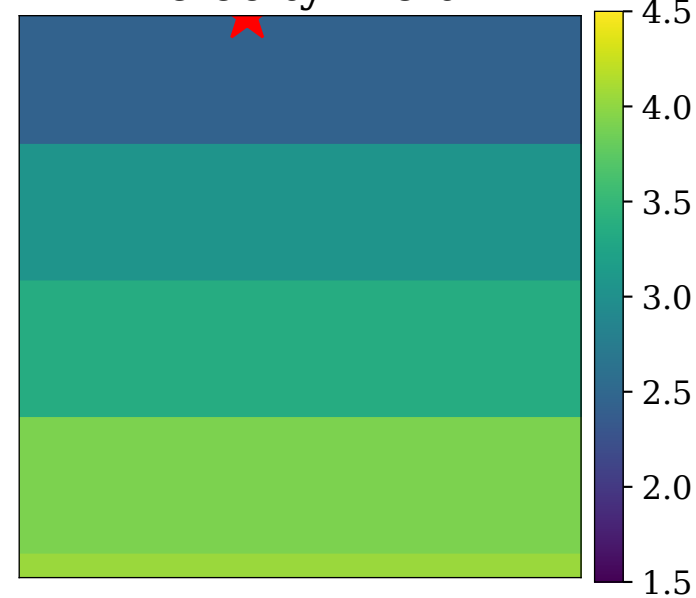

Ground Truth Time

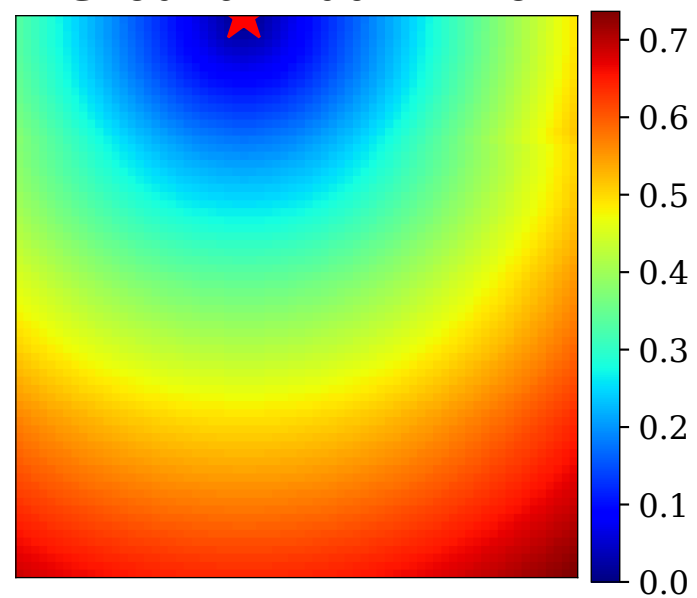

Predicted Time

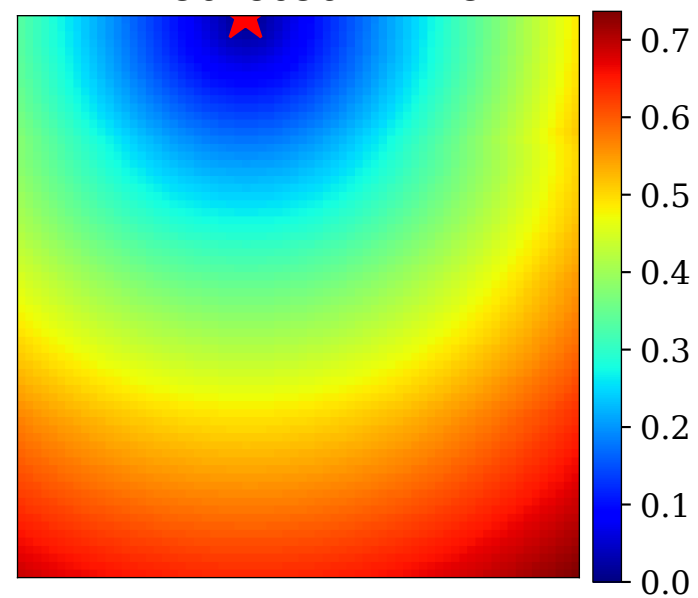

Absolute Error

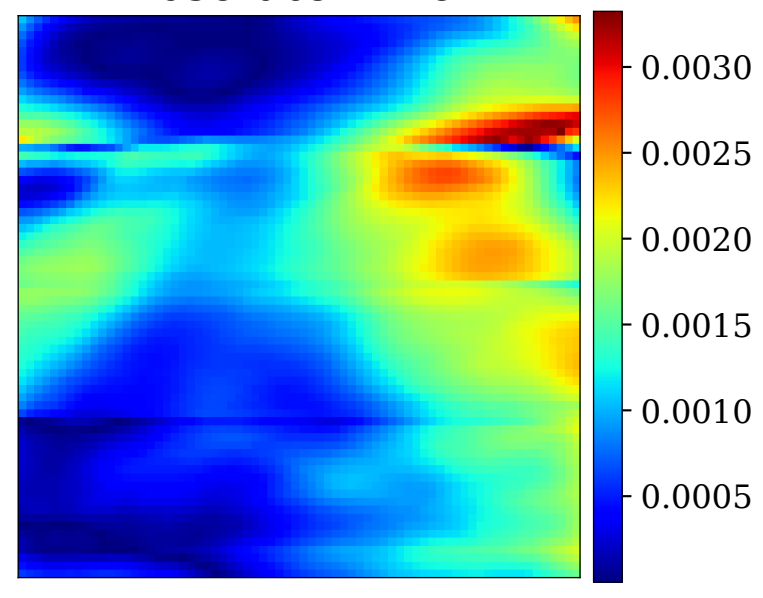

Supplement: supplementary_material [file gt_comp_top_98_(2, 0).pdf › EikonalENF_Jax-clean/experiments/fitting/figures/fwi_flatvel_a/test/gt_comp_top_98_(2, 0).pdf]

Velocity Field

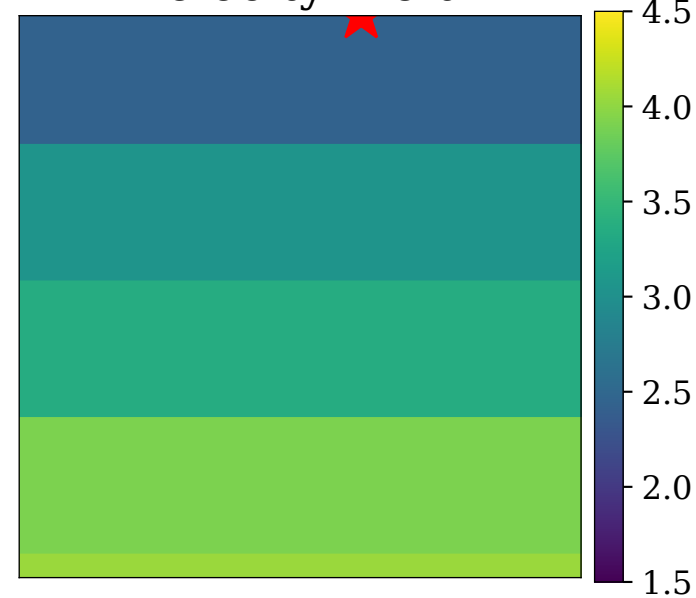

Ground Truth Time

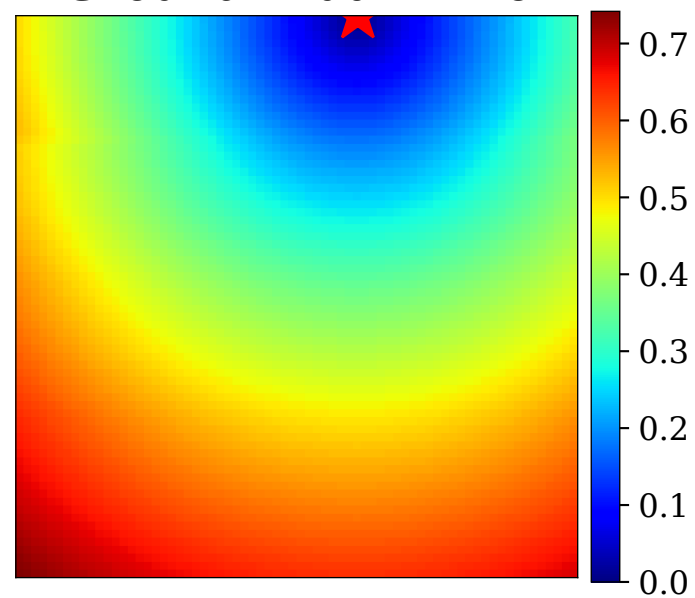

Predicted Time

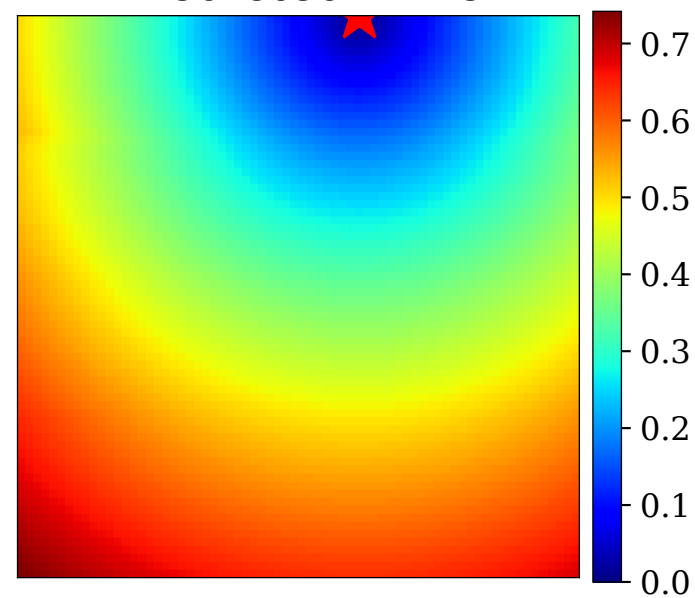

Absolute Error

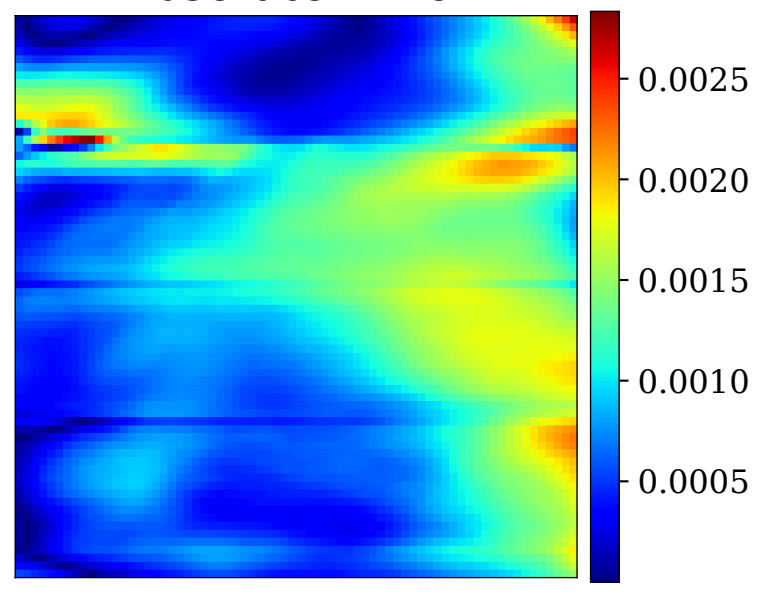

Supplement: supplementary_material [file gt_comp_top_98_(3, 0).pdf › EikonalENF_Jax-clean/experiments/fitting/figures/fwi_flatvel_a/test/gt_comp_top_98_(3, 0).pdf]

Velocity Field

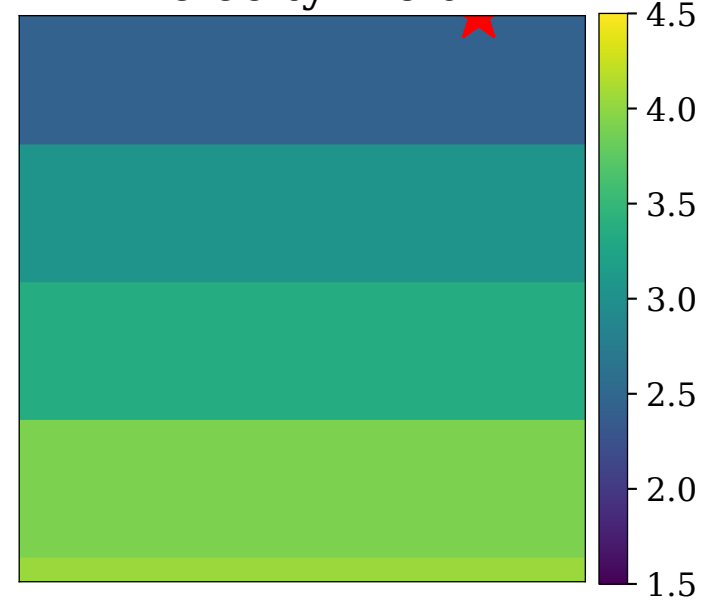

Ground Truth Time

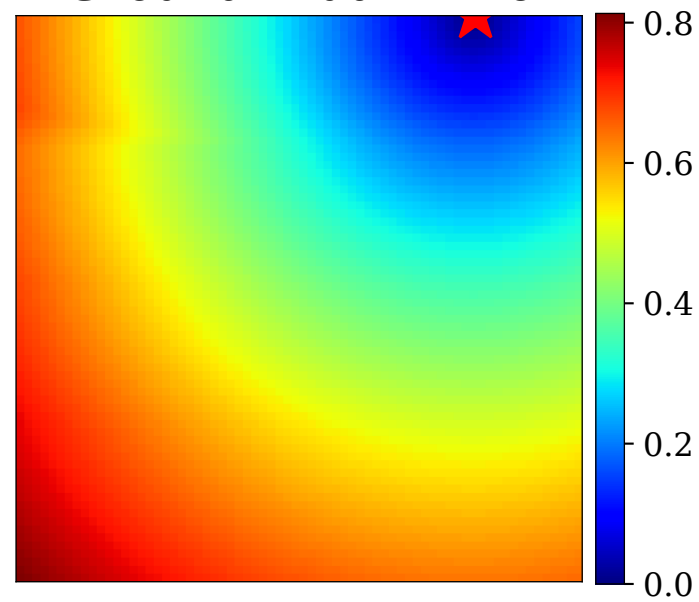

Predicted Time

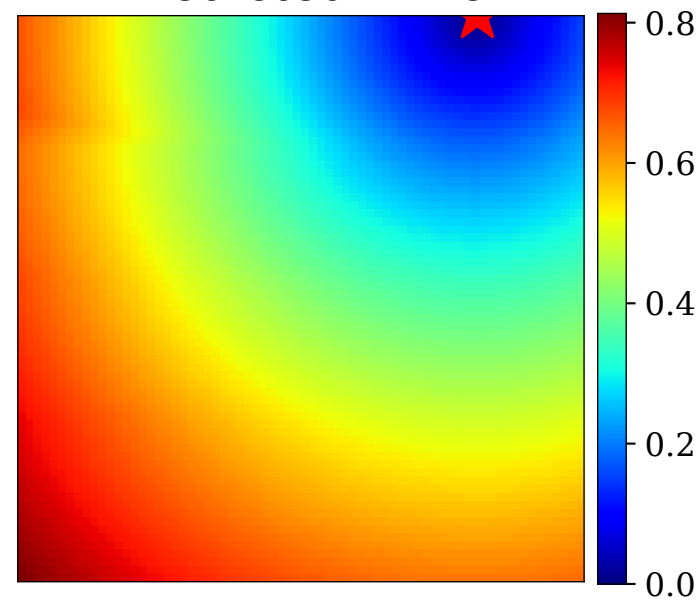

Absolute Error

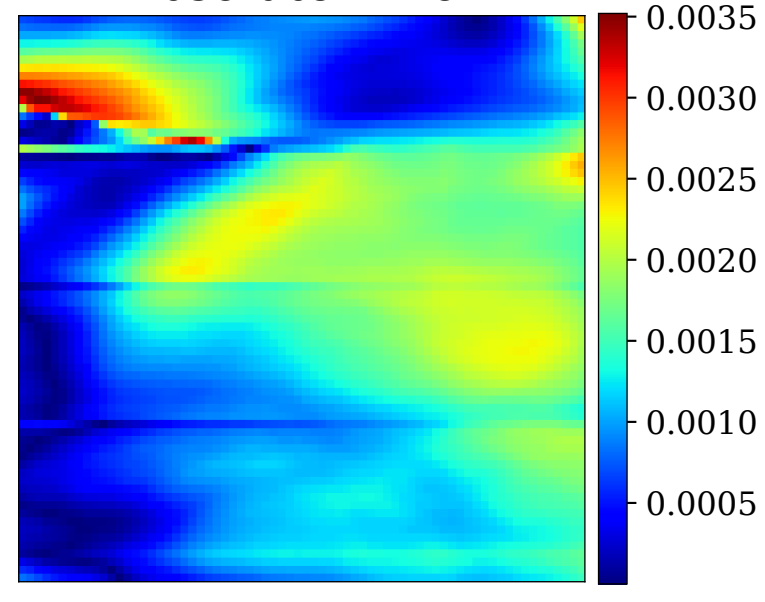

Supplement: supplementary_material [file gt_comp_top_98_(4, 0).pdf › EikonalENF_Jax-clean/experiments/fitting/figures/fwi_flatvel_a/test/gt_comp_top_98_(4, 0).pdf]

Velocity Field

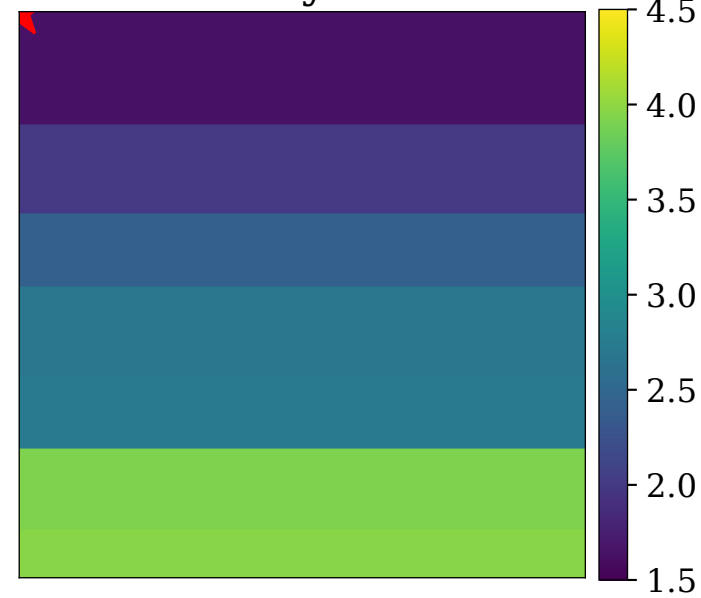

Ground Truth Time

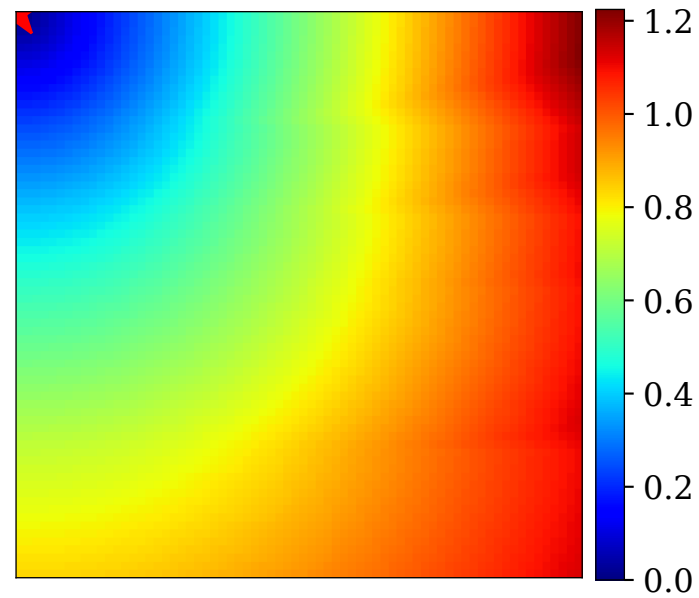

Predicted Time

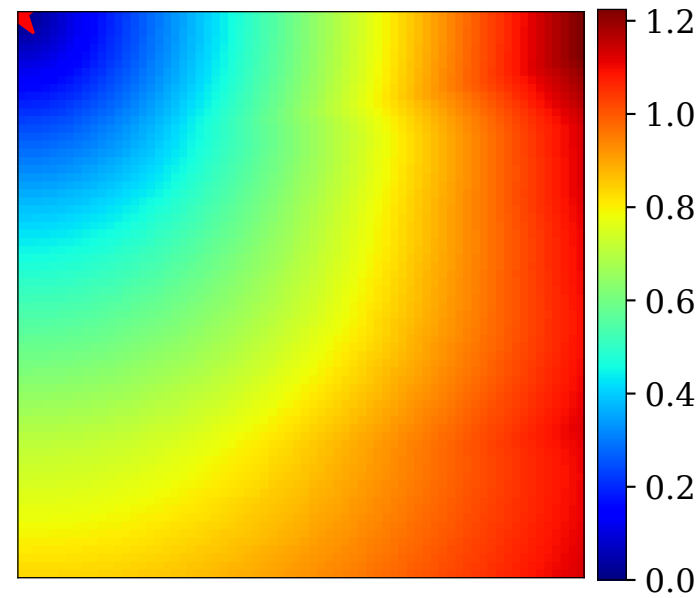

Absolute Error

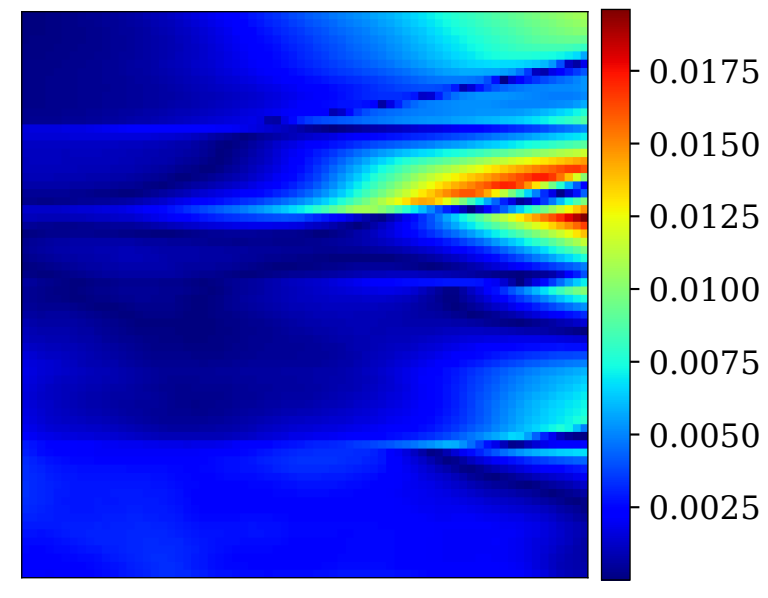

Supplement: supplementary_material [file gt_comp_top_99_(0, 0).pdf › EikonalENF_Jax-clean/experiments/fitting/figures/fwi_flatvel_a/test/gt_comp_top_99_(0, 0).pdf]

Velocity Field

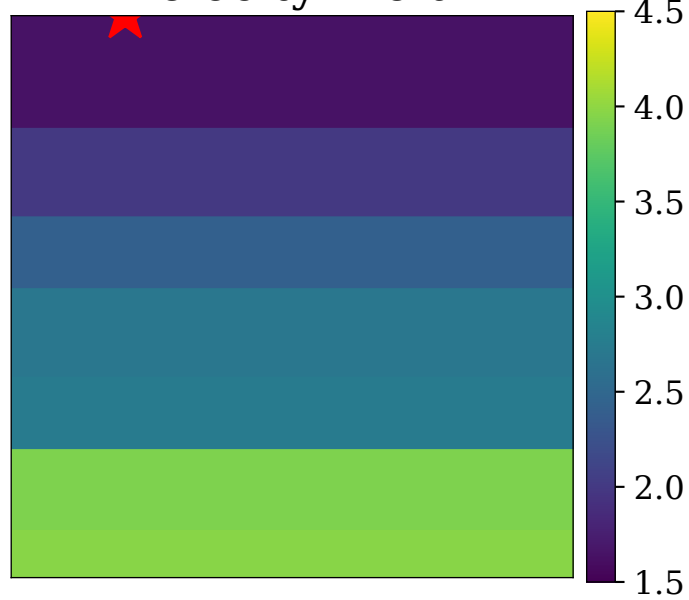

Ground Truth Time

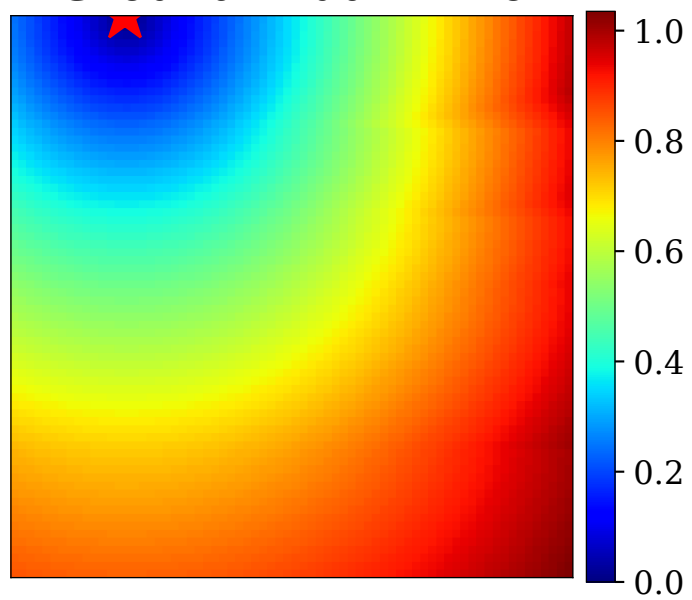

Predicted Time

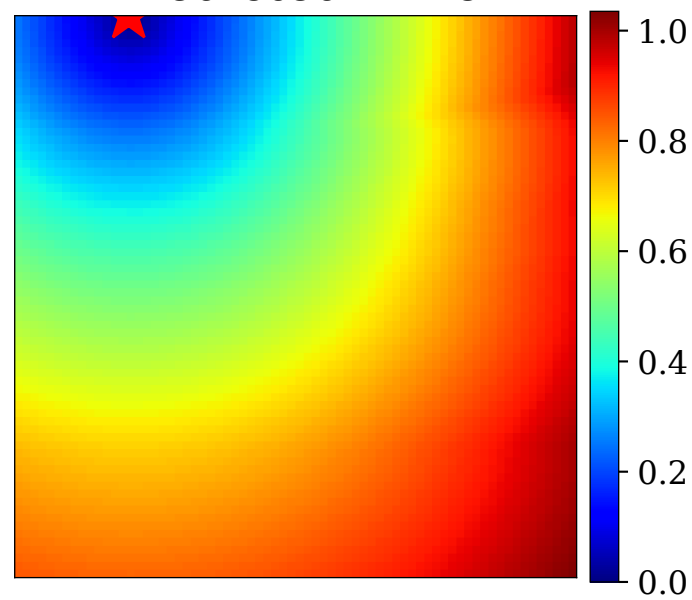

Absolute Error

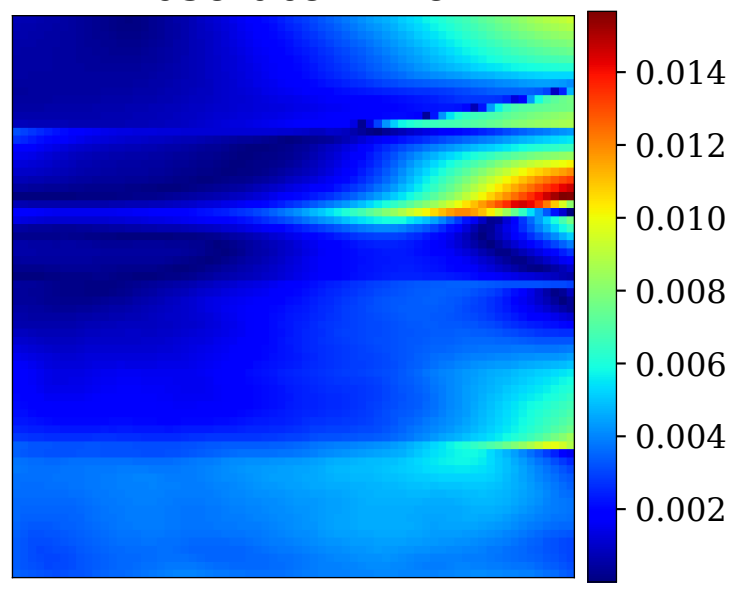

Supplement: supplementary_material [file gt_comp_top_99_(1, 0).pdf › EikonalENF_Jax-clean/experiments/fitting/figures/fwi_flatvel_a/test/gt_comp_top_99_(1, 0).pdf]

Velocity Field

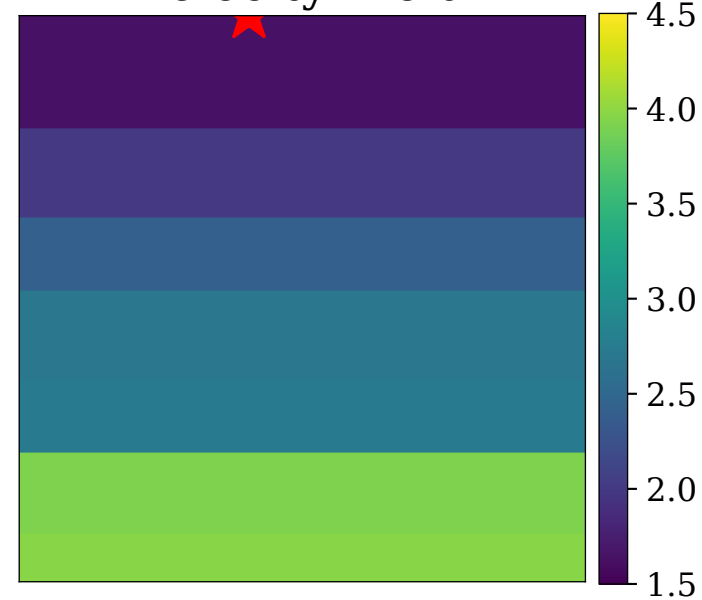

Ground Truth Time

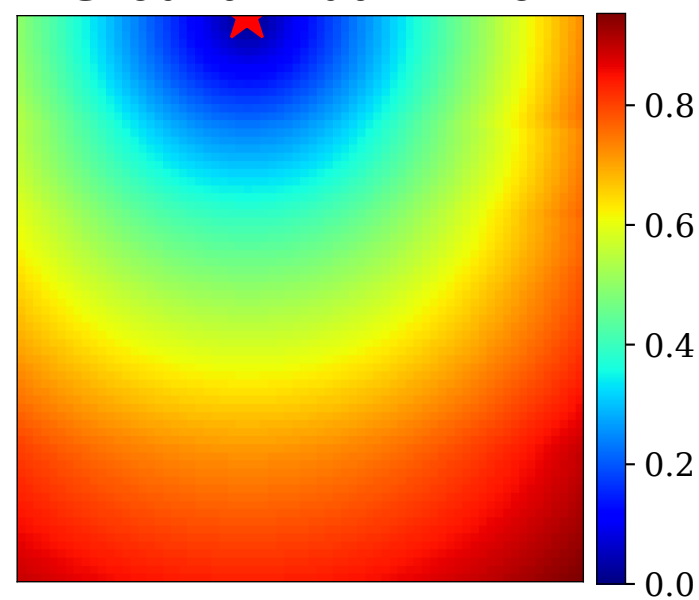

Predicted Time

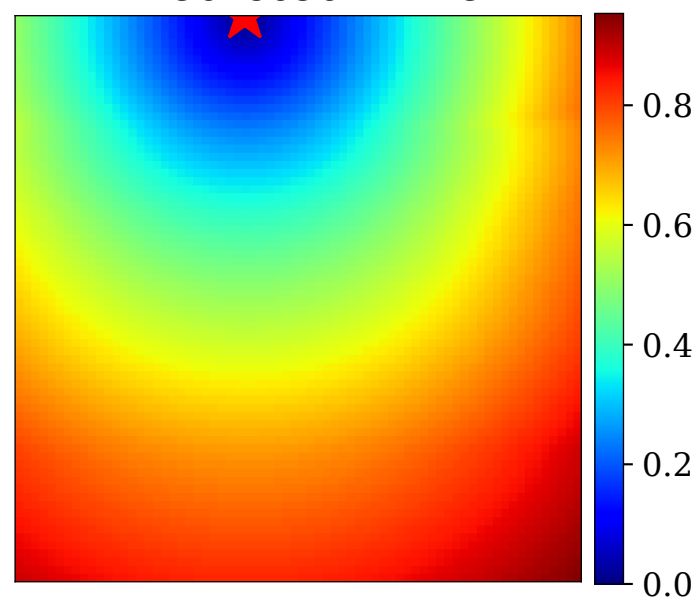

Absolute Error

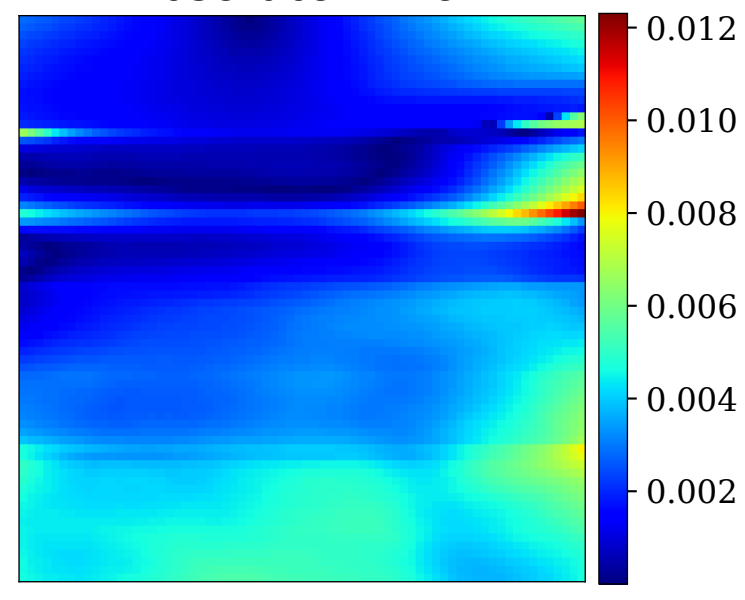

Supplement: supplementary_material [file gt_comp_top_99_(2, 0).pdf › EikonalENF_Jax-clean/experiments/fitting/figures/fwi_flatvel_a/test/gt_comp_top_99_(2, 0).pdf]

Velocity Field

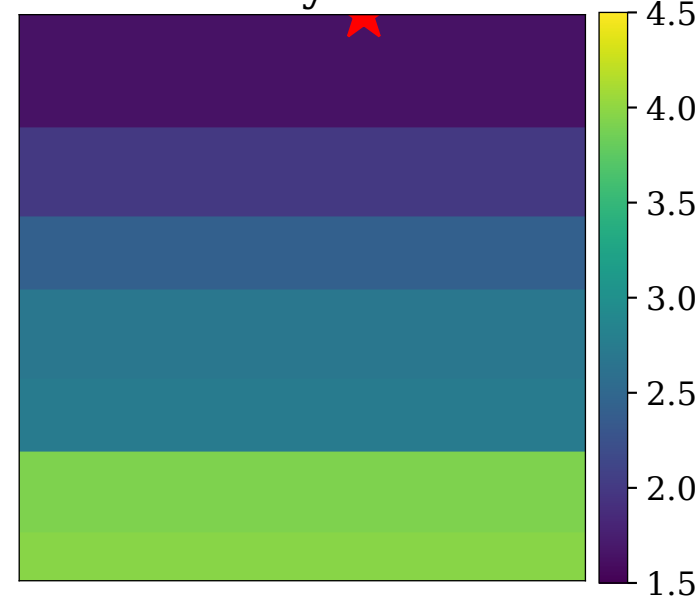

Ground Truth Time

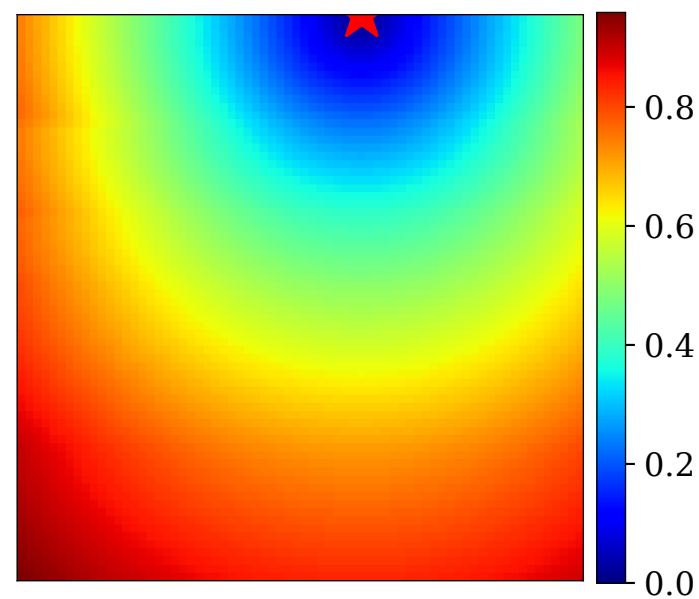

Predicted Time

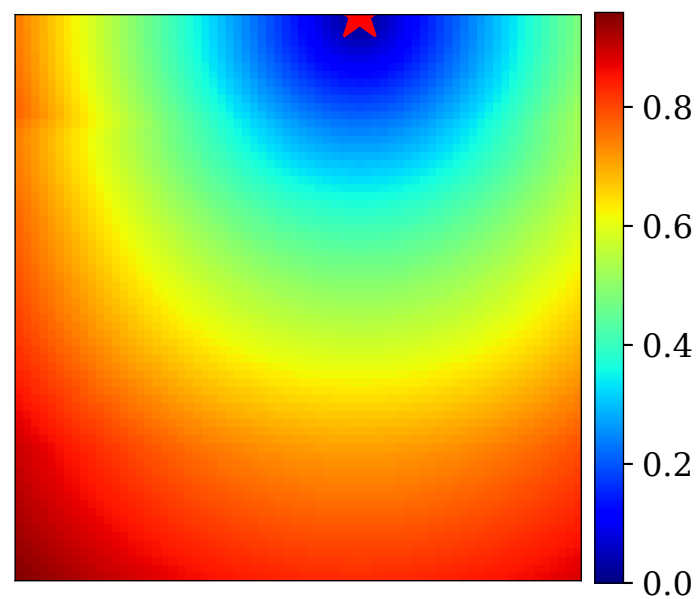

Absolute Error

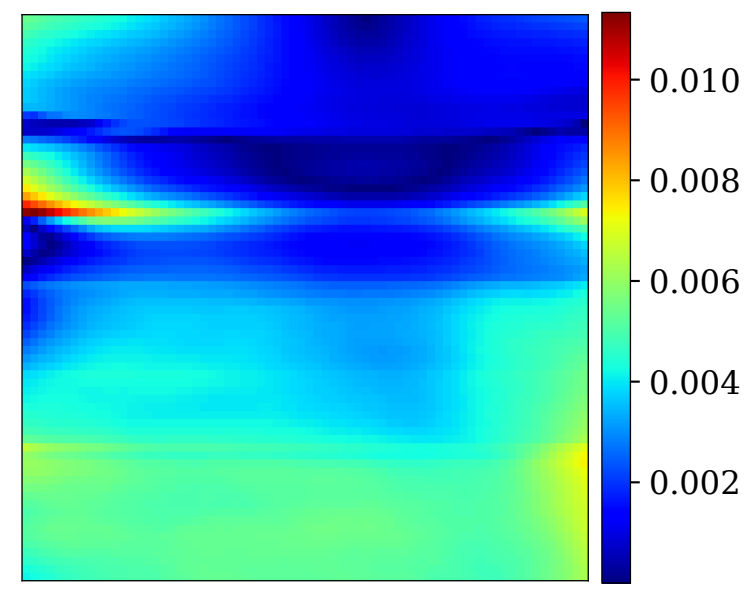

Supplement: supplementary_material [file gt_comp_top_99_(3, 0).pdf › EikonalENF_Jax-clean/experiments/fitting/figures/fwi_flatvel_a/test/gt_comp_top_99_(3, 0).pdf]

Velocity Field

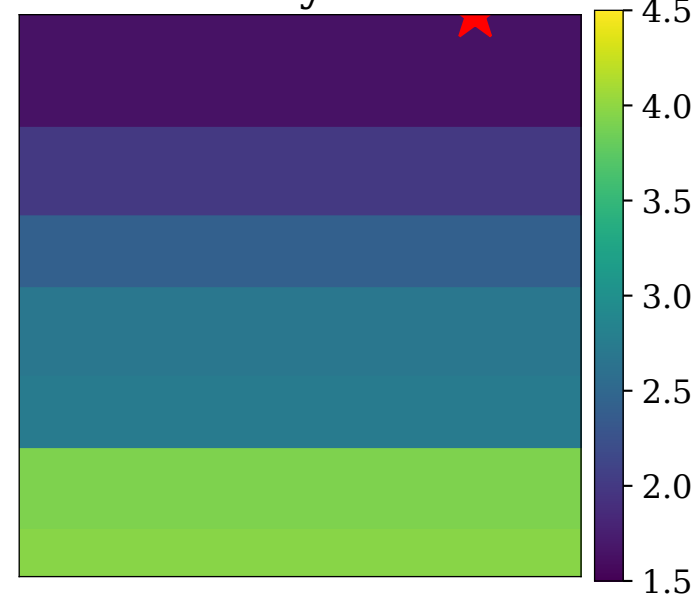

Ground Truth Time

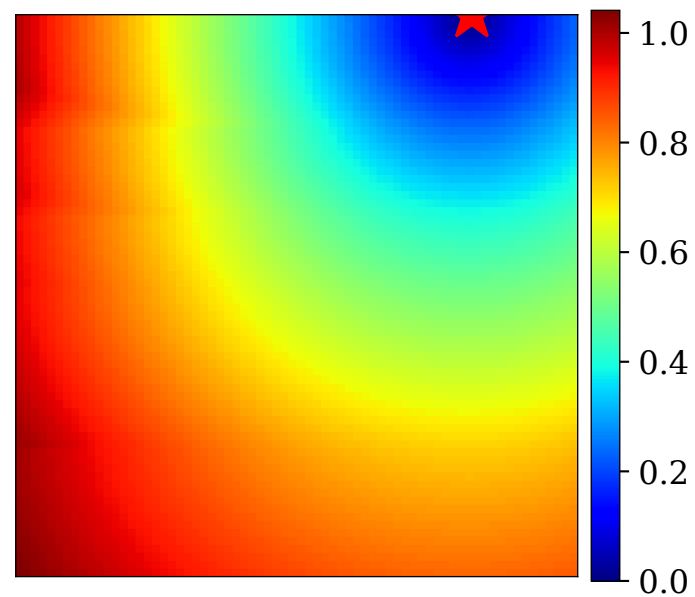

Predicted Time

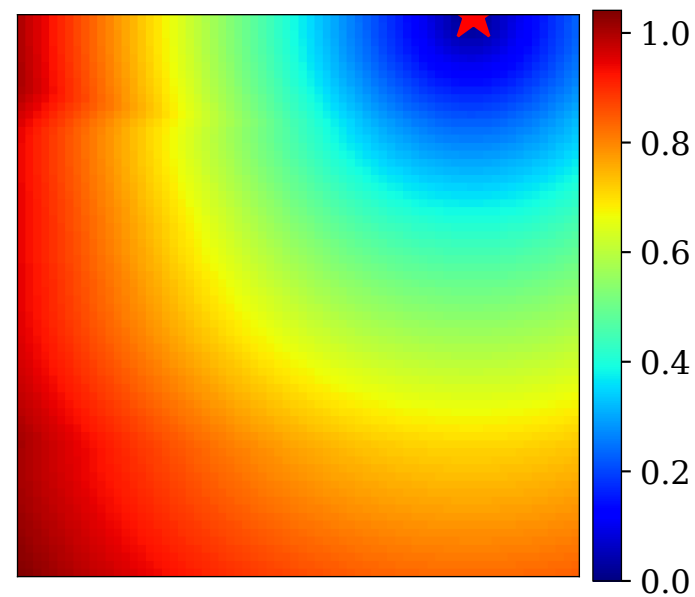

Absolute Error

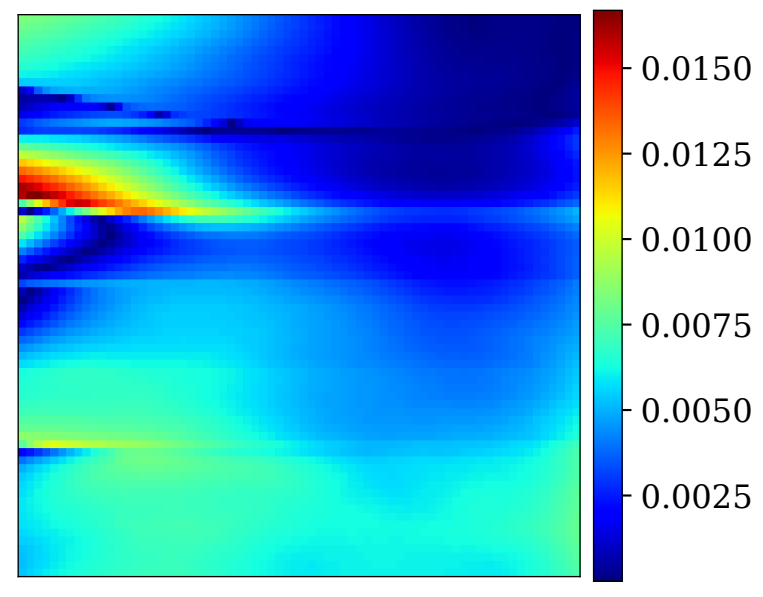

Supplement: supplementary_material [file gt_comp_top_99_(4, 0).pdf › EikonalENF_Jax-clean/experiments/fitting/figures/fwi_flatvel_a/test/gt_comp_top_99_(4, 0).pdf]

Velocity Field

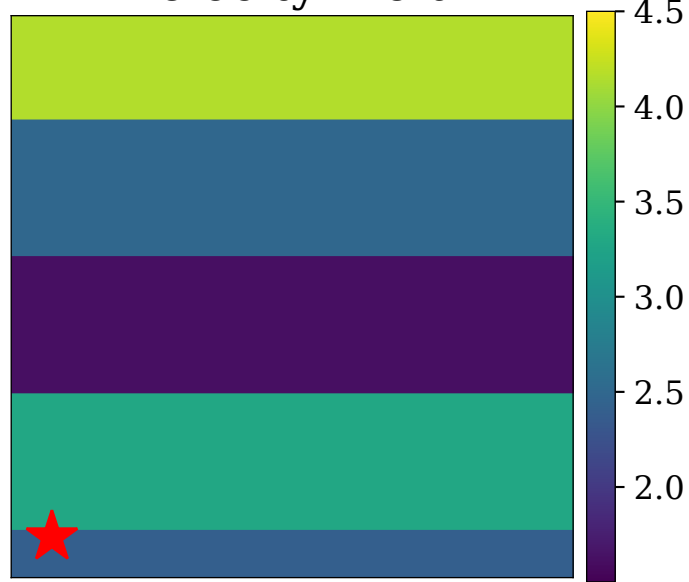

Ground Truth Time

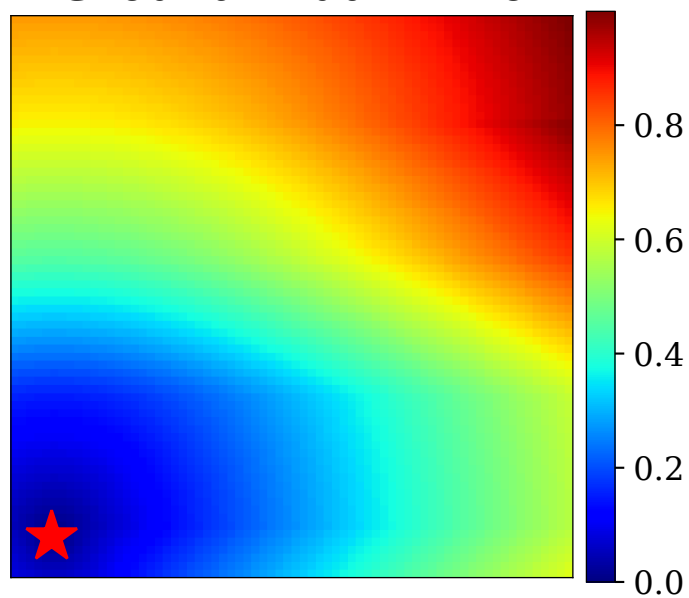

Predicted Time

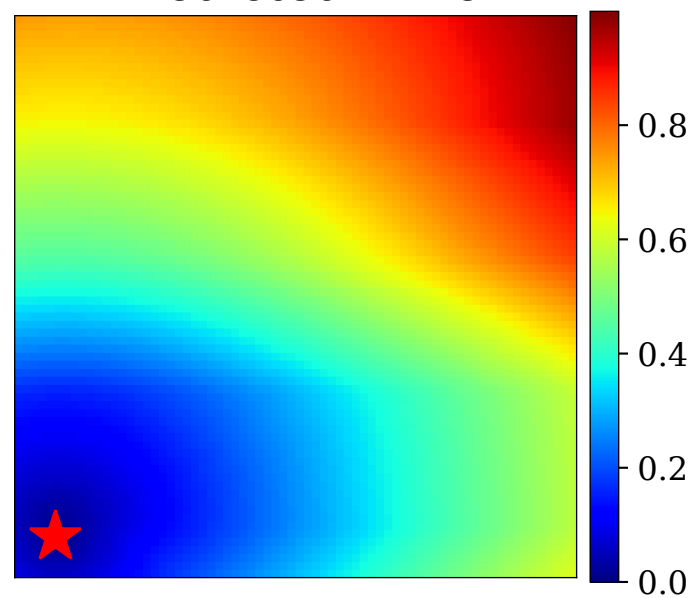

Absolute Error

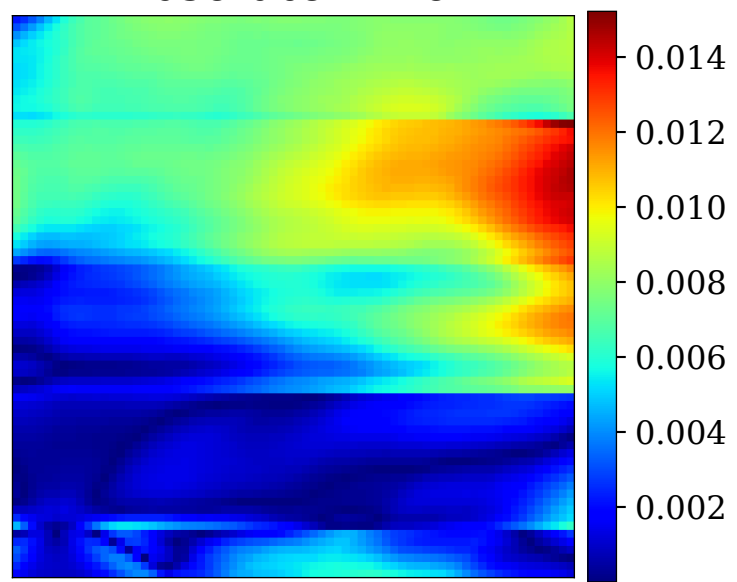

Supplement: supplementary_material [file gt_comp_full_98_(1, 1).pdf › EikonalENF_Jax-clean/experiments/fitting/figures/fwi_flatvel_b/test/gt_comp_full_98_(1, 1).pdf]

Velocity Field

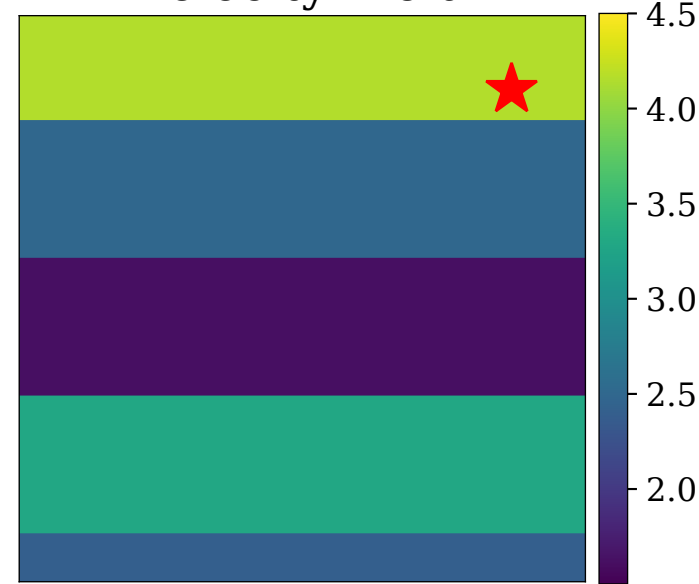

Ground Truth Time

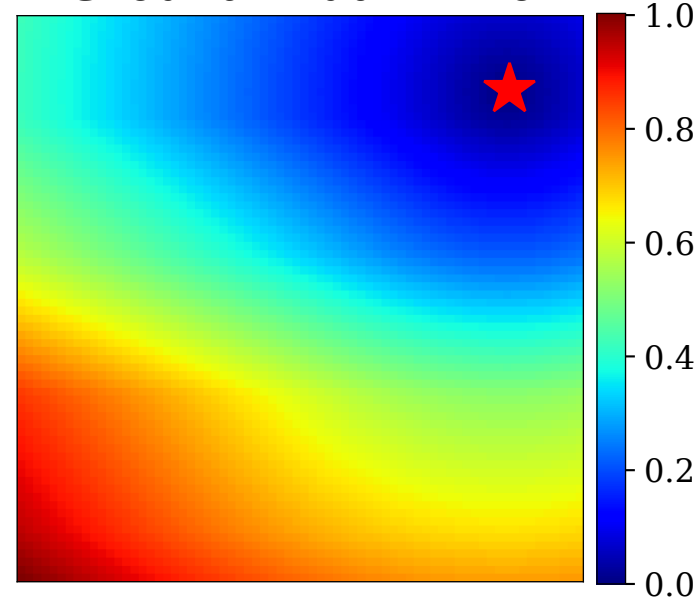

Predicted Time

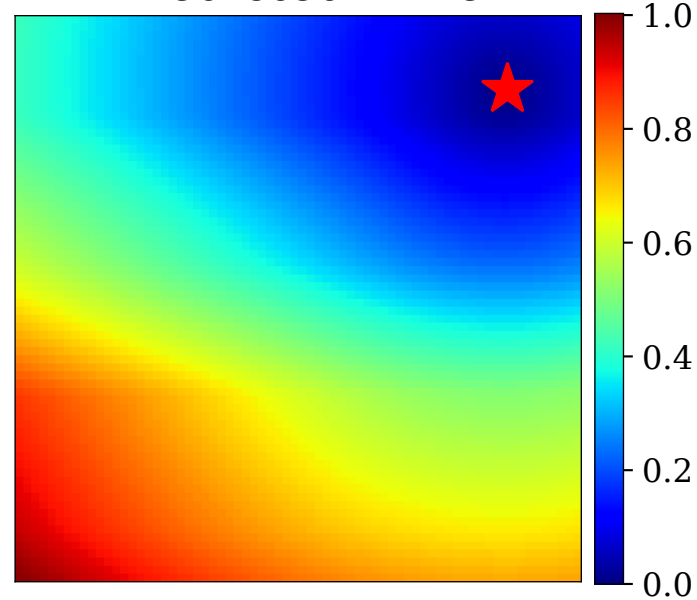

Absolute Error

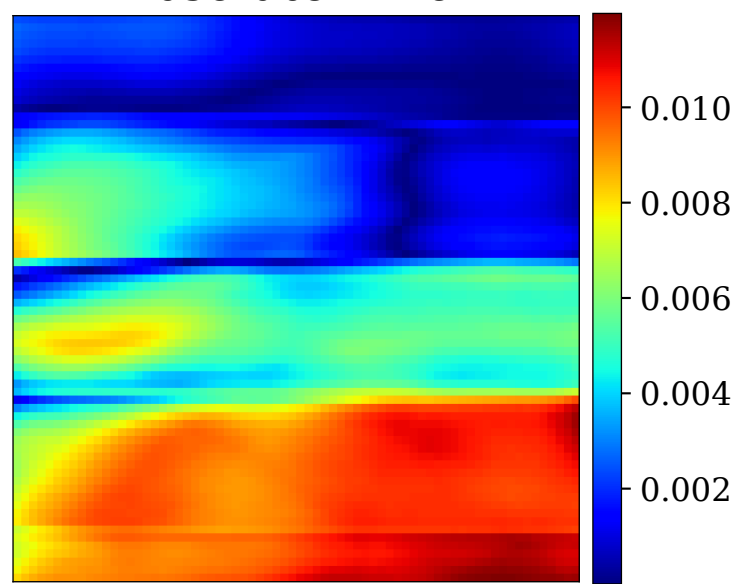

Supplement: supplementary_material [file gt_comp_full_98_(12, 12).pdf › EikonalENF_Jax-clean/experiments/fitting/figures/fwi_flatvel_b/test/gt_comp_full_98_(12, 12).pdf]

Velocity Field

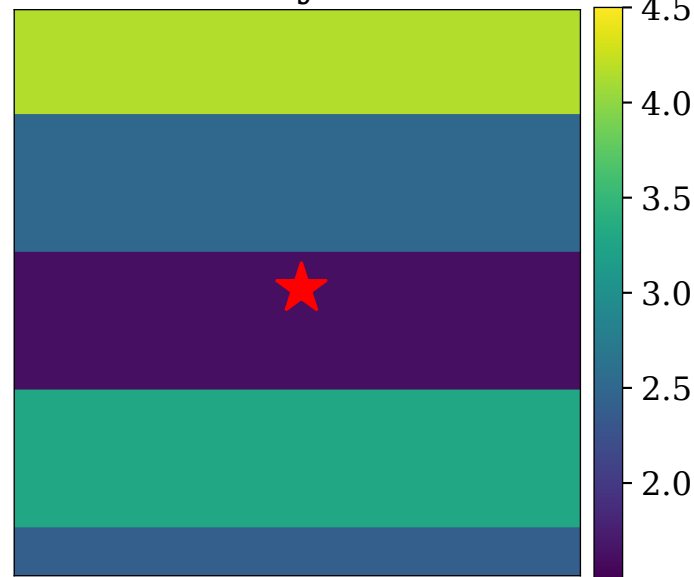

Ground Truth Time

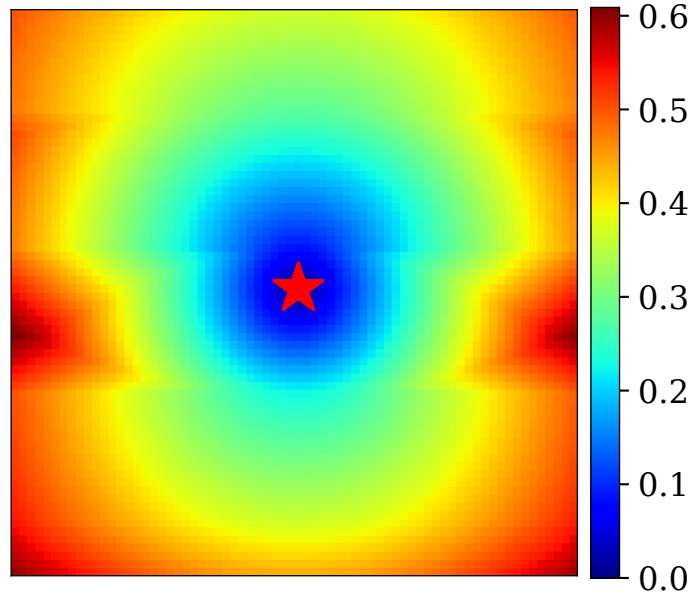

Predicted Time

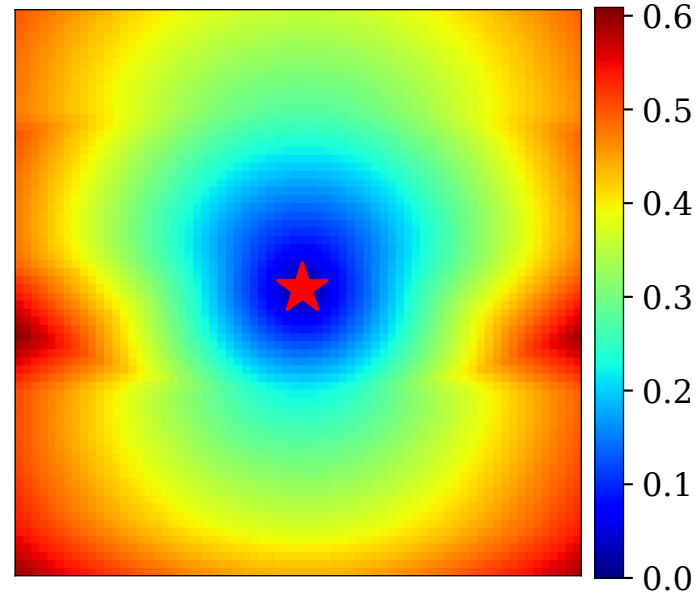

Absolute Error

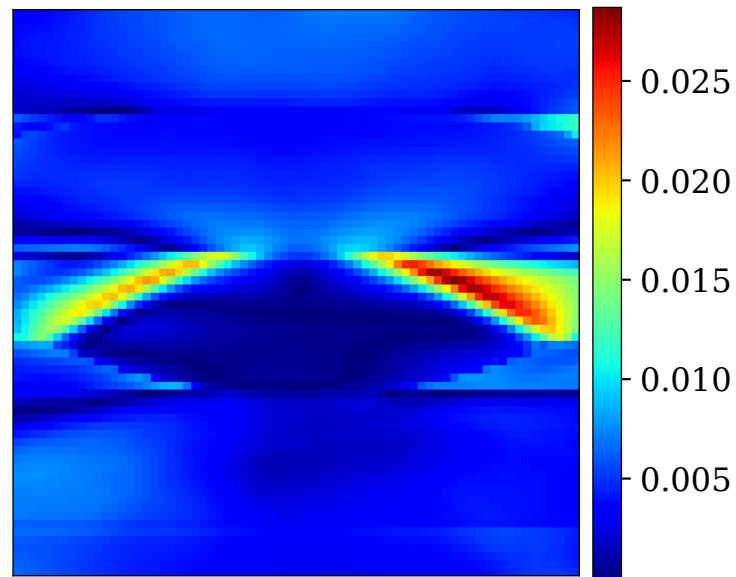

Supplement: supplementary_material [file gt_comp_full_98_(7, 7).pdf › EikonalENF_Jax-clean/experiments/fitting/figures/fwi_flatvel_b/test/gt_comp_full_98_(7, 7).pdf]

Velocity Field

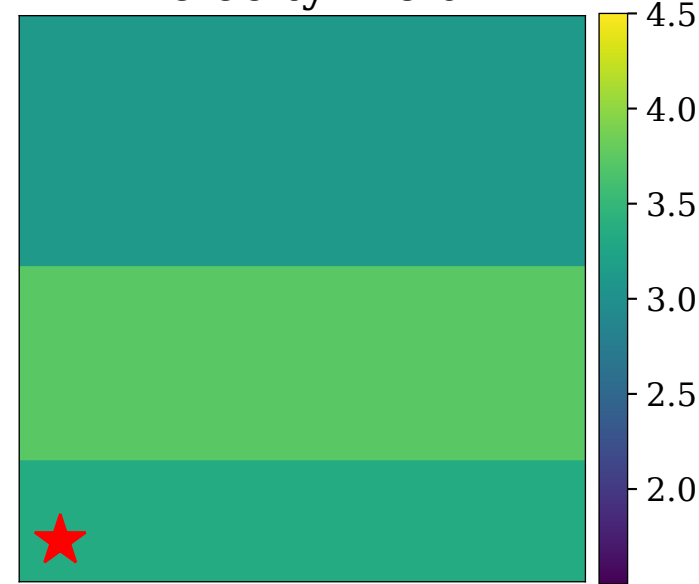

Ground Truth Time

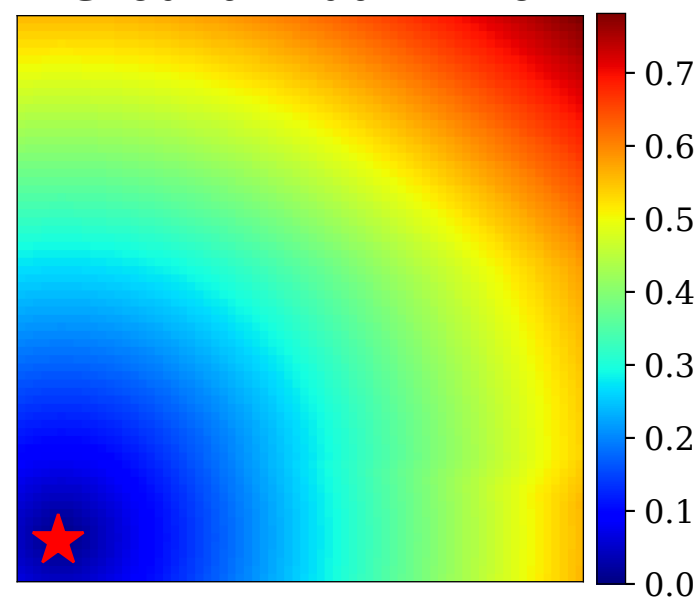

Predicted Time

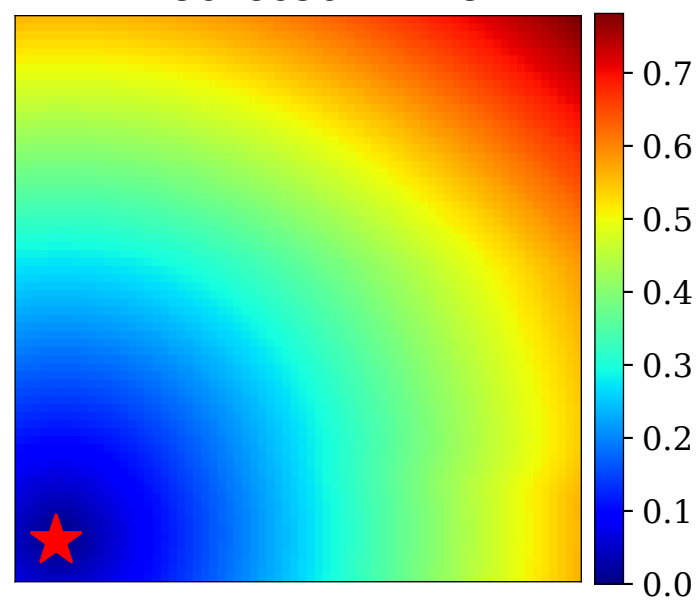

Absolute Error

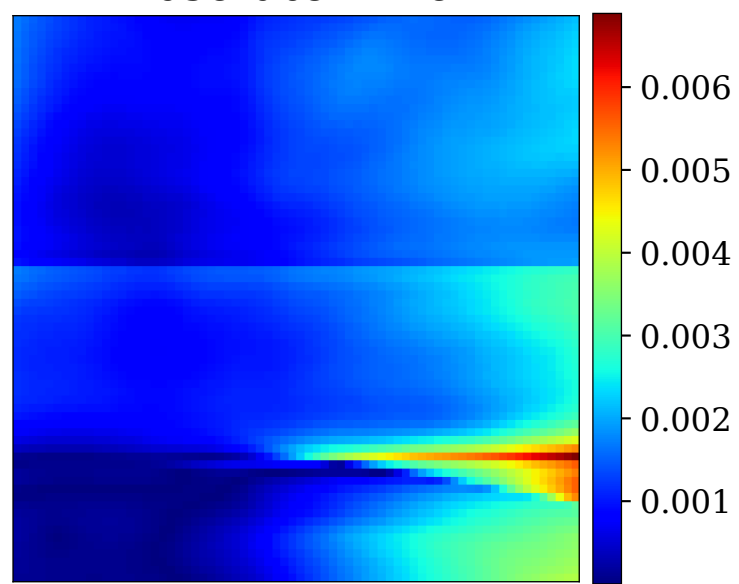

Supplement: supplementary_material [file gt_comp_full_99_(1, 1).pdf › EikonalENF_Jax-clean/experiments/fitting/figures/fwi_flatvel_b/test/gt_comp_full_99_(1, 1).pdf]

Velocity Field

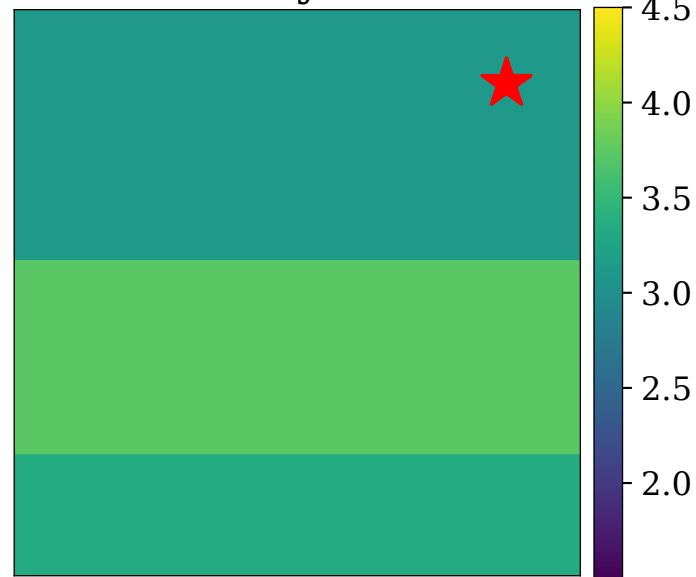

Ground Truth Time

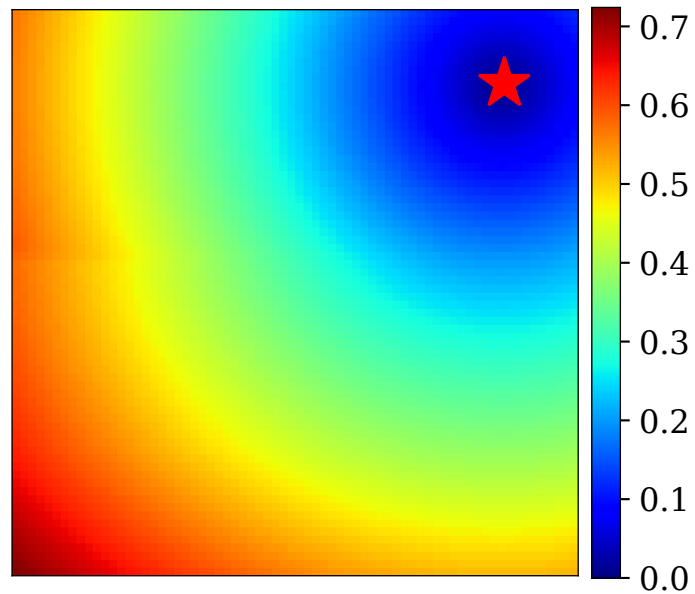

Predicted Time

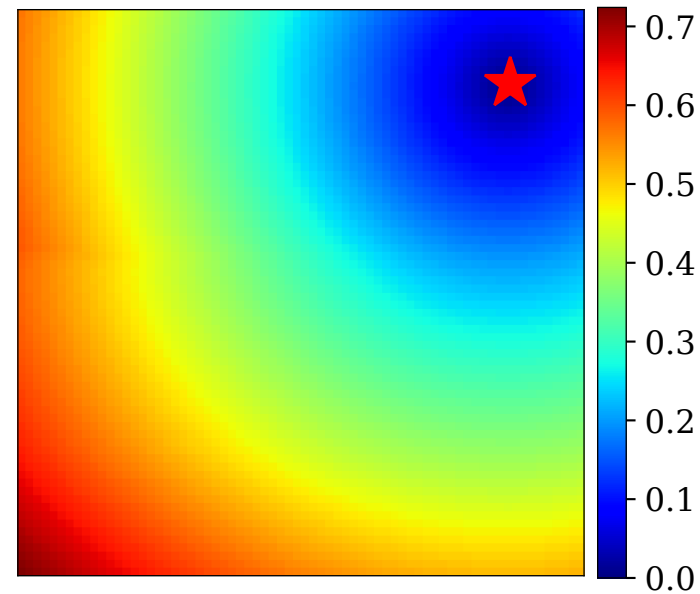

Absolute Error

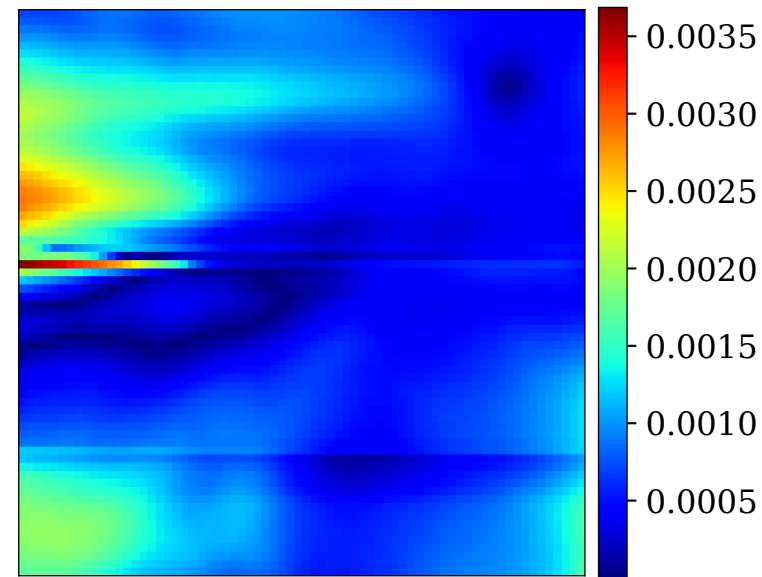

Supplement: supplementary_material [file gt_comp_full_99_(12, 12).pdf › EikonalENF_Jax-clean/experiments/fitting/figures/fwi_flatvel_b/test/gt_comp_full_99_(12, 12).pdf]

Velocity Field

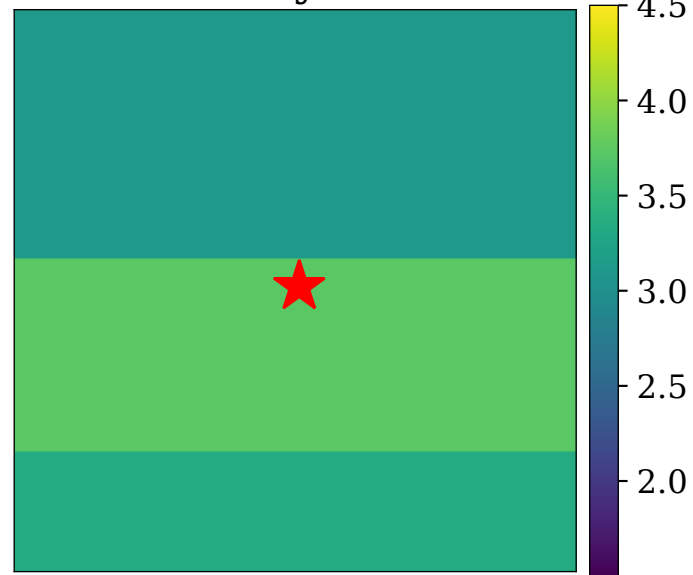

Ground Truth Time

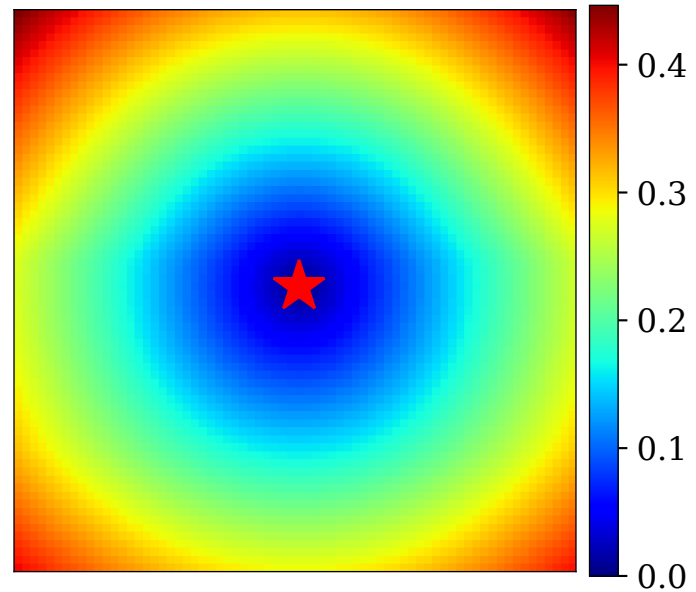

Predicted Time

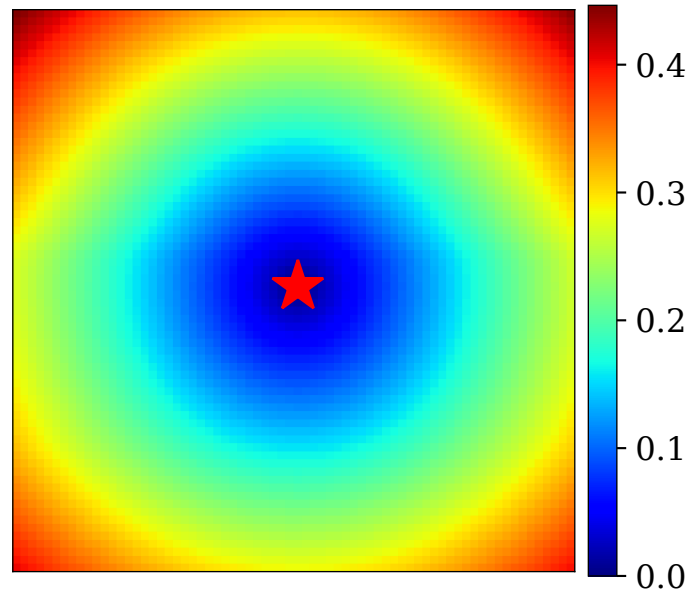

Absolute Error

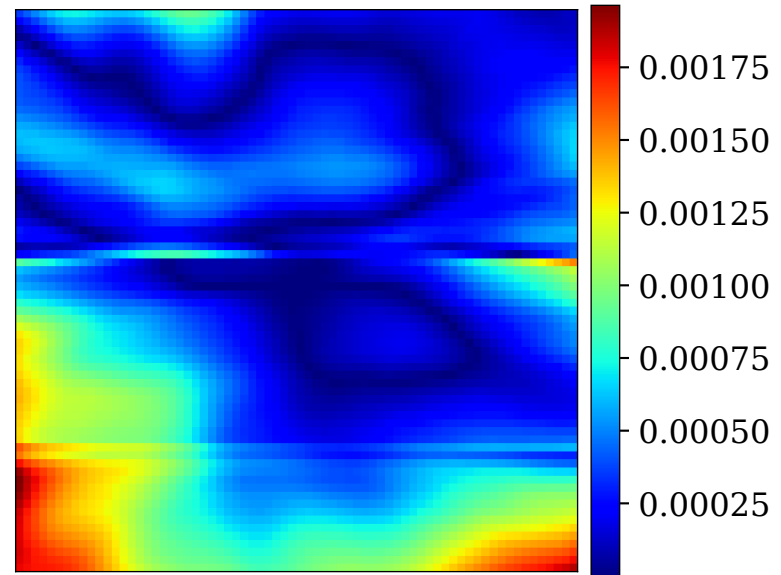

Supplement: supplementary_material [file gt_comp_full_99_(7, 7).pdf › EikonalENF_Jax-clean/experiments/fitting/figures/fwi_flatvel_b/test/gt_comp_full_99_(7, 7).pdf]

Velocity Field

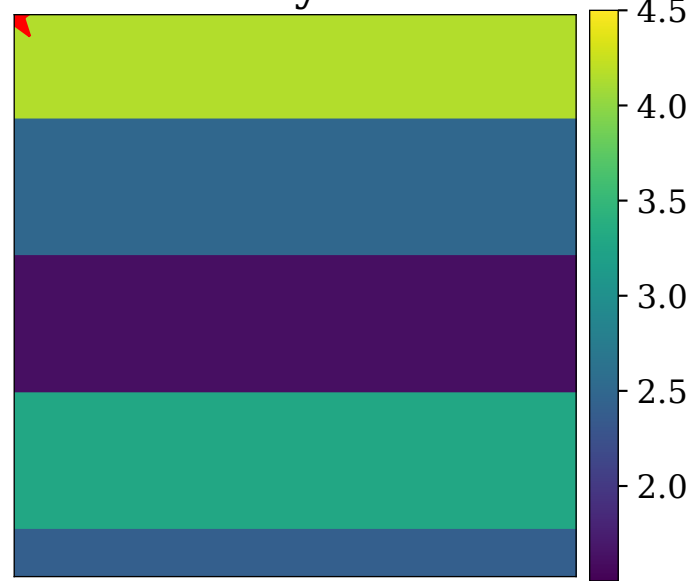

Ground Truth Time

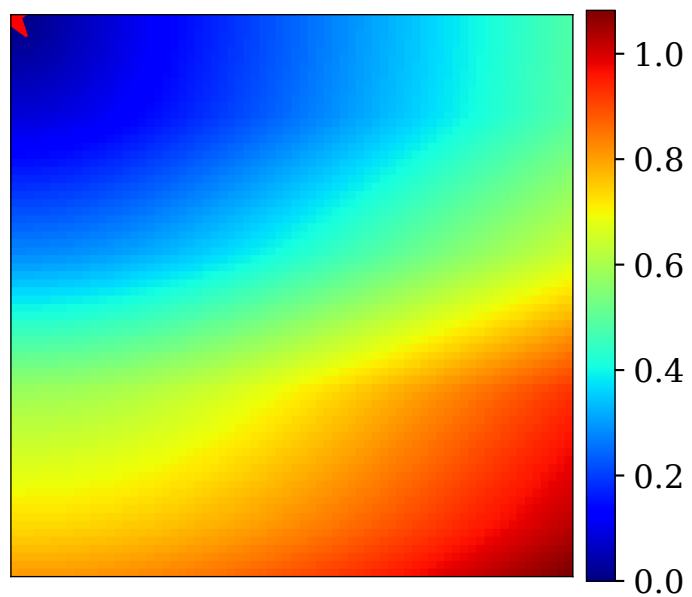

Predicted Time

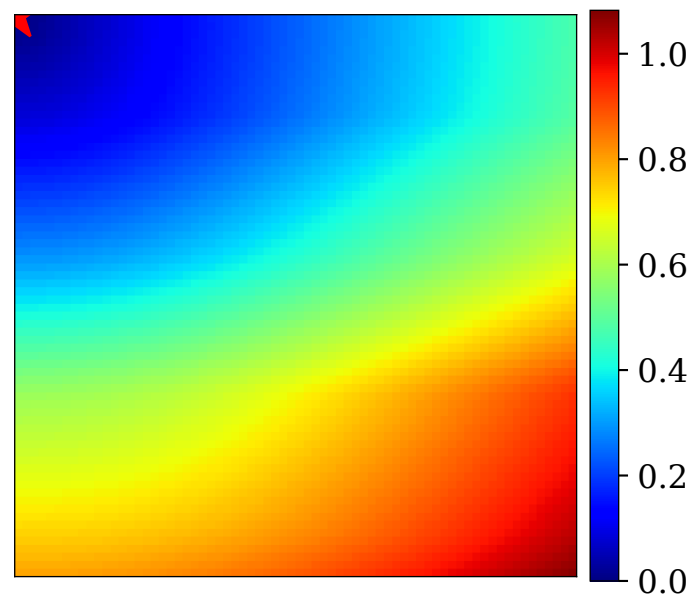

Absolute Error

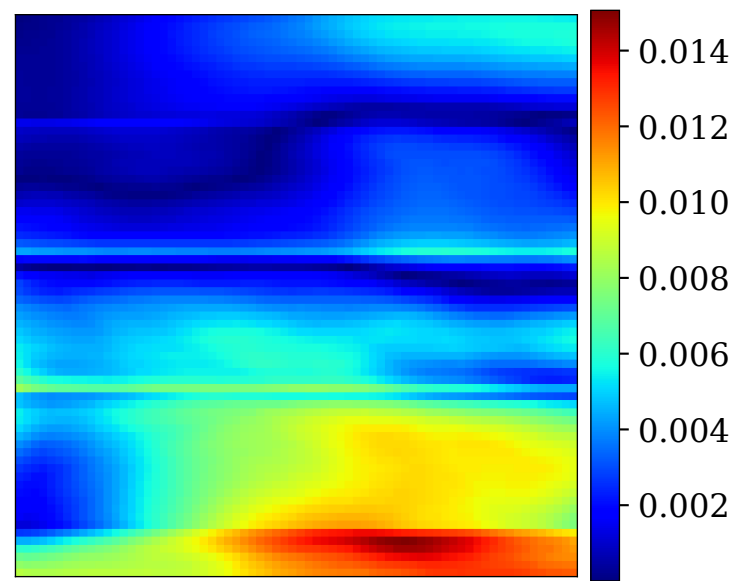

Supplement: supplementary_material [file gt_comp_top_98_(0, 0).pdf › EikonalENF_Jax-clean/experiments/fitting/figures/fwi_flatvel_b/test/gt_comp_top_98_(0, 0).pdf]

Velocity Field

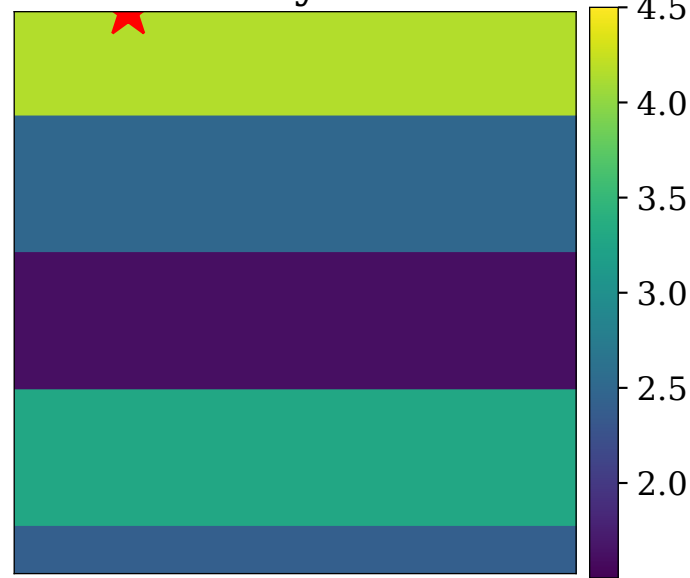

Ground Truth Time

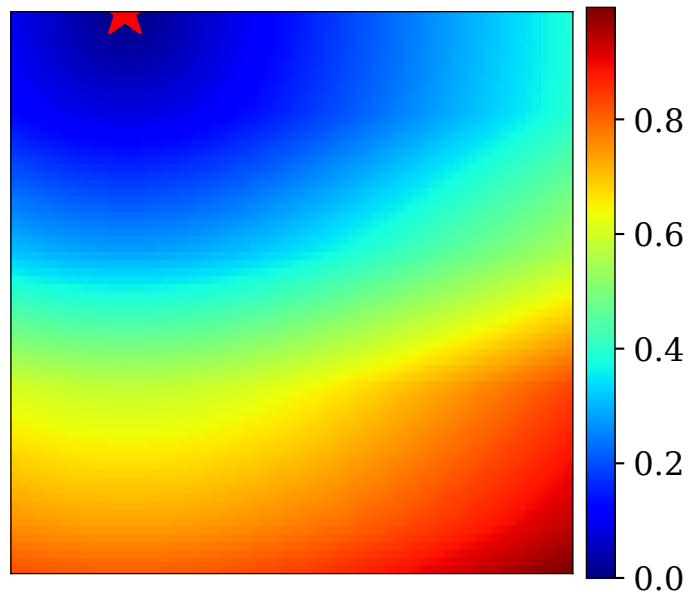

Predicted Time

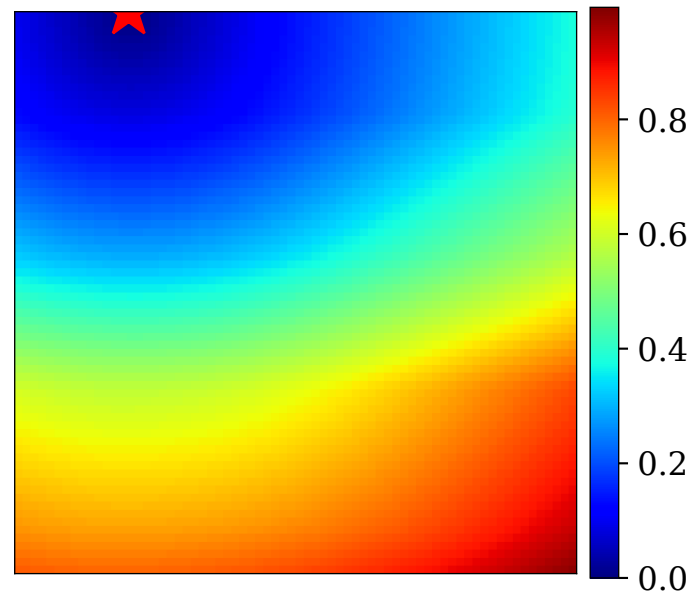

Absolute Error

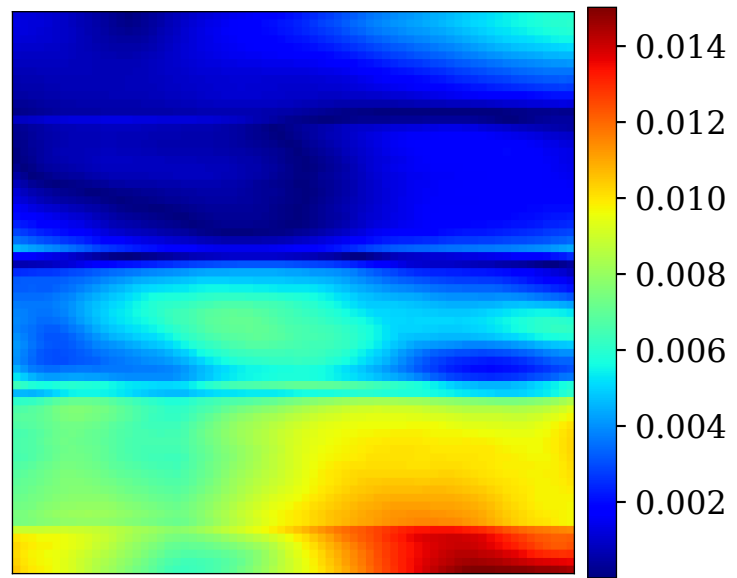

Supplement: supplementary_material [file gt_comp_top_98_(1, 0).pdf › EikonalENF_Jax-clean/experiments/fitting/figures/fwi_flatvel_b/test/gt_comp_top_98_(1, 0).pdf]

Velocity Field

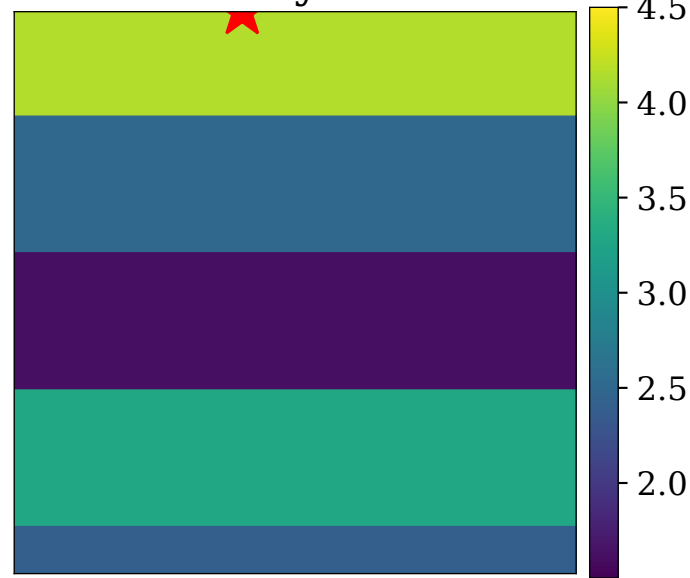

Ground Truth Time

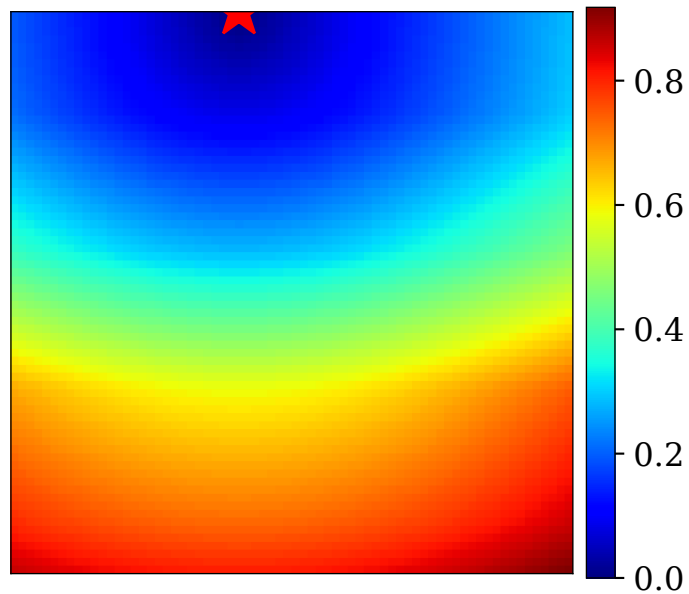

Predicted Time

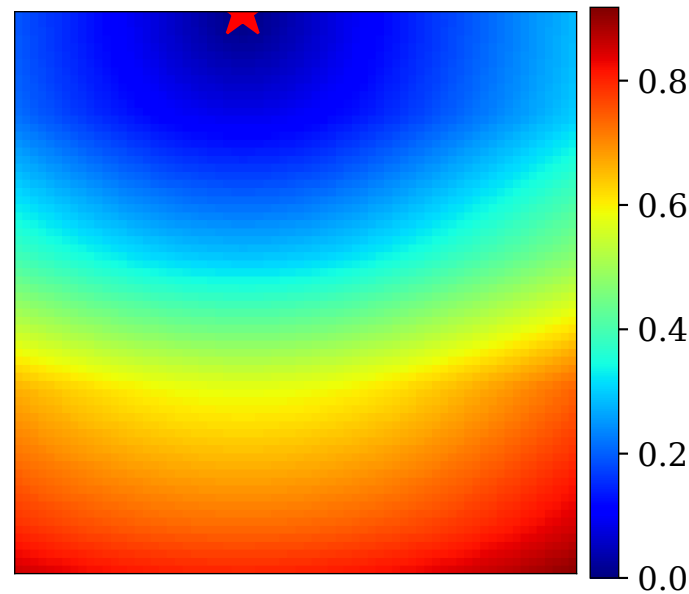

Absolute Error

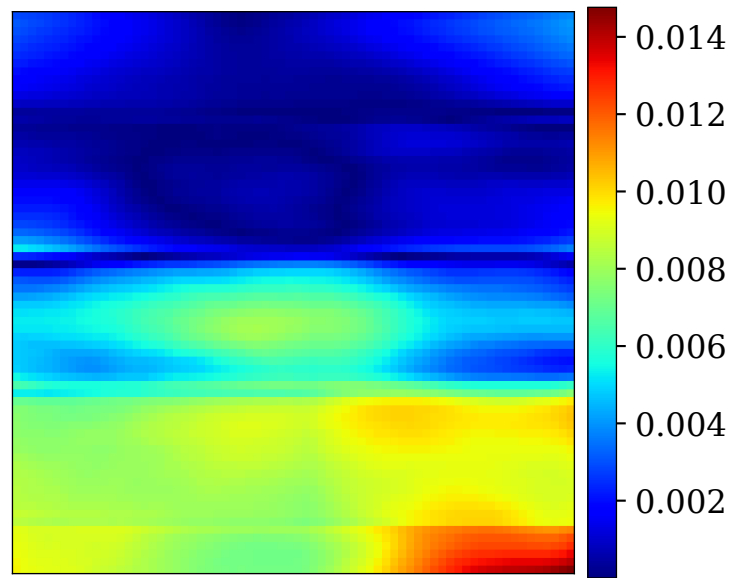

Supplement: supplementary_material [file gt_comp_top_98_(2, 0).pdf › EikonalENF_Jax-clean/experiments/fitting/figures/fwi_flatvel_b/test/gt_comp_top_98_(2, 0).pdf]

Velocity Field

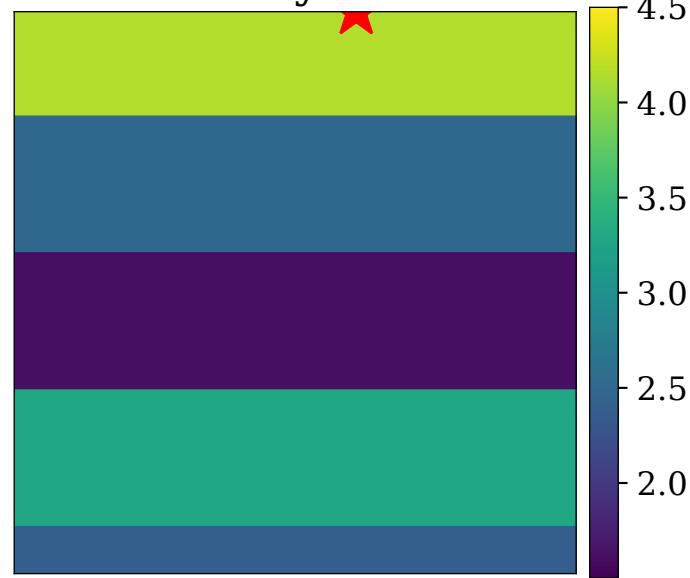

Ground Truth Time

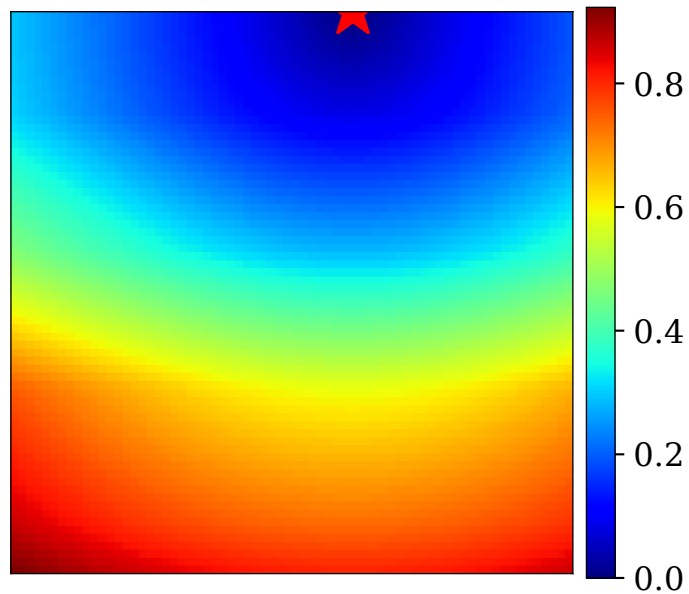

Predicted Time

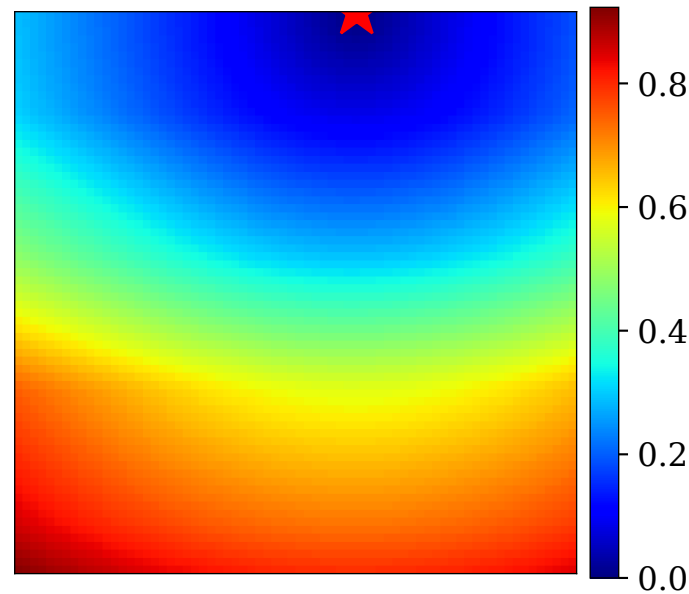

Absolute Error

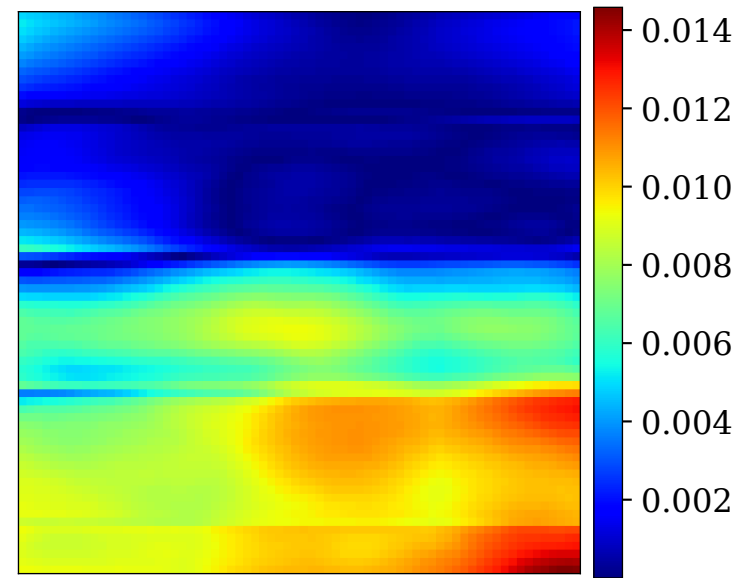

Supplement: supplementary_material [file gt_comp_top_98_(3, 0).pdf › EikonalENF_Jax-clean/experiments/fitting/figures/fwi_flatvel_b/test/gt_comp_top_98_(3, 0).pdf]

Velocity Field

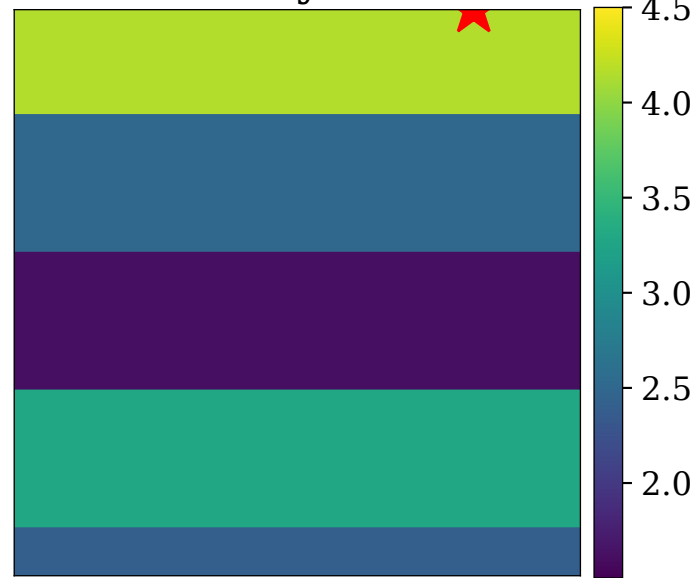

Ground Truth Time

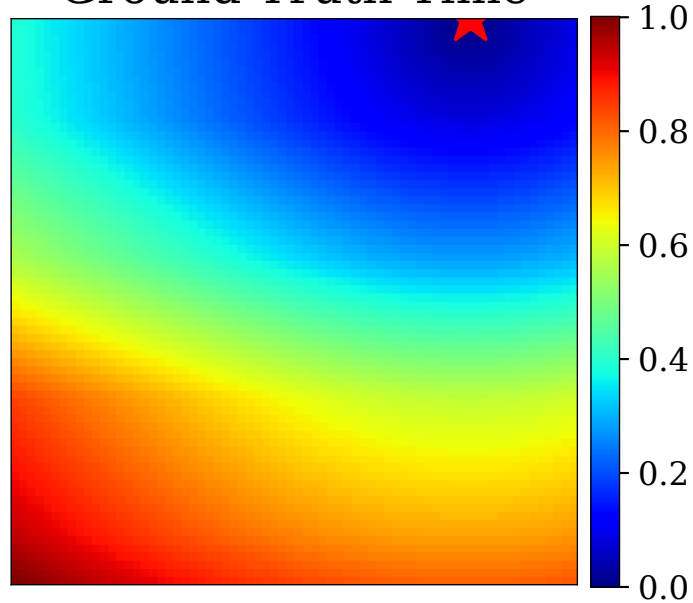

Predicted Time

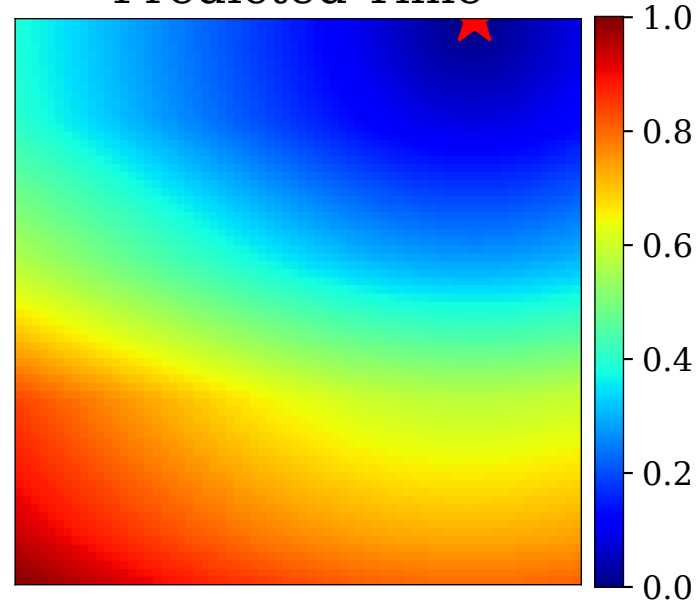

Absolute Error

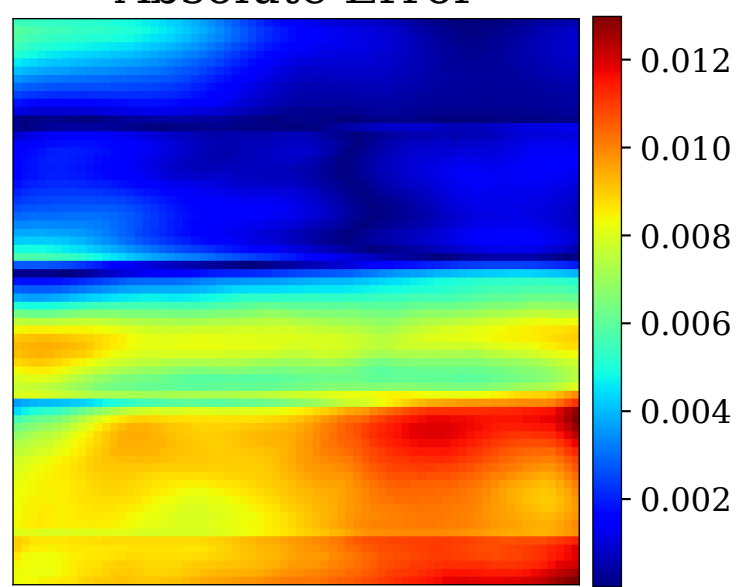

Supplement: supplementary_material [file gt_comp_top_98_(4, 0).pdf › EikonalENF_Jax-clean/experiments/fitting/figures/fwi_flatvel_b/test/gt_comp_top_98_(4, 0).pdf]

Velocity Field

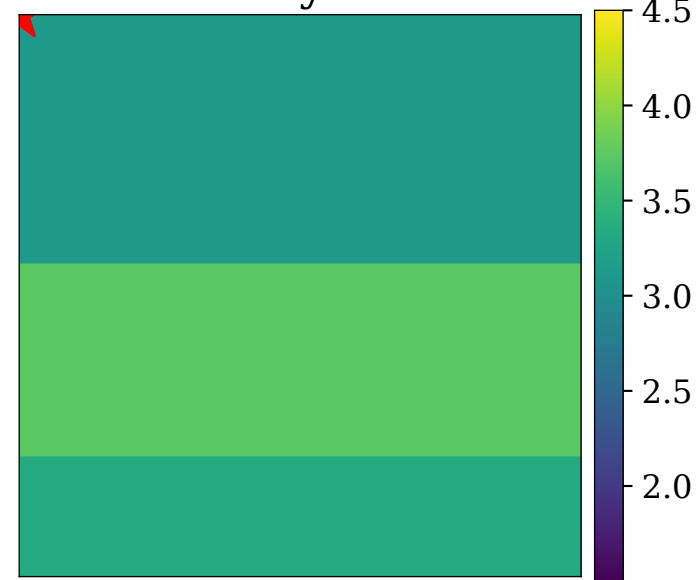

Ground Truth Time

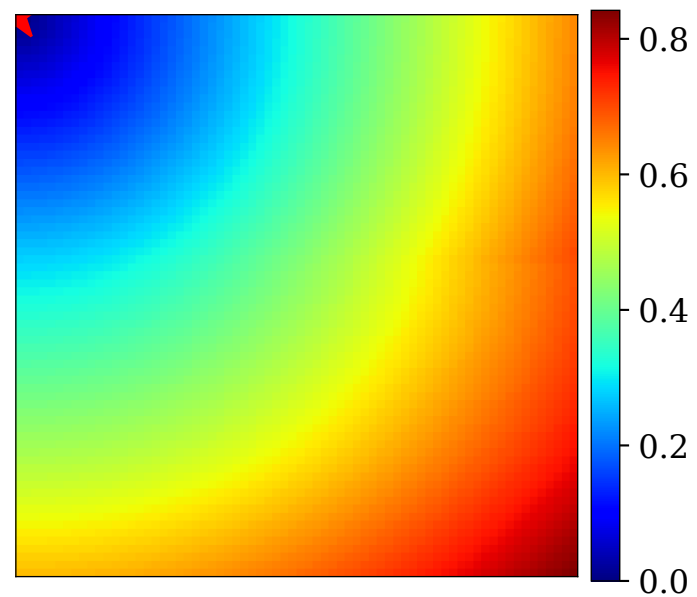

Predicted Time

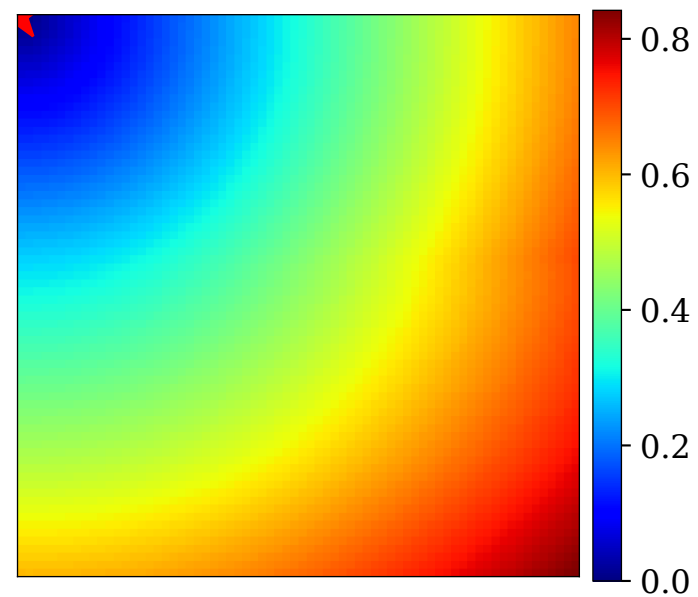

Absolute Error

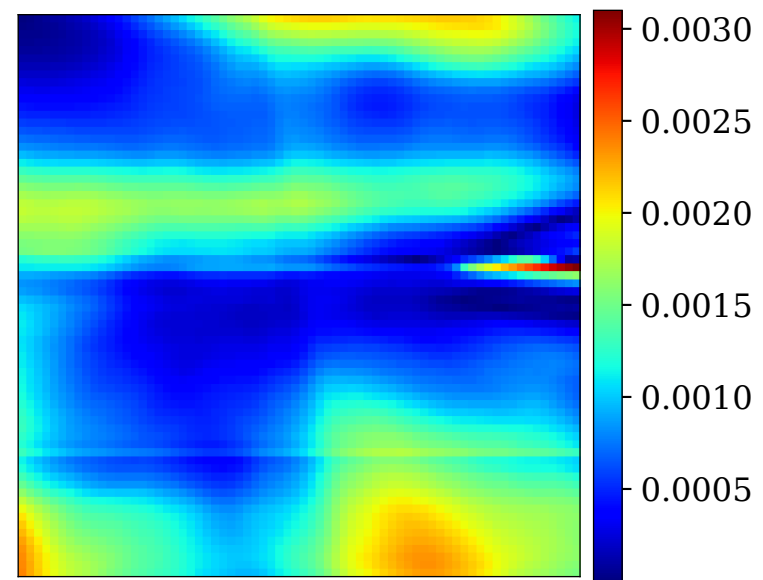

Supplement: supplementary_material [file gt_comp_top_99_(0, 0).pdf › EikonalENF_Jax-clean/experiments/fitting/figures/fwi_flatvel_b/test/gt_comp_top_99_(0, 0).pdf]

Velocity Field

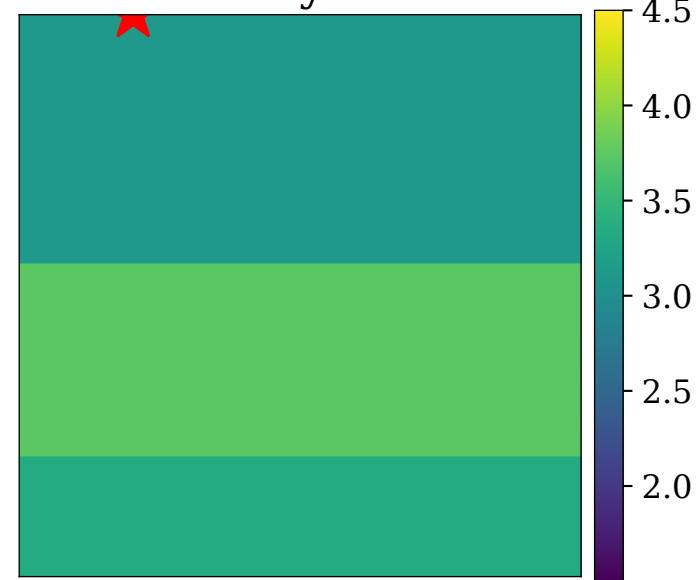

Ground Truth Time

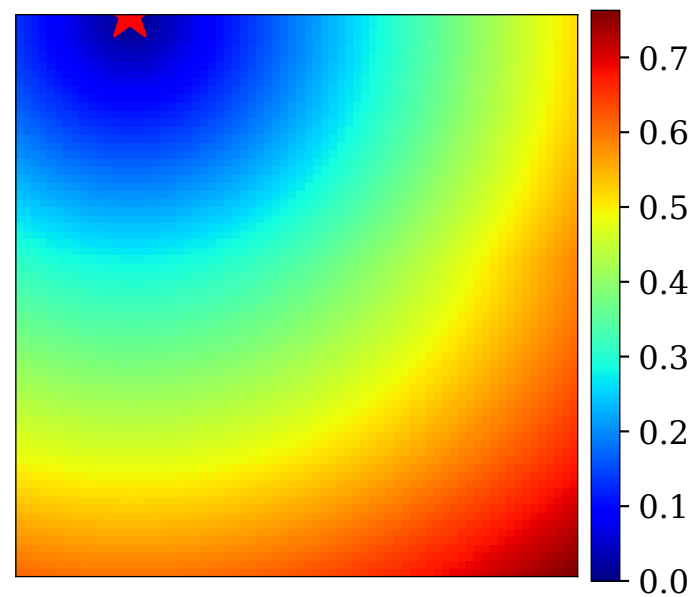

Predicted Time

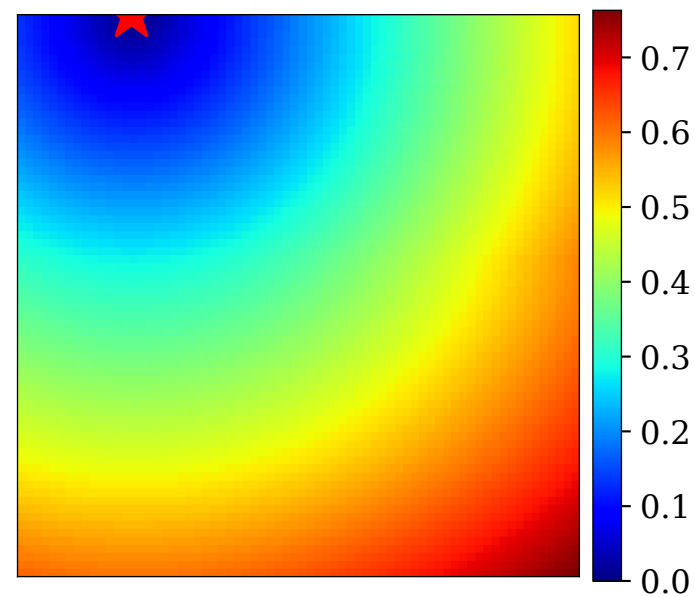

Absolute Error

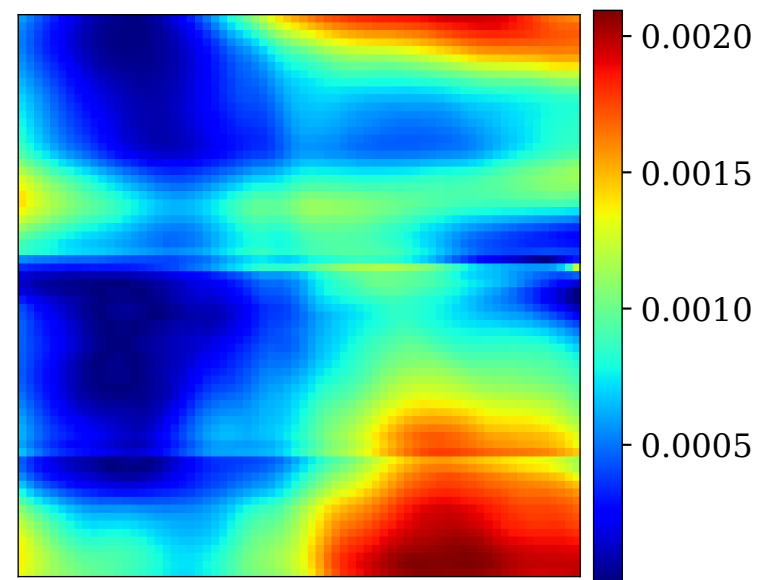

Supplement: supplementary_material [file gt_comp_top_99_(1, 0).pdf › EikonalENF_Jax-clean/experiments/fitting/figures/fwi_flatvel_b/test/gt_comp_top_99_(1, 0).pdf]

Velocity Field

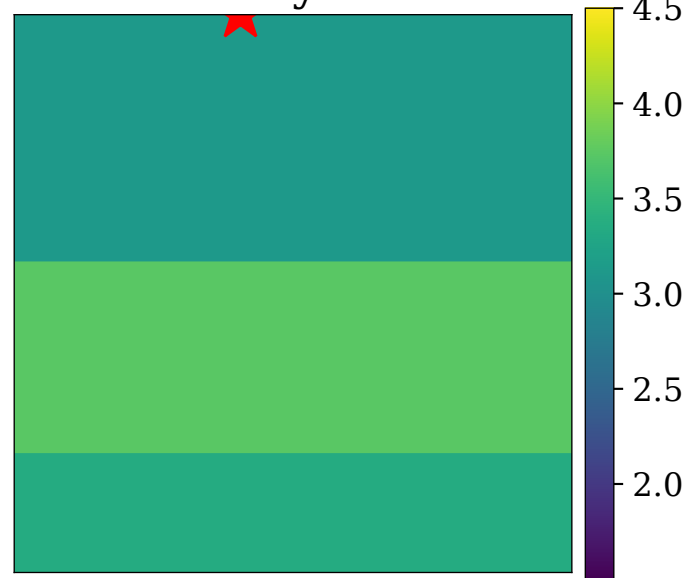

Ground Truth Time

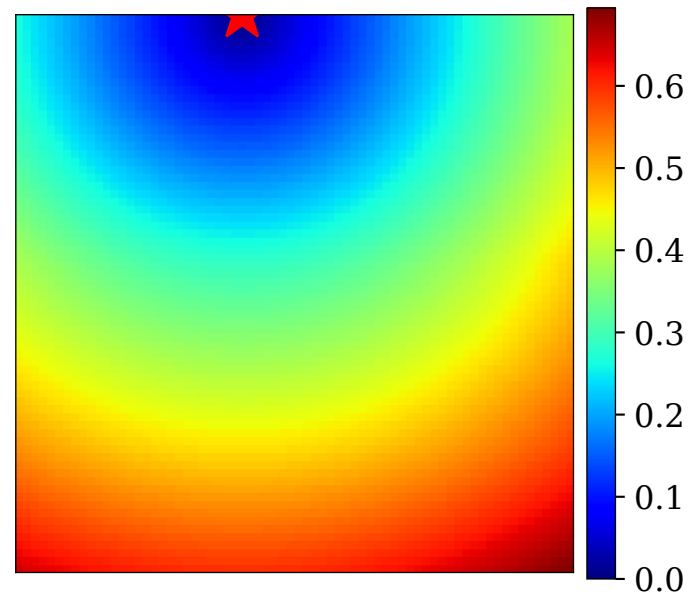

Predicted Time

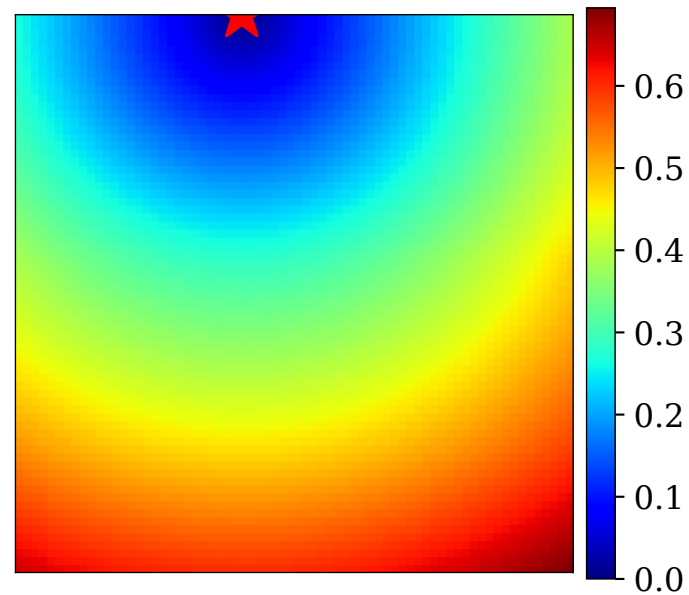

Absolute Error

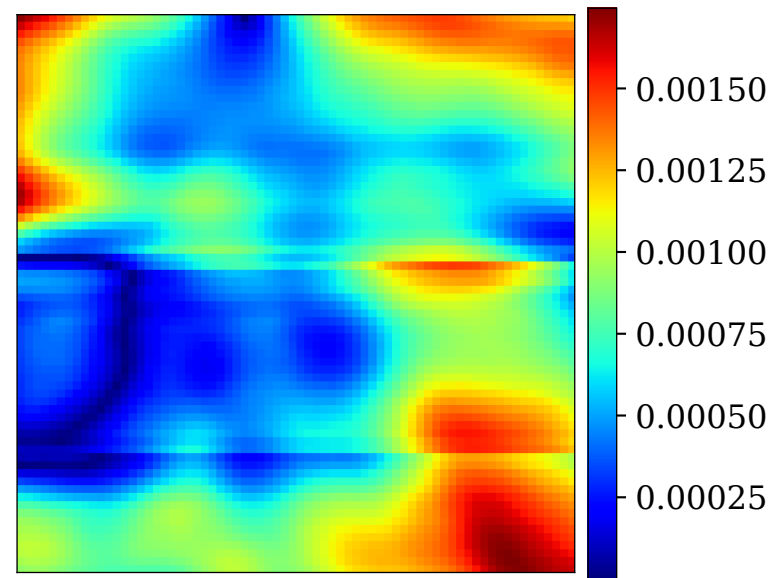

Supplement: supplementary_material [file gt_comp_top_99_(2, 0).pdf › EikonalENF_Jax-clean/experiments/fitting/figures/fwi_flatvel_b/test/gt_comp_top_99_(2, 0).pdf]

Velocity Field

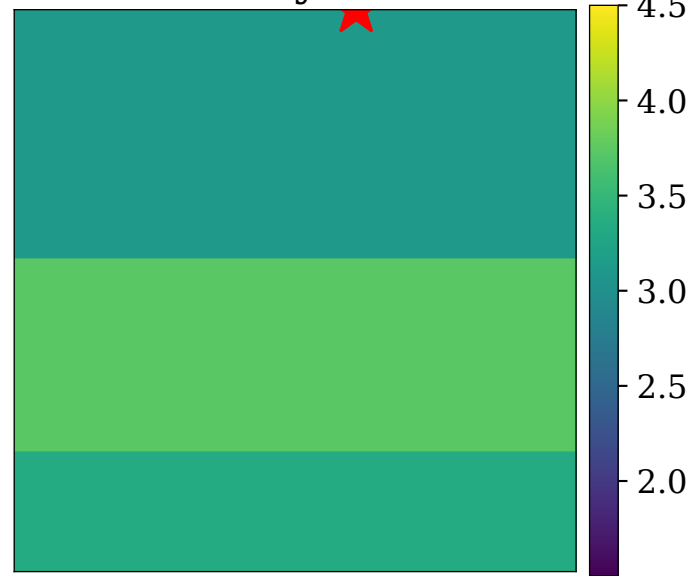

Ground Truth Time

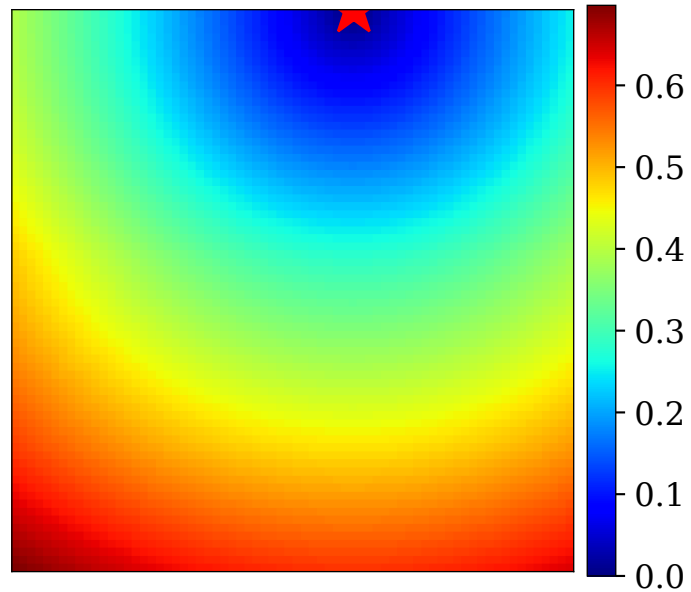

Predicted Time

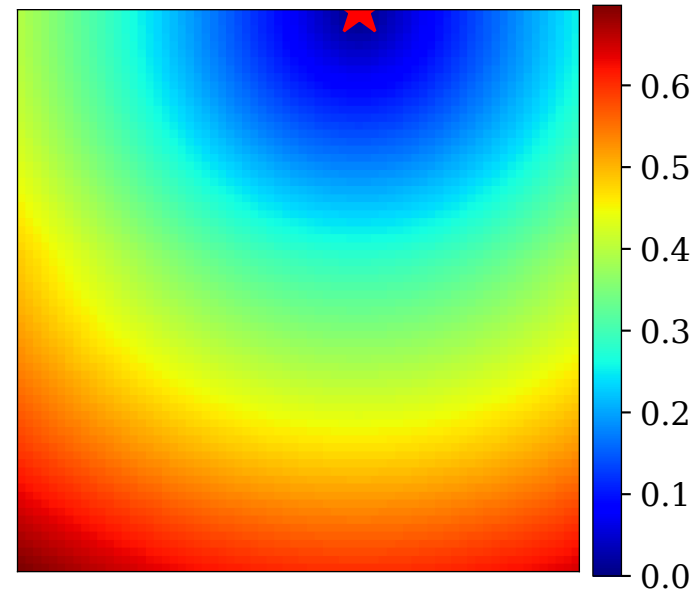

Absolute Error

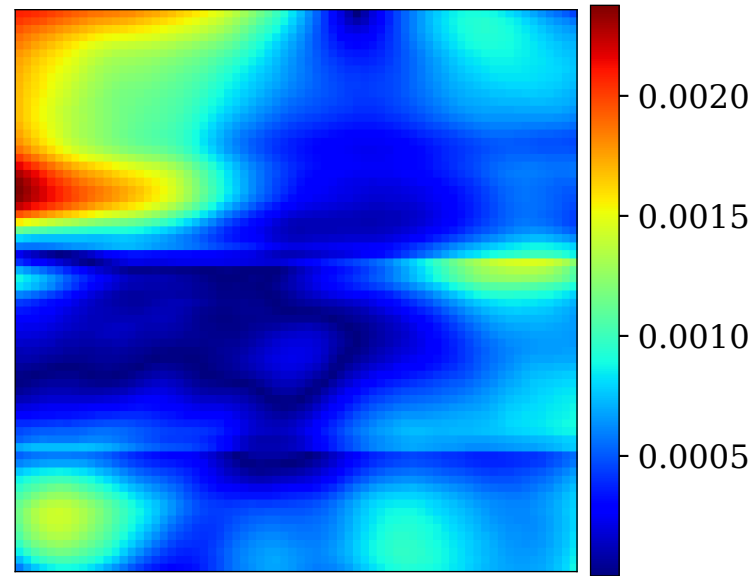

Supplement: supplementary_material [file gt_comp_top_99_(3, 0).pdf › EikonalENF_Jax-clean/experiments/fitting/figures/fwi_flatvel_b/test/gt_comp_top_99_(3, 0).pdf]

Velocity Field

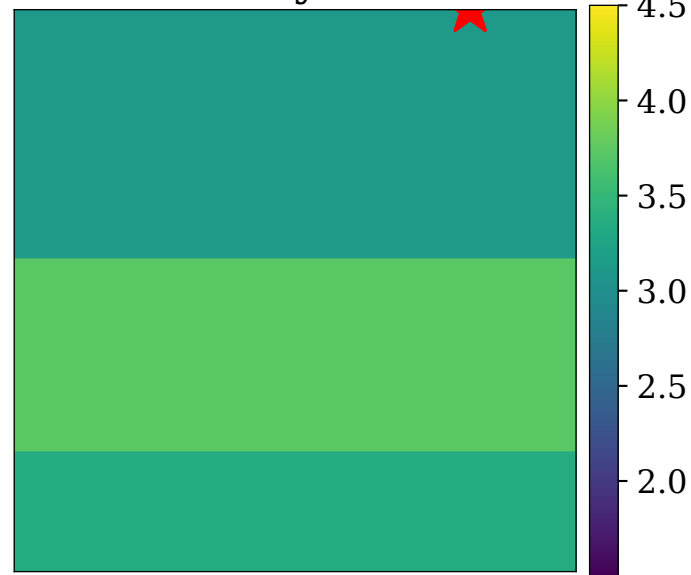

Ground Truth Time

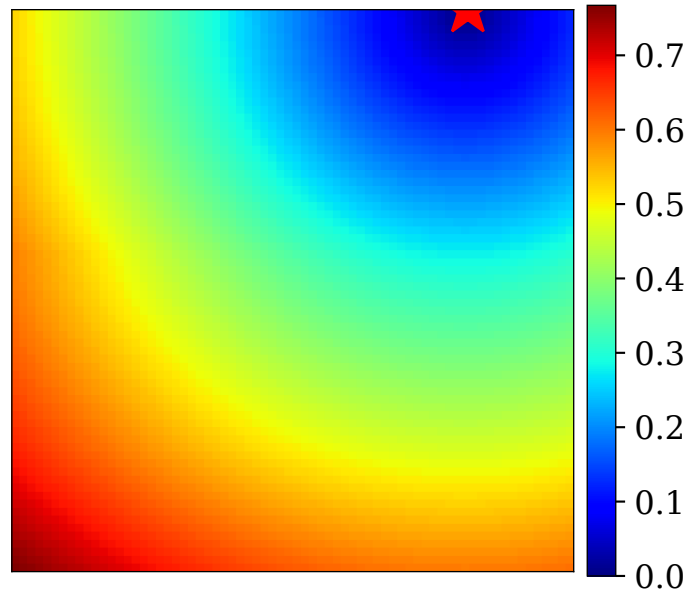

Predicted Time

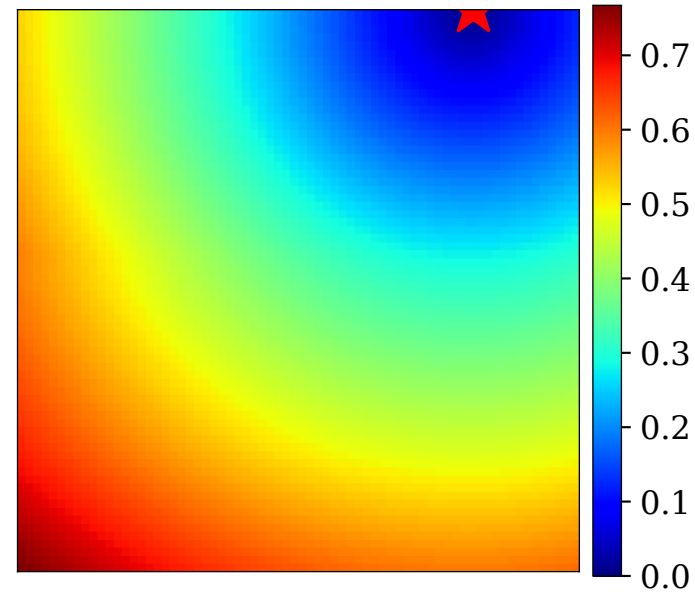

Absolute Error

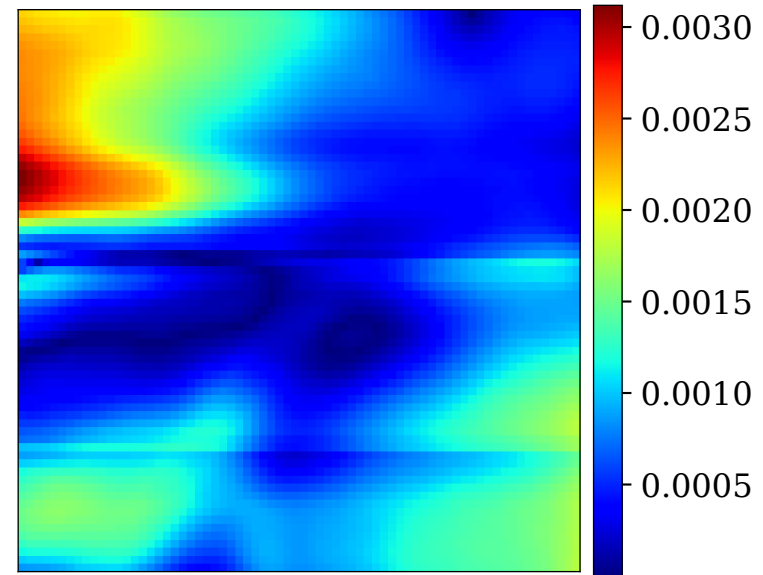

Supplement: supplementary_material [file gt_comp_top_99_(4, 0).pdf › EikonalENF_Jax-clean/experiments/fitting/figures/fwi_flatvel_b/test/gt_comp_top_99_(4, 0).pdf]

Velocity Field

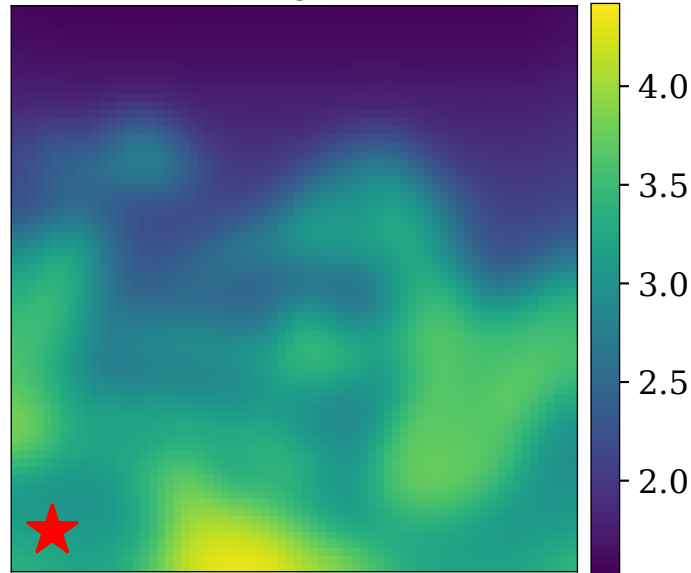

Ground Truth Time

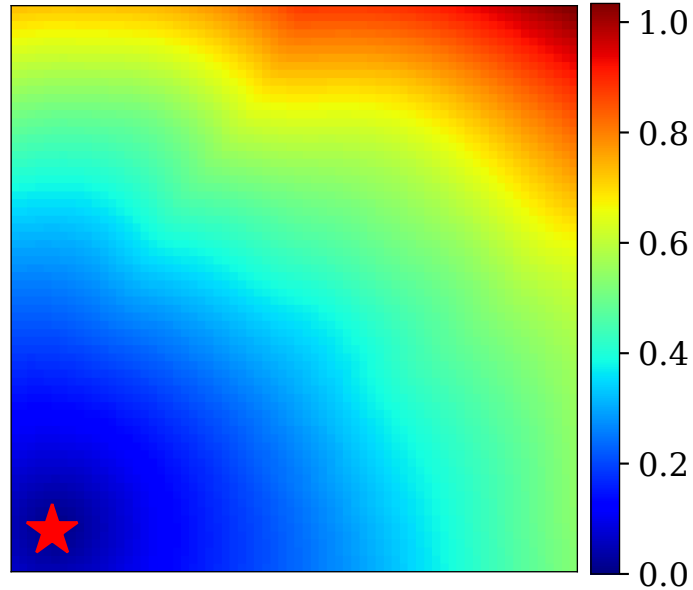

Predicted Time

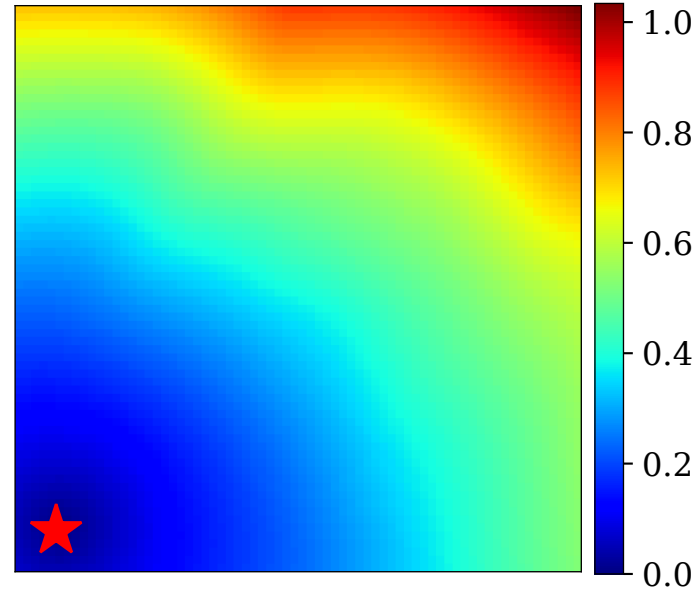

Absolute Error

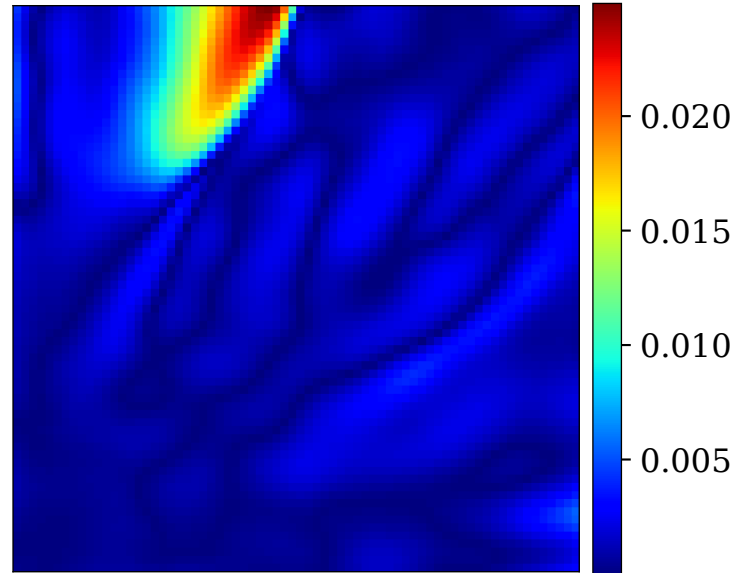

Supplement: supplementary_material [file gt_comp_full_98_(1, 1).pdf › EikonalENF_Jax-clean/experiments/fitting/figures/fwi_style_a/test/gt_comp_full_98_(1, 1).pdf]

Velocity Field

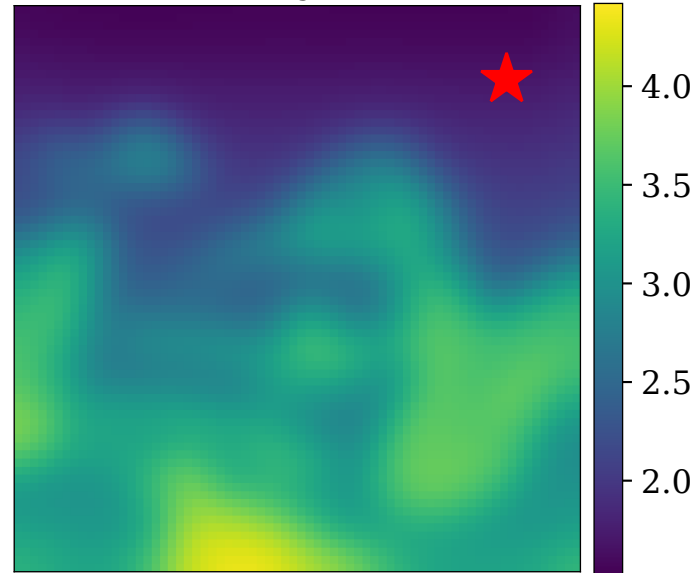

Ground Truth Time

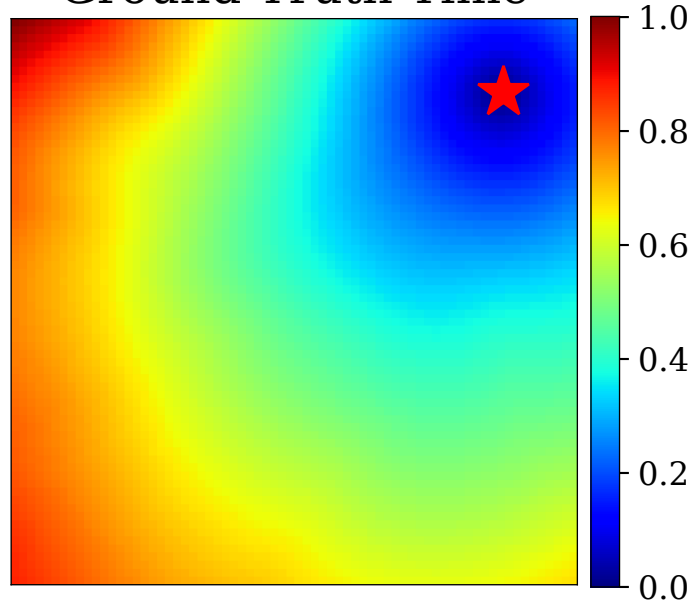

Predicted Time

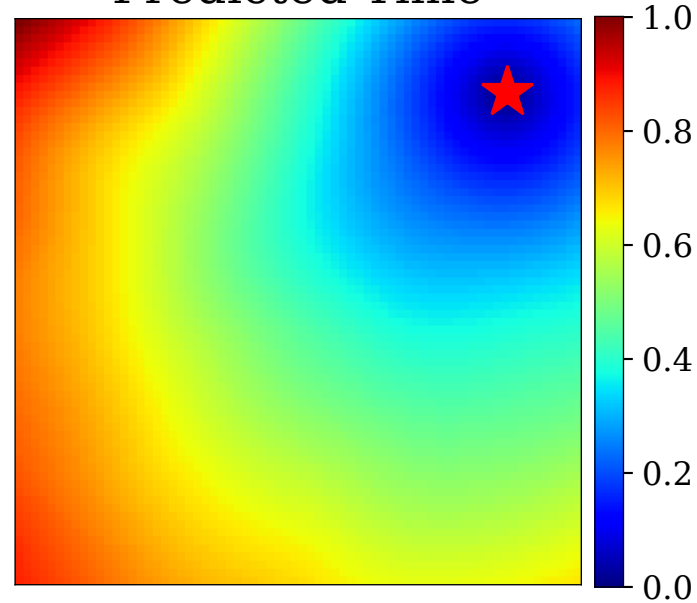

Absolute Error

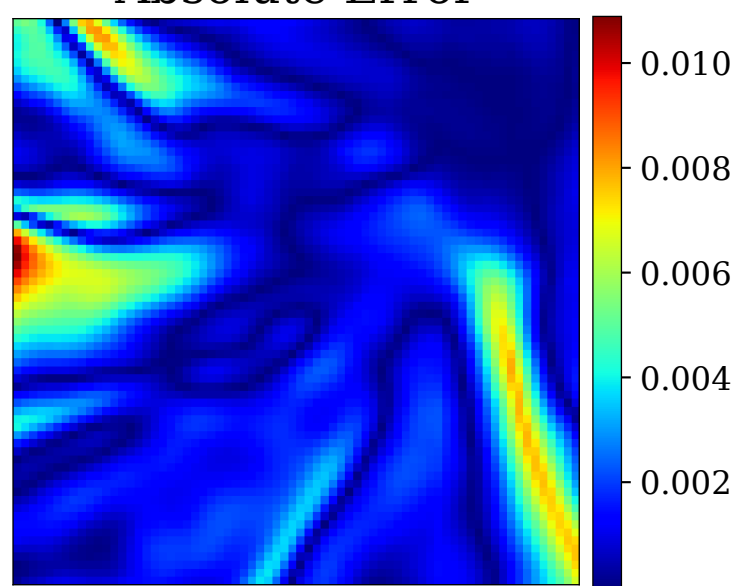

Supplement: supplementary_material [file gt_comp_full_98_(12, 12).pdf › EikonalENF_Jax-clean/experiments/fitting/figures/fwi_style_a/test/gt_comp_full_98_(12, 12).pdf]

Velocity Field

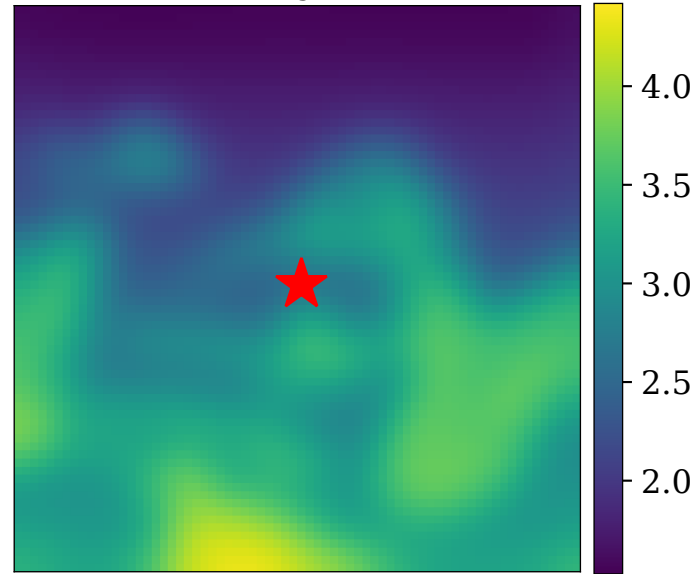

Ground Truth Time

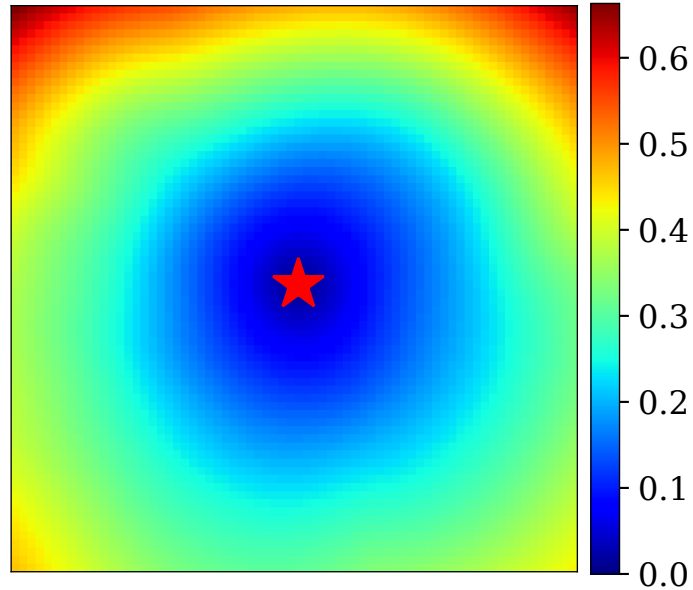

Predicted Time

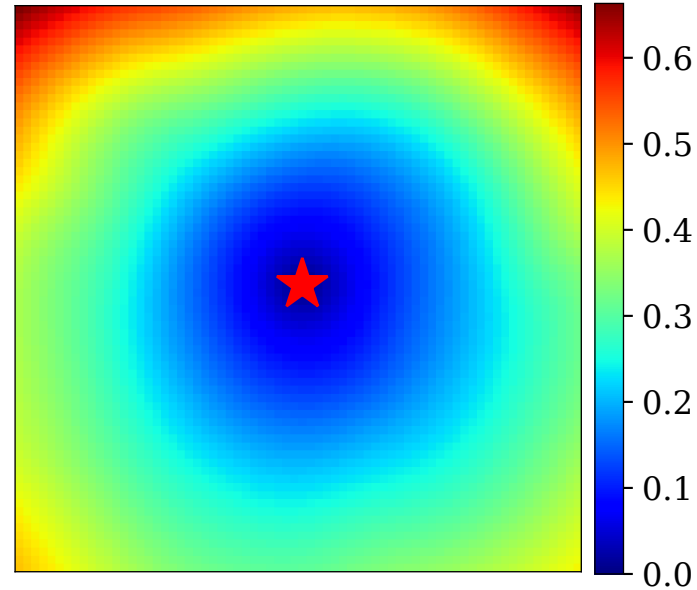

Absolute Error

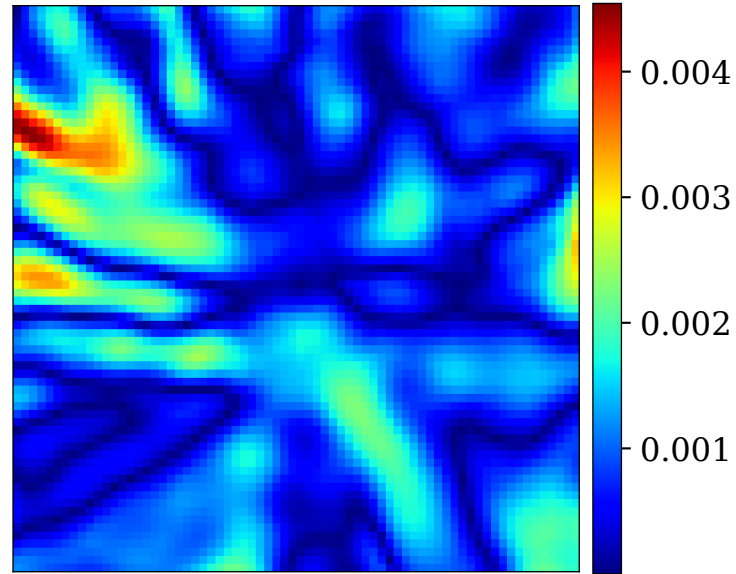

Supplement: supplementary_material [file gt_comp_full_98_(7, 7).pdf › EikonalENF_Jax-clean/experiments/fitting/figures/fwi_style_a/test/gt_comp_full_98_(7, 7).pdf]

Velocity Field

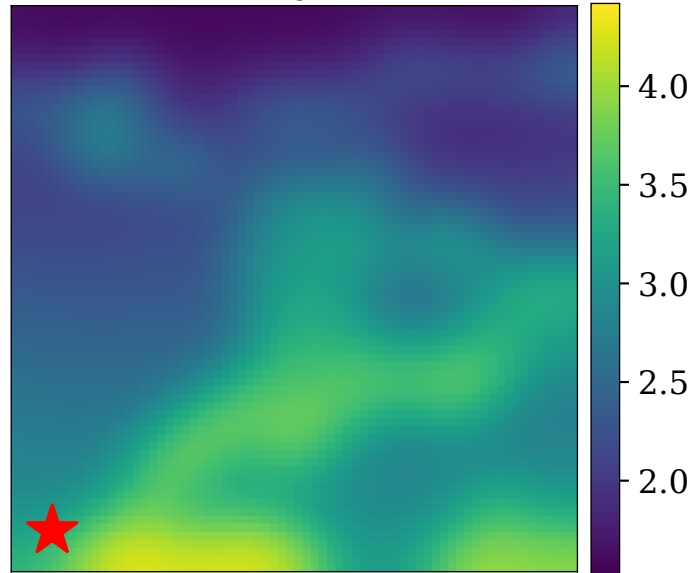

Ground Truth Time

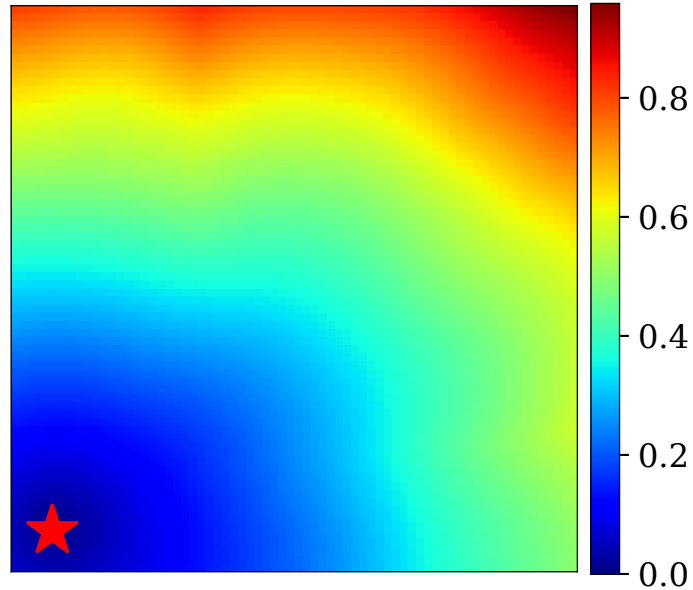

Predicted Time

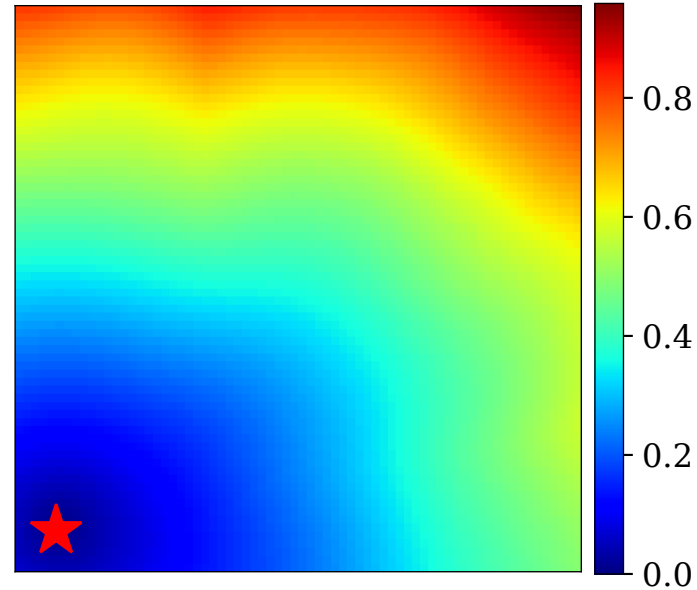

Absolute Error

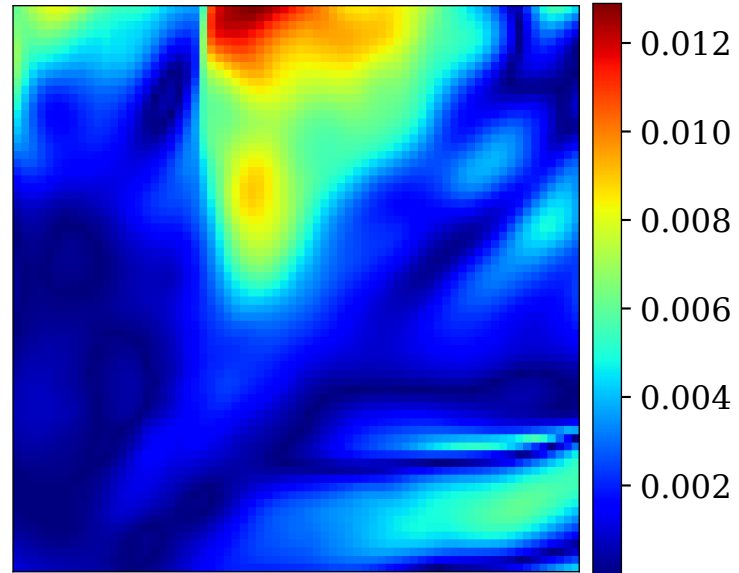

Supplement: supplementary_material [file gt_comp_full_99_(1, 1).pdf › EikonalENF_Jax-clean/experiments/fitting/figures/fwi_style_a/test/gt_comp_full_99_(1, 1).pdf]

Velocity Field

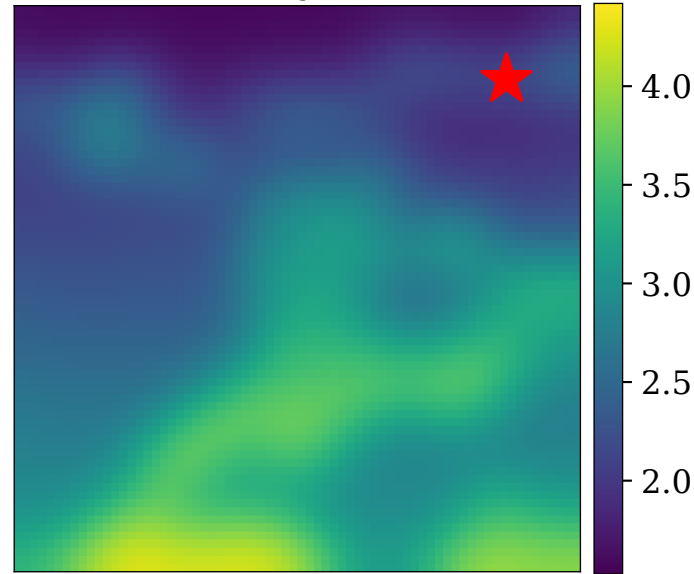

Ground Truth Time

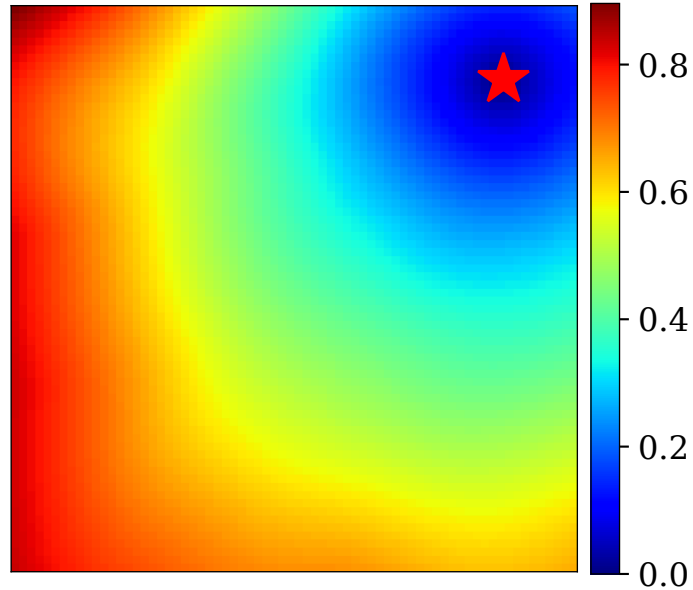

Predicted Time

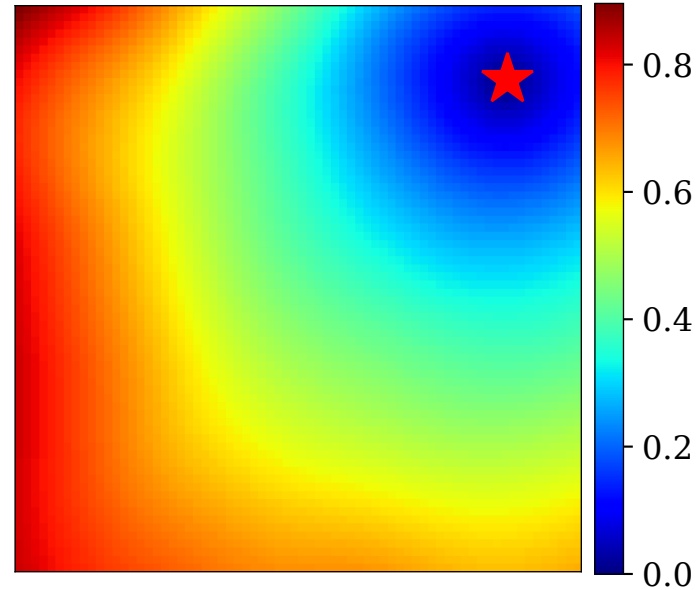

Absolute Error

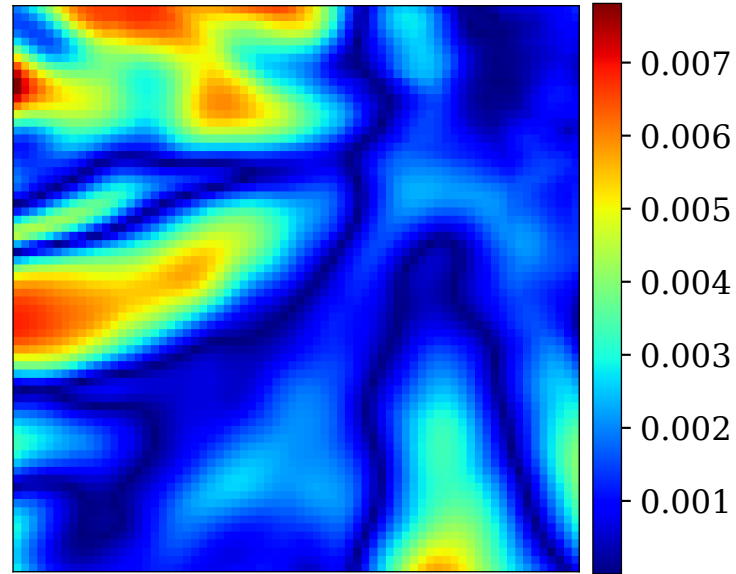

Supplement: supplementary_material [file gt_comp_full_99_(12, 12).pdf › EikonalENF_Jax-clean/experiments/fitting/figures/fwi_style_a/test/gt_comp_full_99_(12, 12).pdf]

Velocity Field

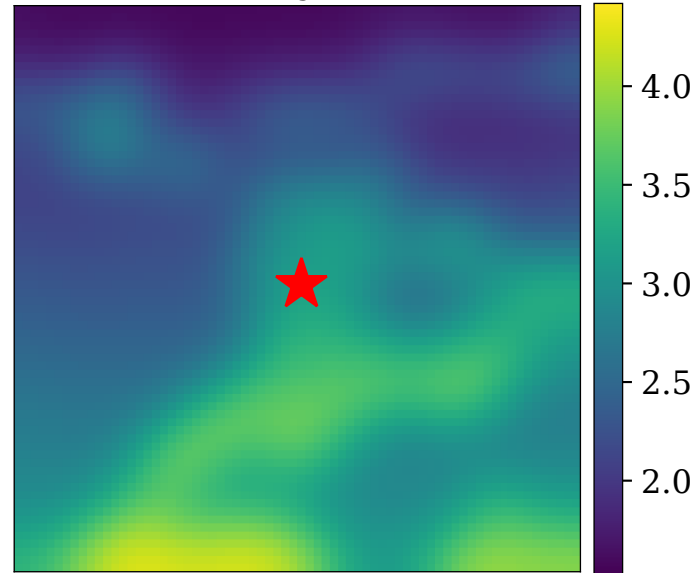

Ground Truth Time

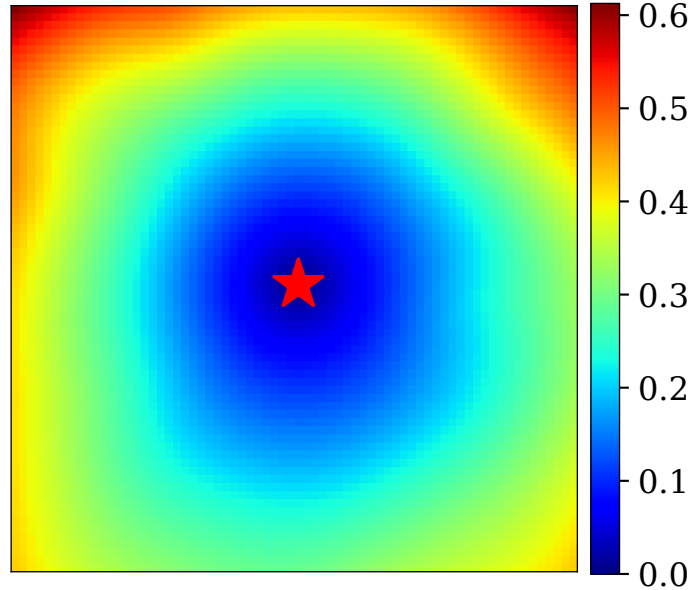

Predicted Time

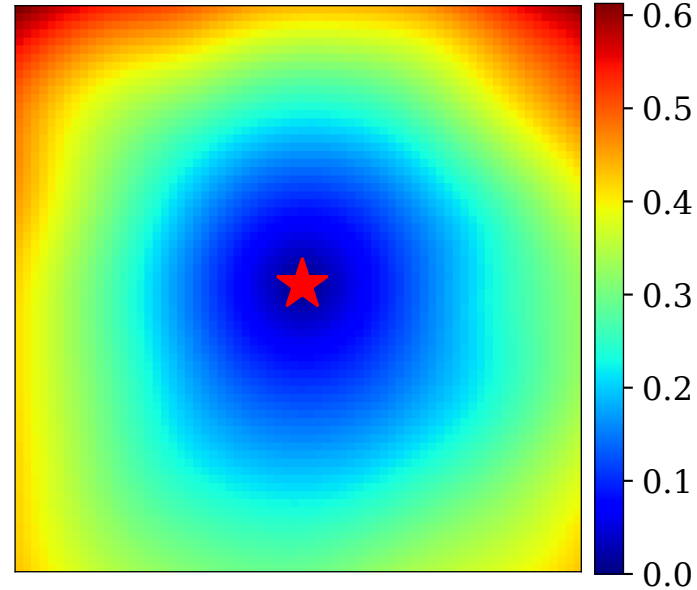

Absolute Error

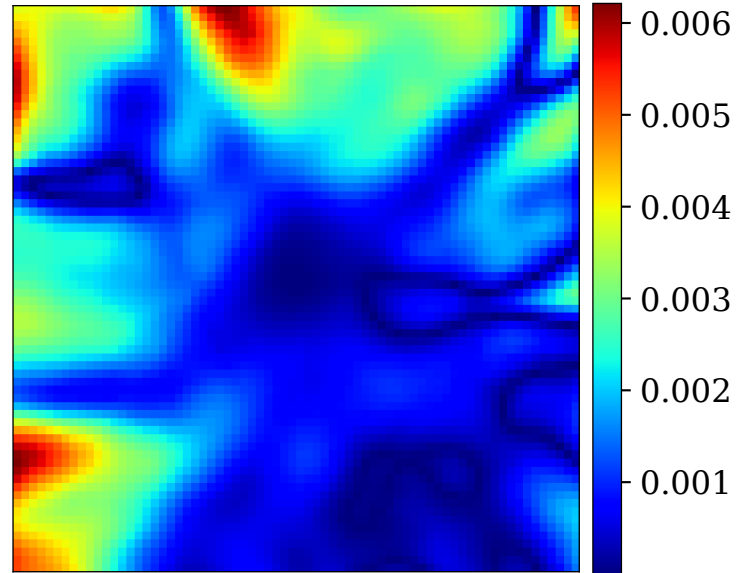

Supplement: supplementary_material [file gt_comp_full_99_(7, 7).pdf › EikonalENF_Jax-clean/experiments/fitting/figures/fwi_style_a/test/gt_comp_full_99_(7, 7).pdf]

Velocity Field

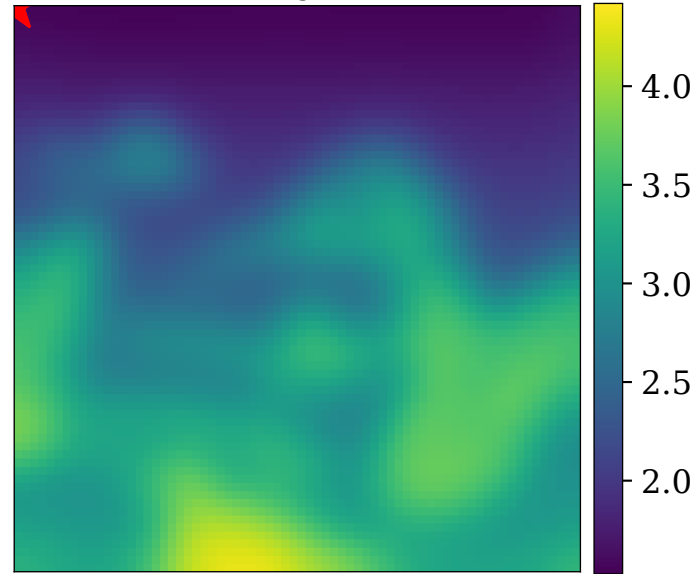

Ground Truth Time

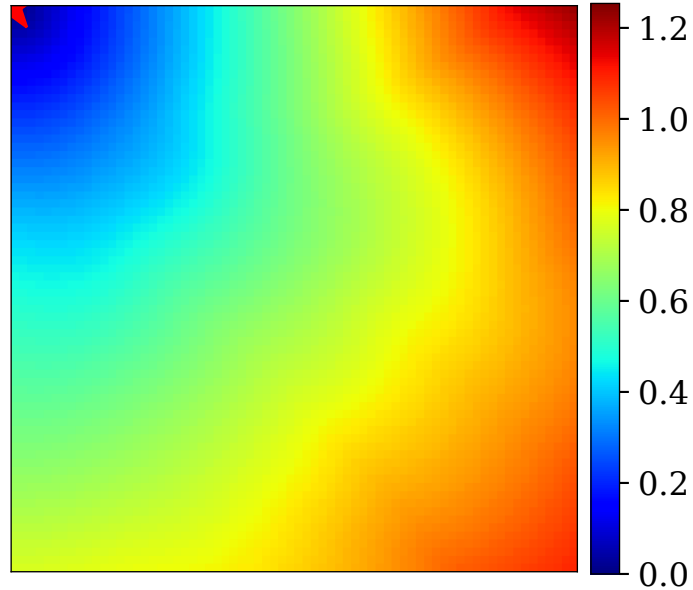

Predicted Time

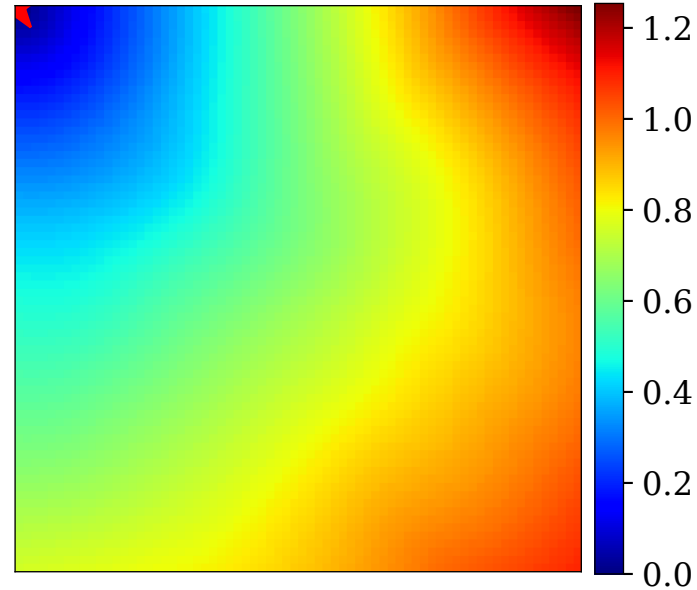

Absolute Error

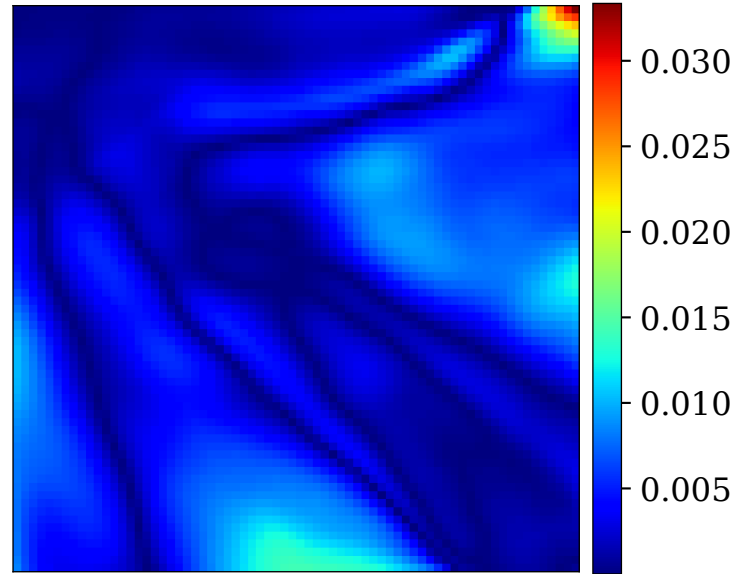

Supplement: supplementary_material [file gt_comp_top_98_(0, 0).pdf › EikonalENF_Jax-clean/experiments/fitting/figures/fwi_style_a/test/gt_comp_top_98_(0, 0).pdf]

Velocity Field

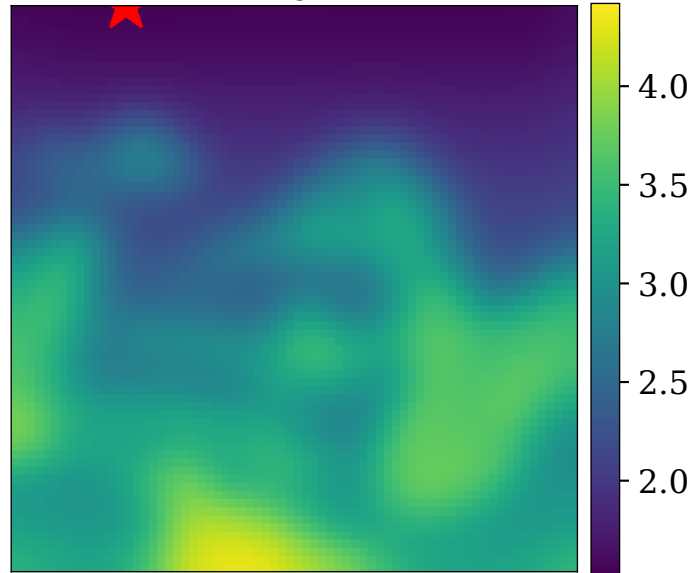

Ground Truth Time

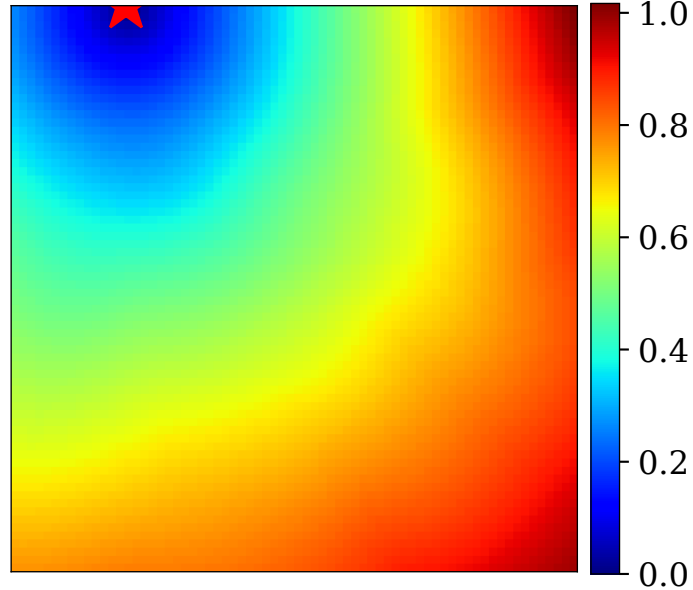

Predicted Time

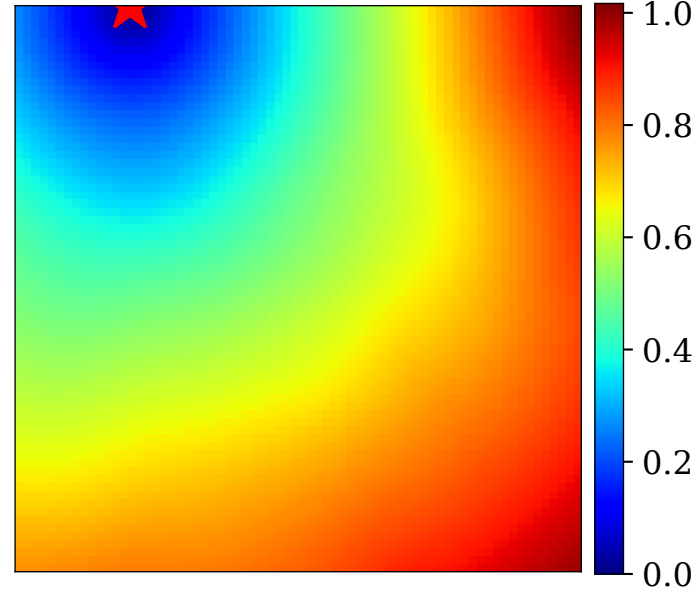

Absolute Error

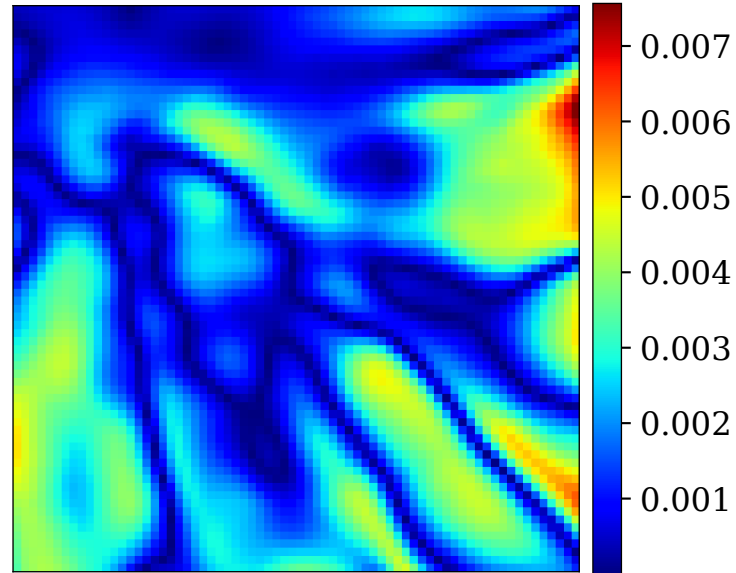

Supplement: supplementary_material [file gt_comp_top_98_(1, 0).pdf › EikonalENF_Jax-clean/experiments/fitting/figures/fwi_style_a/test/gt_comp_top_98_(1, 0).pdf]

Velocity Field

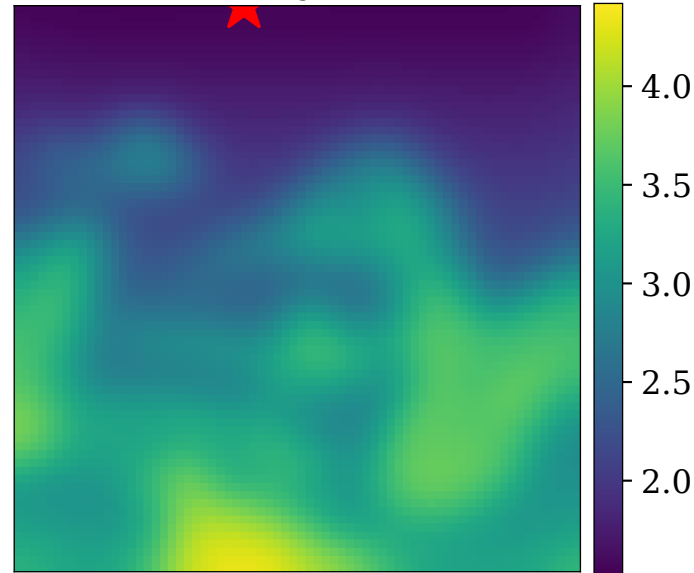

Ground Truth Time

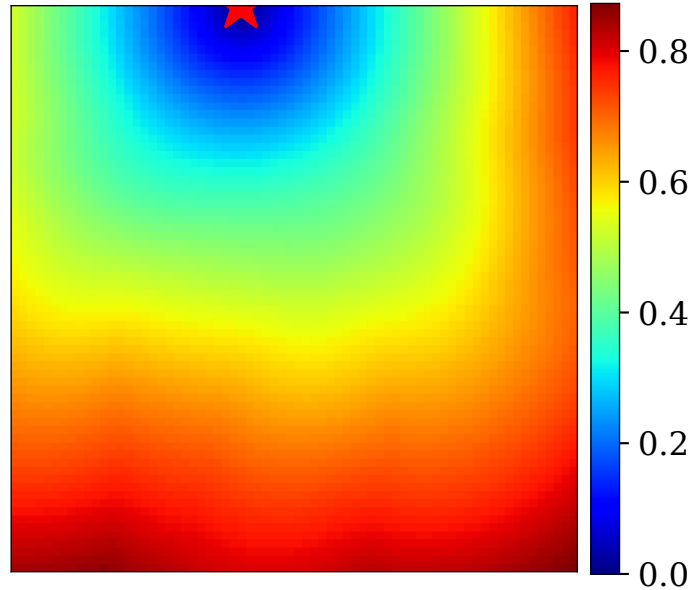

Predicted Time

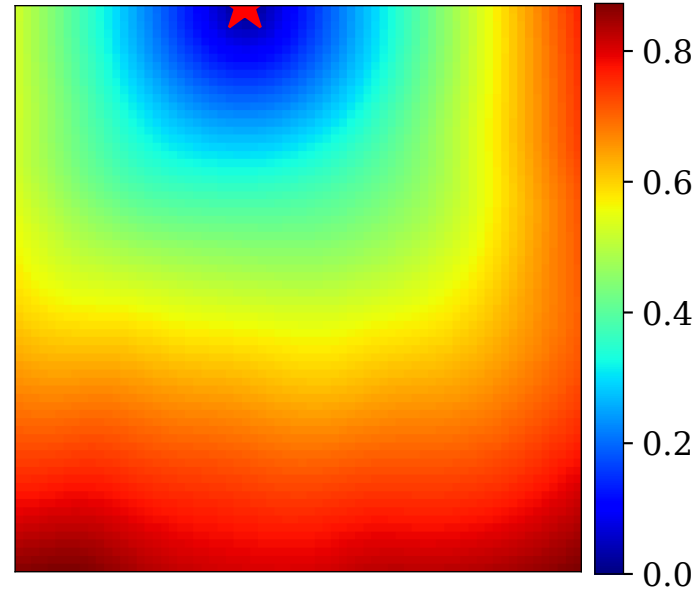

Absolute Error

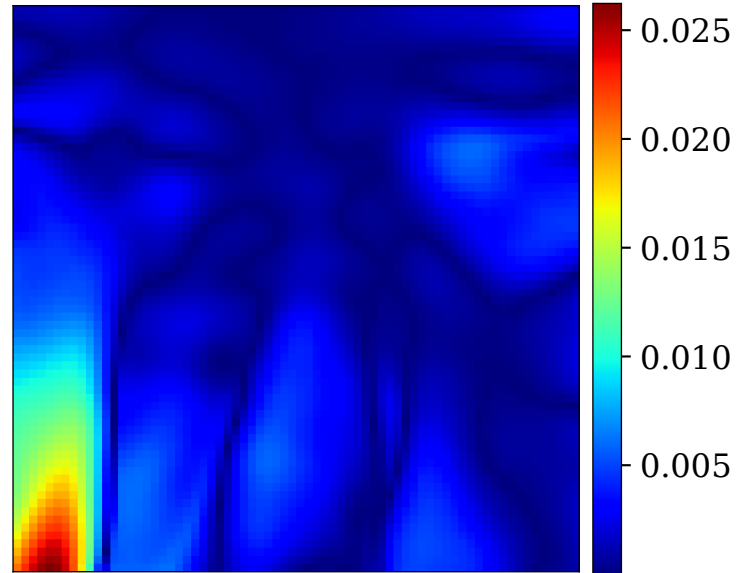

Supplement: supplementary_material [file gt_comp_top_98_(2, 0).pdf › EikonalENF_Jax-clean/experiments/fitting/figures/fwi_style_a/test/gt_comp_top_98_(2, 0).pdf]

Velocity Field

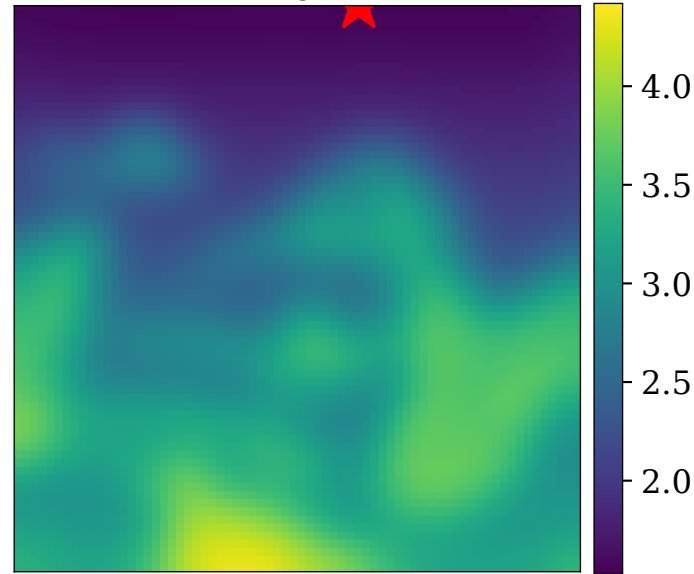

Ground Truth Time

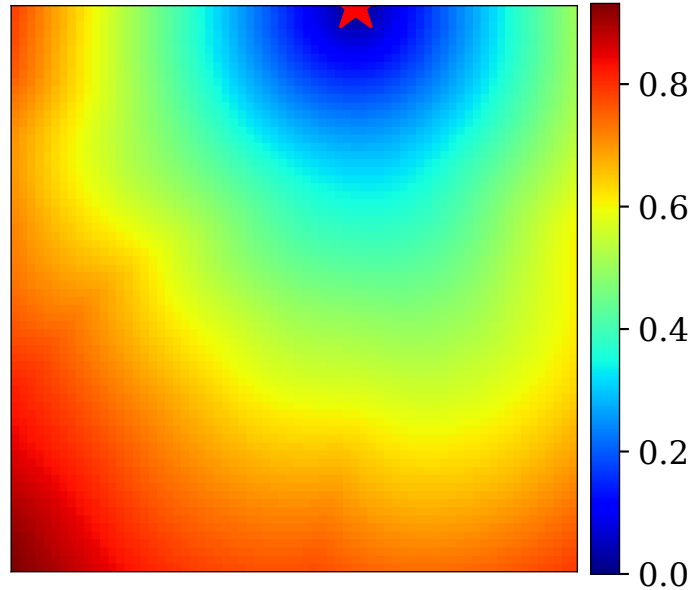

Predicted Time

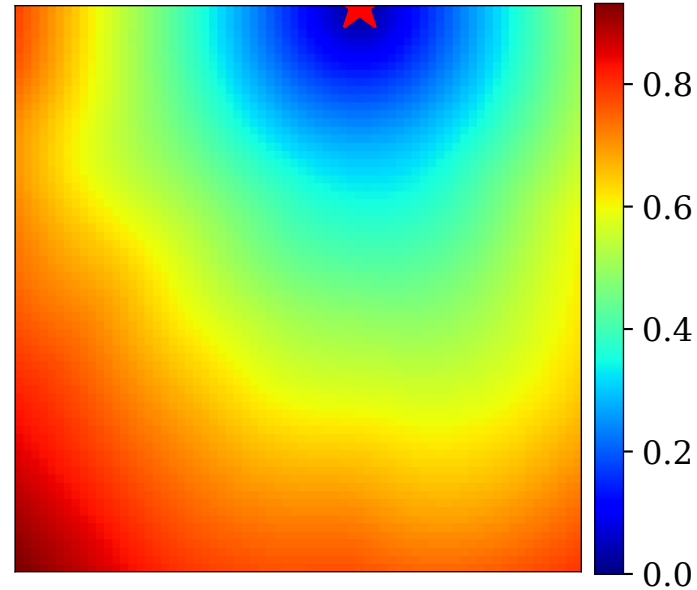

Absolute Error

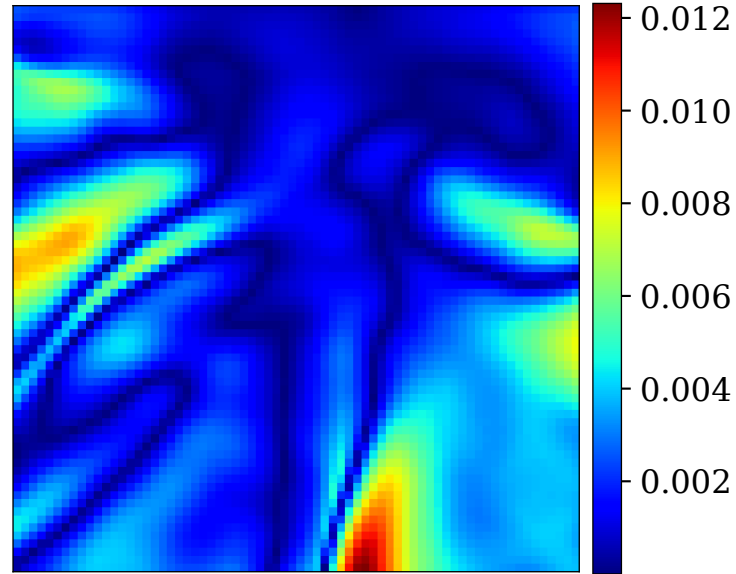

Supplement: supplementary_material [file gt_comp_top_98_(3, 0).pdf › EikonalENF_Jax-clean/experiments/fitting/figures/fwi_style_a/test/gt_comp_top_98_(3, 0).pdf]

Velocity Field

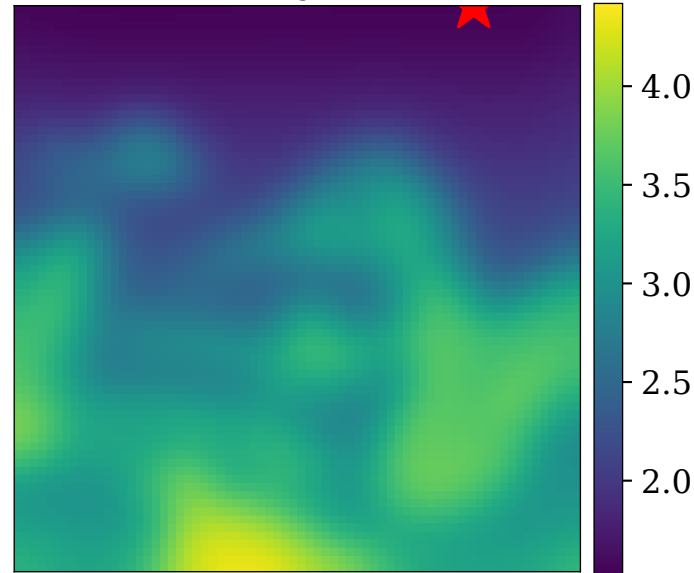

Ground Truth Time

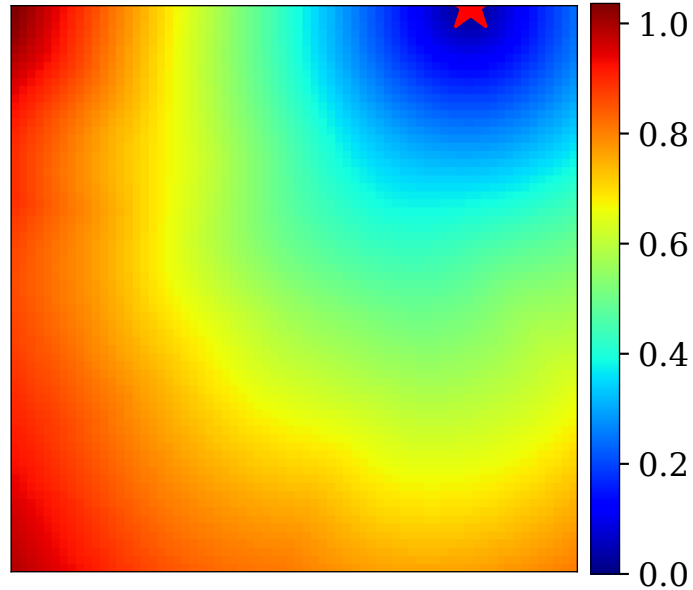

Predicted Time

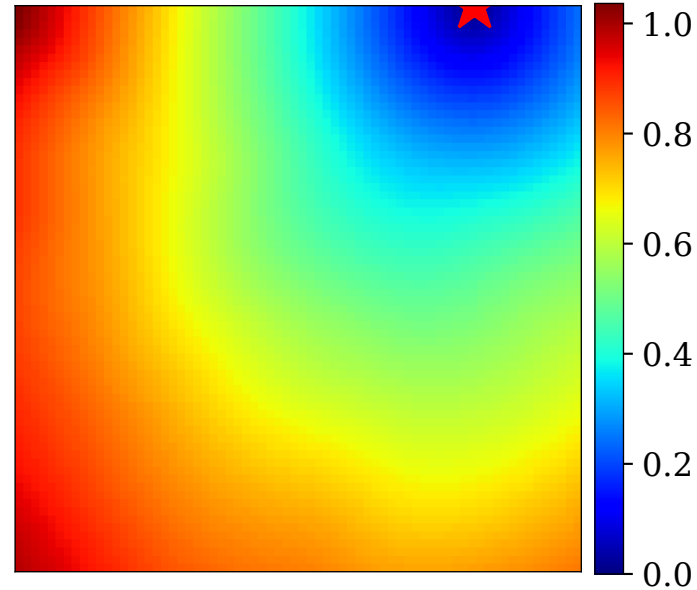

Absolute Error

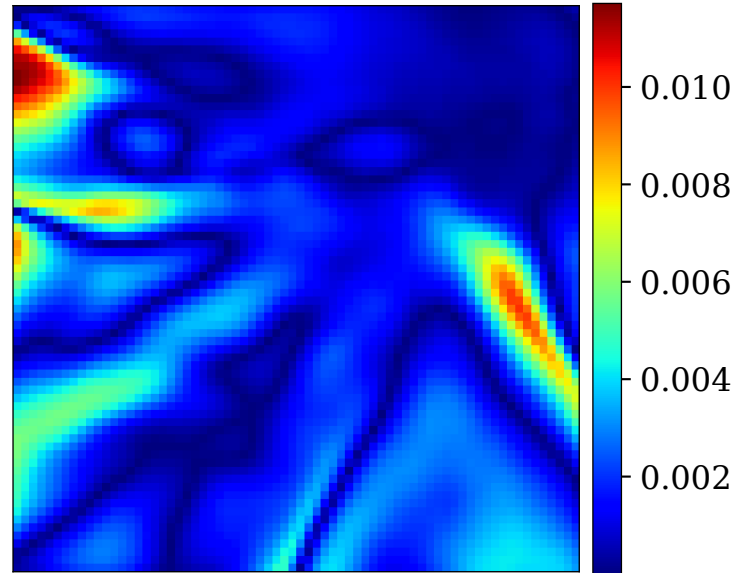

Supplement: supplementary_material [file gt_comp_top_98_(4, 0).pdf › EikonalENF_Jax-clean/experiments/fitting/figures/fwi_style_a/test/gt_comp_top_98_(4, 0).pdf]

Velocity Field

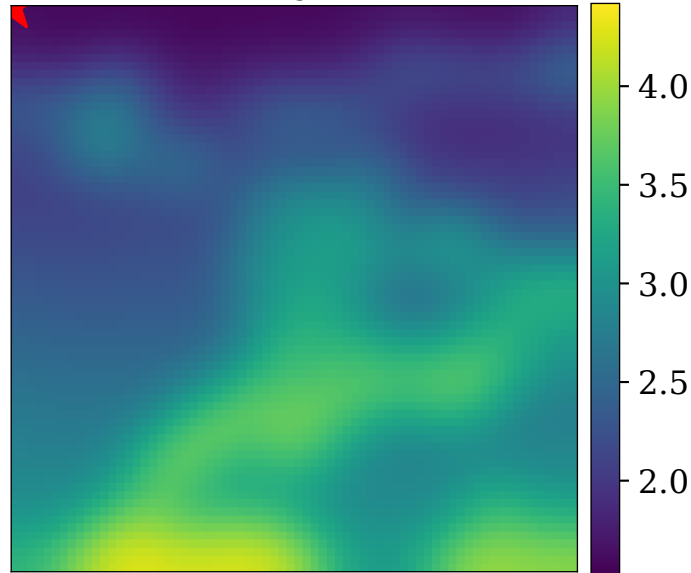

Ground Truth Time

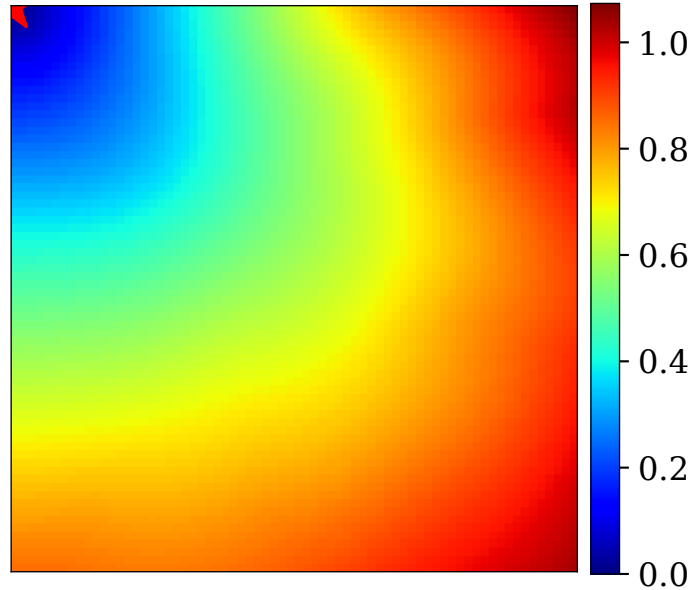

Predicted Time

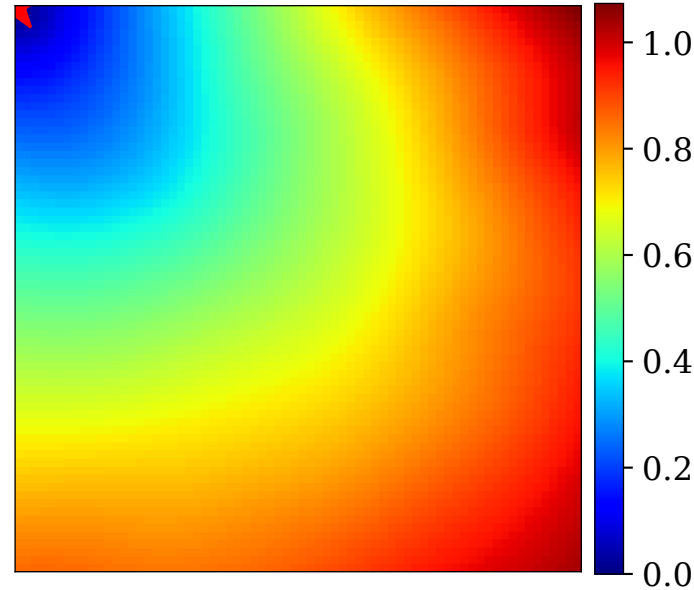

Absolute Error

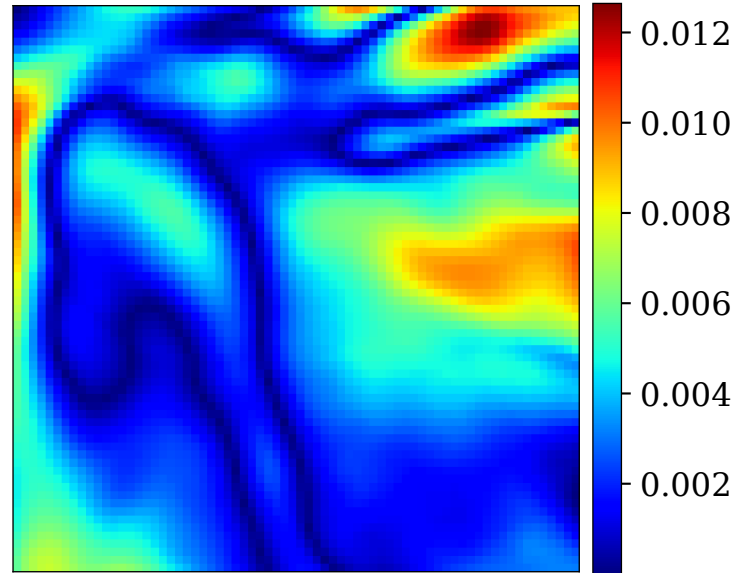

Supplement: supplementary_material [file gt_comp_top_99_(0, 0).pdf › EikonalENF_Jax-clean/experiments/fitting/figures/fwi_style_a/test/gt_comp_top_99_(0, 0).pdf]

Velocity Field

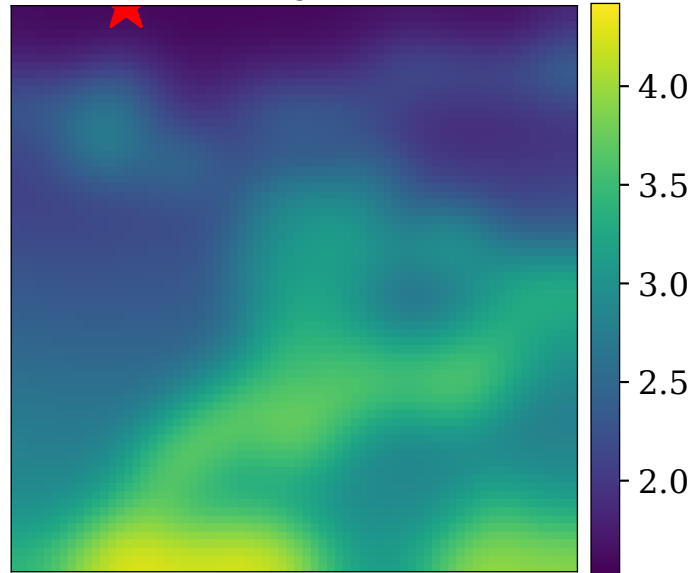

Ground Truth Time

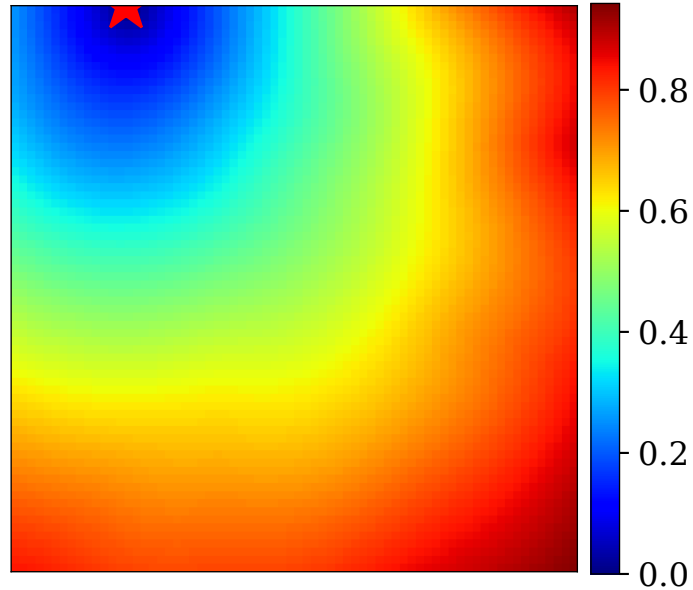

Predicted Time

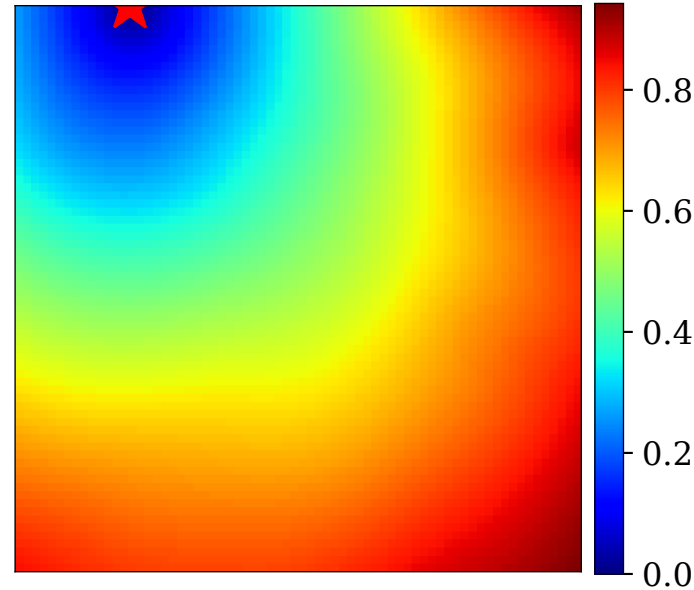

Absolute Error

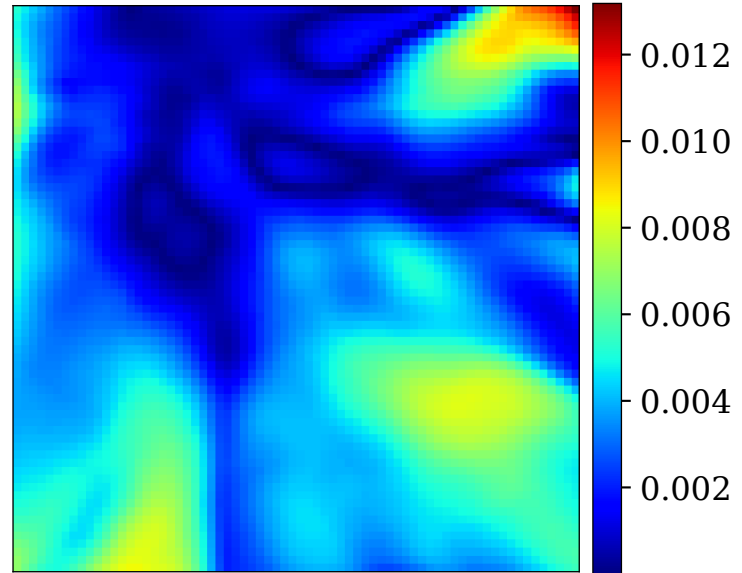

Supplement: supplementary_material [file gt_comp_top_99_(1, 0).pdf › EikonalENF_Jax-clean/experiments/fitting/figures/fwi_style_a/test/gt_comp_top_99_(1, 0).pdf]

Velocity Field

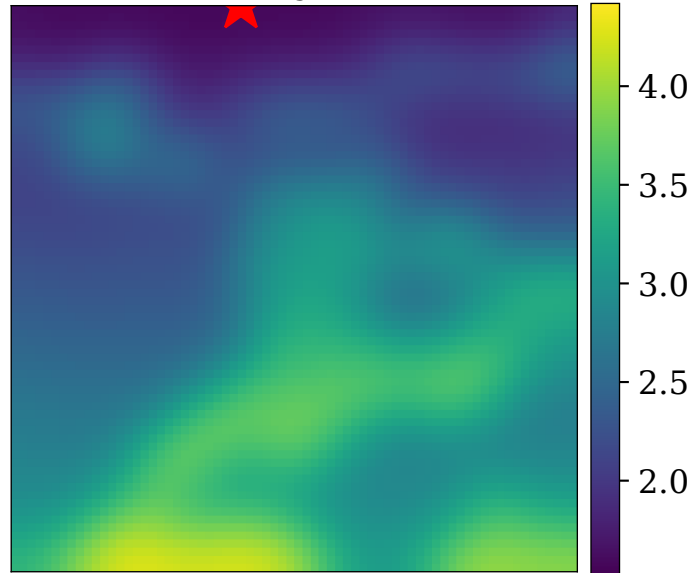

Ground Truth Time

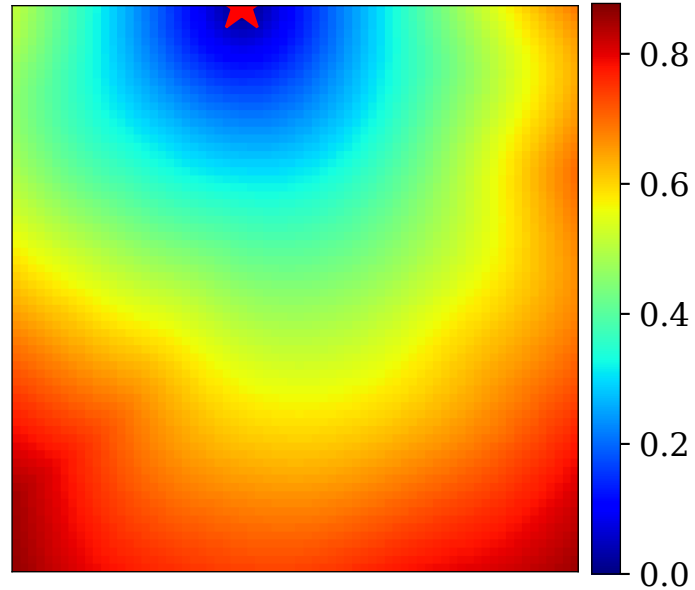

Predicted Time

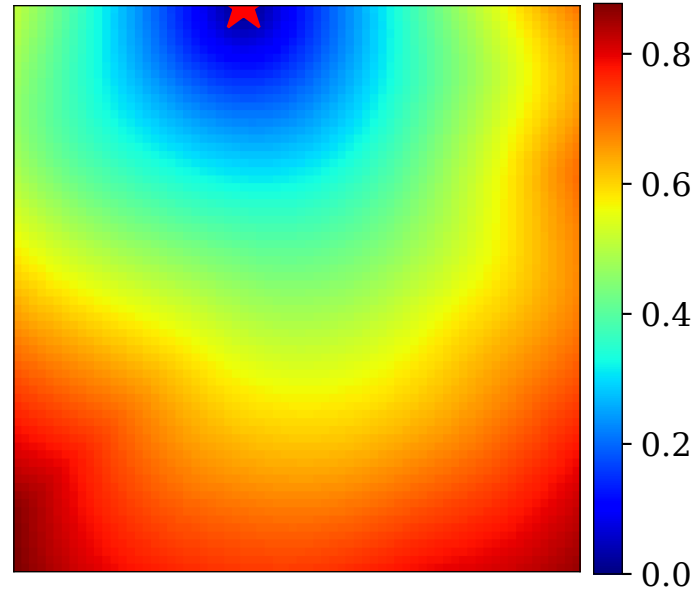

Absolute Error

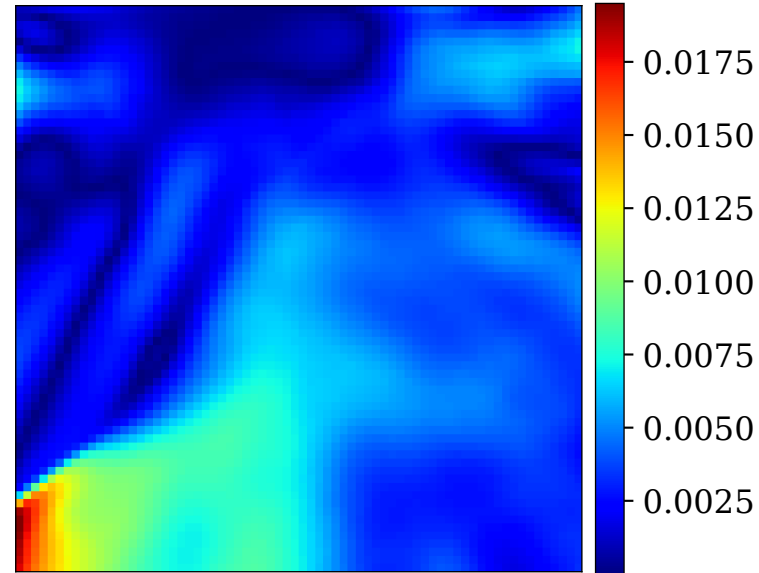

Supplement: supplementary_material [file gt_comp_top_99_(2, 0).pdf › EikonalENF_Jax-clean/experiments/fitting/figures/fwi_style_a/test/gt_comp_top_99_(2, 0).pdf]

Velocity Field

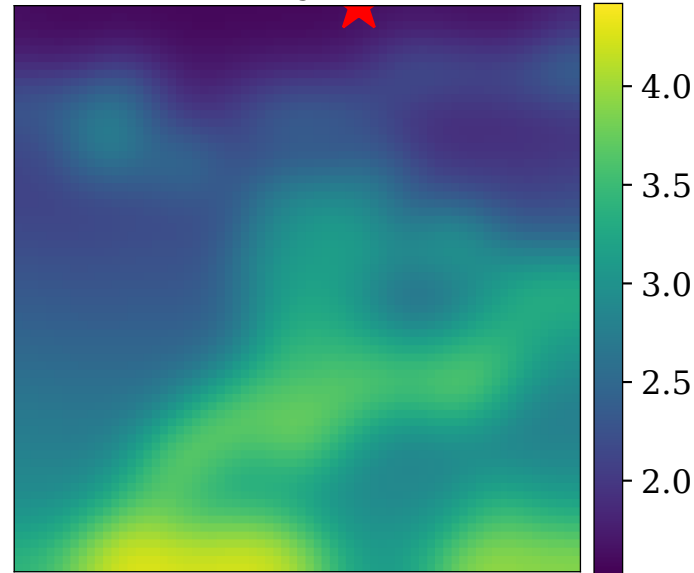

Ground Truth Time

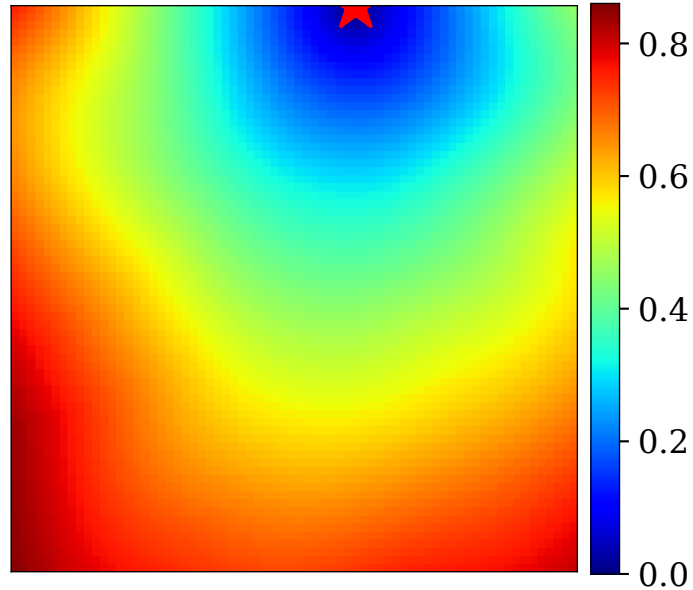

Predicted Time

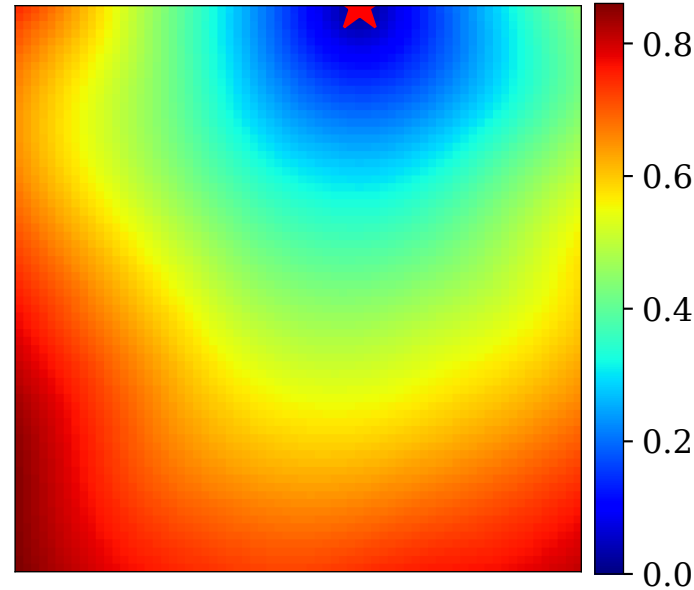

Absolute Error

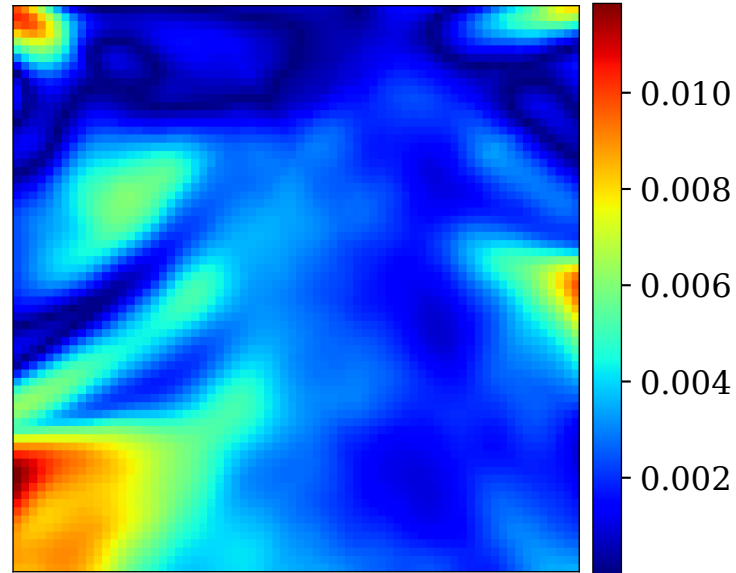

Supplement: supplementary_material [file gt_comp_top_99_(3, 0).pdf › EikonalENF_Jax-clean/experiments/fitting/figures/fwi_style_a/test/gt_comp_top_99_(3, 0).pdf]

Velocity Field

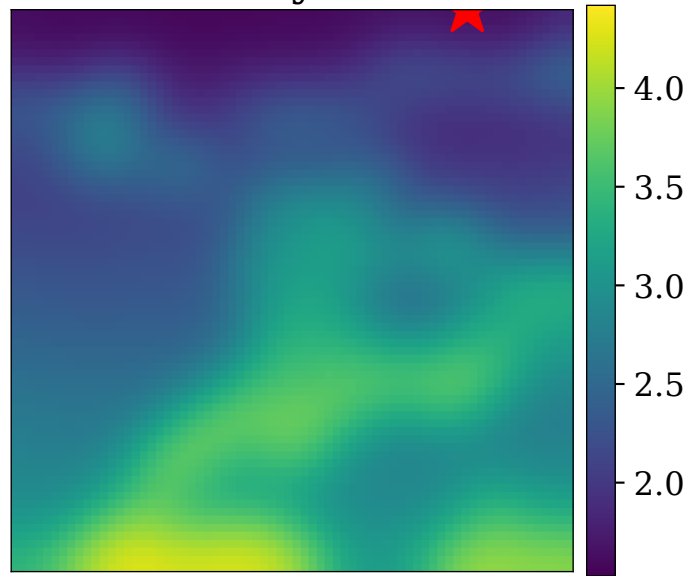

Ground Truth Time

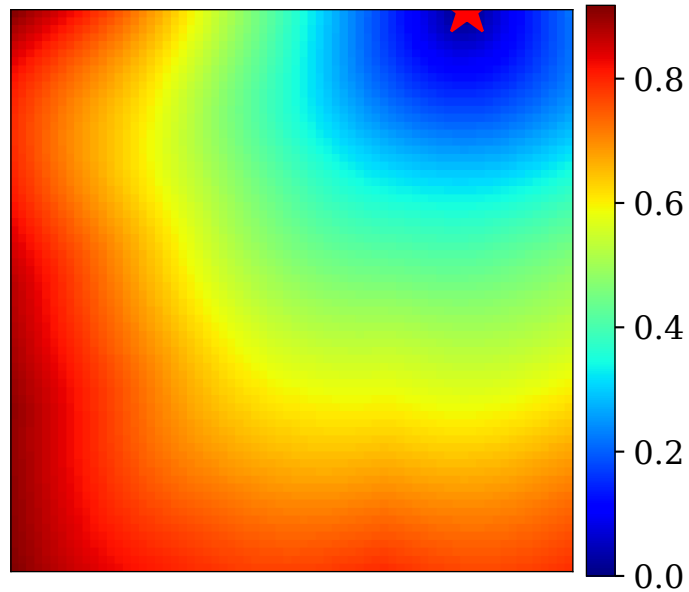

Predicted Time

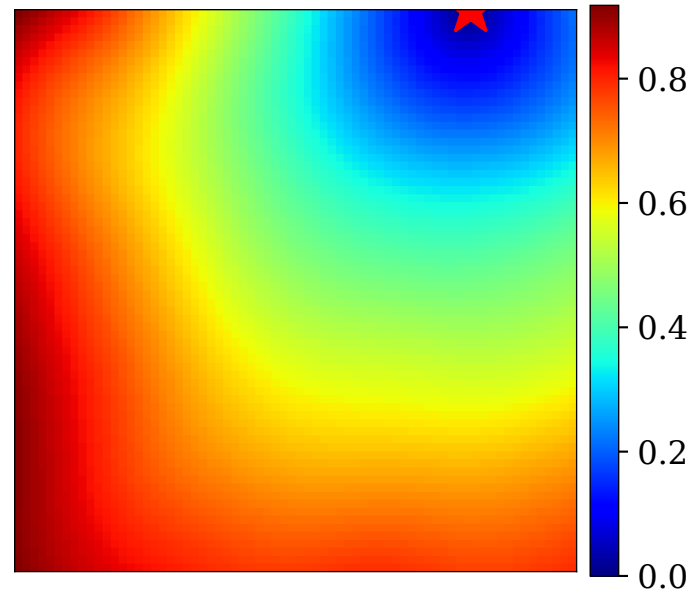

Absolute Error

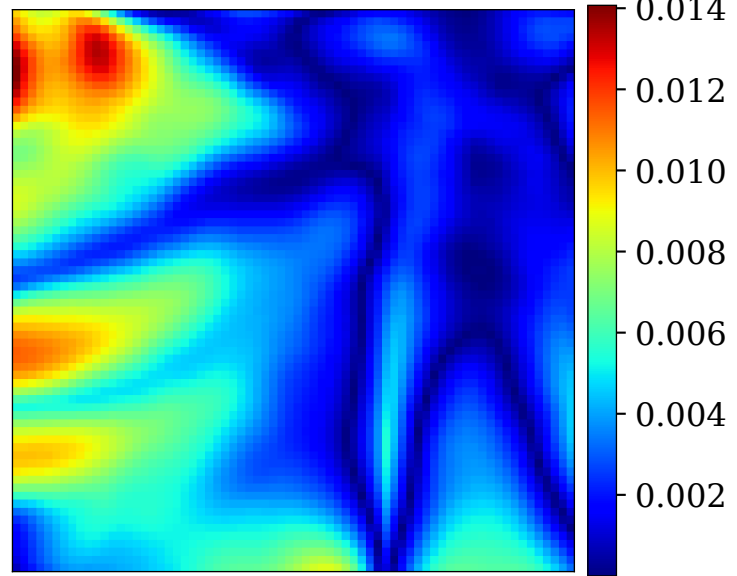

Supplement: supplementary_material [file gt_comp_top_99_(4, 0).pdf › EikonalENF_Jax-clean/experiments/fitting/figures/fwi_style_a/test/gt_comp_top_99_(4, 0).pdf]

Velocity Field

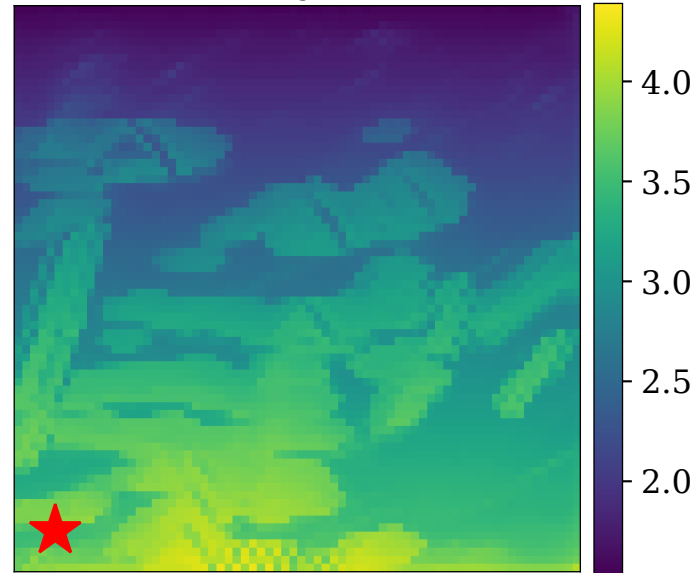

Ground Truth Time

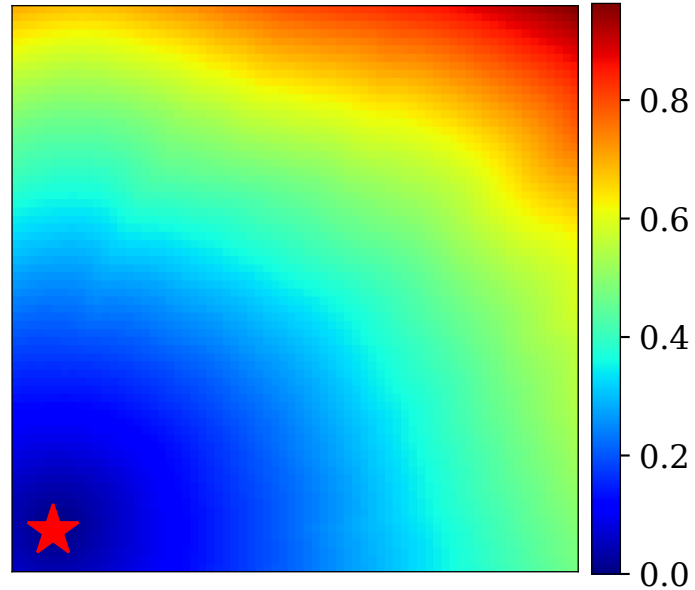

Predicted Time

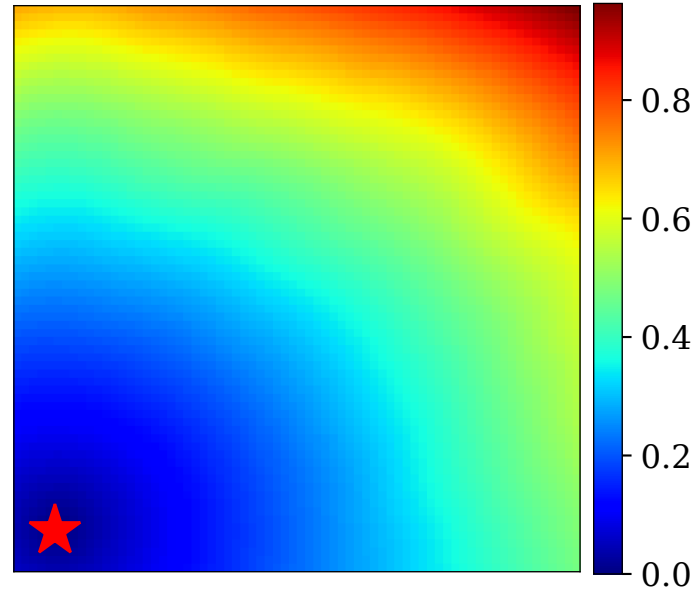

Absolute Error

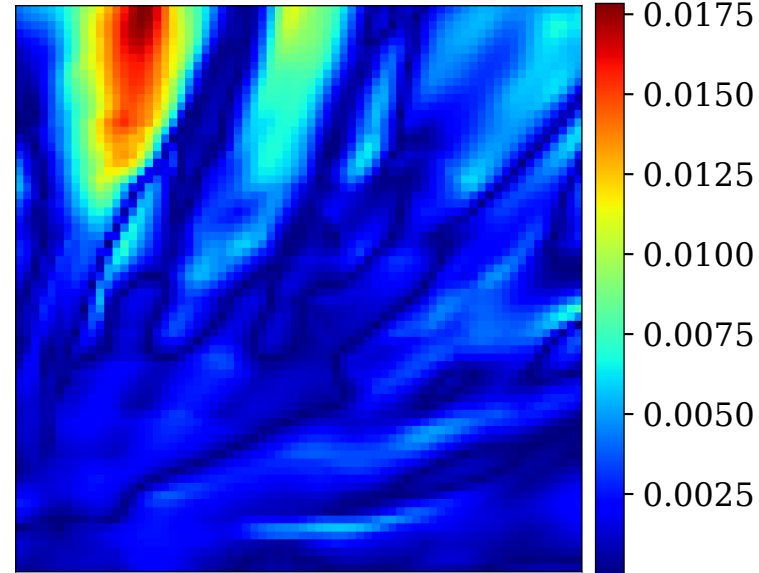

Supplement: supplementary_material [file gt_comp_full_98_(1, 1).pdf › EikonalENF_Jax-clean/experiments/fitting/figures/fwi_style_b/test/gt_comp_full_98_(1, 1).pdf]

Velocity Field

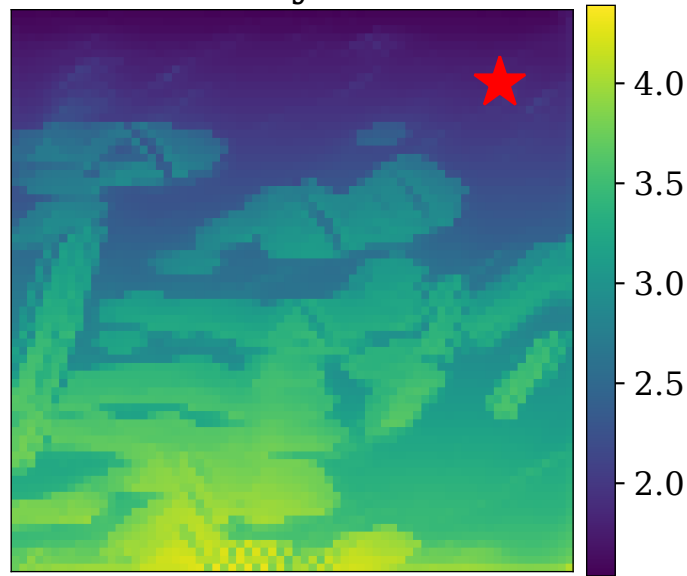

Ground Truth Time

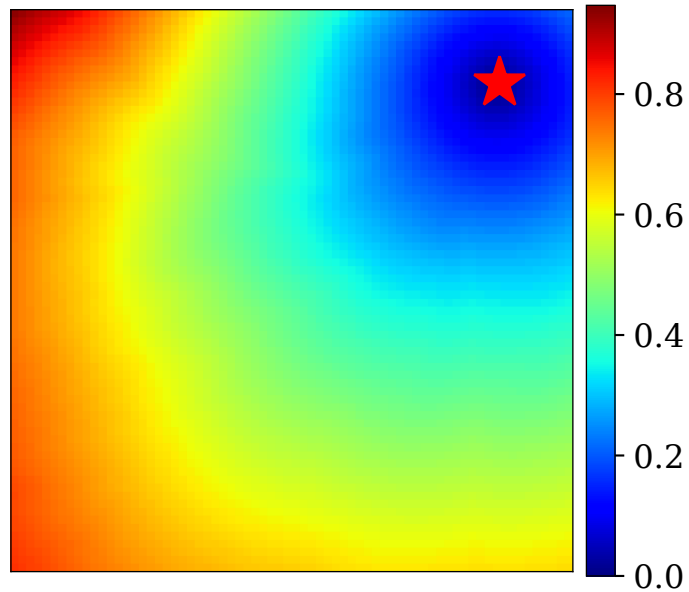

Predicted Time

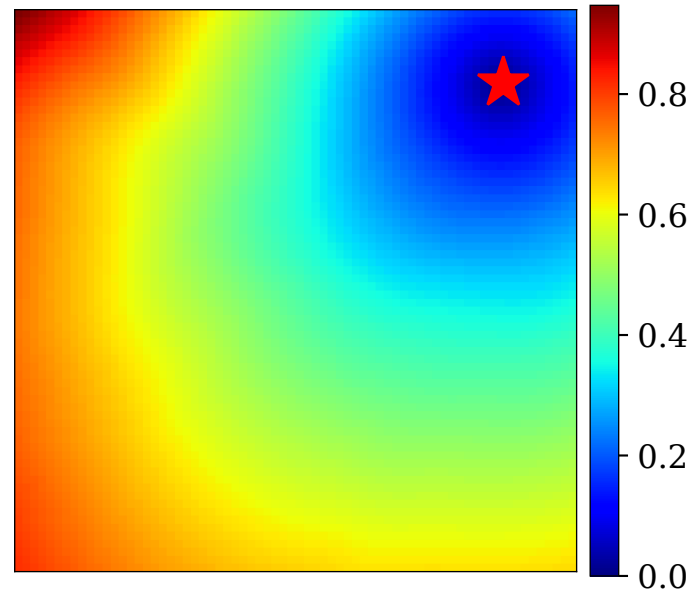

Absolute Error

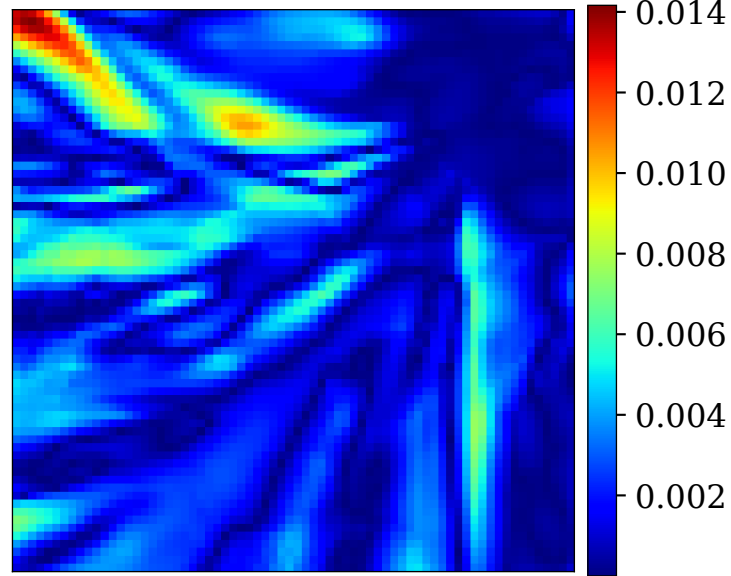

Supplement: supplementary_material [file gt_comp_full_98_(12, 12).pdf › EikonalENF_Jax-clean/experiments/fitting/figures/fwi_style_b/test/gt_comp_full_98_(12, 12).pdf]

Velocity Field

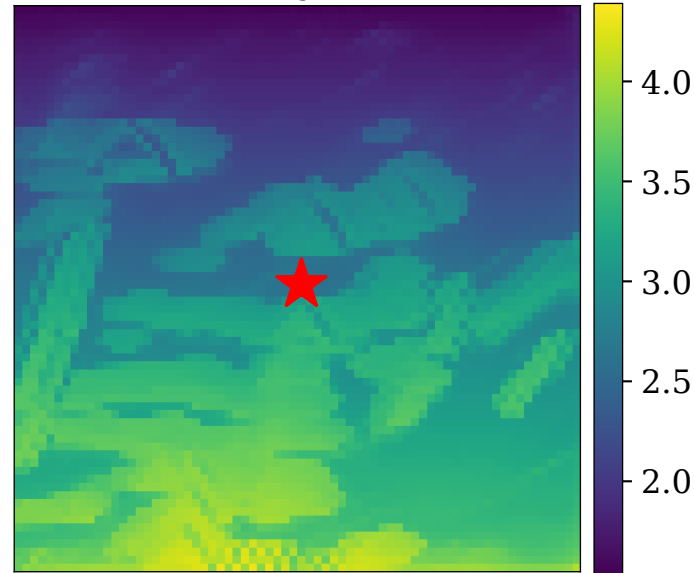

Ground Truth Time

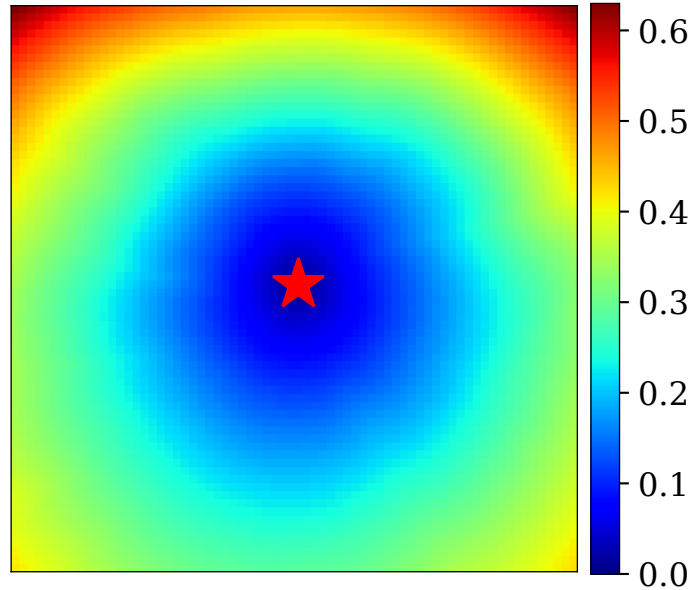

Predicted Time

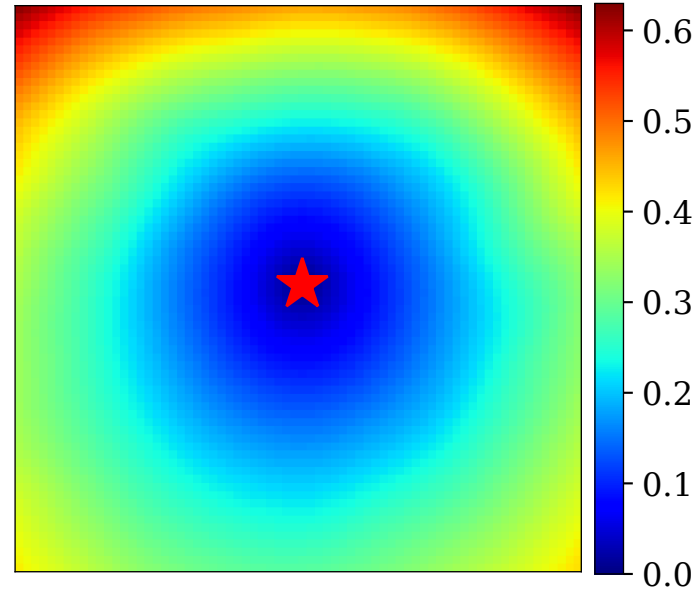

Absolute Error

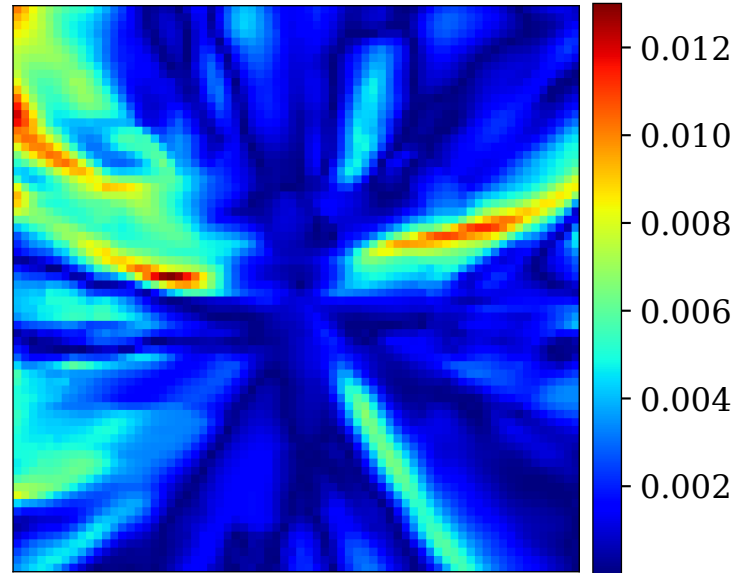

Supplement: supplementary_material [file gt_comp_full_98_(7, 7).pdf › EikonalENF_Jax-clean/experiments/fitting/figures/fwi_style_b/test/gt_comp_full_98_(7, 7).pdf]

Velocity Field

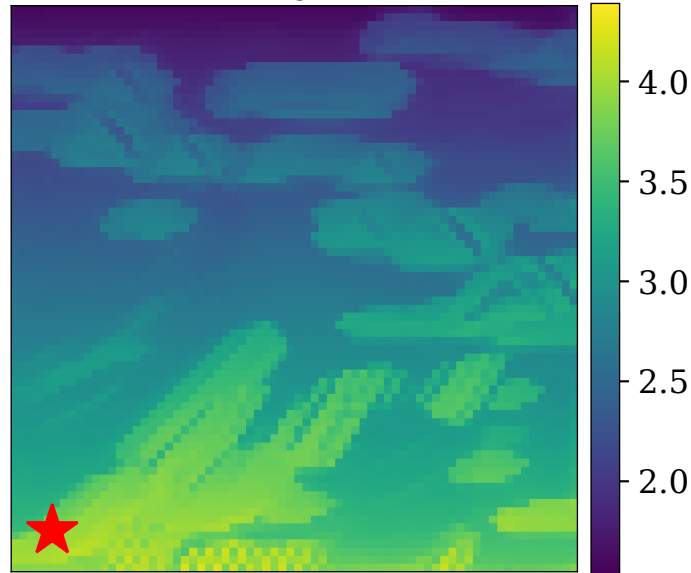

Ground Truth Time

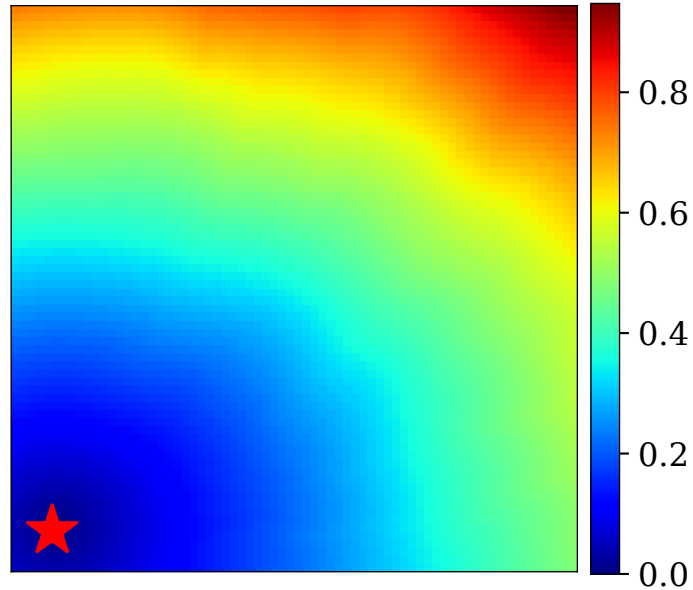

Predicted Time

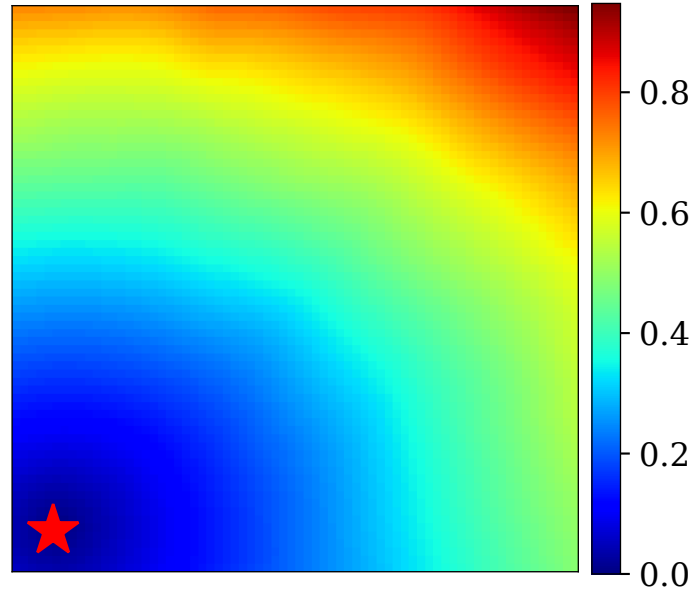

Absolute Error

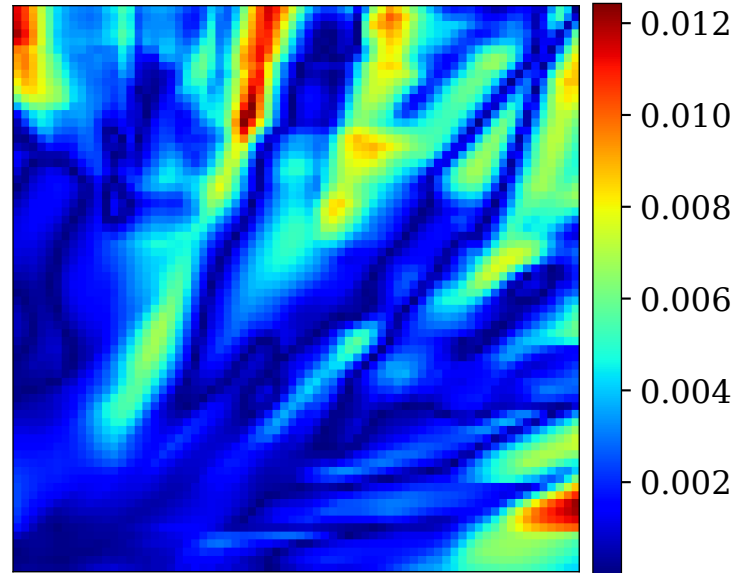

Supplement: supplementary_material [file gt_comp_full_99_(1, 1).pdf › EikonalENF_Jax-clean/experiments/fitting/figures/fwi_style_b/test/gt_comp_full_99_(1, 1).pdf]

Velocity Field

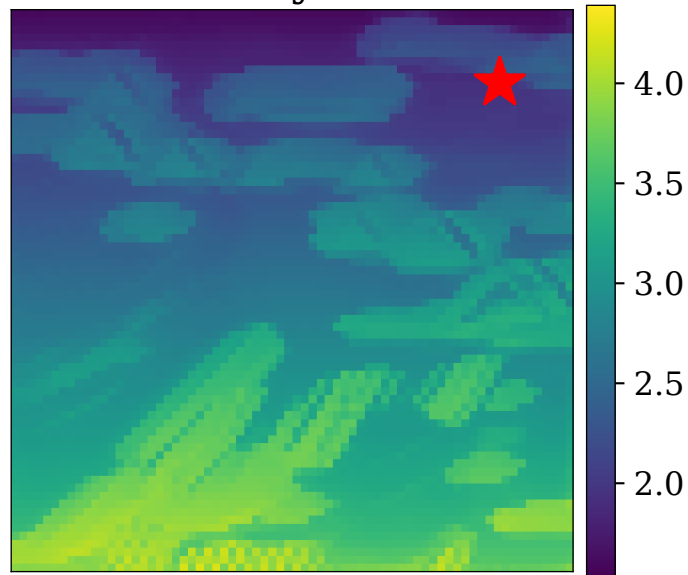

Ground Truth Time

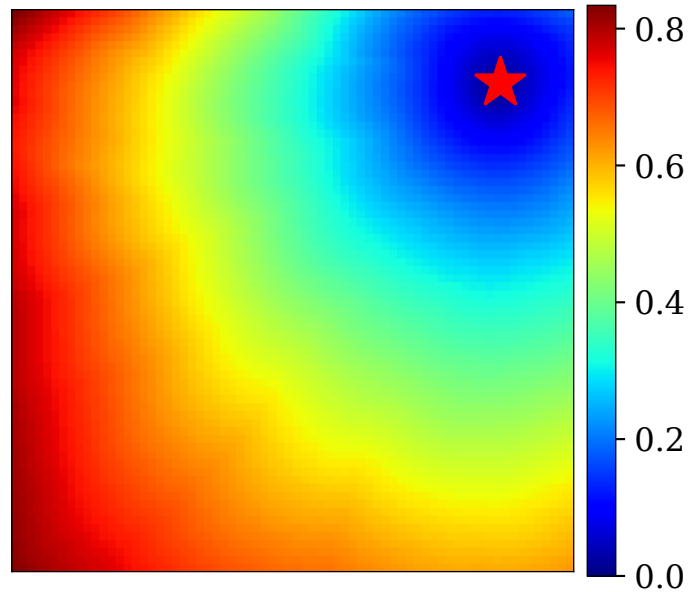

Predicted Time

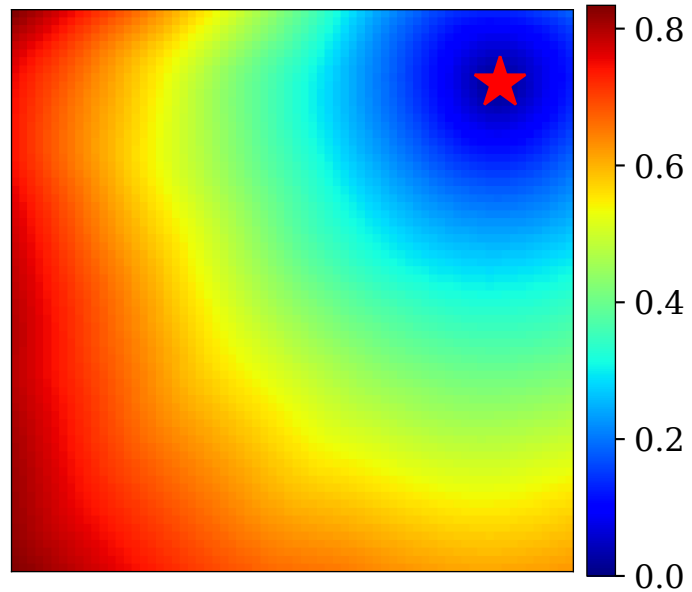

Absolute Error

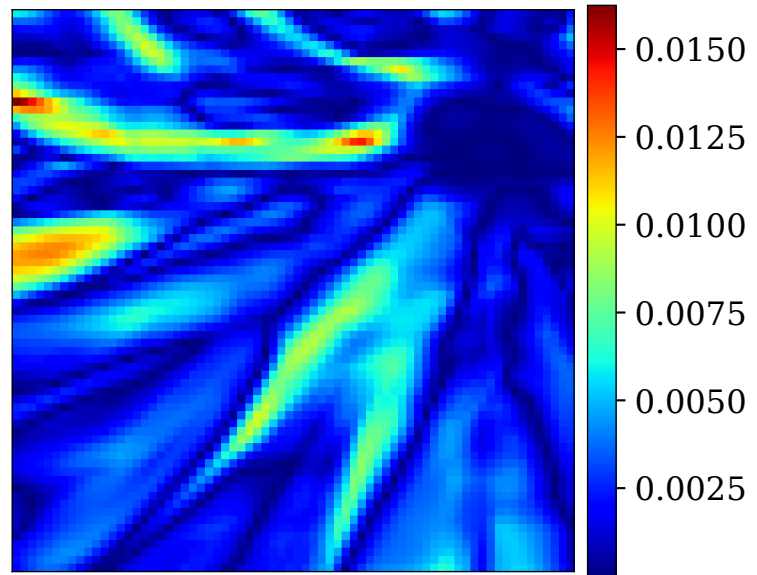

Supplement: supplementary_material [file gt_comp_full_99_(12, 12).pdf › EikonalENF_Jax-clean/experiments/fitting/figures/fwi_style_b/test/gt_comp_full_99_(12, 12).pdf]

Velocity Field

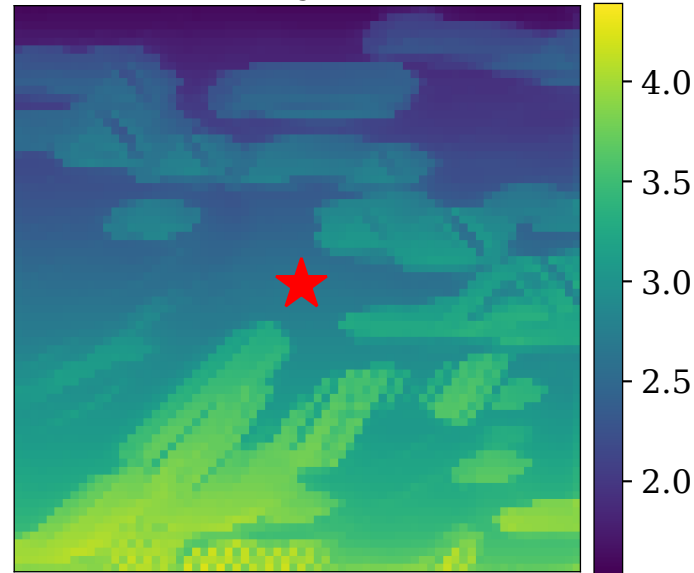

Ground Truth Time

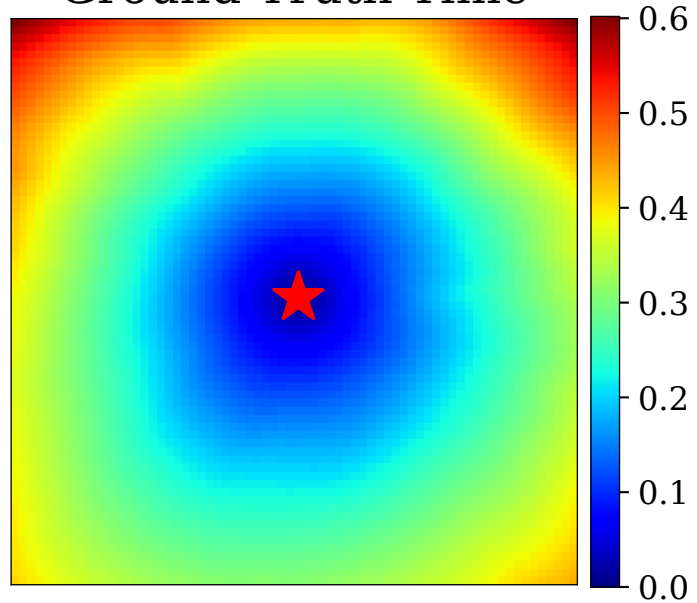

Predicted Time

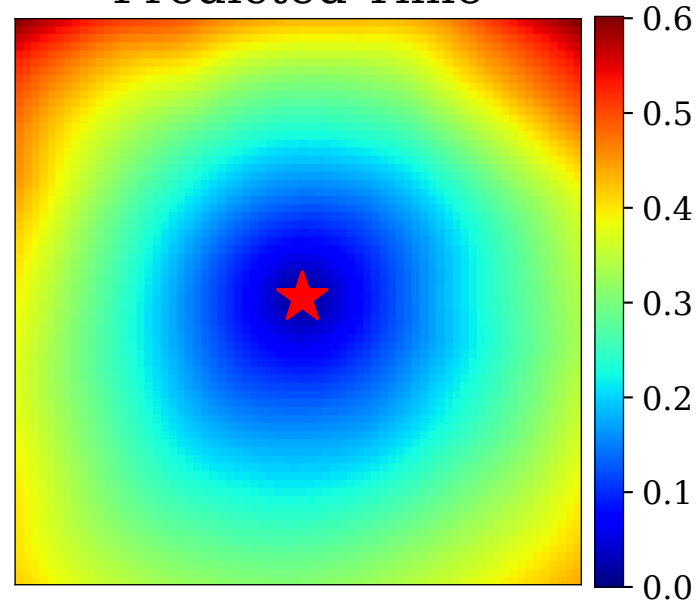

Absolute Error

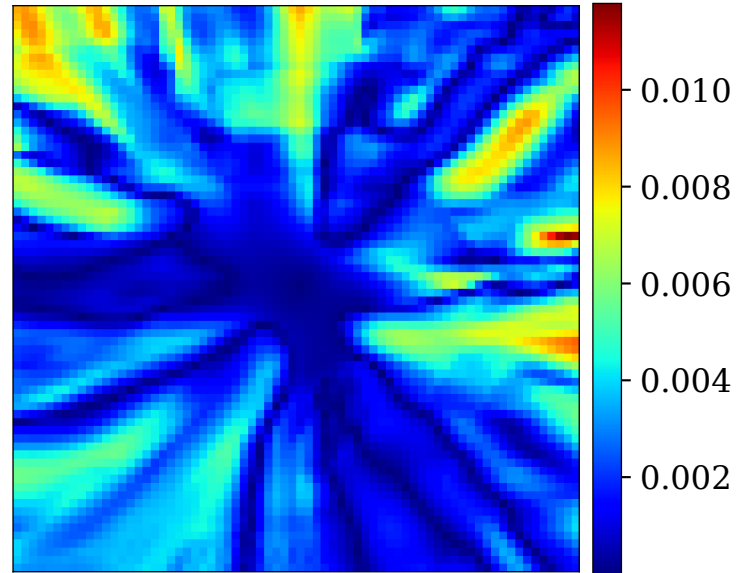

Supplement: supplementary_material [file gt_comp_full_99_(7, 7).pdf › EikonalENF_Jax-clean/experiments/fitting/figures/fwi_style_b/test/gt_comp_full_99_(7, 7).pdf]

Velocity Field

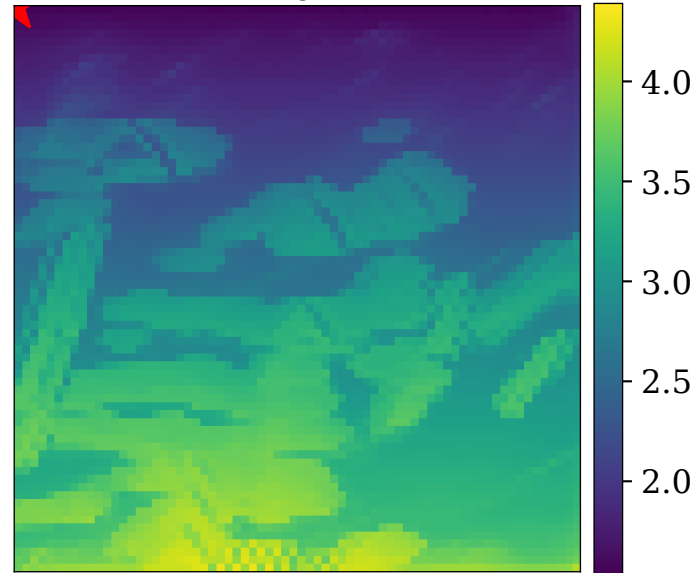

Ground Truth Time

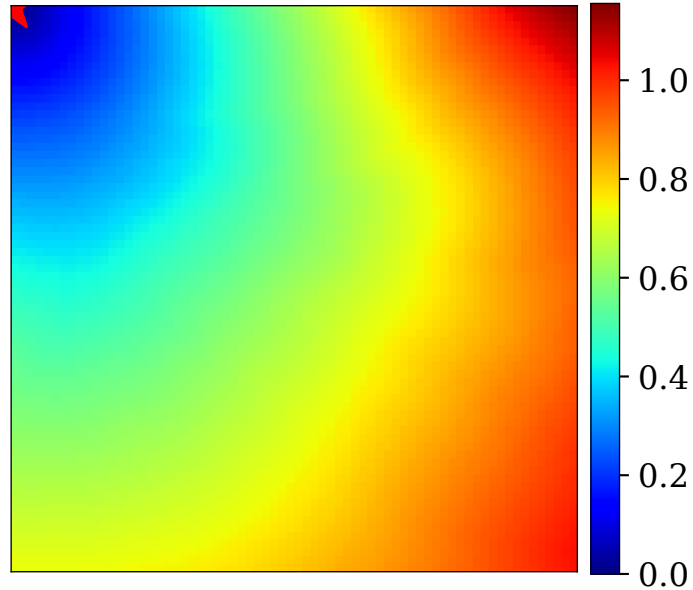

Predicted Time

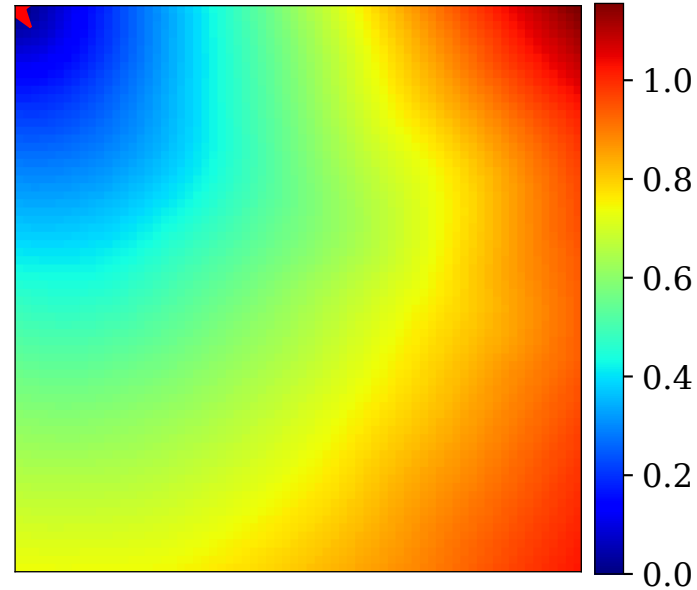

Absolute Error

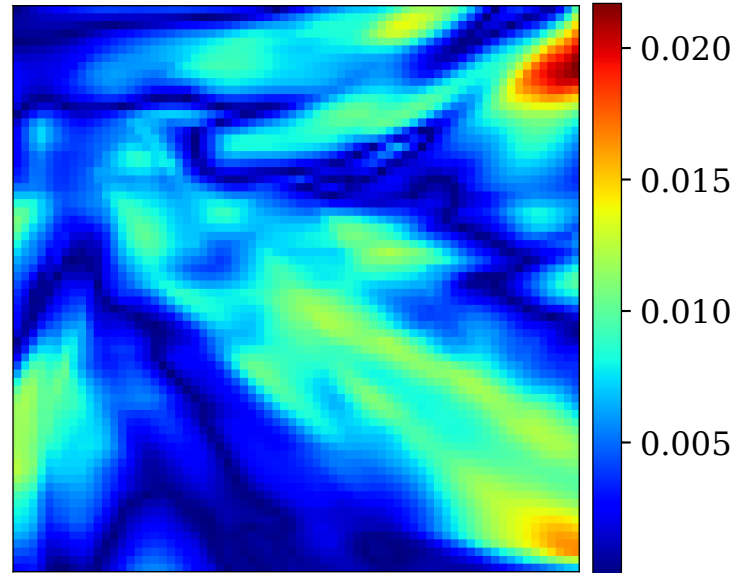

Supplement: supplementary_material [file gt_comp_top_98_(0, 0).pdf › EikonalENF_Jax-clean/experiments/fitting/figures/fwi_style_b/test/gt_comp_top_98_(0, 0).pdf]

Velocity Field

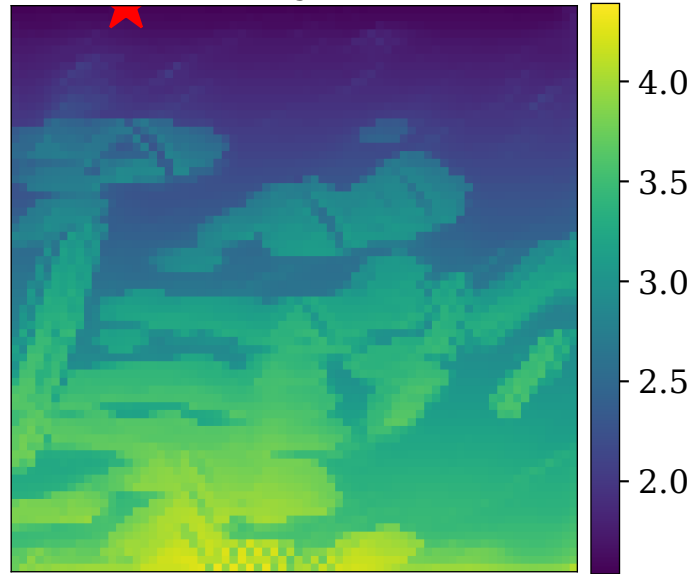

Ground Truth Time

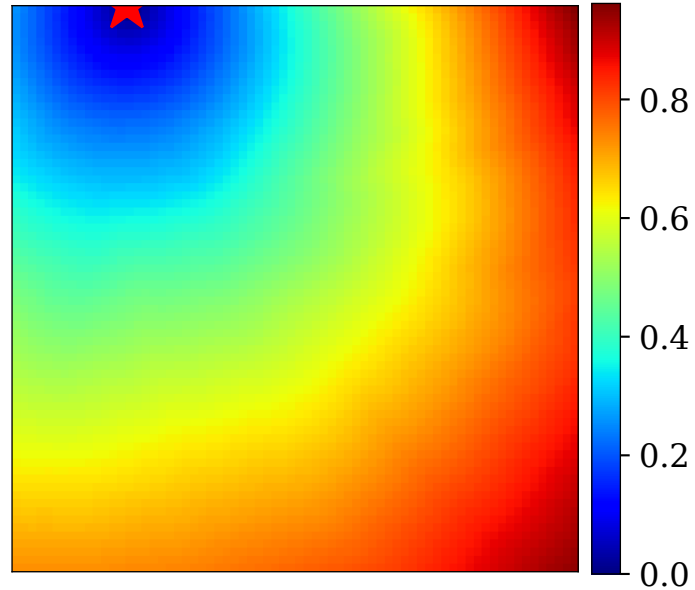

Predicted Time

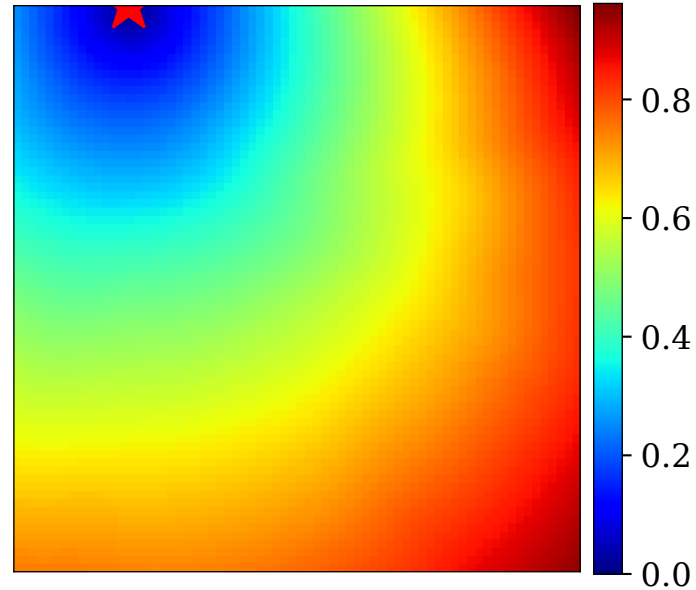

Absolute Error

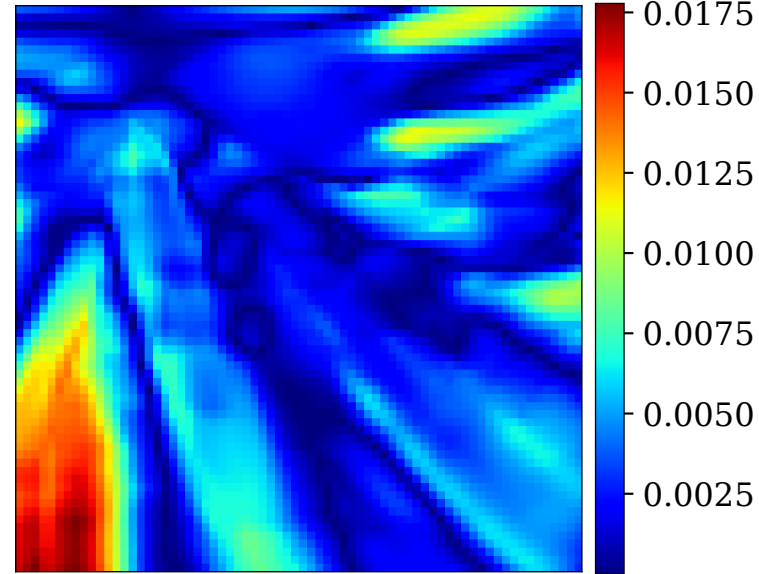

Supplement: supplementary_material [file gt_comp_top_98_(1, 0).pdf › EikonalENF_Jax-clean/experiments/fitting/figures/fwi_style_b/test/gt_comp_top_98_(1, 0).pdf]

Velocity Field

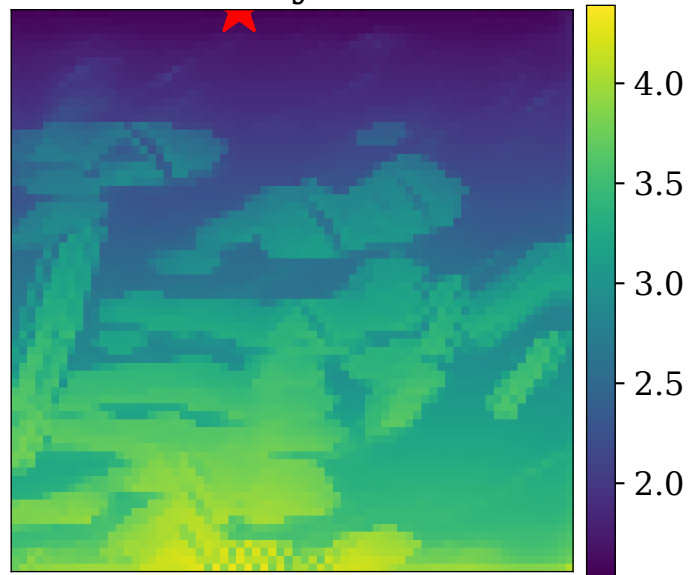

Ground Truth Time

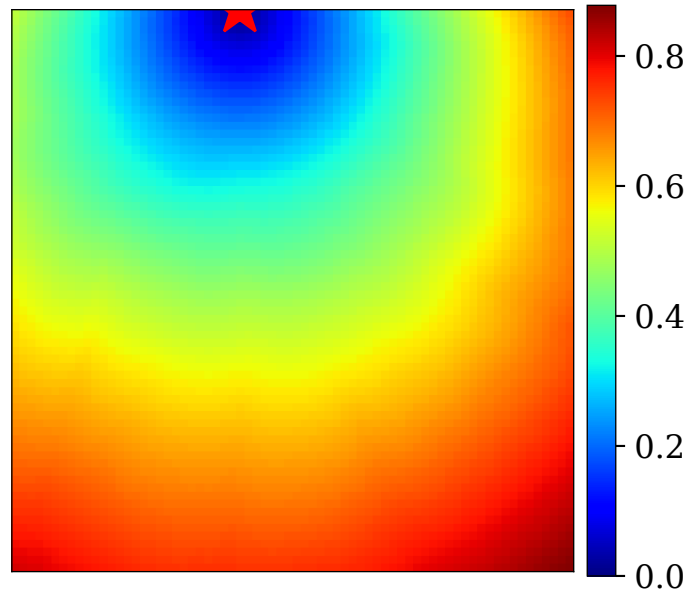

Predicted Time

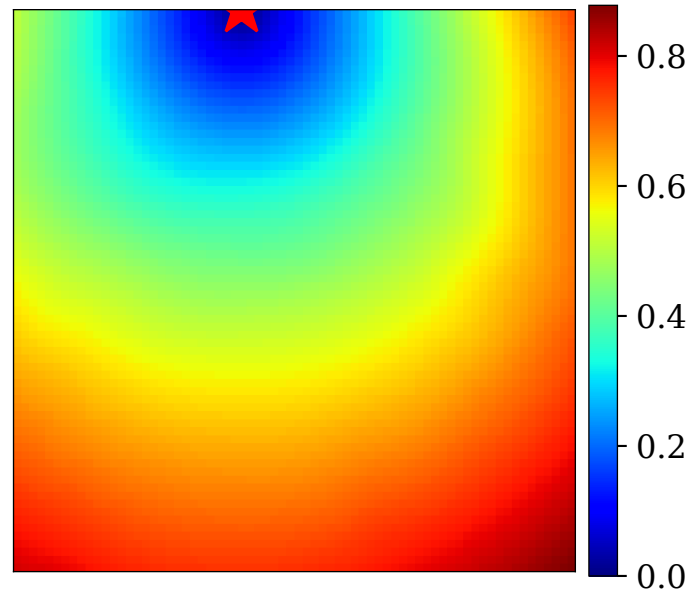

Absolute Error

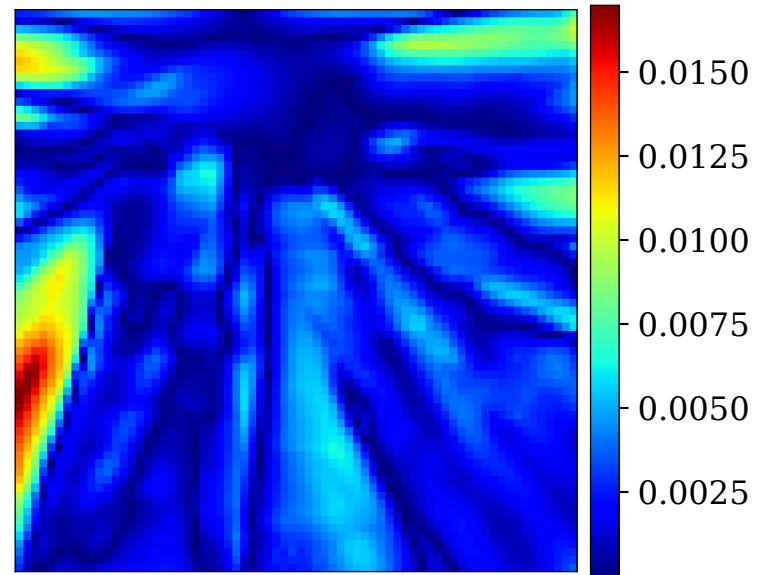

Supplement: supplementary_material [file gt_comp_top_98_(2, 0).pdf › EikonalENF_Jax-clean/experiments/fitting/figures/fwi_style_b/test/gt_comp_top_98_(2, 0).pdf]

Velocity Field

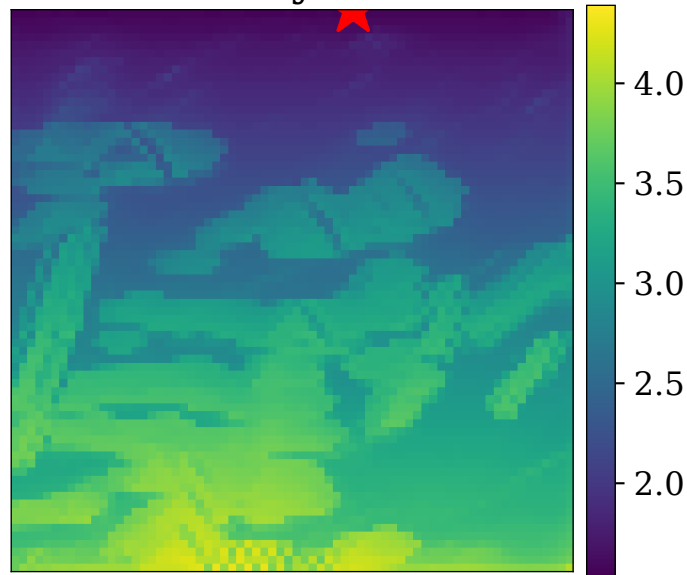

Ground Truth Time

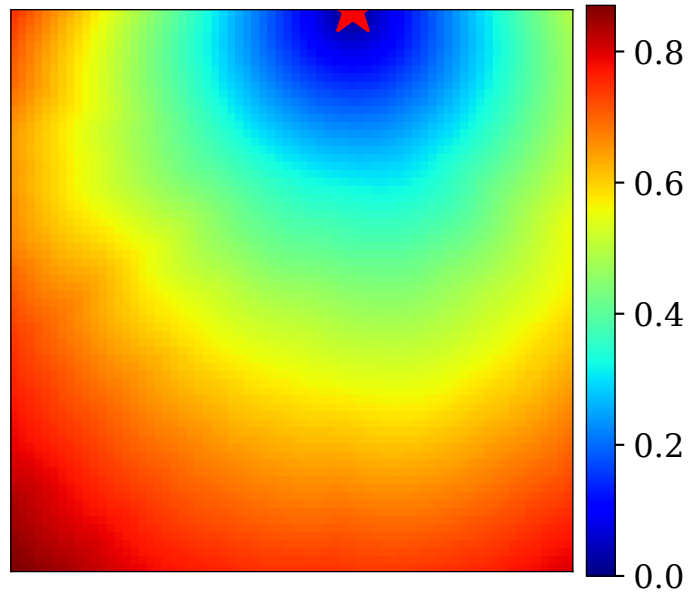

Predicted Time

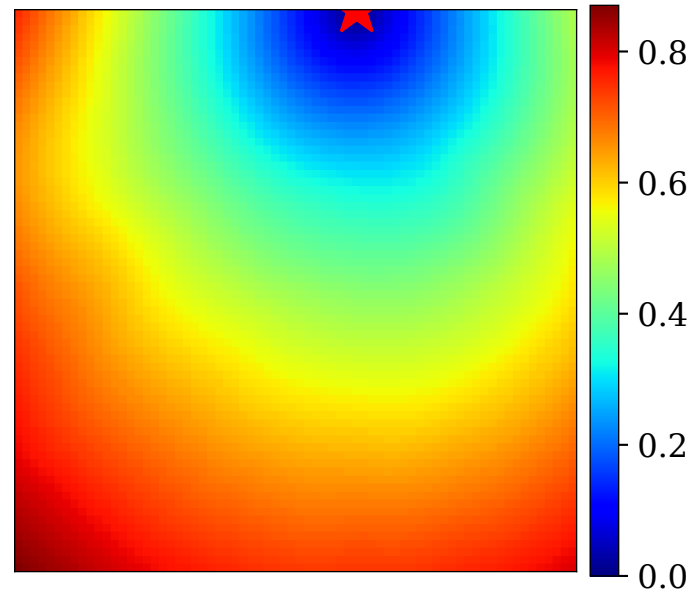

Absolute Error

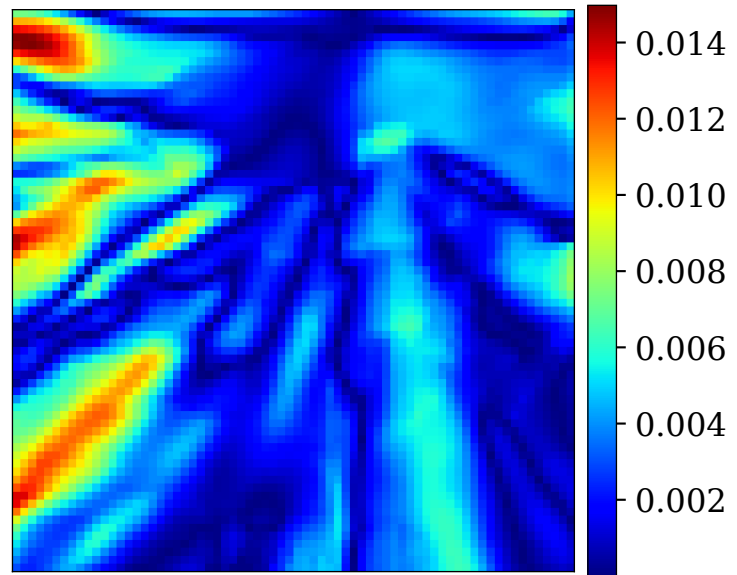

Supplement: supplementary_material [file gt_comp_top_98_(3, 0).pdf › EikonalENF_Jax-clean/experiments/fitting/figures/fwi_style_b/test/gt_comp_top_98_(3, 0).pdf]

Velocity Field

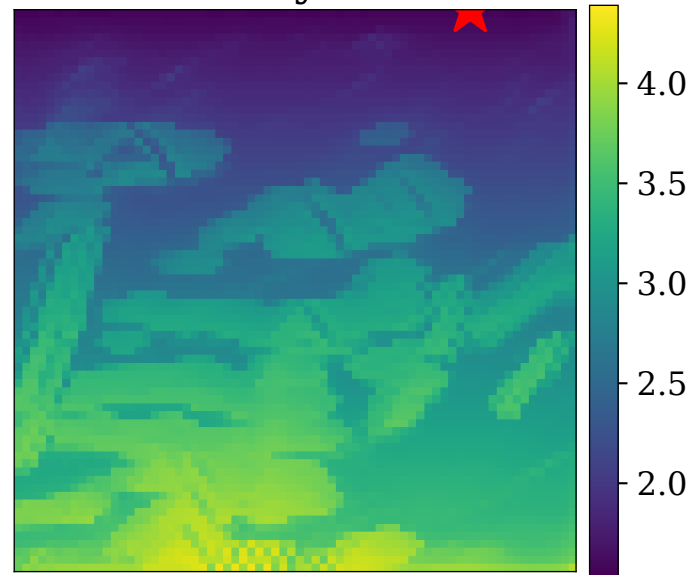

Ground Truth Time

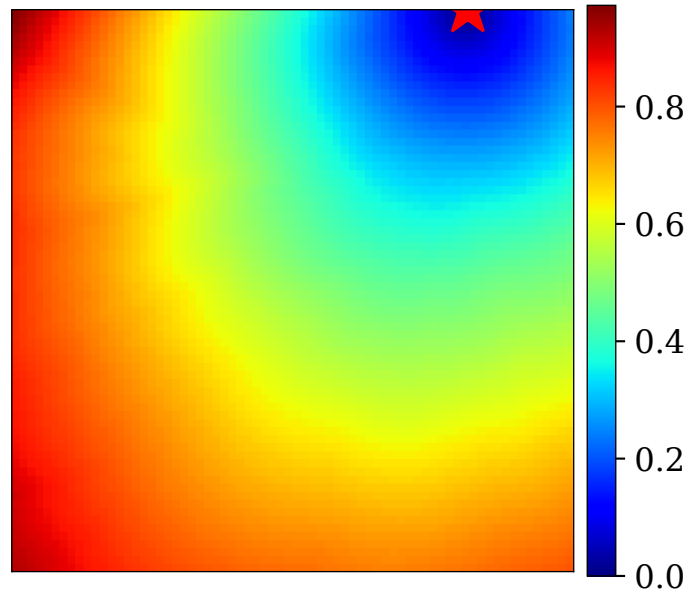

Predicted Time

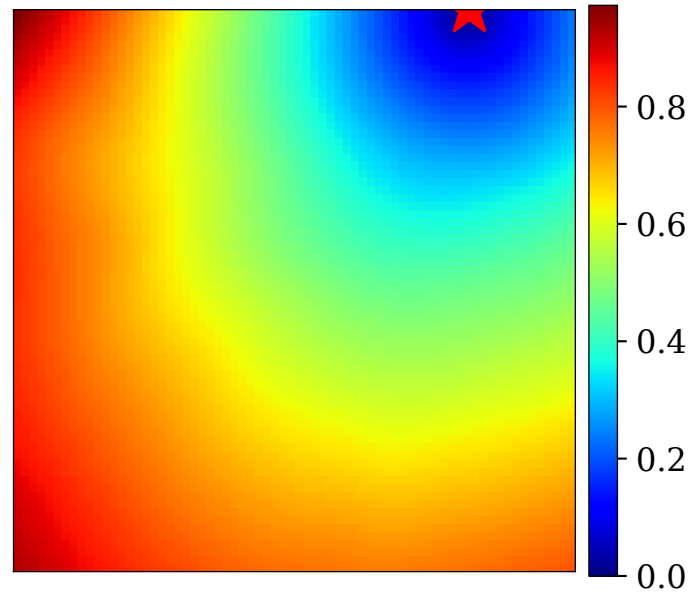

Absolute Error

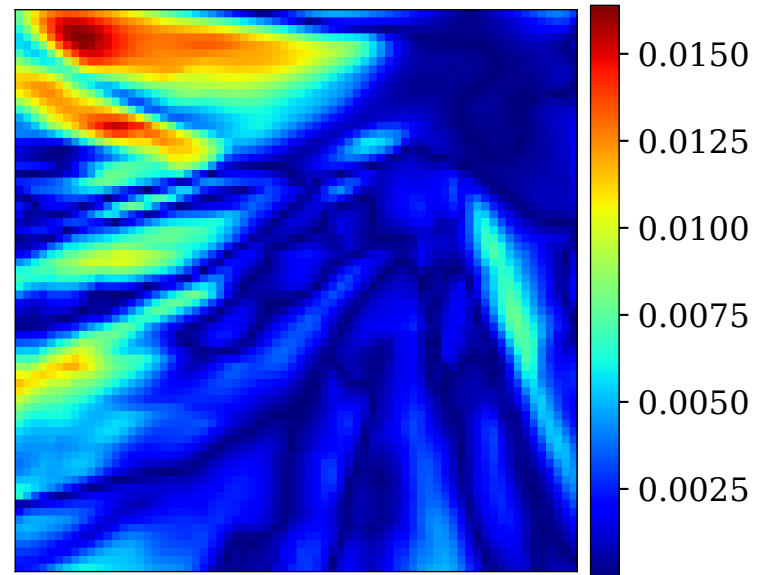

Supplement: supplementary_material [file gt_comp_top_98_(4, 0).pdf › EikonalENF_Jax-clean/experiments/fitting/figures/fwi_style_b/test/gt_comp_top_98_(4, 0).pdf]

Velocity Field

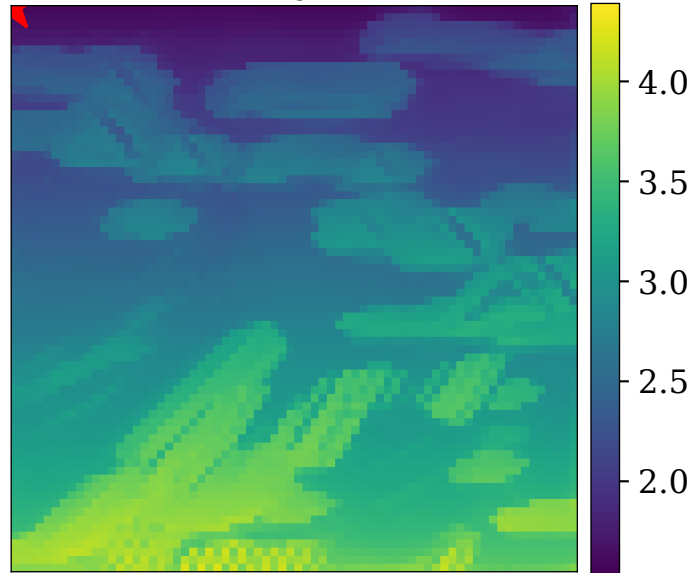

Ground Truth Time

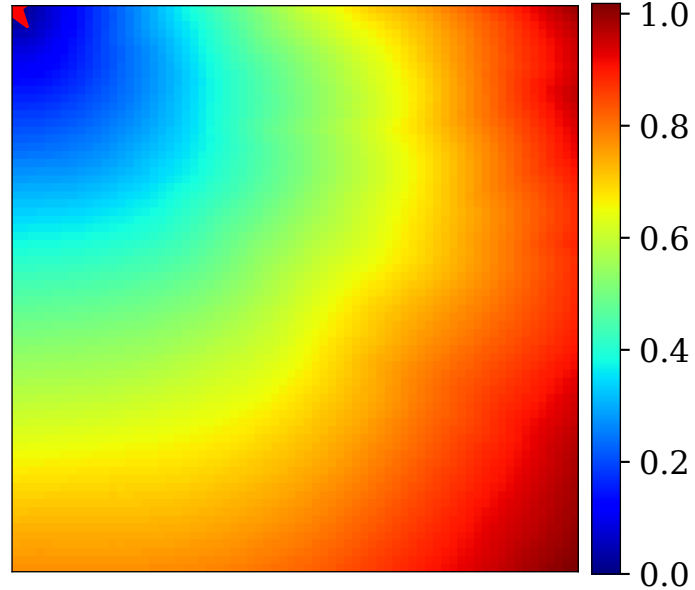

Predicted Time

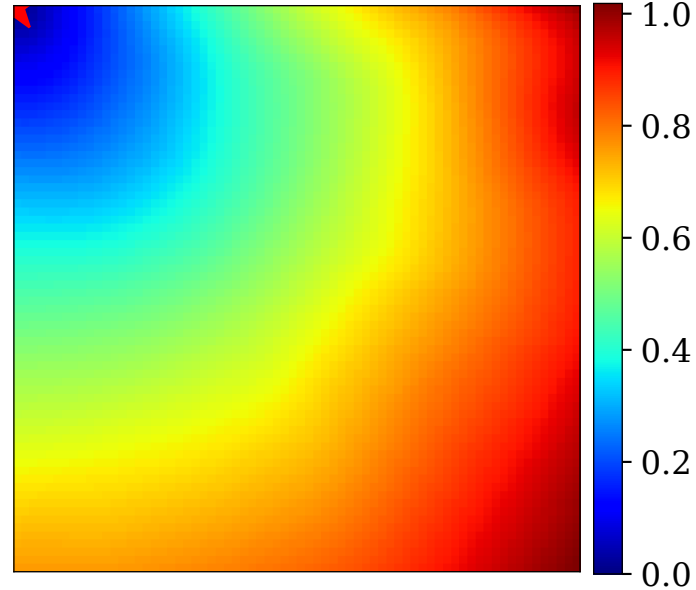

Absolute Error

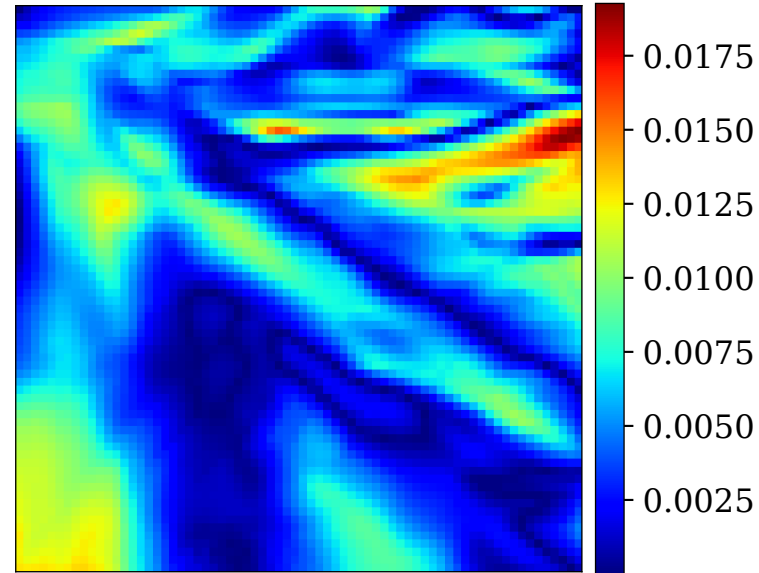

Supplement: supplementary_material [file gt_comp_top_99_(0, 0).pdf › EikonalENF_Jax-clean/experiments/fitting/figures/fwi_style_b/test/gt_comp_top_99_(0, 0).pdf]

Velocity Field

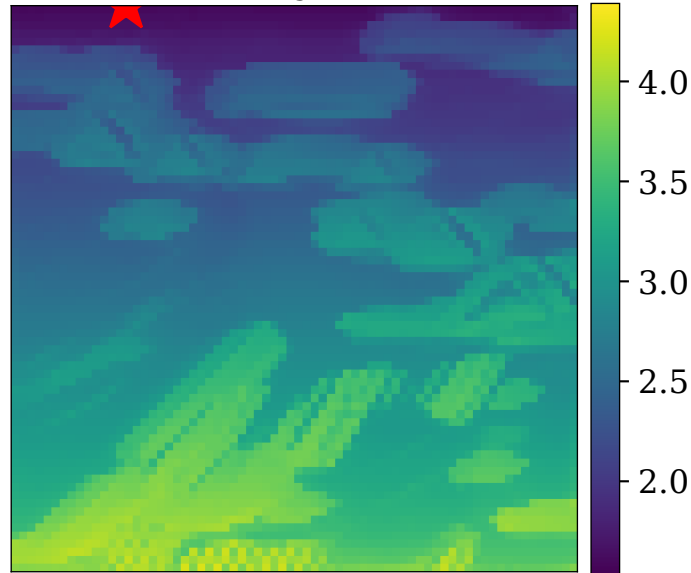

Ground Truth Time

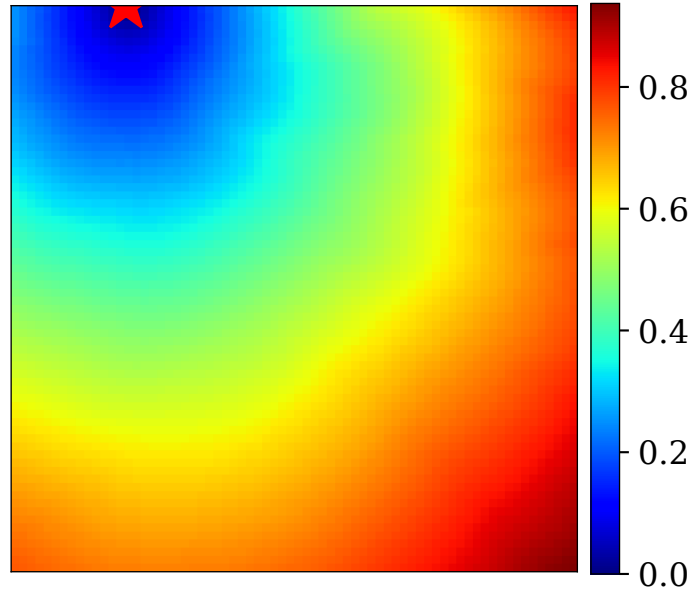

Predicted Time

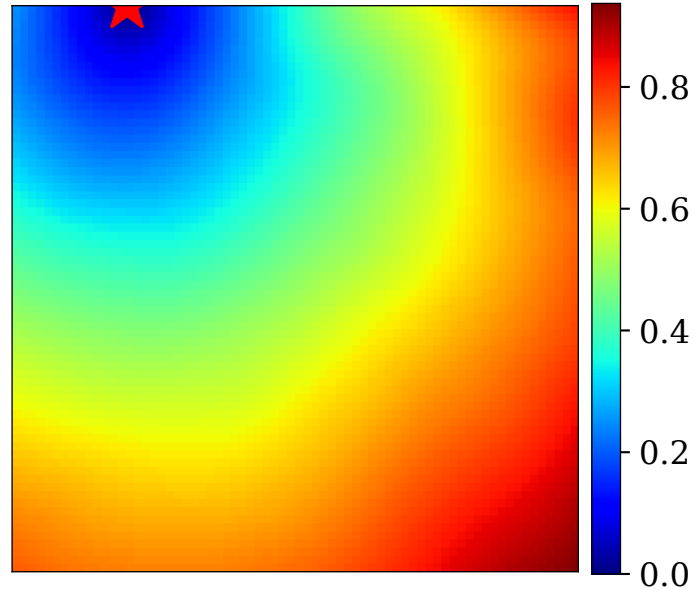

Absolute Error

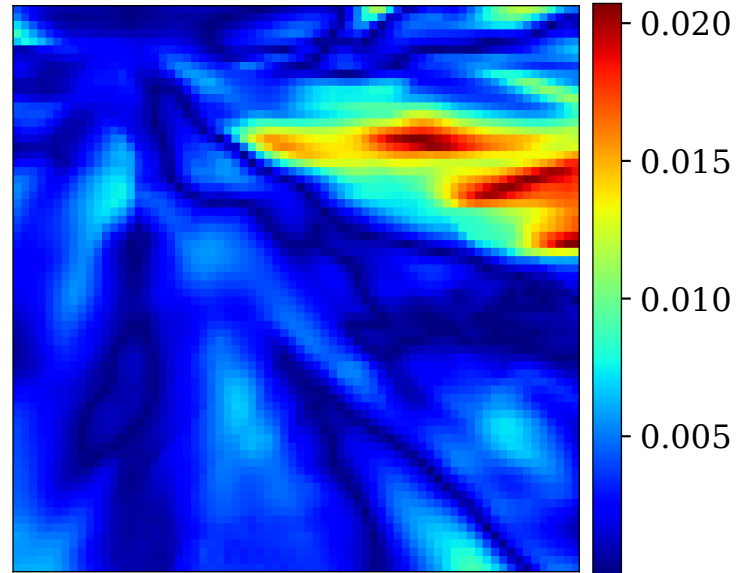

Supplement: supplementary_material [file gt_comp_top_99_(1, 0).pdf › EikonalENF_Jax-clean/experiments/fitting/figures/fwi_style_b/test/gt_comp_top_99_(1, 0).pdf]

Velocity Field

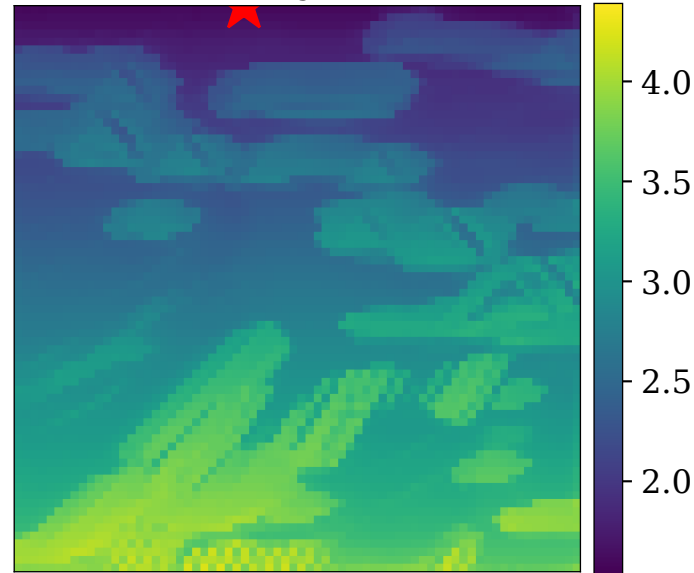

Ground Truth Time

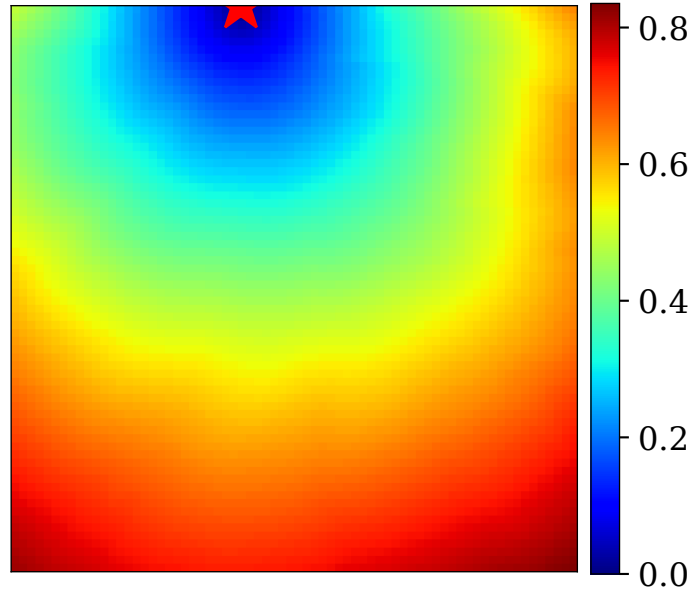

Predicted Time

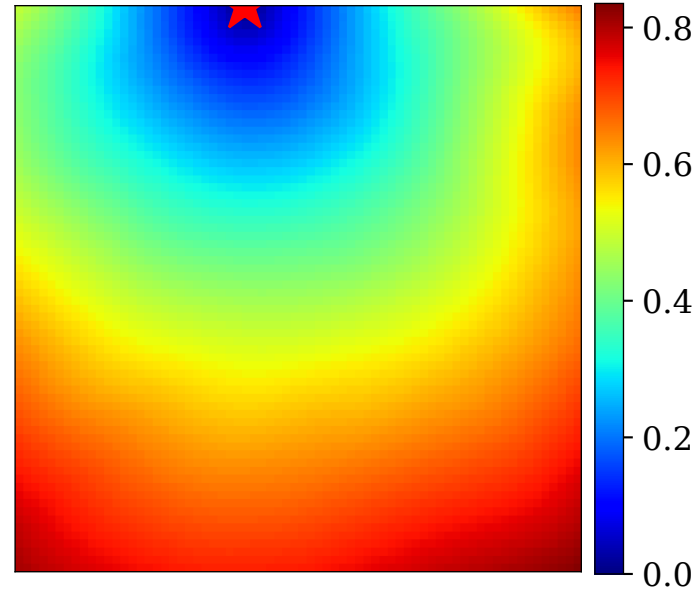

Absolute Error

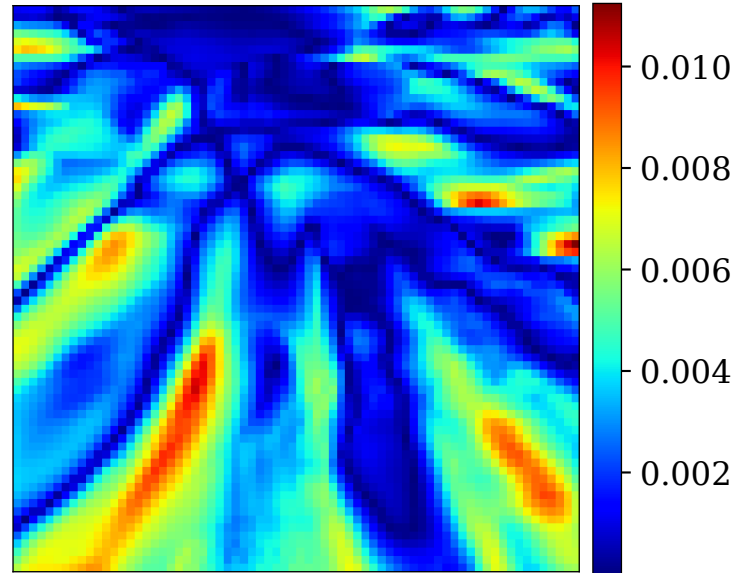

Supplement: supplementary_material [file gt_comp_top_99_(2, 0).pdf › EikonalENF_Jax-clean/experiments/fitting/figures/fwi_style_b/test/gt_comp_top_99_(2, 0).pdf]

Velocity Field

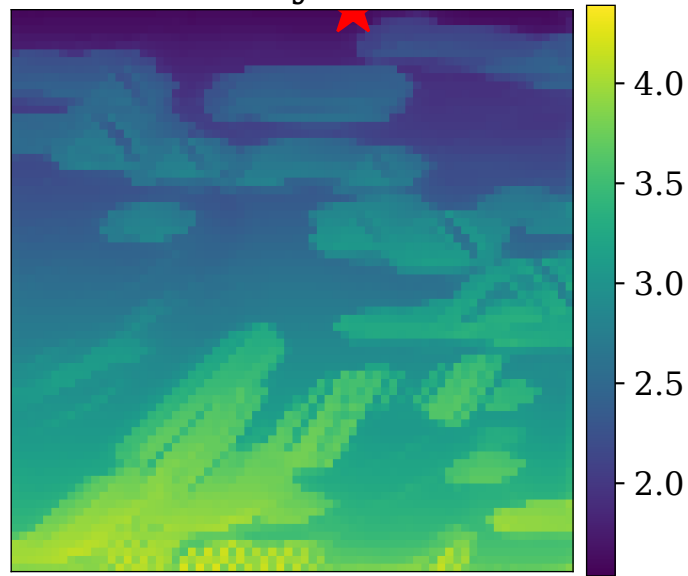

Ground Truth Time

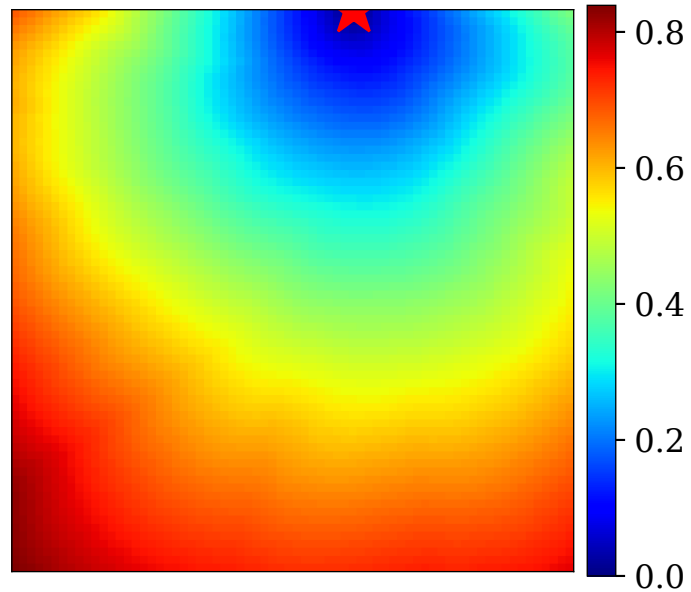

Predicted Time

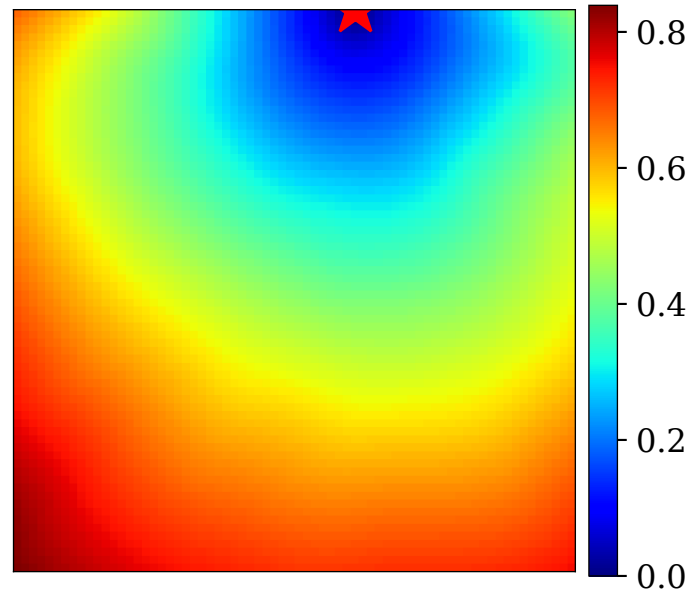

Absolute Error

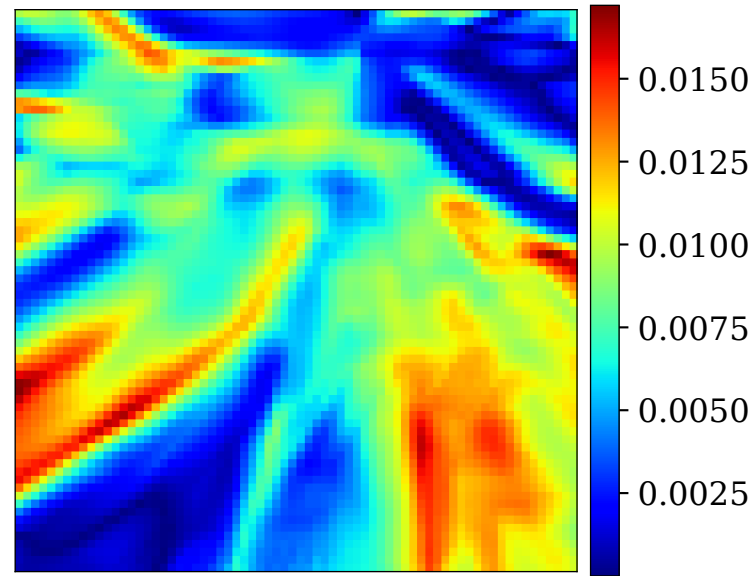

Supplement: supplementary_material [file gt_comp_top_99_(3, 0).pdf › EikonalENF_Jax-clean/experiments/fitting/figures/fwi_style_b/test/gt_comp_top_99_(3, 0).pdf]

Velocity Field

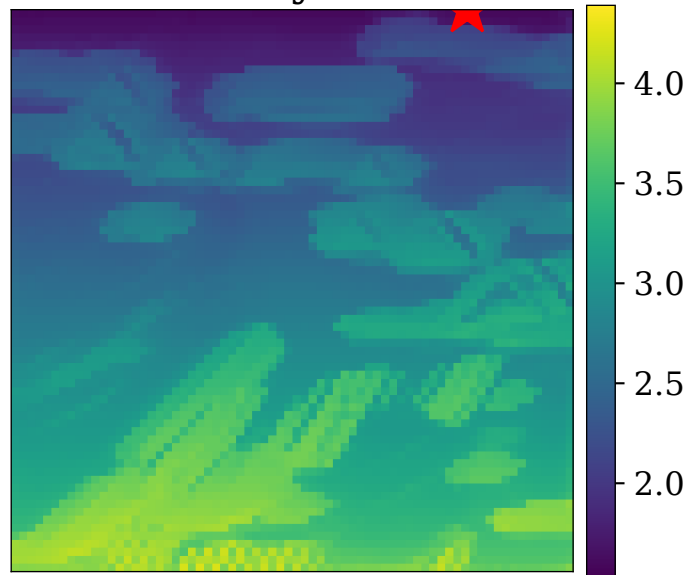

Ground Truth Time

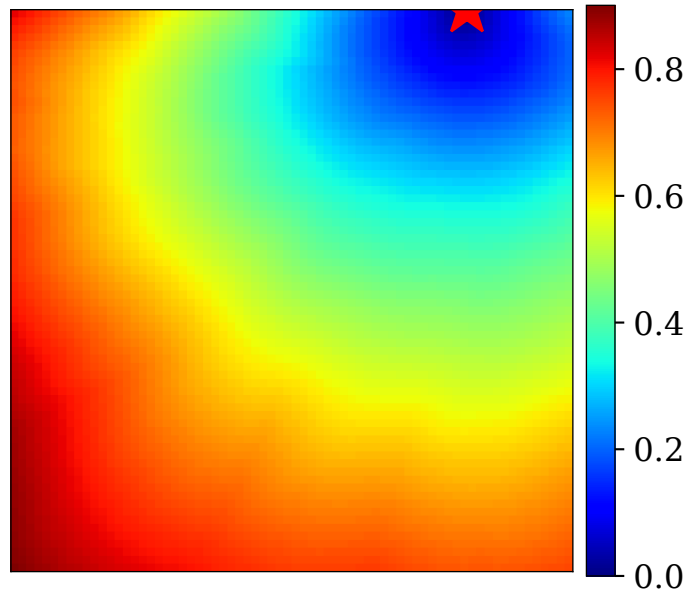

Predicted Time

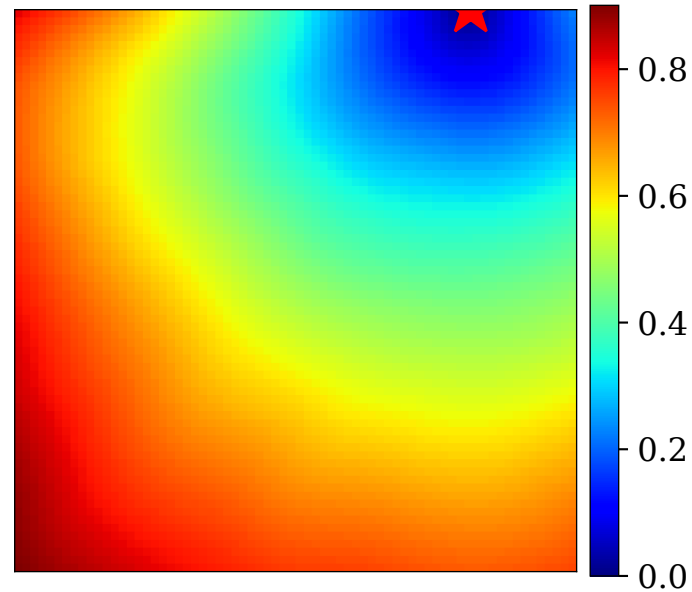

Absolute Error

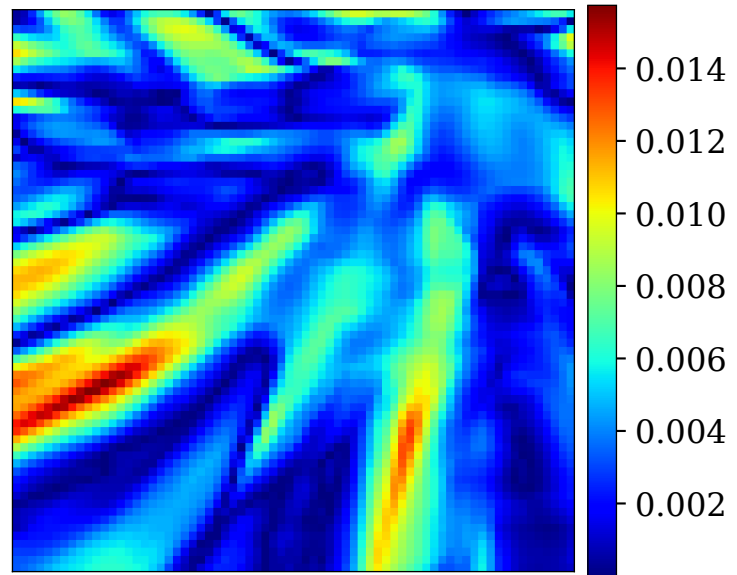

Supplement: supplementary_material [file gt_comp_top_99_(4, 0).pdf › EikonalENF_Jax-clean/experiments/fitting/figures/fwi_style_b/test/gt_comp_top_99_(4, 0).pdf]

# CurveFault-A

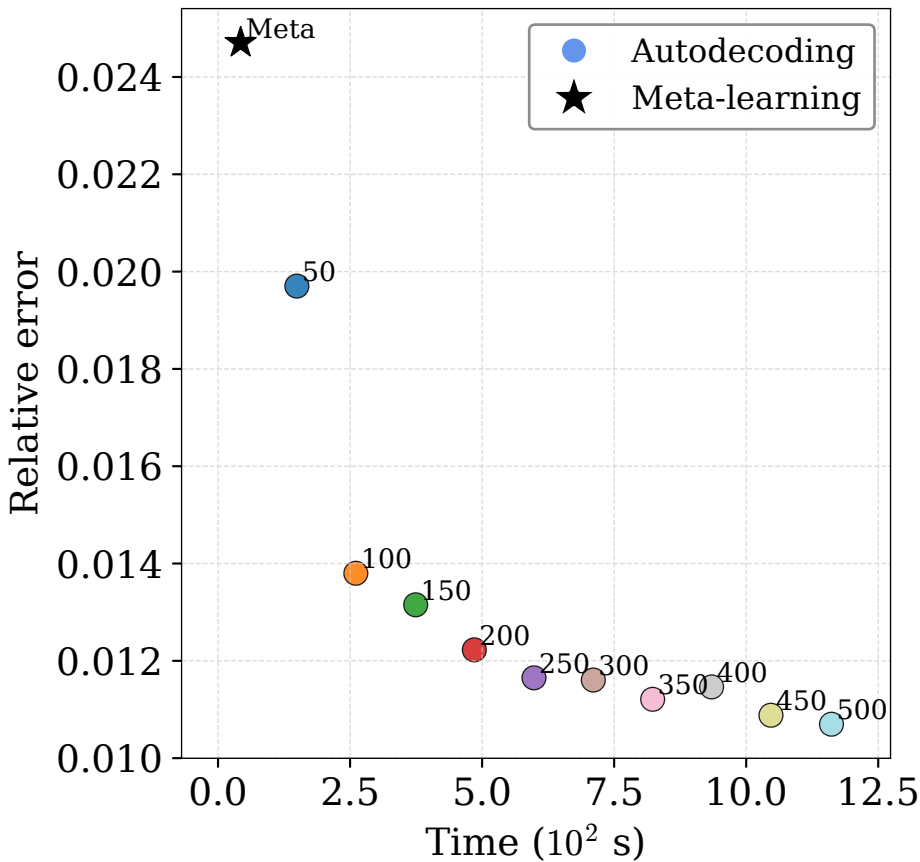

Supplement: supplementary_material [file result_fwi_curvefault_a_plot_meta_full.pdf › EikonalENF_Jax-clean/experiments/fitting/figures/result_fwi_curvefault_a_plot_meta_full.pdf]

# CurveFault-A

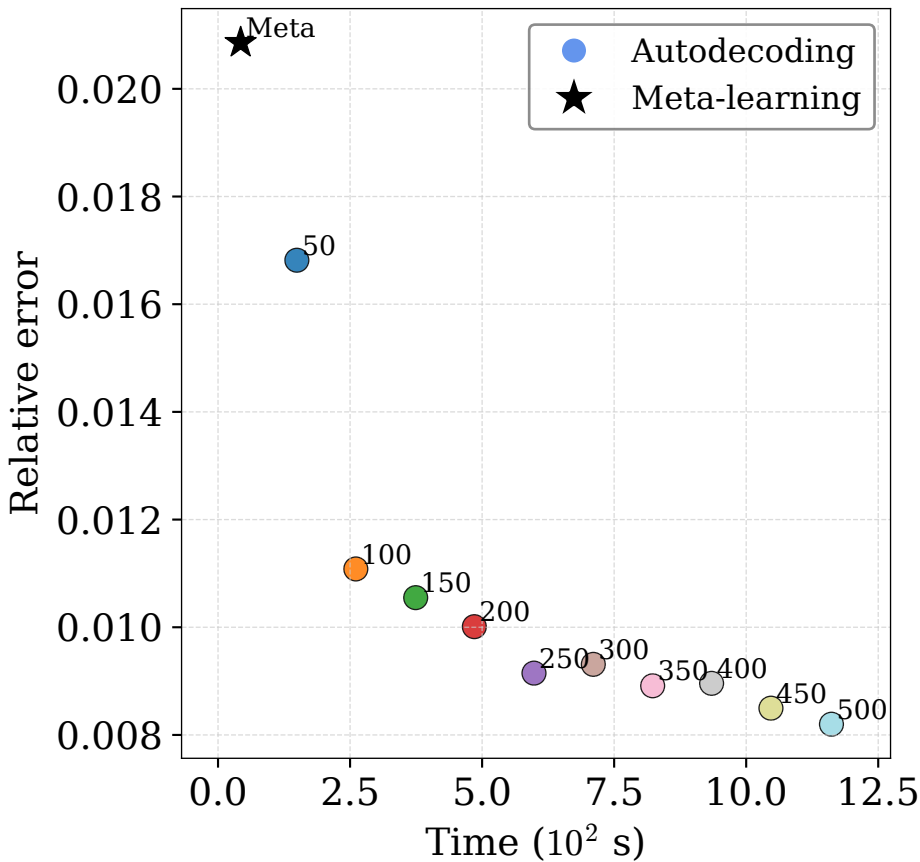

Supplement: supplementary_material [file result_fwi_curvefault_a_plot_meta_top.pdf › EikonalENF_Jax-clean/experiments/fitting/figures/result_fwi_curvefault_a_plot_meta_top.pdf]

# CurveFault-B

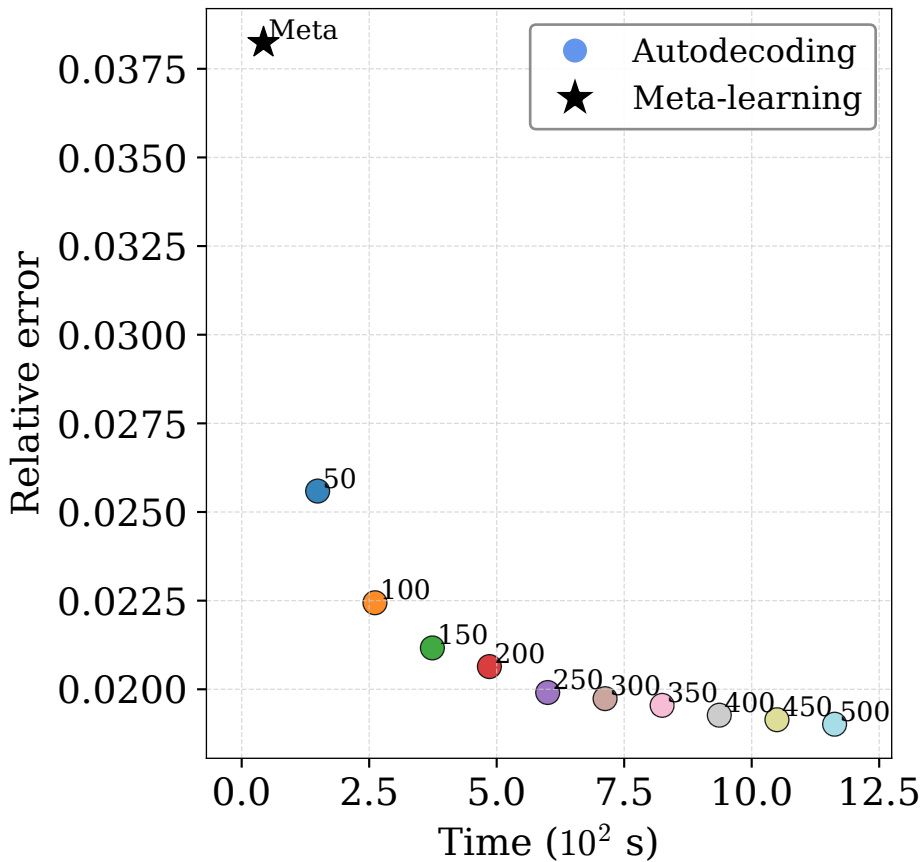

Supplement: supplementary_material [file result_fwi_curvefault_b_plot_meta_full.pdf › EikonalENF_Jax-clean/experiments/fitting/figures/result_fwi_curvefault_b_plot_meta_full.pdf]

# CurveFault-B

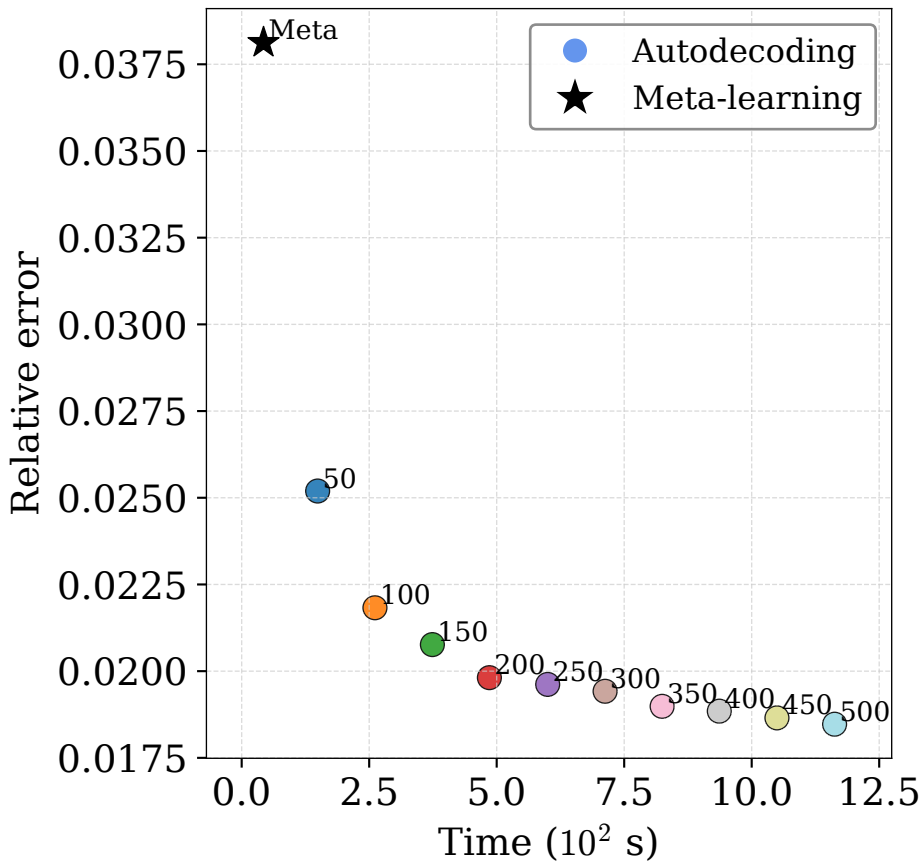

Supplement: supplementary_material [file result_fwi_curvefault_b_plot_meta_top.pdf › EikonalENF_Jax-clean/experiments/fitting/figures/result_fwi_curvefault_b_plot_meta_top.pdf]

# CurveVel-A

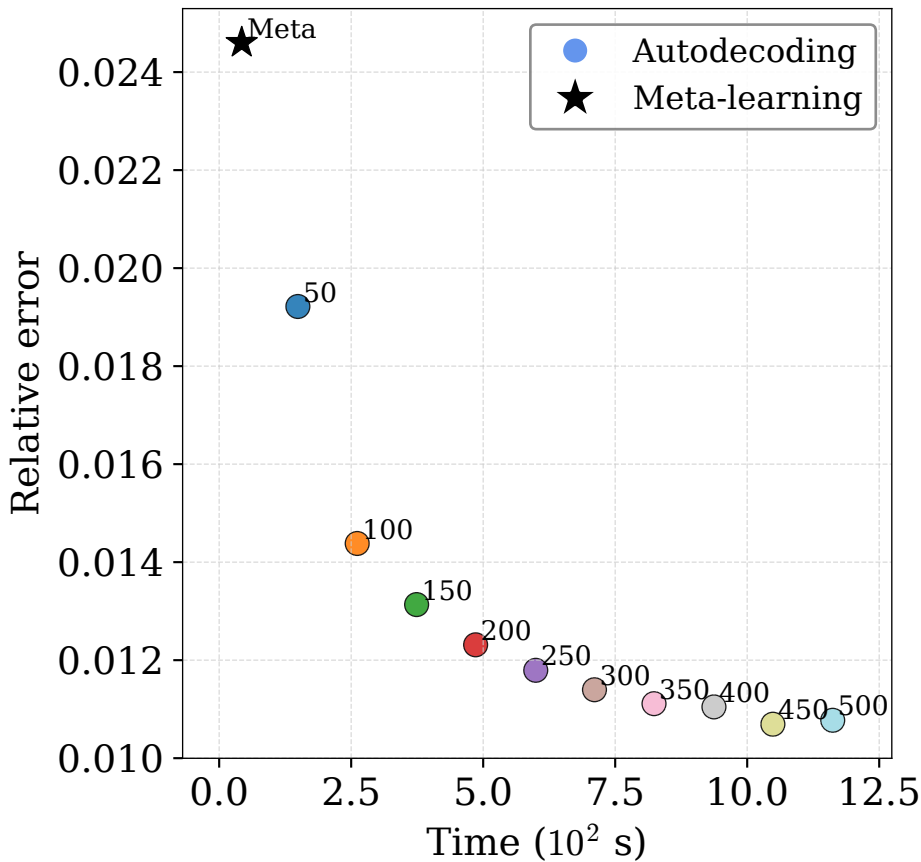

Supplement: supplementary_material [file result_fwi_curvevel_a_plot_meta_full.pdf › EikonalENF_Jax-clean/experiments/fitting/figures/result_fwi_curvevel_a_plot_meta_full.pdf]

# CurveVel-A

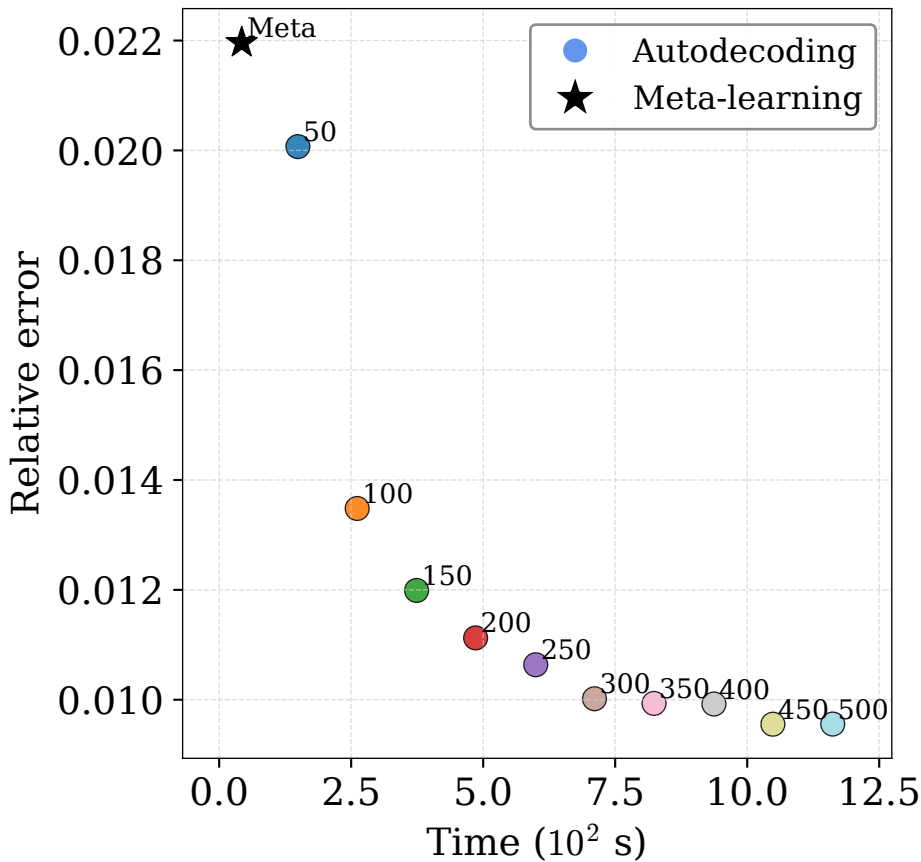

Supplement: supplementary_material [file result_fwi_curvevel_a_plot_meta_top.pdf › EikonalENF_Jax-clean/experiments/fitting/figures/result_fwi_curvevel_a_plot_meta_top.pdf]

CurveVel-B

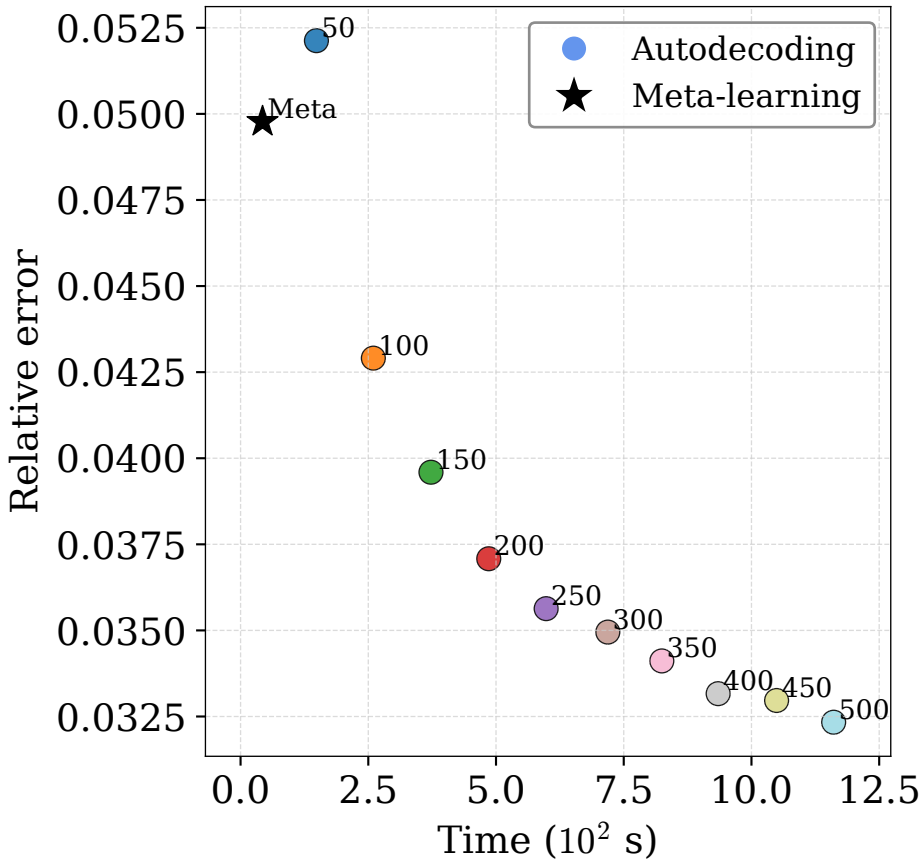

Supplement: supplementary_material [file result_fwi_curvevel_b_plot_meta_full.pdf › EikonalENF_Jax-clean/experiments/fitting/figures/result_fwi_curvevel_b_plot_meta_full.pdf]

CurveVel-B

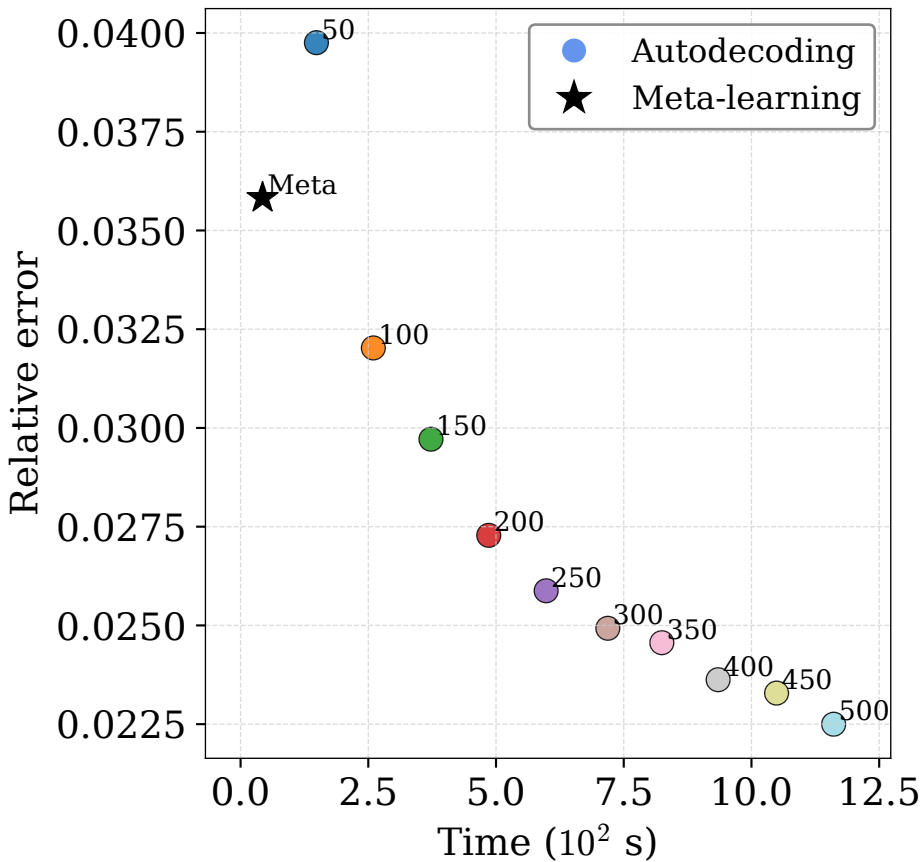

Supplement: supplementary_material [file result_fwi_curvevel_b_plot_meta_top.pdf › EikonalENF_Jax-clean/experiments/fitting/figures/result_fwi_curvevel_b_plot_meta_top.pdf]

# FlatFault-A

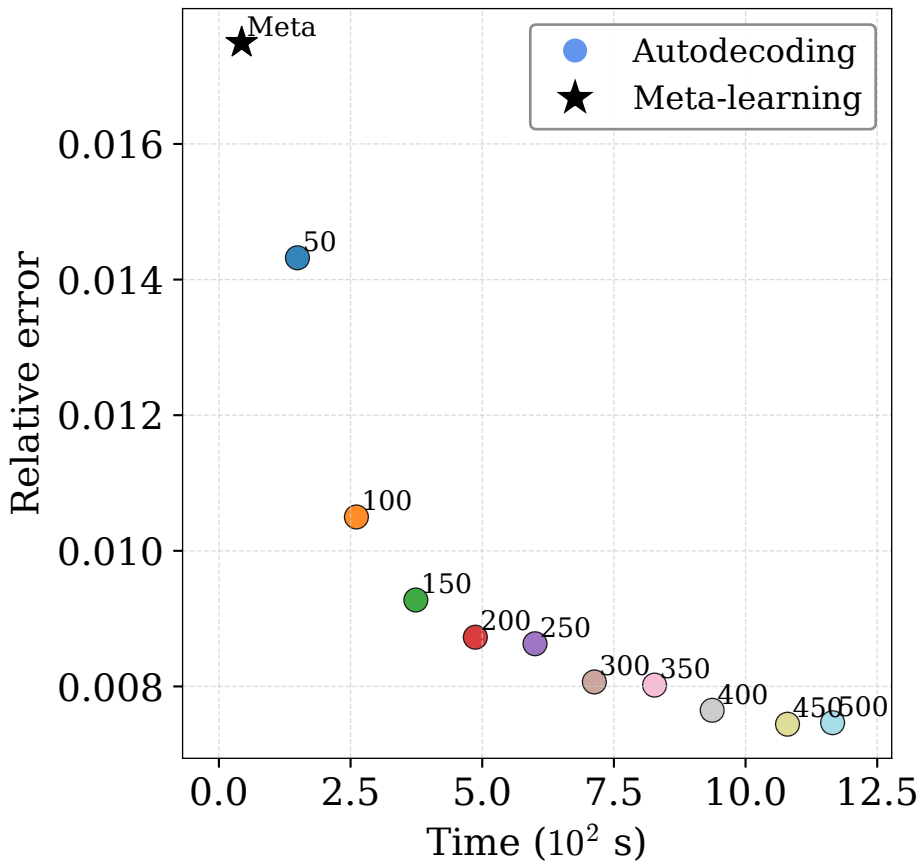

Supplement: supplementary_material [file result_fwi_flatfault_a_plot_meta_full.pdf › EikonalENF_Jax-clean/experiments/fitting/figures/result_fwi_flatfault_a_plot_meta_full.pdf]

# FlatFault-A

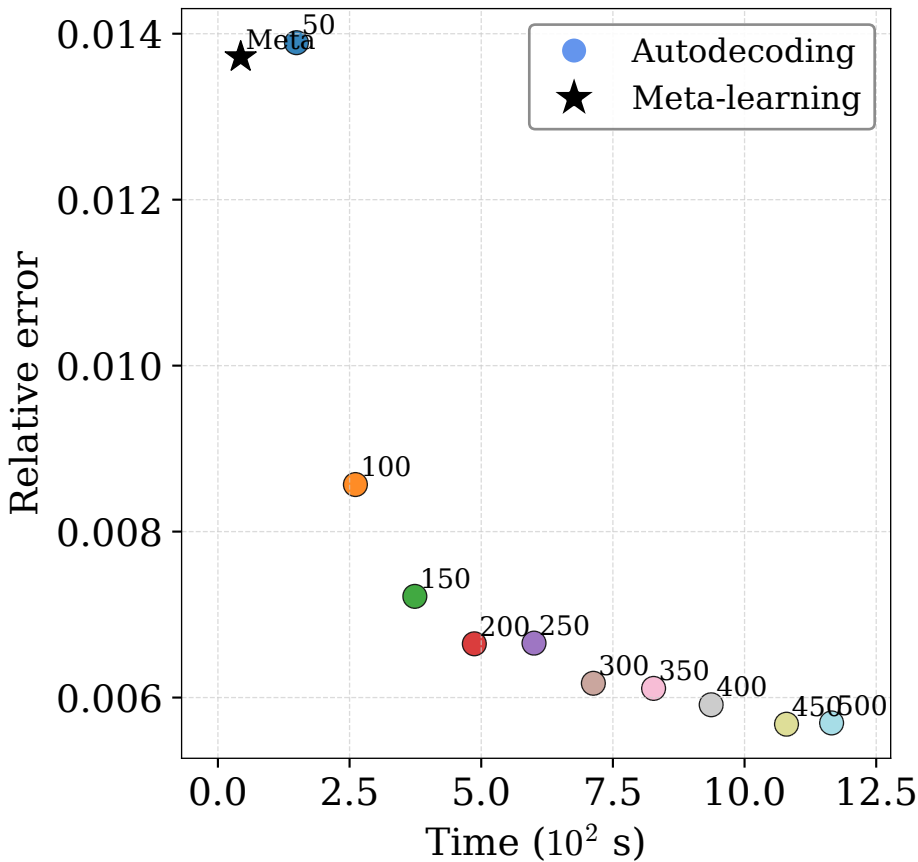

Supplement: supplementary_material [file result_fwi_flatfault_a_plot_meta_top.pdf › EikonalENF_Jax-clean/experiments/fitting/figures/result_fwi_flatfault_a_plot_meta_top.pdf]

# FlatFault-B

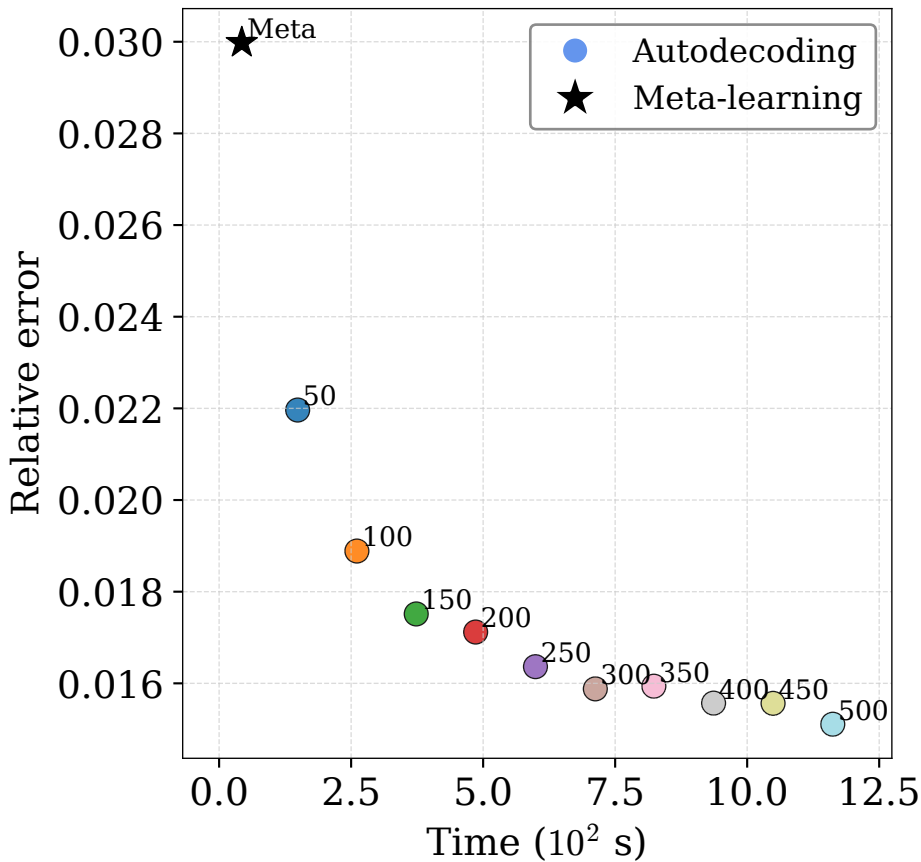

Supplement: supplementary_material [file result_fwi_flatfault_b_plot_meta_full.pdf › EikonalENF_Jax-clean/experiments/fitting/figures/result_fwi_flatfault_b_plot_meta_full.pdf]

# FlatFault-B

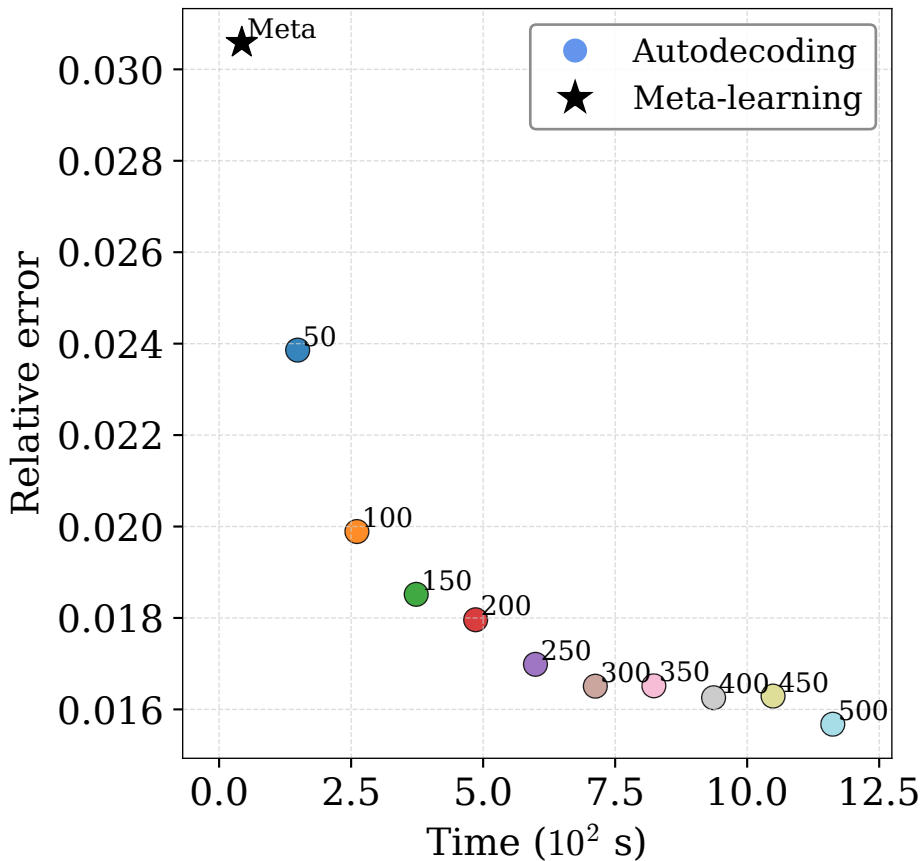

Supplement: supplementary_material [file result_fwi_flatfault_b_plot_meta_top.pdf › EikonalENF_Jax-clean/experiments/fitting/figures/result_fwi_flatfault_b_plot_meta_top.pdf]

# FlatVel-A

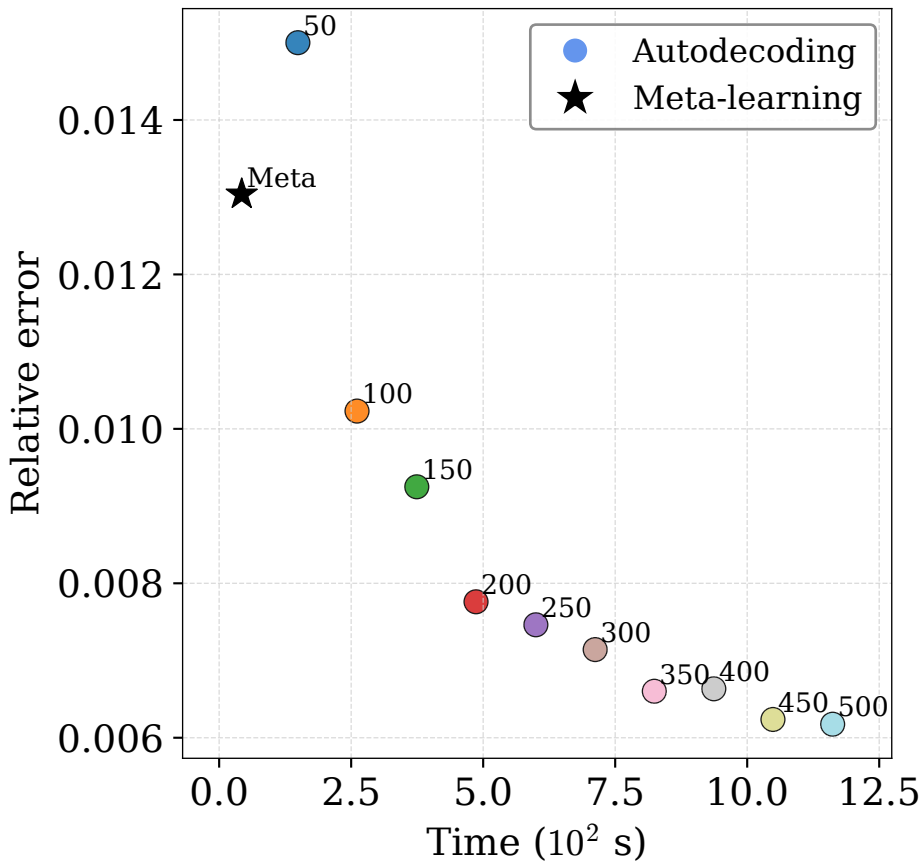

Supplement: supplementary_material [file result_fwi_flatvel_a_plot_meta_full.pdf › EikonalENF_Jax-clean/experiments/fitting/figures/result_fwi_flatvel_a_plot_meta_full.pdf]

# FlatVel-A

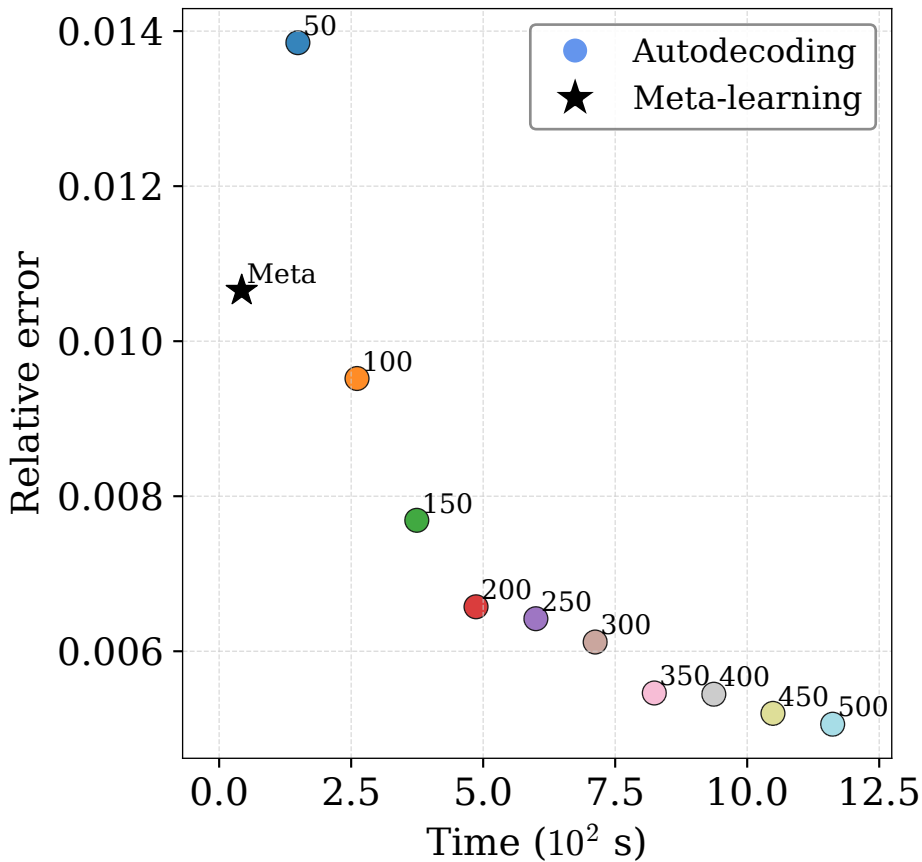

Supplement: supplementary_material [file result_fwi_flatvel_a_plot_meta_top.pdf › EikonalENF_Jax-clean/experiments/fitting/figures/result_fwi_flatvel_a_plot_meta_top.pdf]

# FlatVel-B

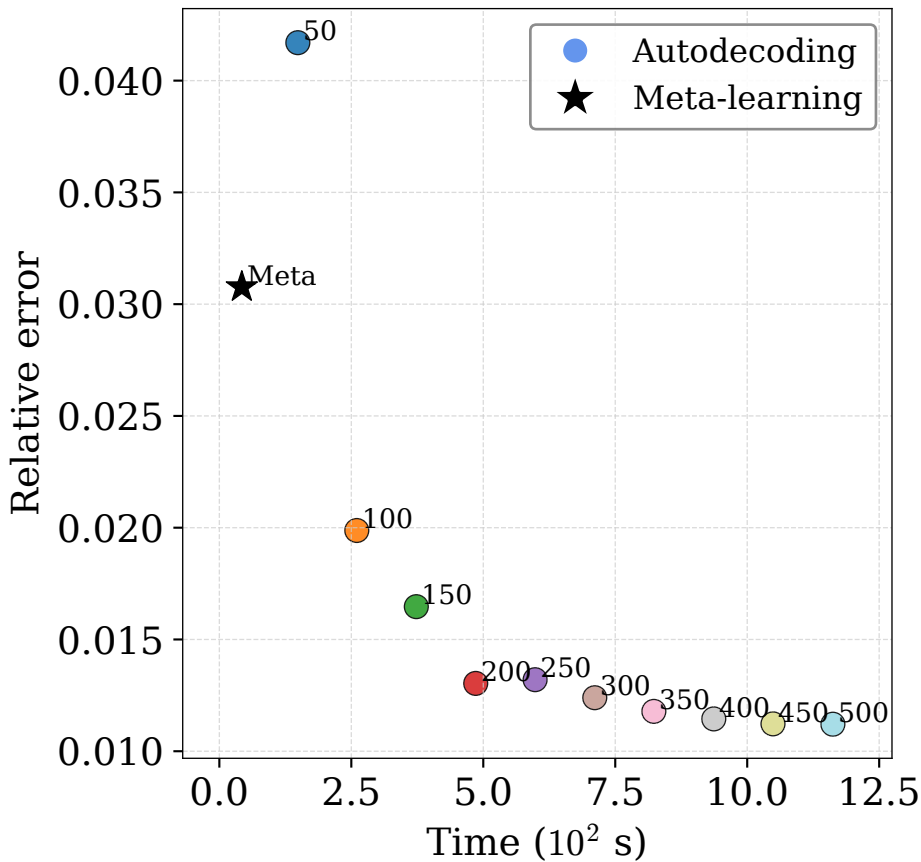

Supplement: supplementary_material [file result_fwi_flatvel_b_plot_meta_full.pdf › EikonalENF_Jax-clean/experiments/fitting/figures/result_fwi_flatvel_b_plot_meta_full.pdf]

# FlatVel-B

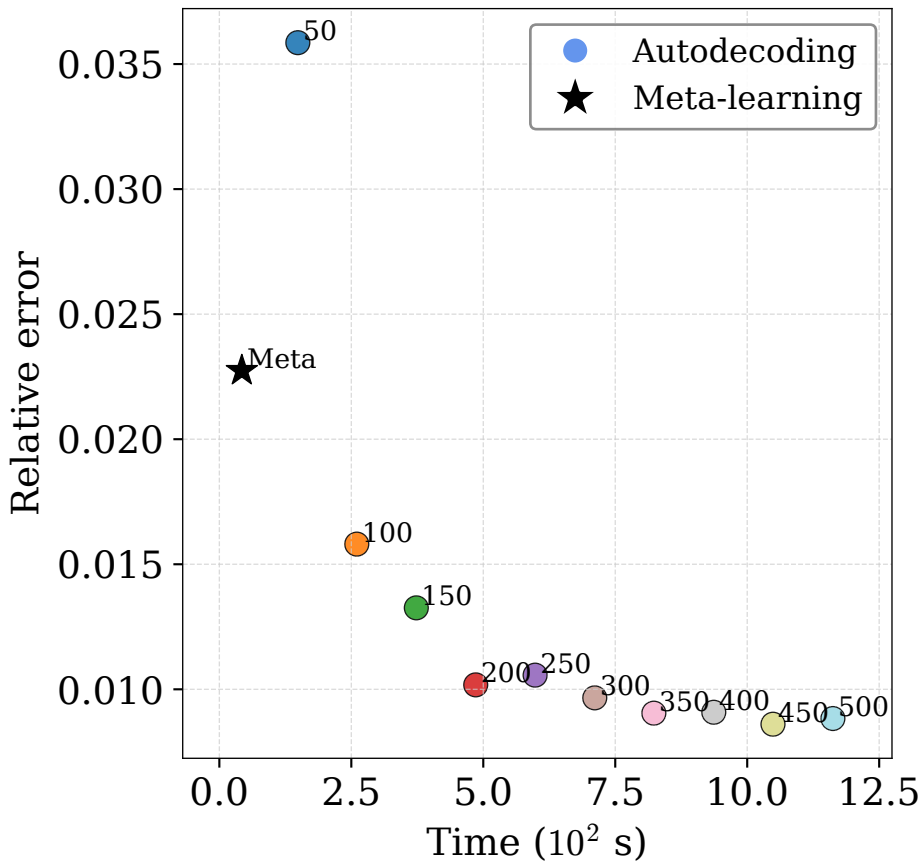

Supplement: supplementary_material [file result_fwi_flatvel_b_plot_meta_top.pdf › EikonalENF_Jax-clean/experiments/fitting/figures/result_fwi_flatvel_b_plot_meta_top.pdf]

Style-A

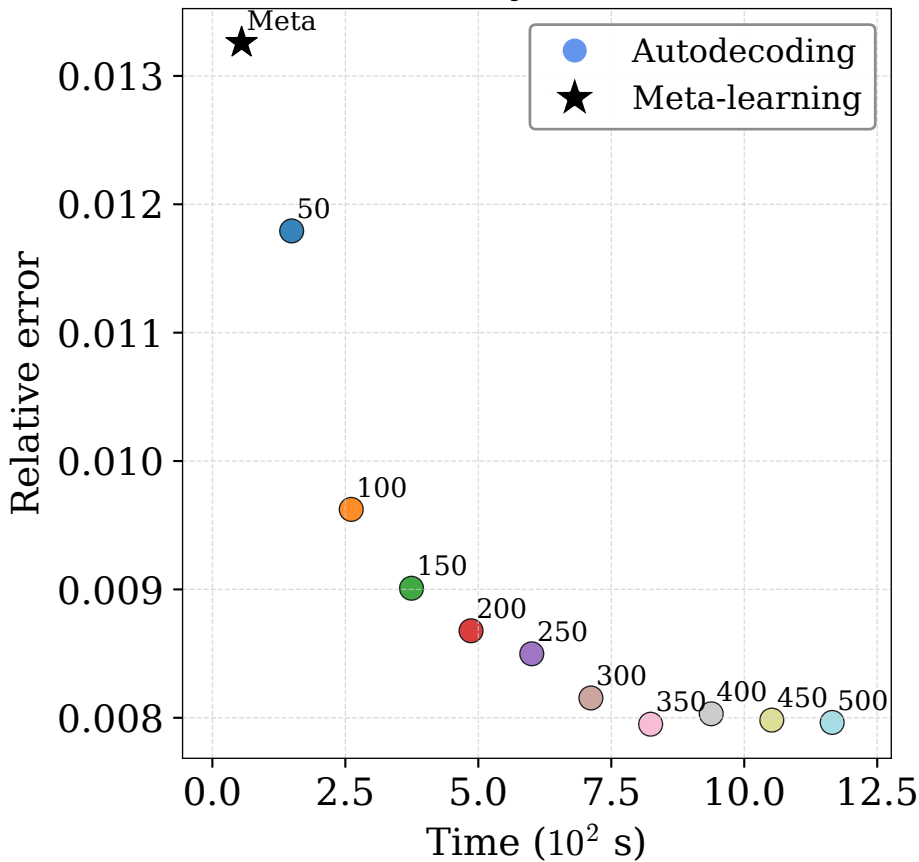

Supplement: supplementary_material [file result_fwi_style_a_plot_meta_full.pdf › EikonalENF_Jax-clean/experiments/fitting/figures/result_fwi_style_a_plot_meta_full.pdf]

Style-A

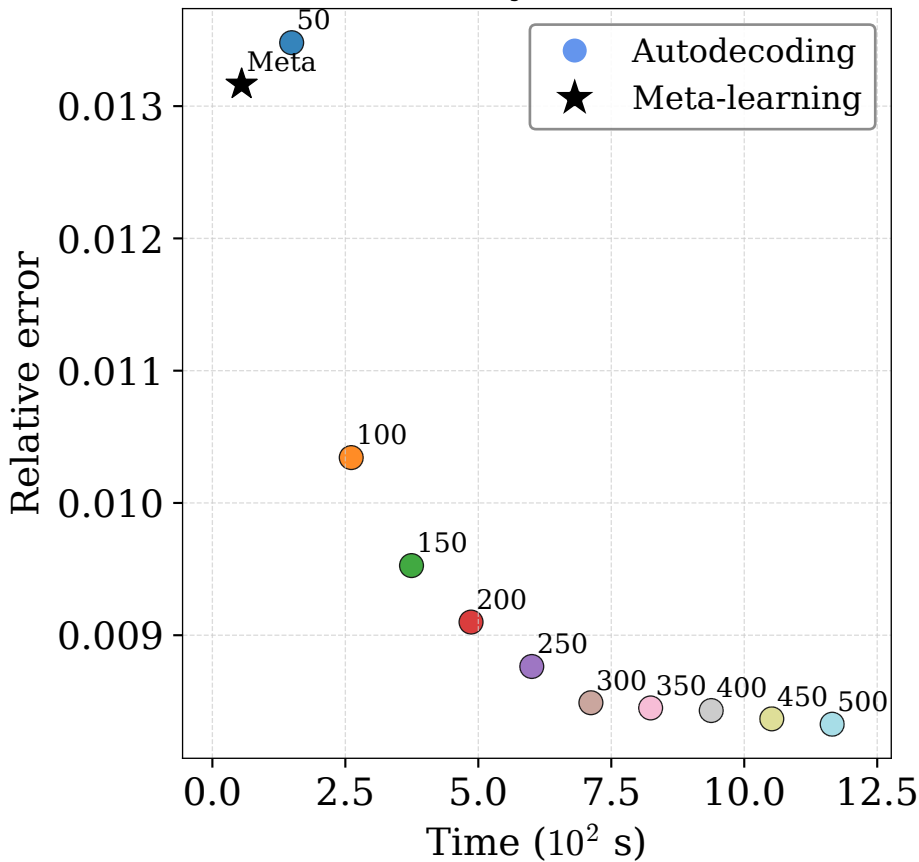

Supplement: supplementary_material [file result_fwi_style_a_plot_meta_top.pdf › EikonalENF_Jax-clean/experiments/fitting/figures/result_fwi_style_a_plot_meta_top.pdf]

## Style-B

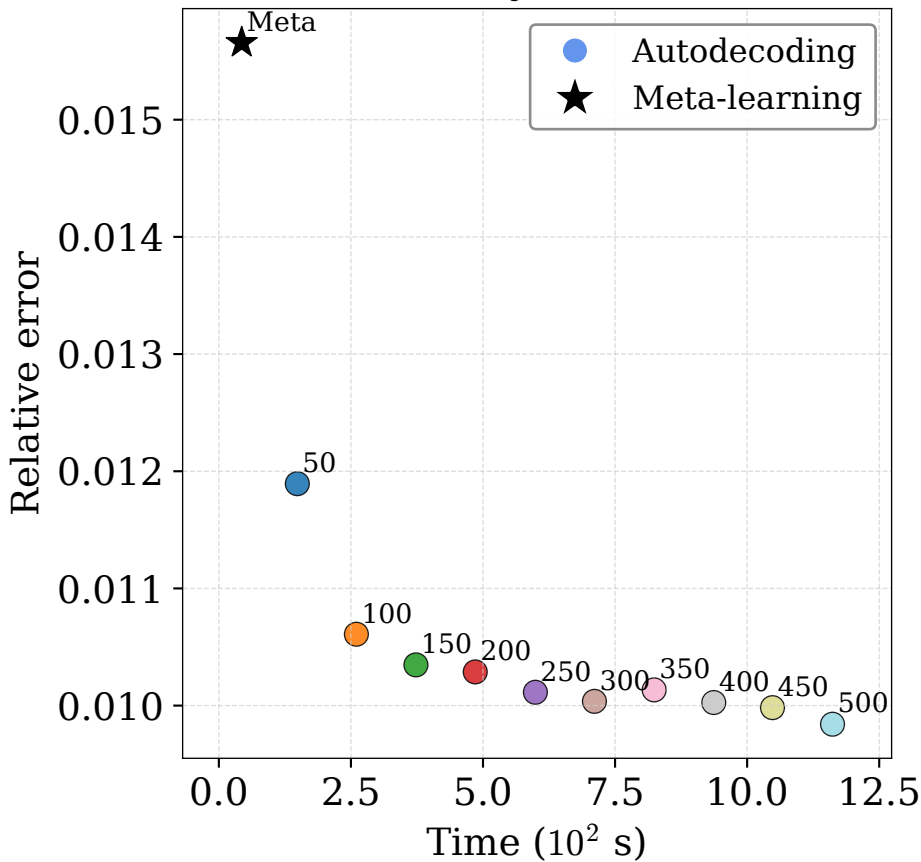

Supplement: supplementary_material [file result_fwi_style_b_plot_meta_full.pdf › EikonalENF_Jax-clean/experiments/fitting/figures/result_fwi_style_b_plot_meta_full.pdf]

## Style-B

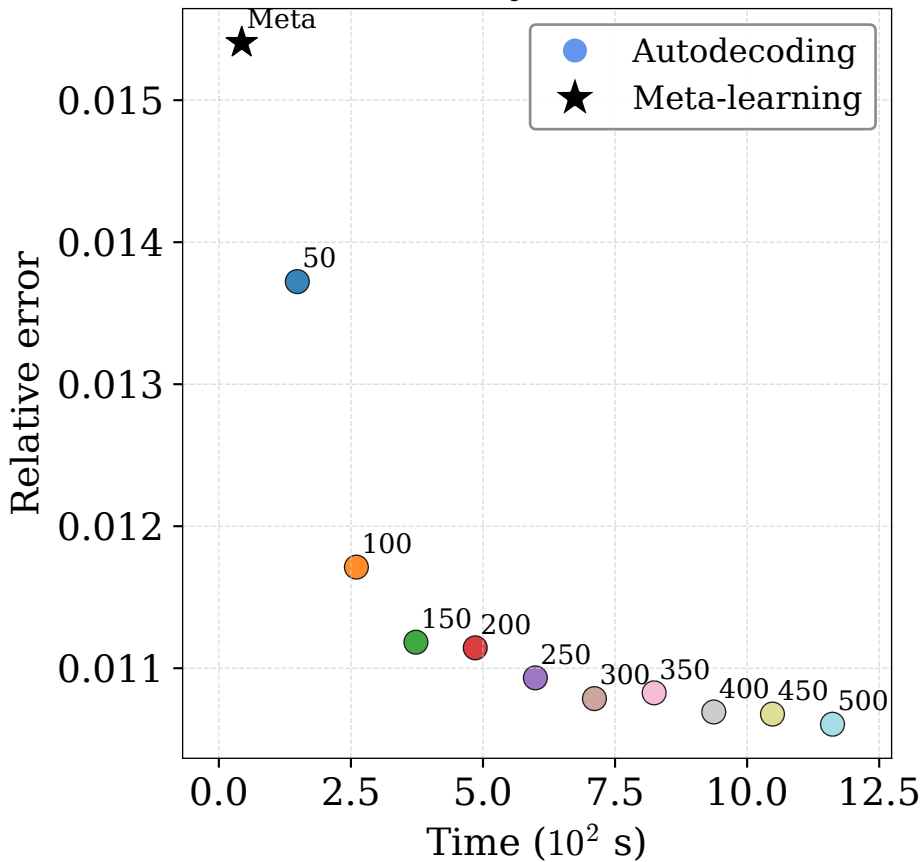

Supplement: supplementary_material [file result_fwi_style_b_plot_meta_top.pdf › EikonalENF_Jax-clean/experiments/fitting/figures/result_fwi_style_b_plot_meta_top.pdf]
